# Supplementary material
Source: PubMed Central journal article supplement (PMC4646175)
Supplement: supp_M115.645846_jbc.M115.645846-1.pdf [file supp_M115.645846_jbc.M115.645846-1.pdf]

PEDF\_P1\_final\_docking\_model.txt

REMARK The coordinates for chain A are taken from PDB: 1IMV, renumbered to match PEDF.

REMARK The coordinates for chain B are numbered from PEDF-R.

REMARK David Hoover, National Institutes of Health, 2012 Apr 02

|      |    |      |     |   |    |        |        |        |      |      |
|------|----|------|-----|---|----|--------|--------|--------|------|------|
| ATOM | 1  | N    | THR | A | 36 | 27.461 | 13.876 | 1.952  | 1.00 | 0.00 |
| ATOM | 2  | CA   | THR | A | 36 | 28.269 | 12.726 | 1.443  | 1.00 | 0.00 |
| ATOM | 3  | C    | THR | A | 36 | 29.776 | 13.022 | 1.512  | 1.00 | 0.00 |
| ATOM | 4  | O    | THR | A | 36 | 30.526 | 12.290 | 2.161  | 1.00 | 0.00 |
| ATOM | 5  | CB   | THR | A | 36 | 27.904 | 12.369 | -0.010 | 1.00 | 0.00 |
| ATOM | 6  | OG1  | THR | A | 36 | 26.525 | 11.985 | -0.078 | 1.00 | 0.00 |
| ATOM | 7  | CG2  | THR | A | 36 | 28.771 | 11.225 | -0.512 | 1.00 | 0.00 |
| ATOM | 8  | 1H   | THR | A | 36 | 26.802 | 14.328 | 1.352  | 1.00 | 0.00 |
| ATOM | 9  | 2H   | THR | A | 36 | 26.852 | 13.751 | 2.735  | 1.00 | 0.00 |
| ATOM | 10 | 3H   | THR | A | 36 | 27.919 | 14.702 | 2.280  | 1.00 | 0.00 |
| ATOM | 11 | HA   | THR | A | 36 | 28.098 | 11.850 | 2.069  | 1.00 | 0.00 |
| ATOM | 12 | HB   | THR | A | 36 | 28.059 | 13.245 | -0.640 | 1.00 | 0.00 |
| ATOM | 13 | HG1  | THR | A | 36 | 26.299 | 11.763 | -0.985 | 1.00 | 0.00 |
| ATOM | 14 | 1HG2 | THR | A | 36 | 28.498 | 10.987 | -1.540 | 1.00 | 0.00 |
| ATOM | 15 | 2HG2 | THR | A | 36 | 29.819 | 11.518 | -0.472 | 1.00 | 0.00 |
| ATOM | 16 | 3HG2 | THR | A | 36 | 28.615 | 10.349 | 0.116  | 1.00 | 0.00 |
| ATOM | 17 | N    | GLY | A | 37 | 30.218 | 14.085 | 0.840  | 1.00 | 0.00 |
| ATOM | 18 | CA   | GLY | A | 37 | 31.628 | 14.445 | 0.871  | 1.00 | 0.00 |
| ATOM | 19 | C    | GLY | A | 37 | 32.381 | 14.375 | -0.445 | 1.00 | 0.00 |
| ATOM | 20 | O    | GLY | A | 37 | 33.543 | 14.775 | -0.512 | 1.00 | 0.00 |
| ATOM | 21 | H    | GLY | A | 37 | 29.577 | 14.651 | 0.302  | 1.00 | 0.00 |
| ATOM | 22 | 1HA  | GLY | A | 37 | 31.726 | 15.473 | 1.222  | 1.00 | 0.00 |
| ATOM | 23 | 2HA  | GLY | A | 37 | 32.151 | 13.778 | 1.555  | 1.00 | 0.00 |
| ATOM | 24 | N    | ALA | A | 38 | 31.728 | 13.876 | -1.491 | 1.00 | 0.00 |
| ATOM | 25 | CA   | ALA | A | 38 | 32.355 | 13.749 | -2.807 | 1.00 | 0.00 |
| ATOM | 26 | C    | ALA | A | 38 | 32.166 | 14.986 | -3.679 | 1.00 | 0.00 |
| ATOM | 27 | O    | ALA | A | 38 | 31.283 | 15.802 | -3.433 | 1.00 | 0.00 |
| ATOM | 28 | CB   | ALA | A | 38 | 31.799 | 12.530 | -3.547 | 1.00 | 0.00 |
| ATOM | 29 | H    | ALA | A | 38 | 30.771 | 13.576 | -1.371 | 1.00 | 0.00 |
| ATOM | 30 | HA   | ALA | A | 38 | 33.430 | 13.632 | -2.672 | 1.00 | 0.00 |
| ATOM | 31 | 1HB  | ALA | A | 38 | 32.276 | 12.450 | -4.524 | 1.00 | 0.00 |
| ATOM | 32 | 2HB  | ALA | A | 38 | 32.003 | 11.629 | -2.969 | 1.00 | 0.00 |
| ATOM | 33 | 3HB  | ALA | A | 38 | 30.724 | 12.643 | -3.677 | 1.00 | 0.00 |
| ATOM | 34 | N    | LEU | A | 39 | 33.005 | 15.118 | -4.702 | 1.00 | 0.00 |
| ATOM | 35 | CA   | LEU | A | 39 | 32.929 | 16.248 | -5.623 | 1.00 | 0.00 |
| ATOM | 36 | C    | LEU | A | 39 | 31.893 | 16.032 | -6.727 | 1.00 | 0.00 |
| ATOM | 37 | O    | LEU | A | 39 | 32.000 | 15.112 | -7.543 | 1.00 | 0.00 |
| ATOM | 38 | CB   | LEU | A | 39 | 34.309 | 16.510 | -6.239 | 1.00 | 0.00 |
| ATOM | 39 | CG   | LEU | A | 39 | 34.372 | 17.682 | -7.226 | 1.00 | 0.00 |
| ATOM | 40 | CD1  | LEU | A | 39 | 34.074 | 18.990 | -6.504 | 1.00 | 0.00 |
| ATOM | 41 | CD2  | LEU | A | 39 | 35.746 | 17.727 | -7.877 | 1.00 | 0.00 |
| ATOM | 42 | H    | LEU | A | 39 | 33.715 | 14.414 | -4.844 | 1.00 | 0.00 |
| ATOM | 43 | HA   | LEU | A | 39 | 32.604 | 17.137 | -5.084 | 1.00 | 0.00 |
| ATOM | 44 | 1HB  | LEU | A | 39 | 34.863 | 16.754 | -5.334 | 1.00 | 0.00 |
| ATOM | 45 | 2HB  | LEU | A | 39 | 34.728 | 15.610 | -6.689 | 1.00 | 0.00 |
| ATOM | 46 | HG   | LEU | A | 39 | 33.638 | 17.486 | -8.009 | 1.00 | 0.00 |
| ATOM | 47 | 1HD1 | LEU | A | 39 | 34.120 | 19.816 | -7.214 | 1.00 | 0.00 |
| ATOM | 48 | 2HD1 | LEU | A | 39 | 33.076 | 18.944 | -6.066 | 1.00 | 0.00 |
| ATOM | 49 | 3HD1 | LEU | A | 39 | 34.810 | 19.146 | -5.717 | 1.00 | 0.00 |
| ATOM | 50 | 1HD2 | LEU | A | 39 | 35.789 | 18.560 | -8.579 | 1.00 | 0.00 |
| ATOM | 51 | 2HD2 | LEU | A | 39 | 36.509 | 17.859 | -7.109 | 1.00 | 0.00 |
| ATOM | 52 | 3HD2 | LEU | A | 39 | 35.927 | 16.794 | -8.411 | 1.00 | 0.00 |
| ATOM | 53 | N    | VAL | A | 40 | 30.888 | 16.900 | -6.737 | 1.00 | 0.00 |
| ATOM | 54 | CA   | VAL | A | 40 | 29.806 | 16.842 | -7.713 | 1.00 | 0.00 |
| ATOM | 55 | C    | VAL | A | 40 | 29.404 | 18.256 | -8.141 | 1.00 | 0.00 |
| ATOM | 56 | O    | VAL | A | 40 | 29.894 | 19.247 | -7.590 | 1.00 | 0.00 |
| ATOM | 57 | CB   | VAL | A | 40 | 28.574 | 16.105 | -7.155 | 1.00 | 0.00 |
| ATOM | 58 | CG1  | VAL | A | 40 | 28.921 | 14.661 | -6.826 | 1.00 | 0.00 |
| ATOM | 59 | CG2  | VAL | A | 40 | 28.041 | 16.818 | -5.921 | 1.00 | 0.00 |

PEDF\_P1\_final\_docking\_model.txt

|      |     |      |     |   |    |        |        |         |      |      |
|------|-----|------|-----|---|----|--------|--------|---------|------|------|
| ATOM | 60  | H    | VAL | A | 40 | 30.880 | 17.627 | -6.036  | 1.00 | 0.00 |
| ATOM | 61  | HA   | VAL | A | 40 | 30.124 | 16.341 | -8.628  | 1.00 | 0.00 |
| ATOM | 62  | HB   | VAL | A | 40 | 27.780 | 16.127 | -7.901  | 1.00 | 0.00 |
| ATOM | 63  | 1HG1 | VAL | A | 40 | 28.038 | 14.155 | -6.433  | 1.00 | 0.00 |
| ATOM | 64  | 2HG1 | VAL | A | 40 | 29.257 | 14.153 | -7.729  | 1.00 | 0.00 |
| ATOM | 65  | 3HG1 | VAL | A | 40 | 29.714 | 14.638 | -6.079  | 1.00 | 0.00 |
| ATOM | 66  | 1HG2 | VAL | A | 40 | 27.170 | 16.285 | -5.540  | 1.00 | 0.00 |
| ATOM | 67  | 2HG2 | VAL | A | 40 | 28.815 | 16.844 | -5.154  | 1.00 | 0.00 |
| ATOM | 68  | 3HG2 | VAL | A | 40 | 27.755 | 17.836 | -6.184  | 1.00 | 0.00 |
| ATOM | 69  | N    | GLU | A | 41 | 28.512 | 18.346 | -9.123  | 1.00 | 0.00 |
| ATOM | 70  | CA   | GLU | A | 41 | 28.045 | 19.640 | -9.603  | 1.00 | 0.00 |
| ATOM | 71  | C    | GLU | A | 41 | 26.909 | 20.161 | -8.738  | 1.00 | 0.00 |
| ATOM | 72  | O    | GLU | A | 41 | 26.059 | 19.396 | -8.275  | 1.00 | 0.00 |
| ATOM | 73  | CB   | GLU | A | 41 | 27.594 | 19.543 | -11.062 | 1.00 | 0.00 |
| ATOM | 74  | CG   | GLU | A | 41 | 28.719 | 19.266 | -12.050 | 1.00 | 0.00 |
| ATOM | 75  | CD   | GLU | A | 41 | 29.729 | 20.379 | -12.053 | 1.00 | 0.00 |
| ATOM | 76  | OE1  | GLU | A | 41 | 29.342 | 21.508 | -12.238 | 1.00 | 0.00 |
| ATOM | 77  | OE2  | GLU | A | 41 | 30.872 | 20.118 | -11.759 | 1.00 | 0.00 |
| ATOM | 78  | H    | GLU | A | 41 | 28.149 | 17.504 | -9.547  | 1.00 | 0.00 |
| ATOM | 79  | HA   | GLU | A | 41 | 28.851 | 20.372 | -9.537  | 1.00 | 0.00 |
| ATOM | 80  | 1HB  | GLU | A | 41 | 26.859 | 18.739 | -11.115 | 1.00 | 0.00 |
| ATOM | 81  | 2HB  | GLU | A | 41 | 27.116 | 20.490 | -11.312 | 1.00 | 0.00 |
| ATOM | 82  | 1HG  | GLU | A | 41 | 29.225 | 18.317 | -11.877 | 1.00 | 0.00 |
| ATOM | 83  | 2HG  | GLU | A | 41 | 28.211 | 19.235 | -13.014 | 1.00 | 0.00 |
| ATOM | 84  | N    | GLU | A | 42 | 26.905 | 21.474 | -8.526  | 1.00 | 0.00 |
| ATOM | 85  | CA   | GLU | A | 42 | 25.887 | 22.134 | -7.717  | 1.00 | 0.00 |
| ATOM | 86  | C    | GLU | A | 42 | 24.481 | 22.064 | -8.301  | 1.00 | 0.00 |
| ATOM | 87  | O    | GLU | A | 42 | 24.295 | 22.082 | -9.517  | 1.00 | 0.00 |
| ATOM | 88  | CB   | GLU | A | 42 | 26.273 | 23.599 | -7.501  | 1.00 | 0.00 |
| ATOM | 89  | CG   | GLU | A | 42 | 27.484 | 23.803 | -6.601  | 1.00 | 0.00 |
| ATOM | 90  | CD   | GLU | A | 42 | 27.221 | 23.304 | -5.208  | 1.00 | 0.00 |
| ATOM | 91  | OE1  | GLU | A | 42 | 26.281 | 23.760 | -4.602  | 1.00 | 0.00 |
| ATOM | 92  | OE2  | GLU | A | 42 | 27.888 | 22.387 | -4.791  | 1.00 | 0.00 |
| ATOM | 93  | H    | GLU | A | 42 | 27.638 | 22.029 | -8.944  | 1.00 | 0.00 |
| ATOM | 94  | HA   | GLU | A | 42 | 25.807 | 21.640 | -6.748  | 1.00 | 0.00 |
| ATOM | 95  | 1HB  | GLU | A | 42 | 26.476 | 24.023 | -8.484  | 1.00 | 0.00 |
| ATOM | 96  | 2HB  | GLU | A | 42 | 25.408 | 24.096 | -7.062  | 1.00 | 0.00 |
| ATOM | 97  | 1HG  | GLU | A | 42 | 28.393 | 23.341 | -6.986  | 1.00 | 0.00 |
| ATOM | 98  | 2HG  | GLU | A | 42 | 27.609 | 24.885 | -6.582  | 1.00 | 0.00 |
| ATOM | 99  | N    | GLU | A | 43 | 23.494 | 21.995 | -7.414  | 1.00 | 0.00 |
| ATOM | 100 | CA   | GLU | A | 43 | 22.100 | 21.928 | -7.822  | 1.00 | 0.00 |
| ATOM | 101 | C    | GLU | A | 43 | 21.318 | 23.165 | -7.406  | 1.00 | 0.00 |
| ATOM | 102 | O    | GLU | A | 43 | 20.744 | 23.828 | -8.268  | 1.00 | 0.00 |
| ATOM | 103 | CB   | GLU | A | 43 | 21.440 | 20.676 | -7.241  | 1.00 | 0.00 |
| ATOM | 104 | CG   | GLU | A | 43 | 21.998 | 19.365 | -7.777  | 1.00 | 0.00 |
| ATOM | 105 | CD   | GLU | A | 43 | 21.275 | 18.184 | -7.190  | 1.00 | 0.00 |
| ATOM | 106 | OE1  | GLU | A | 43 | 20.382 | 18.388 | -6.404  | 1.00 | 0.00 |
| ATOM | 107 | OE2  | GLU | A | 43 | 21.540 | 17.082 | -7.612  | 1.00 | 0.00 |
| ATOM | 108 | H    | GLU | A | 43 | 23.719 | 21.989 | -6.429  | 1.00 | 0.00 |
| ATOM | 109 | HA   | GLU | A | 43 | 22.035 | 21.887 | -8.910  | 1.00 | 0.00 |
| ATOM | 110 | 1HB  | GLU | A | 43 | 21.580 | 20.714 | -6.160  | 1.00 | 0.00 |
| ATOM | 111 | 2HB  | GLU | A | 43 | 20.377 | 20.739 | -7.472  | 1.00 | 0.00 |
| ATOM | 112 | 1HG  | GLU | A | 43 | 21.978 | 19.298 | -8.864  | 1.00 | 0.00 |
| ATOM | 113 | 2HG  | GLU | A | 43 | 23.031 | 19.366 | -7.432  | 1.00 | 0.00 |
| ATOM | 114 | N    | ASP | A | 44 | 21.282 | 23.486 | -6.107  | 1.00 | 0.00 |
| ATOM | 115 | CA   | ASP | A | 44 | 20.545 | 24.684 | -5.689  | 1.00 | 0.00 |
| ATOM | 116 | C    | ASP | A | 44 | 21.231 | 25.773 | -6.507  | 1.00 | 0.00 |
| ATOM | 117 | O    | ASP | A | 44 | 22.445 | 25.973 | -6.415  | 1.00 | 0.00 |
| ATOM | 118 | CB   | ASP | A | 44 | 20.627 | 24.949 | -4.184  | 1.00 | 0.00 |
| ATOM | 119 | CG   | ASP | A | 44 | 19.818 | 23.981 | -3.330  | 1.00 | 0.00 |
| ATOM | 120 | OD1  | ASP | A | 44 | 19.084 | 23.199 | -3.887  | 1.00 | 0.00 |
| ATOM | 121 | OD2  | ASP | A | 44 | 20.056 | 23.922 | -2.147  | 1.00 | 0.00 |
| ATOM | 122 | H    | ASP | A | 44 | 21.748 | 22.926 | -5.407  | 1.00 | 0.00 |

PEDF\_P1\_final\_docking\_model.txt

|      |     |     |     |   |    |        |        |        |      |      |
|------|-----|-----|-----|---|----|--------|--------|--------|------|------|
| ATOM | 123 | HA  | ASP | A | 44 | 19.490 | 24.575 | -5.941 | 1.00 | 0.00 |
| ATOM | 124 | 1HB | ASP | A | 44 | 21.648 | 24.999 | -3.806 | 1.00 | 0.00 |
| ATOM | 125 | 2HB | ASP | A | 44 | 20.172 | 25.939 | -4.138 | 1.00 | 0.00 |
| ATOM | 126 | N   | PRO | A | 45 | 20.464 | 26.454 | -7.364 | 1.00 | 0.00 |
| ATOM | 127 | CA  | PRO | A | 45 | 20.974 | 27.524 | -8.225 | 1.00 | 0.00 |
| ATOM | 128 | C   | PRO | A | 45 | 21.721 | 28.611 | -7.461 | 1.00 | 0.00 |
| ATOM | 129 | O   | PRO | A | 45 | 22.530 | 29.342 | -8.034 | 1.00 | 0.00 |
| ATOM | 130 | CB  | PRO | A | 45 | 19.714 | 28.075 | -8.901 | 1.00 | 0.00 |
| ATOM | 131 | CG  | PRO | A | 45 | 18.759 | 26.931 | -8.894 | 1.00 | 0.00 |
| ATOM | 132 | CD  | PRO | A | 45 | 18.994 | 26.222 | -7.587 | 1.00 | 0.00 |
| ATOM | 133 | HA  | PRO | A | 45 | 21.714 | 27.166 | -8.956 | 1.00 | 0.00 |
| ATOM | 134 | 1HB | PRO | A | 45 | 19.307 | 28.937 | -8.353 | 1.00 | 0.00 |
| ATOM | 135 | 2HB | PRO | A | 45 | 19.923 | 28.414 | -9.927 | 1.00 | 0.00 |
| ATOM | 136 | 1HG | PRO | A | 45 | 17.719 | 27.281 | -8.973 | 1.00 | 0.00 |
| ATOM | 137 | 2HG | PRO | A | 45 | 18.937 | 26.258 | -9.746 | 1.00 | 0.00 |
| ATOM | 138 | 1HD | PRO | A | 45 | 18.380 | 26.637 | -6.773 | 1.00 | 0.00 |
| ATOM | 139 | 2HD | PRO | A | 45 | 18.763 | 25.149 | -7.648 | 1.00 | 0.00 |
| ATOM | 140 | N   | PHE | A | 46 | 21.445 | 28.711 | -6.166 | 1.00 | 0.00 |
| ATOM | 141 | CA  | PHE | A | 46 | 22.072 | 29.723 | -5.329 | 1.00 | 0.00 |
| ATOM | 142 | C   | PHE | A | 46 | 23.569 | 29.460 | -5.145 | 1.00 | 0.00 |
| ATOM | 143 | O   | PHE | A | 46 | 24.395 | 30.380 | -5.213 | 1.00 | 0.00 |
| ATOM | 144 | CB  | PHE | A | 46 | 21.377 | 29.784 | -3.968 | 1.00 | 0.00 |
| ATOM | 145 | CG  | PHE | A | 46 | 21.960 | 30.807 | -3.035 | 1.00 | 0.00 |
| ATOM | 146 | CD1 | PHE | A | 46 | 21.660 | 32.153 | -3.184 | 1.00 | 0.00 |
| ATOM | 147 | CD2 | PHE | A | 46 | 22.810 | 30.427 | -2.008 | 1.00 | 0.00 |
| ATOM | 148 | CE1 | PHE | A | 46 | 22.197 | 33.096 | -2.326 | 1.00 | 0.00 |
| ATOM | 149 | CE2 | PHE | A | 46 | 23.347 | 31.366 | -1.149 | 1.00 | 0.00 |
| ATOM | 150 | CZ  | PHE | A | 46 | 23.039 | 32.702 | -1.309 | 1.00 | 0.00 |
| ATOM | 151 | H   | PHE | A | 46 | 20.784 | 28.070 | -5.751 | 1.00 | 0.00 |
| ATOM | 152 | HA  | PHE | A | 46 | 21.993 | 30.700 | -5.808 | 1.00 | 0.00 |
| ATOM | 153 | 1HB | PHE | A | 46 | 20.326 | 30.041 | -4.094 | 1.00 | 0.00 |
| ATOM | 154 | 2HB | PHE | A | 46 | 21.456 | 28.822 | -3.463 | 1.00 | 0.00 |
| ATOM | 155 | HD1 | PHE | A | 46 | 20.993 | 32.465 | -3.988 | 1.00 | 0.00 |
| ATOM | 156 | HD2 | PHE | A | 46 | 23.053 | 29.371 | -1.882 | 1.00 | 0.00 |
| ATOM | 157 | HE1 | PHE | A | 46 | 21.953 | 34.150 | -2.455 | 1.00 | 0.00 |
| ATOM | 158 | HE2 | PHE | A | 46 | 24.013 | 31.053 | -0.345 | 1.00 | 0.00 |
| ATOM | 159 | HZ  | PHE | A | 46 | 23.463 | 33.444 | -0.633 | 1.00 | 0.00 |
| ATOM | 160 | N   | PHE | A | 47 | 23.916 | 28.200 | -4.919 | 1.00 | 0.00 |
| ATOM | 161 | CA  | PHE | A | 47 | 25.304 | 27.839 | -4.710 | 1.00 | 0.00 |
| ATOM | 162 | C   | PHE | A | 47 | 26.034 | 27.536 | -6.002 | 1.00 | 0.00 |
| ATOM | 163 | O   | PHE | A | 47 | 27.246 | 27.334 | -5.992 | 1.00 | 0.00 |
| ATOM | 164 | CB  | PHE | A | 47 | 25.395 | 26.634 | -3.772 | 1.00 | 0.00 |
| ATOM | 165 | CG  | PHE | A | 47 | 24.762 | 26.864 | -2.428 | 1.00 | 0.00 |
| ATOM | 166 | CD1 | PHE | A | 47 | 23.491 | 26.383 | -2.153 | 1.00 | 0.00 |
| ATOM | 167 | CD2 | PHE | A | 47 | 25.437 | 27.560 | -1.437 | 1.00 | 0.00 |
| ATOM | 168 | CE1 | PHE | A | 47 | 22.908 | 26.594 | -0.918 | 1.00 | 0.00 |
| ATOM | 169 | CE2 | PHE | A | 47 | 24.858 | 27.771 | -0.201 | 1.00 | 0.00 |
| ATOM | 170 | CZ  | PHE | A | 47 | 23.591 | 27.287 | 0.058  | 1.00 | 0.00 |
| ATOM | 171 | H   | PHE | A | 47 | 23.210 | 27.478 | -4.891 | 1.00 | 0.00 |
| ATOM | 172 | HA  | PHE | A | 47 | 25.841 | 28.676 | -4.262 | 1.00 | 0.00 |
| ATOM | 173 | 1HB | PHE | A | 47 | 24.888 | 25.776 | -4.212 | 1.00 | 0.00 |
| ATOM | 174 | 2HB | PHE | A | 47 | 26.438 | 26.383 | -3.585 | 1.00 | 0.00 |
| ATOM | 175 | HD1 | PHE | A | 47 | 22.951 | 25.834 | -2.925 | 1.00 | 0.00 |
| ATOM | 176 | HD2 | PHE | A | 47 | 26.438 | 27.943 | -1.643 | 1.00 | 0.00 |
| ATOM | 177 | HE1 | PHE | A | 47 | 21.908 | 26.211 | -0.715 | 1.00 | 0.00 |
| ATOM | 178 | HE2 | PHE | A | 47 | 25.399 | 28.320 | 0.569  | 1.00 | 0.00 |
| ATOM | 179 | HZ  | PHE | A | 47 | 23.132 | 27.455 | 1.032  | 1.00 | 0.00 |
| ATOM | 180 | N   | LYS | A | 48 | 25.315 | 27.508 | -7.119 | 1.00 | 0.00 |
| ATOM | 181 | CA  | LYS | A | 48 | 25.978 | 27.232 | -8.389 | 1.00 | 0.00 |
| ATOM | 182 | C   | LYS | A | 48 | 26.828 | 28.448 | -8.797 | 1.00 | 0.00 |
| ATOM | 183 | O   | LYS | A | 48 | 27.791 | 28.329 | -9.560 | 1.00 | 0.00 |
| ATOM | 184 | CB  | LYS | A | 48 | 24.954 | 26.897 | -9.475 | 1.00 | 0.00 |
| ATOM | 185 | CG  | LYS | A | 48 | 24.252 | 25.559 | -9.286 | 1.00 | 0.00 |

PEDF\_P1\_final\_docking\_model.txt

|      |     |      |     |   |    |        |        |         |      |      |
|------|-----|------|-----|---|----|--------|--------|---------|------|------|
| ATOM | 186 | CD   | LYS | A | 48 | 23.208 | 25.325 | -10.368 | 1.00 | 0.00 |
| ATOM | 187 | CE   | LYS | A | 48 | 23.858 | 25.079 | -11.722 | 1.00 | 0.00 |
| ATOM | 188 | NZ   | LYS | A | 48 | 22.851 | 24.783 | -12.777 | 1.00 | 0.00 |
| ATOM | 189 | H    | LYS | A | 48 | 24.319 | 27.674 | -7.110  | 1.00 | 0.00 |
| ATOM | 190 | HA   | LYS | A | 48 | 26.652 | 26.382 | -8.276  | 1.00 | 0.00 |
| ATOM | 191 | 1HB  | LYS | A | 48 | 24.215 | 27.698 | -9.474  | 1.00 | 0.00 |
| ATOM | 192 | 2HB  | LYS | A | 48 | 25.486 | 26.896 | -10.427 | 1.00 | 0.00 |
| ATOM | 193 | 1HG  | LYS | A | 48 | 25.000 | 24.767 | -9.325  | 1.00 | 0.00 |
| ATOM | 194 | 2HG  | LYS | A | 48 | 23.770 | 25.556 | -8.309  | 1.00 | 0.00 |
| ATOM | 195 | 1HD  | LYS | A | 48 | 22.608 | 24.457 | -10.089 | 1.00 | 0.00 |
| ATOM | 196 | 2HD  | LYS | A | 48 | 22.567 | 26.204 | -10.428 | 1.00 | 0.00 |
| ATOM | 197 | 1HE  | LYS | A | 48 | 24.421 | 25.970 | -11.997 | 1.00 | 0.00 |
| ATOM | 198 | 2HE  | LYS | A | 48 | 24.540 | 24.235 | -11.625 | 1.00 | 0.00 |
| ATOM | 199 | 1HZ  | LYS | A | 48 | 23.322 | 24.627 | -13.657 | 1.00 | 0.00 |
| ATOM | 200 | 2HZ  | LYS | A | 48 | 22.329 | 23.956 | -12.522 | 1.00 | 0.00 |
| ATOM | 201 | 3HZ  | LYS | A | 48 | 22.219 | 25.565 | -12.868 | 1.00 | 0.00 |
| ATOM | 202 | N    | VAL | A | 49 | 26.471 | 29.614 | -8.267  | 1.00 | 0.00 |
| ATOM | 203 | CA   | VAL | A | 49 | 27.210 | 30.846 | -8.534  | 1.00 | 0.00 |
| ATOM | 204 | C    | VAL | A | 49 | 28.543 | 30.769 | -7.796  | 1.00 | 0.00 |
| ATOM | 205 | O    | VAL | A | 49 | 28.571 | 30.583 | -6.581  | 1.00 | 0.00 |
| ATOM | 206 | CB   | VAL | A | 49 | 26.438 | 32.102 | -8.089  | 1.00 | 0.00 |
| ATOM | 207 | CG1  | VAL | A | 49 | 27.283 | 33.349 | -8.300  | 1.00 | 0.00 |
| ATOM | 208 | CG2  | VAL | A | 49 | 25.124 | 32.216 | -8.848  | 1.00 | 0.00 |
| ATOM | 209 | H    | VAL | A | 49 | 25.663 | 29.646 | -7.661  | 1.00 | 0.00 |
| ATOM | 210 | HA   | VAL | A | 49 | 27.441 | 30.948 | -9.595  | 1.00 | 0.00 |
| ATOM | 211 | HB   | VAL | A | 49 | 26.186 | 32.008 | -7.033  | 1.00 | 0.00 |
| ATOM | 212 | 1HG1 | VAL | A | 49 | 26.721 | 34.228 | -7.980  | 1.00 | 0.00 |
| ATOM | 213 | 2HG1 | VAL | A | 49 | 28.198 | 33.272 | -7.714  | 1.00 | 0.00 |
| ATOM | 214 | 3HG1 | VAL | A | 49 | 27.534 | 33.445 | -9.356  | 1.00 | 0.00 |
| ATOM | 215 | 1HG2 | VAL | A | 49 | 24.591 | 33.109 | -8.521  | 1.00 | 0.00 |
| ATOM | 216 | 2HG2 | VAL | A | 49 | 25.327 | 32.285 | -9.917  | 1.00 | 0.00 |
| ATOM | 217 | 3HG2 | VAL | A | 49 | 24.512 | 31.336 | -8.650  | 1.00 | 0.00 |
| ATOM | 218 | N    | PRO | A | 50 | 29.664 | 30.945 | -8.503  | 1.00 | 0.00 |
| ATOM | 219 | CA   | PRO | A | 50 | 30.968 | 30.873 | -7.832  | 1.00 | 0.00 |
| ATOM | 220 | C    | PRO | A | 50 | 31.149 | 31.689 | -6.531  | 1.00 | 0.00 |
| ATOM | 221 | O    | PRO | A | 50 | 31.547 | 31.124 | -5.507  | 1.00 | 0.00 |
| ATOM | 222 | CB   | PRO | A | 50 | 31.921 | 31.366 | -8.925  | 1.00 | 0.00 |
| ATOM | 223 | CG   | PRO | A | 50 | 31.275 | 30.944 | -10.200 | 1.00 | 0.00 |
| ATOM | 224 | CD   | PRO | A | 50 | 29.804 | 31.201 | -10.006 | 1.00 | 0.00 |
| ATOM | 225 | HA   | PRO | A | 50 | 31.209 | 29.860 | -7.478  | 1.00 | 0.00 |
| ATOM | 226 | 1HB  | PRO | A | 50 | 32.050 | 32.458 | -8.886  | 1.00 | 0.00 |
| ATOM | 227 | 2HB  | PRO | A | 50 | 32.921 | 30.920 | -8.819  | 1.00 | 0.00 |
| ATOM | 228 | 1HG  | PRO | A | 50 | 31.667 | 31.516 | -11.054 | 1.00 | 0.00 |
| ATOM | 229 | 2HG  | PRO | A | 50 | 31.466 | 29.881 | -10.410 | 1.00 | 0.00 |
| ATOM | 230 | 1HD  | PRO | A | 50 | 29.521 | 32.226 | -10.287 | 1.00 | 0.00 |
| ATOM | 231 | 2HD  | PRO | A | 50 | 29.180 | 30.520 | -10.603 | 1.00 | 0.00 |
| ATOM | 232 | N    | VAL | A | 51 | 30.857 | 32.992 | -6.548  | 1.00 | 0.00 |
| ATOM | 233 | CA   | VAL | A | 51 | 31.020 | 33.811 | -5.341  | 1.00 | 0.00 |
| ATOM | 234 | C    | VAL | A | 51 | 30.172 | 33.319 | -4.163  | 1.00 | 0.00 |
| ATOM | 235 | O    | VAL | A | 51 | 30.604 | 33.389 | -3.014  | 1.00 | 0.00 |
| ATOM | 236 | CB   | VAL | A | 51 | 30.665 | 35.283 | -5.621  | 1.00 | 0.00 |
| ATOM | 237 | CG1  | VAL | A | 51 | 30.644 | 36.081 | -4.325  | 1.00 | 0.00 |
| ATOM | 238 | CG2  | VAL | A | 51 | 31.653 | 35.892 | -6.604  | 1.00 | 0.00 |
| ATOM | 239 | H    | VAL | A | 51 | 30.520 | 33.426 | -7.395  | 1.00 | 0.00 |
| ATOM | 240 | HA   | VAL | A | 51 | 32.041 | 33.760 | -4.962  | 1.00 | 0.00 |
| ATOM | 241 | HB   | VAL | A | 51 | 29.682 | 35.328 | -6.090  | 1.00 | 0.00 |
| ATOM | 242 | 1HG1 | VAL | A | 51 | 30.392 | 37.120 | -4.542  | 1.00 | 0.00 |
| ATOM | 243 | 2HG1 | VAL | A | 51 | 29.900 | 35.660 | -3.650  | 1.00 | 0.00 |
| ATOM | 244 | 3HG1 | VAL | A | 51 | 31.627 | 36.039 | -3.856  | 1.00 | 0.00 |
| ATOM | 245 | 1HG2 | VAL | A | 51 | 31.387 | 36.932 | -6.791  | 1.00 | 0.00 |
| ATOM | 246 | 2HG2 | VAL | A | 51 | 32.658 | 35.844 | -6.186  | 1.00 | 0.00 |
| ATOM | 247 | 3HG2 | VAL | A | 51 | 31.622 | 35.337 | -7.542  | 1.00 | 0.00 |
| ATOM | 248 | N    | ASN | A | 52 | 28.964 | 32.834 | -4.442  | 1.00 | 0.00 |

PEDF\_P1\_final\_docking\_model.txt

|      |     |      |     |   |    |        |        |        |      |      |
|------|-----|------|-----|---|----|--------|--------|--------|------|------|
| ATOM | 249 | CA   | ASN | A | 52 | 28.083 | 32.334 | -3.390 | 1.00 | 0.00 |
| ATOM | 250 | C    | ASN | A | 52 | 28.616 | 31.022 | -2.841 | 1.00 | 0.00 |
| ATOM | 251 | O    | ASN | A | 52 | 28.512 | 30.747 | -1.652 | 1.00 | 0.00 |
| ATOM | 252 | CB   | ASN | A | 52 | 26.657 | 32.162 | -3.881 | 1.00 | 0.00 |
| ATOM | 253 | CG   | ASN | A | 52 | 25.987 | 33.453 | -4.259 | 1.00 | 0.00 |
| ATOM | 254 | OD1  | ASN | A | 52 | 26.513 | 34.545 | -4.012 | 1.00 | 0.00 |
| ATOM | 255 | ND2  | ASN | A | 52 | 24.793 | 33.338 | -4.783 | 1.00 | 0.00 |
| ATOM | 256 | H    | ASN | A | 52 | 28.648 | 32.810 | -5.401 | 1.00 | 0.00 |
| ATOM | 257 | HA   | ASN | A | 52 | 28.057 | 33.043 | -2.561 | 1.00 | 0.00 |
| ATOM | 258 | 1HB  | ASN | A | 52 | 26.411 | 31.400 | -4.622 | 1.00 | 0.00 |
| ATOM | 259 | 2HB  | ASN | A | 52 | 26.291 | 31.849 | -2.904 | 1.00 | 0.00 |
| ATOM | 260 | 1HD2 | ASN | A | 52 | 24.288 | 34.156 | -5.059 | 1.00 | 0.00 |
| ATOM | 261 | 2HD2 | ASN | A | 52 | 24.387 | 32.433 | -4.907 | 1.00 | 0.00 |
| ATOM | 262 | N    | LYS | A | 53 | 29.176 | 30.216 | -3.737 | 1.00 | 0.00 |
| ATOM | 263 | CA   | LYS | A | 53 | 29.755 | 28.921 | -3.399 | 1.00 | 0.00 |
| ATOM | 264 | C    | LYS | A | 53 | 30.924 | 29.123 | -2.444 | 1.00 | 0.00 |
| ATOM | 265 | O    | LYS | A | 53 | 31.089 | 28.387 | -1.469 | 1.00 | 0.00 |
| ATOM | 266 | CB   | LYS | A | 53 | 30.211 | 28.179 | -4.656 | 1.00 | 0.00 |
| ATOM | 267 | CG   | LYS | A | 53 | 30.584 | 26.721 | -4.425 | 1.00 | 0.00 |
| ATOM | 268 | CD   | LYS | A | 53 | 30.675 | 25.958 | -5.739 | 1.00 | 0.00 |
| ATOM | 269 | CE   | LYS | A | 53 | 31.081 | 24.509 | -5.511 | 1.00 | 0.00 |
| ATOM | 270 | NZ   | LYS | A | 53 | 31.194 | 23.756 | -6.790 | 1.00 | 0.00 |
| ATOM | 271 | H    | LYS | A | 53 | 29.195 | 30.528 | -4.697 | 1.00 | 0.00 |
| ATOM | 272 | HA   | LYS | A | 53 | 29.013 | 28.307 | -2.888 | 1.00 | 0.00 |
| ATOM | 273 | 1HB  | LYS | A | 53 | 29.392 | 28.234 | -5.374 | 1.00 | 0.00 |
| ATOM | 274 | 2HB  | LYS | A | 53 | 31.074 | 28.716 | -5.049 | 1.00 | 0.00 |
| ATOM | 275 | 1HG  | LYS | A | 53 | 31.549 | 26.686 | -3.917 | 1.00 | 0.00 |
| ATOM | 276 | 2HG  | LYS | A | 53 | 29.824 | 26.265 | -3.792 | 1.00 | 0.00 |
| ATOM | 277 | 1HD  | LYS | A | 53 | 29.700 | 25.990 | -6.227 | 1.00 | 0.00 |
| ATOM | 278 | 2HD  | LYS | A | 53 | 31.414 | 26.446 | -6.374 | 1.00 | 0.00 |
| ATOM | 279 | 1HE  | LYS | A | 53 | 32.041 | 24.500 | -4.998 | 1.00 | 0.00 |
| ATOM | 280 | 2HE  | LYS | A | 53 | 30.328 | 24.039 | -4.879 | 1.00 | 0.00 |
| ATOM | 281 | 1HZ  | LYS | A | 53 | 31.464 | 22.802 | -6.595 | 1.00 | 0.00 |
| ATOM | 282 | 2HZ  | LYS | A | 53 | 30.303 | 23.763 | -7.266 | 1.00 | 0.00 |
| ATOM | 283 | 3HZ  | LYS | A | 53 | 31.892 | 24.191 | -7.376 | 1.00 | 0.00 |
| ATOM | 284 | N    | LEU | A | 54 | 31.746 | 30.124 | -2.745 | 1.00 | 0.00 |
| ATOM | 285 | CA   | LEU | A | 54 | 32.896 | 30.432 | -1.914 | 1.00 | 0.00 |
| ATOM | 286 | C    | LEU | A | 54 | 32.419 | 30.967 | -0.565 | 1.00 | 0.00 |
| ATOM | 287 | O    | LEU | A | 54 | 32.999 | 30.654 | 0.473  | 1.00 | 0.00 |
| ATOM | 288 | CB   | LEU | A | 54 | 33.811 | 31.445 | -2.614 | 1.00 | 0.00 |
| ATOM | 289 | CG   | LEU | A | 54 | 35.088 | 31.811 | -1.846 | 1.00 | 0.00 |
| ATOM | 290 | CD1  | LEU | A | 54 | 35.939 | 30.568 | -1.627 | 1.00 | 0.00 |
| ATOM | 291 | CD2  | LEU | A | 54 | 35.863 | 32.866 | -2.621 | 1.00 | 0.00 |
| ATOM | 292 | H    | LEU | A | 54 | 31.569 | 30.683 | -3.567 | 1.00 | 0.00 |
| ATOM | 293 | HA   | LEU | A | 54 | 33.463 | 29.522 | -1.724 | 1.00 | 0.00 |
| ATOM | 294 | 1HB  | LEU | A | 54 | 34.062 | 30.871 | -3.504 | 1.00 | 0.00 |
| ATOM | 295 | 2HB  | LEU | A | 54 | 33.269 | 32.346 | -2.902 | 1.00 | 0.00 |
| ATOM | 296 | HG   | LEU | A | 54 | 34.780 | 32.252 | -0.898 | 1.00 | 0.00 |
| ATOM | 297 | 1HD1 | LEU | A | 54 | 36.844 | 30.837 | -1.081 | 1.00 | 0.00 |
| ATOM | 298 | 2HD1 | LEU | A | 54 | 35.373 | 29.836 | -1.051 | 1.00 | 0.00 |
| ATOM | 299 | 3HD1 | LEU | A | 54 | 36.212 | 30.139 | -2.591 | 1.00 | 0.00 |
| ATOM | 300 | 1HD2 | LEU | A | 54 | 36.770 | 33.125 | -2.074 | 1.00 | 0.00 |
| ATOM | 301 | 2HD2 | LEU | A | 54 | 36.130 | 32.474 | -3.603 | 1.00 | 0.00 |
| ATOM | 302 | 3HD2 | LEU | A | 54 | 35.245 | 33.756 | -2.742 | 1.00 | 0.00 |
| ATOM | 303 | N    | ALA | A | 55 | 31.355 | 31.762 | -0.582 | 1.00 | 0.00 |
| ATOM | 304 | CA   | ALA | A | 55 | 30.818 | 32.314 | 0.656  | 1.00 | 0.00 |
| ATOM | 305 | C    | ALA | A | 55 | 30.268 | 31.204 | 1.562  | 1.00 | 0.00 |
| ATOM | 306 | O    | ALA | A | 55 | 30.350 | 31.297 | 2.787  | 1.00 | 0.00 |
| ATOM | 307 | CB   | ALA | A | 55 | 29.692 | 33.305 | 0.358  | 1.00 | 0.00 |
| ATOM | 308 | H    | ALA | A | 55 | 30.907 | 31.991 | -1.458 | 1.00 | 0.00 |
| ATOM | 309 | HA   | ALA | A | 55 | 31.625 | 32.806 | 1.199  | 1.00 | 0.00 |
| ATOM | 310 | 1HB  | ALA | A | 55 | 29.304 | 33.706 | 1.295  | 1.00 | 0.00 |
| ATOM | 311 | 2HB  | ALA | A | 55 | 30.077 | 34.121 | -0.254 | 1.00 | 0.00 |

PEDF\_P1\_final\_docking\_model.txt

|      |     |      |     |   |    |        |        |        |      |      |
|------|-----|------|-----|---|----|--------|--------|--------|------|------|
| ATOM | 312 | 3HB  | ALA | A | 55 | 28.892 | 32.796 | -0.177 | 1.00 | 0.00 |
| ATOM | 313 | N    | ALA | A | 56 | 29.716 | 30.155 | 0.964  | 1.00 | 0.00 |
| ATOM | 314 | CA   | ALA | A | 56 | 29.180 | 29.049 | 1.753  | 1.00 | 0.00 |
| ATOM | 315 | C    | ALA | A | 56 | 30.294 | 28.306 | 2.485  | 1.00 | 0.00 |
| ATOM | 316 | O    | ALA | A | 56 | 30.113 | 27.877 | 3.616  | 1.00 | 0.00 |
| ATOM | 317 | CB   | ALA | A | 56 | 28.448 | 28.059 | 0.847  | 1.00 | 0.00 |
| ATOM | 318 | H    | ALA | A | 56 | 29.662 | 30.112 | -0.044 | 1.00 | 0.00 |
| ATOM | 319 | HA   | ALA | A | 56 | 28.506 | 29.453 | 2.509  | 1.00 | 0.00 |
| ATOM | 320 | 1HB  | ALA | A | 56 | 28.054 | 27.240 | 1.449  | 1.00 | 0.00 |
| ATOM | 321 | 2HB  | ALA | A | 56 | 27.626 | 28.566 | 0.342  | 1.00 | 0.00 |
| ATOM | 322 | 3HB  | ALA | A | 56 | 29.141 | 27.663 | 0.106  | 1.00 | 0.00 |
| ATOM | 323 | N    | ALA | A | 57 | 31.447 | 28.164 | 1.837  | 1.00 | 0.00 |
| ATOM | 324 | CA   | ALA | A | 57 | 32.591 | 27.470 | 2.424  | 1.00 | 0.00 |
| ATOM | 325 | C    | ALA | A | 57 | 33.117 | 28.263 | 3.600  | 1.00 | 0.00 |
| ATOM | 326 | O    | ALA | A | 57 | 33.152 | 27.785 | 4.730  | 1.00 | 0.00 |
| ATOM | 327 | CB   | ALA | A | 57 | 33.676 | 27.313 | 1.361  | 1.00 | 0.00 |
| ATOM | 328 | H    | ALA | A | 57 | 31.530 | 28.551 | 0.908  | 1.00 | 0.00 |
| ATOM | 329 | HA   | ALA | A | 57 | 32.261 | 26.496 | 2.785  | 1.00 | 0.00 |
| ATOM | 330 | 1HB  | ALA | A | 57 | 34.533 | 26.796 | 1.791  | 1.00 | 0.00 |
| ATOM | 331 | 2HB  | ALA | A | 57 | 33.285 | 26.733 | 0.524  | 1.00 | 0.00 |
| ATOM | 332 | 3HB  | ALA | A | 57 | 33.985 | 28.296 | 1.009  | 1.00 | 0.00 |
| ATOM | 333 | N    | VAL | A | 58 | 33.531 | 29.487 | 3.315  | 1.00 | 0.00 |
| ATOM | 334 | CA   | VAL | A | 58 | 34.055 | 30.380 | 4.330  | 1.00 | 0.00 |
| ATOM | 335 | C    | VAL | A | 58 | 33.054 | 30.506 | 5.484  | 1.00 | 0.00 |
| ATOM | 336 | O    | VAL | A | 58 | 33.433 | 30.511 | 6.657  | 1.00 | 0.00 |
| ATOM | 337 | CB   | VAL | A | 58 | 34.309 | 31.736 | 3.668  | 1.00 | 0.00 |
| ATOM | 338 | CG1  | VAL | A | 58 | 34.496 | 32.867 | 4.677  | 1.00 | 0.00 |
| ATOM | 339 | CG2  | VAL | A | 58 | 35.473 | 31.624 | 2.684  | 1.00 | 0.00 |
| ATOM | 340 | H    | VAL | A | 58 | 33.479 | 29.806 | 2.358  | 1.00 | 0.00 |
| ATOM | 341 | HA   | VAL | A | 58 | 34.967 | 29.981 | 4.777  | 1.00 | 0.00 |
| ATOM | 342 | HB   | VAL | A | 58 | 33.427 | 32.020 | 3.093  | 1.00 | 0.00 |
| ATOM | 343 | 1HG1 | VAL | A | 58 | 34.672 | 33.803 | 4.146  | 1.00 | 0.00 |
| ATOM | 344 | 2HG1 | VAL | A | 58 | 33.599 | 32.961 | 5.289  | 1.00 | 0.00 |
| ATOM | 345 | 3HG1 | VAL | A | 58 | 35.351 | 32.647 | 5.316  | 1.00 | 0.00 |
| ATOM | 346 | 1HG2 | VAL | A | 58 | 35.649 | 32.592 | 2.215  | 1.00 | 0.00 |
| ATOM | 347 | 2HG2 | VAL | A | 58 | 36.370 | 31.310 | 3.218  | 1.00 | 0.00 |
| ATOM | 348 | 3HG2 | VAL | A | 58 | 35.231 | 30.889 | 1.916  | 1.00 | 0.00 |
| ATOM | 349 | N    | SER | A | 59 | 31.772 | 30.592 | 5.150  | 1.00 | 0.00 |
| ATOM | 350 | CA   | SER | A | 59 | 30.758 | 30.714 | 6.178  | 1.00 | 0.00 |
| ATOM | 351 | C    | SER | A | 59 | 30.668 | 29.448 | 7.016  | 1.00 | 0.00 |
| ATOM | 352 | O    | SER | A | 59 | 30.475 | 29.537 | 8.231  | 1.00 | 0.00 |
| ATOM | 353 | CB   | SER | A | 59 | 29.415 | 31.030 | 5.548  | 1.00 | 0.00 |
| ATOM | 354 | OG   | SER | A | 59 | 29.405 | 32.290 | 4.935  | 1.00 | 0.00 |
| ATOM | 355 | H    | SER | A | 59 | 31.490 | 30.573 | 4.180  | 1.00 | 0.00 |
| ATOM | 356 | HA   | SER | A | 59 | 30.902 | 31.578 | 6.828  | 1.00 | 0.00 |
| ATOM | 357 | 1HB  | SER | A | 59 | 29.195 | 30.270 | 4.799  | 1.00 | 0.00 |
| ATOM | 358 | 2HB  | SER | A | 59 | 28.651 | 31.006 | 6.324  | 1.00 | 0.00 |
| ATOM | 359 | HG   | SER | A | 59 | 30.073 | 32.316 | 4.246  | 1.00 | 0.00 |
| ATOM | 360 | N    | ASN | A | 60 | 30.810 | 28.280 | 6.379  | 1.00 | 0.00 |
| ATOM | 361 | CA   | ASN | A | 60 | 30.765 | 27.006 | 7.101  | 1.00 | 0.00 |
| ATOM | 362 | C    | ASN | A | 60 | 31.960 | 26.912 | 8.048  | 1.00 | 0.00 |
| ATOM | 363 | O    | ASN | A | 60 | 31.920 | 26.206 | 9.056  | 1.00 | 0.00 |
| ATOM | 364 | CB   | ASN | A | 60 | 30.738 | 25.819 | 6.156  | 1.00 | 0.00 |
| ATOM | 365 | CG   | ASN | A | 60 | 29.424 | 25.639 | 5.448  | 1.00 | 0.00 |
| ATOM | 366 | OD1  | ASN | A | 60 | 28.384 | 26.142 | 5.888  | 1.00 | 0.00 |
| ATOM | 367 | ND2  | ASN | A | 60 | 29.450 | 24.858 | 4.398  | 1.00 | 0.00 |
| ATOM | 368 | H    | ASN | A | 60 | 30.951 | 28.274 | 5.379  | 1.00 | 0.00 |
| ATOM | 369 | HA   | ASN | A | 60 | 29.860 | 26.957 | 7.709  | 1.00 | 0.00 |
| ATOM | 370 | 1HB  | ASN | A | 60 | 31.551 | 25.648 | 5.450  | 1.00 | 0.00 |
| ATOM | 371 | 2HB  | ASN | A | 60 | 30.802 | 25.092 | 6.966  | 1.00 | 0.00 |
| ATOM | 372 | 1HD2 | ASN | A | 60 | 28.613 | 24.693 | 3.877  | 1.00 | 0.00 |
| ATOM | 373 | 2HD2 | ASN | A | 60 | 30.307 | 24.427 | 4.117  | 1.00 | 0.00 |
| ATOM | 374 | N    | PHE | A | 61 | 33.034 | 27.614 | 7.707  | 1.00 | 0.00 |

PEDF\_P1\_final\_docking\_model.txt

|      |     |     |     |   |    |        |        |        |      |      |
|------|-----|-----|-----|---|----|--------|--------|--------|------|------|
| ATOM | 375 | CA  | PHE | A | 61 | 34.204 | 27.652 | 8.560  | 1.00 | 0.00 |
| ATOM | 376 | C   | PHE | A | 61 | 33.793 | 28.495 | 9.756  | 1.00 | 0.00 |
| ATOM | 377 | O   | PHE | A | 61 | 34.148 | 28.196 | 10.885 | 1.00 | 0.00 |
| ATOM | 378 | CB  | PHE | A | 61 | 35.385 | 28.266 | 7.801  | 1.00 | 0.00 |
| ATOM | 379 | CG  | PHE | A | 61 | 36.445 | 28.749 | 8.762  | 1.00 | 0.00 |
| ATOM | 380 | CD1 | PHE | A | 61 | 37.360 | 27.854 | 9.303  | 1.00 | 0.00 |
| ATOM | 381 | CD2 | PHE | A | 61 | 36.502 | 30.094 | 9.109  | 1.00 | 0.00 |
| ATOM | 382 | CE1 | PHE | A | 61 | 38.317 | 28.304 | 10.204 | 1.00 | 0.00 |
| ATOM | 383 | CE2 | PHE | A | 61 | 37.455 | 30.543 | 10.015 | 1.00 | 0.00 |
| ATOM | 384 | CZ  | PHE | A | 61 | 38.356 | 29.644 | 10.570 | 1.00 | 0.00 |
| ATOM | 385 | H   | PHE | A | 61 | 33.040 | 28.132 | 6.840  | 1.00 | 0.00 |
| ATOM | 386 | HA  | PHE | A | 61 | 34.462 | 26.641 | 8.879  | 1.00 | 0.00 |
| ATOM | 387 | 1HB | PHE | A | 61 | 35.835 | 27.524 | 7.143  | 1.00 | 0.00 |
| ATOM | 388 | 2HB | PHE | A | 61 | 35.048 | 29.117 | 7.210  | 1.00 | 0.00 |
| ATOM | 389 | HD1 | PHE | A | 61 | 37.315 | 26.805 | 9.011  | 1.00 | 0.00 |
| ATOM | 390 | HD2 | PHE | A | 61 | 35.792 | 30.797 | 8.671  | 1.00 | 0.00 |
| ATOM | 391 | HE1 | PHE | A | 61 | 39.039 | 27.605 | 10.625 | 1.00 | 0.00 |
| ATOM | 392 | HE2 | PHE | A | 61 | 37.497 | 31.596 | 10.291 | 1.00 | 0.00 |
| ATOM | 393 | HZ  | PHE | A | 61 | 39.092 | 29.991 | 11.294 | 1.00 | 0.00 |
| ATOM | 394 | N   | GLY | A | 62 | 33.049 | 29.565 | 9.489  | 1.00 | 0.00 |
| ATOM | 395 | CA  | GLY | A | 62 | 32.581 | 30.437 | 10.551 | 1.00 | 0.00 |
| ATOM | 396 | C   | GLY | A | 62 | 31.756 | 29.670 | 11.569 | 1.00 | 0.00 |
| ATOM | 397 | O   | GLY | A | 62 | 31.954 | 29.809 | 12.778 | 1.00 | 0.00 |
| ATOM | 398 | H   | GLY | A | 62 | 32.803 | 29.778 | 8.533  | 1.00 | 0.00 |
| ATOM | 399 | 1HA | GLY | A | 62 | 33.441 | 30.880 | 11.053 | 1.00 | 0.00 |
| ATOM | 400 | 2HA | GLY | A | 62 | 31.967 | 31.226 | 10.119 | 1.00 | 0.00 |
| ATOM | 401 | N   | TYR | A | 63 | 30.831 | 28.848 | 11.081 | 1.00 | 0.00 |
| ATOM | 402 | CA  | TYR | A | 63 | 29.974 | 28.058 | 11.957 | 1.00 | 0.00 |
| ATOM | 403 | C   | TYR | A | 63 | 30.784 | 27.089 | 12.803 | 1.00 | 0.00 |
| ATOM | 404 | O   | TYR | A | 63 | 30.492 | 26.915 | 13.990 | 1.00 | 0.00 |
| ATOM | 405 | CB  | TYR | A | 63 | 28.934 | 27.291 | 11.137 | 1.00 | 0.00 |
| ATOM | 406 | CG  | TYR | A | 63 | 27.817 | 28.158 | 10.599 | 1.00 | 0.00 |
| ATOM | 407 | CD1 | TYR | A | 63 | 27.538 | 28.200 | 9.241  | 1.00 | 0.00 |
| ATOM | 408 | CD2 | TYR | A | 63 | 27.043 | 28.931 | 11.452 | 1.00 | 0.00 |
| ATOM | 409 | CE1 | TYR | A | 63 | 26.520 | 28.990 | 8.744  | 1.00 | 0.00 |
| ATOM | 410 | CE2 | TYR | A | 63 | 26.021 | 29.724 | 10.967 | 1.00 | 0.00 |
| ATOM | 411 | CZ  | TYR | A | 63 | 25.763 | 29.751 | 9.612  | 1.00 | 0.00 |
| ATOM | 412 | OH  | TYR | A | 63 | 24.746 | 30.539 | 9.124  | 1.00 | 0.00 |
| ATOM | 413 | H   | TYR | A | 63 | 30.719 | 28.768 | 10.080 | 1.00 | 0.00 |
| ATOM | 414 | HA  | TYR | A | 63 | 29.453 | 28.714 | 12.655 | 1.00 | 0.00 |
| ATOM | 415 | 1HB | TYR | A | 63 | 29.461 | 26.820 | 10.306 | 1.00 | 0.00 |
| ATOM | 416 | 2HB | TYR | A | 63 | 28.516 | 26.521 | 11.786 | 1.00 | 0.00 |
| ATOM | 417 | HD1 | TYR | A | 63 | 28.140 | 27.596 | 8.562  | 1.00 | 0.00 |
| ATOM | 418 | HD2 | TYR | A | 63 | 27.253 | 28.905 | 12.522 | 1.00 | 0.00 |
| ATOM | 419 | HE1 | TYR | A | 63 | 26.312 | 29.013 | 7.675  | 1.00 | 0.00 |
| ATOM | 420 | HE2 | TYR | A | 63 | 25.425 | 30.325 | 11.654 | 1.00 | 0.00 |
| ATOM | 421 | HH  | TYR | A | 63 | 24.835 | 30.729 | 8.187  | 1.00 | 0.00 |
| ATOM | 422 | N   | ASP | A | 64 | 31.800 | 26.462 | 12.210 | 1.00 | 0.00 |
| ATOM | 423 | CA  | ASP | A | 64 | 32.626 | 25.539 | 12.974 | 1.00 | 0.00 |
| ATOM | 424 | C   | ASP | A | 64 | 33.280 | 26.295 | 14.117 | 1.00 | 0.00 |
| ATOM | 425 | O   | ASP | A | 64 | 33.279 | 25.829 | 15.256 | 1.00 | 0.00 |
| ATOM | 426 | CB  | ASP | A | 64 | 33.685 | 24.880 | 12.087 | 1.00 | 0.00 |
| ATOM | 427 | CG  | ASP | A | 64 | 33.168 | 23.722 | 11.244 | 1.00 | 0.00 |
| ATOM | 428 | OD1 | ASP | A | 64 | 32.474 | 22.889 | 11.777 | 1.00 | 0.00 |
| ATOM | 429 | OD2 | ASP | A | 64 | 33.338 | 23.762 | 10.049 | 1.00 | 0.00 |
| ATOM | 430 | H   | ASP | A | 64 | 32.009 | 26.617 | 11.234 | 1.00 | 0.00 |
| ATOM | 431 | HA  | ASP | A | 64 | 32.003 | 24.754 | 13.403 | 1.00 | 0.00 |
| ATOM | 432 | 1HB | ASP | A | 64 | 34.216 | 25.585 | 11.448 | 1.00 | 0.00 |
| ATOM | 433 | 2HB | ASP | A | 64 | 34.364 | 24.498 | 12.851 | 1.00 | 0.00 |
| ATOM | 434 | N   | LEU | A | 65 | 33.831 | 27.467 | 13.807 | 1.00 | 0.00 |
| ATOM | 435 | CA  | LEU | A | 65 | 34.494 | 28.276 | 14.812 | 1.00 | 0.00 |
| ATOM | 436 | C   | LEU | A | 65 | 33.514 | 28.636 | 15.915 | 1.00 | 0.00 |
| ATOM | 437 | O   | LEU | A | 65 | 33.827 | 28.505 | 17.096 | 1.00 | 0.00 |

PEDF\_P1\_final\_docking\_model.txt

|      |     |      |     |   |    |        |        |        |      |      |
|------|-----|------|-----|---|----|--------|--------|--------|------|------|
| ATOM | 438 | CB   | LEU | A | 65 | 35.088 | 29.541 | 14.179 | 1.00 | 0.00 |
| ATOM | 439 | CG   | LEU | A | 65 | 35.811 | 30.480 | 15.153 | 1.00 | 0.00 |
| ATOM | 440 | CD1  | LEU | A | 65 | 36.996 | 29.764 | 15.786 | 1.00 | 0.00 |
| ATOM | 441 | CD2  | LEU | A | 65 | 36.268 | 31.727 | 14.411 | 1.00 | 0.00 |
| ATOM | 442 | H    | LEU | A | 65 | 33.788 | 27.802 | 12.855 | 1.00 | 0.00 |
| ATOM | 443 | HA   | LEU | A | 65 | 35.299 | 27.702 | 15.270 | 1.00 | 0.00 |
| ATOM | 444 | 1HB  | LEU | A | 65 | 35.805 | 29.080 | 13.502 | 1.00 | 0.00 |
| ATOM | 445 | 2HB  | LEU | A | 65 | 34.344 | 30.090 | 13.601 | 1.00 | 0.00 |
| ATOM | 446 | HG   | LEU | A | 65 | 35.085 | 30.788 | 15.906 | 1.00 | 0.00 |
| ATOM | 447 | 1HD1 | LEU | A | 65 | 37.503 | 30.439 | 16.476 | 1.00 | 0.00 |
| ATOM | 448 | 2HD1 | LEU | A | 65 | 36.643 | 28.888 | 16.331 | 1.00 | 0.00 |
| ATOM | 449 | 3HD1 | LEU | A | 65 | 37.691 | 29.452 | 15.008 | 1.00 | 0.00 |
| ATOM | 450 | 1HD2 | LEU | A | 65 | 36.781 | 32.395 | 15.104 | 1.00 | 0.00 |
| ATOM | 451 | 2HD2 | LEU | A | 65 | 36.949 | 31.445 | 13.607 | 1.00 | 0.00 |
| ATOM | 452 | 3HD2 | LEU | A | 65 | 35.403 | 32.239 | 13.989 | 1.00 | 0.00 |
| ATOM | 453 | N    | TYR | A | 66 | 32.325 | 29.087 | 15.535 | 1.00 | 0.00 |
| ATOM | 454 | CA   | TYR | A | 66 | 31.316 | 29.445 | 16.525 | 1.00 | 0.00 |
| ATOM | 455 | C    | TYR | A | 66 | 31.026 | 28.263 | 17.450 | 1.00 | 0.00 |
| ATOM | 456 | O    | TYR | A | 66 | 30.992 | 28.412 | 18.676 | 1.00 | 0.00 |
| ATOM | 457 | CB   | TYR | A | 66 | 30.030 | 29.909 | 15.838 | 1.00 | 0.00 |
| ATOM | 458 | CG   | TYR | A | 66 | 28.847 | 30.037 | 16.773 | 1.00 | 0.00 |
| ATOM | 459 | CD1  | TYR | A | 66 | 28.701 | 31.151 | 17.587 | 1.00 | 0.00 |
| ATOM | 460 | CD2  | TYR | A | 66 | 27.880 | 29.046 | 16.836 | 1.00 | 0.00 |
| ATOM | 461 | CE1  | TYR | A | 66 | 27.623 | 31.273 | 18.443 | 1.00 | 0.00 |
| ATOM | 462 | CE2  | TYR | A | 66 | 26.798 | 29.157 | 17.688 | 1.00 | 0.00 |
| ATOM | 463 | CZ   | TYR | A | 66 | 26.673 | 30.273 | 18.490 | 1.00 | 0.00 |
| ATOM | 464 | OH   | TYR | A | 66 | 25.597 | 30.390 | 19.339 | 1.00 | 0.00 |
| ATOM | 465 | H    | TYR | A | 66 | 32.108 | 29.186 | 14.554 | 1.00 | 0.00 |
| ATOM | 466 | HA   | TYR | A | 66 | 31.685 | 30.256 | 17.154 | 1.00 | 0.00 |
| ATOM | 467 | 1HB  | TYR | A | 66 | 30.239 | 30.877 | 15.381 | 1.00 | 0.00 |
| ATOM | 468 | 2HB  | TYR | A | 66 | 29.800 | 29.182 | 15.060 | 1.00 | 0.00 |
| ATOM | 469 | HD1  | TYR | A | 66 | 29.455 | 31.936 | 17.545 | 1.00 | 0.00 |
| ATOM | 470 | HD2  | TYR | A | 66 | 27.985 | 28.167 | 16.200 | 1.00 | 0.00 |
| ATOM | 471 | HE1  | TYR | A | 66 | 27.521 | 32.153 | 19.078 | 1.00 | 0.00 |
| ATOM | 472 | HE2  | TYR | A | 66 | 26.049 | 28.366 | 17.724 | 1.00 | 0.00 |
| ATOM | 473 | HH   | TYR | A | 66 | 25.173 | 29.548 | 19.526 | 1.00 | 0.00 |
| ATOM | 474 | N    | ARG | A | 67 | 30.807 | 27.091 | 16.863 | 1.00 | 0.00 |
| ATOM | 475 | CA   | ARG | A | 67 | 30.512 | 25.909 | 17.656 | 1.00 | 0.00 |
| ATOM | 476 | C    | ARG | A | 67 | 31.641 | 25.578 | 18.625 | 1.00 | 0.00 |
| ATOM | 477 | O    | ARG | A | 67 | 31.387 | 25.182 | 19.764 | 1.00 | 0.00 |
| ATOM | 478 | CB   | ARG | A | 67 | 30.163 | 24.713 | 16.782 | 1.00 | 0.00 |
| ATOM | 479 | CG   | ARG | A | 67 | 28.732 | 24.692 | 16.270 | 1.00 | 0.00 |
| ATOM | 480 | CD   | ARG | A | 67 | 28.318 | 23.401 | 15.663 | 1.00 | 0.00 |
| ATOM | 481 | NE   | ARG | A | 67 | 29.040 | 23.045 | 14.452 | 1.00 | 0.00 |
| ATOM | 482 | CZ   | ARG | A | 67 | 28.594 | 23.270 | 13.201 | 1.00 | 0.00 |
| ATOM | 483 | NH1  | ARG | A | 67 | 27.415 | 23.814 | 12.990 | 1.00 | 0.00 |
| ATOM | 484 | NH2  | ARG | A | 67 | 29.362 | 22.908 | 12.189 | 1.00 | 0.00 |
| ATOM | 485 | H    | ARG | A | 67 | 30.844 | 27.012 | 15.857 | 1.00 | 0.00 |
| ATOM | 486 | HA   | ARG | A | 67 | 29.630 | 26.088 | 18.271 | 1.00 | 0.00 |
| ATOM | 487 | 1HB  | ARG | A | 67 | 30.848 | 24.727 | 15.935 | 1.00 | 0.00 |
| ATOM | 488 | 2HB  | ARG | A | 67 | 30.343 | 23.820 | 17.380 | 1.00 | 0.00 |
| ATOM | 489 | 1HG  | ARG | A | 67 | 28.061 | 24.900 | 17.104 | 1.00 | 0.00 |
| ATOM | 490 | 2HG  | ARG | A | 67 | 28.623 | 25.469 | 15.513 | 1.00 | 0.00 |
| ATOM | 491 | 1HD  | ARG | A | 67 | 28.480 | 22.601 | 16.386 | 1.00 | 0.00 |
| ATOM | 492 | 2HD  | ARG | A | 67 | 27.260 | 23.452 | 15.409 | 1.00 | 0.00 |
| ATOM | 493 | HE   | ARG | A | 67 | 29.941 | 22.598 | 14.347 | 1.00 | 0.00 |
| ATOM | 494 | 1HH1 | ARG | A | 67 | 26.832 | 24.069 | 13.774 | 1.00 | 0.00 |
| ATOM | 495 | 2HH1 | ARG | A | 67 | 27.099 | 23.974 | 12.045 | 1.00 | 0.00 |
| ATOM | 496 | 1HH2 | ARG | A | 67 | 30.258 | 22.475 | 12.369 | 1.00 | 0.00 |
| ATOM | 497 | 2HH2 | ARG | A | 67 | 29.052 | 23.064 | 11.241 | 1.00 | 0.00 |
| ATOM | 498 | N    | VAL | A | 68 | 32.884 | 25.731 | 18.181 | 1.00 | 0.00 |
| ATOM | 499 | CA   | VAL | A | 68 | 34.024 | 25.449 | 19.048 | 1.00 | 0.00 |
| ATOM | 500 | C    | VAL | A | 68 | 34.091 | 26.481 | 20.177 | 1.00 | 0.00 |



PEDF\_P1\_final\_docking\_model.txt

|      |     |      |     |   |    |        |        |        |      |      |
|------|-----|------|-----|---|----|--------|--------|--------|------|------|
| ATOM | 501 | O    | VAL | A | 68 | 34.299 | 26.139 | 21.343 | 1.00 | 0.00 |
| ATOM | 502 | CB   | VAL | A | 68 | 35.318 | 25.397 | 18.240 | 1.00 | 0.00 |
| ATOM | 503 | CG1  | VAL | A | 68 | 36.540 | 25.260 | 19.147 | 1.00 | 0.00 |
| ATOM | 504 | CG2  | VAL | A | 68 | 35.243 | 24.248 | 17.235 | 1.00 | 0.00 |
| ATOM | 505 | H    | VAL | A | 68 | 33.051 | 26.045 | 17.236 | 1.00 | 0.00 |
| ATOM | 506 | HA   | VAL | A | 68 | 33.918 | 24.482 | 19.541 | 1.00 | 0.00 |
| ATOM | 507 | HB   | VAL | A | 68 | 35.418 | 26.322 | 17.671 | 1.00 | 0.00 |
| ATOM | 508 | 1HG1 | VAL | A | 68 | 37.444 | 25.226 | 18.538 | 1.00 | 0.00 |
| ATOM | 509 | 2HG1 | VAL | A | 68 | 36.590 | 26.114 | 19.822 | 1.00 | 0.00 |
| ATOM | 510 | 3HG1 | VAL | A | 68 | 36.461 | 24.341 | 19.728 | 1.00 | 0.00 |
| ATOM | 511 | 1HG2 | VAL | A | 68 | 36.165 | 24.209 | 16.656 | 1.00 | 0.00 |
| ATOM | 512 | 2HG2 | VAL | A | 68 | 35.109 | 23.307 | 17.769 | 1.00 | 0.00 |
| ATOM | 513 | 3HG2 | VAL | A | 68 | 34.400 | 24.407 | 16.562 | 1.00 | 0.00 |
| ATOM | 514 | N    | ARG | A | 69 | 33.889 | 27.744 | 19.824 | 1.00 | 0.00 |
| ATOM | 515 | CA   | ARG | A | 69 | 33.935 | 28.816 | 20.799 | 1.00 | 0.00 |
| ATOM | 516 | C    | ARG | A | 69 | 32.754 | 28.827 | 21.761 | 1.00 | 0.00 |
| ATOM | 517 | O    | ARG | A | 69 | 32.925 | 29.141 | 22.936 | 1.00 | 0.00 |
| ATOM | 518 | CB   | ARG | A | 69 | 34.095 | 30.169 | 20.121 | 1.00 | 0.00 |
| ATOM | 519 | CG   | ARG | A | 69 | 34.352 | 31.332 | 21.066 | 1.00 | 0.00 |
| ATOM | 520 | CD   | ARG | A | 69 | 35.613 | 31.221 | 21.843 | 1.00 | 0.00 |
| ATOM | 521 | NE   | ARG | A | 69 | 36.021 | 32.449 | 22.508 | 1.00 | 0.00 |
| ATOM | 522 | CZ   | ARG | A | 69 | 36.720 | 32.500 | 23.659 | 1.00 | 0.00 |
| ATOM | 523 | NH1  | ARG | A | 69 | 37.058 | 31.401 | 24.295 | 1.00 | 0.00 |
| ATOM | 524 | NH2  | ARG | A | 69 | 37.036 | 33.688 | 24.145 | 1.00 | 0.00 |
| ATOM | 525 | H    | ARG | A | 69 | 33.699 | 27.966 | 18.857 | 1.00 | 0.00 |
| ATOM | 526 | HA   | ARG | A | 69 | 34.811 | 28.697 | 21.437 | 1.00 | 0.00 |
| ATOM | 527 | 1HB  | ARG | A | 69 | 34.928 | 30.080 | 19.425 | 1.00 | 0.00 |
| ATOM | 528 | 2HB  | ARG | A | 69 | 33.176 | 30.356 | 19.565 | 1.00 | 0.00 |
| ATOM | 529 | 1HG  | ARG | A | 69 | 34.397 | 32.251 | 20.482 | 1.00 | 0.00 |
| ATOM | 530 | 2HG  | ARG | A | 69 | 33.525 | 31.392 | 21.774 | 1.00 | 0.00 |
| ATOM | 531 | 1HD  | ARG | A | 69 | 35.490 | 30.459 | 22.612 | 1.00 | 0.00 |
| ATOM | 532 | 2HD  | ARG | A | 69 | 36.419 | 30.931 | 21.170 | 1.00 | 0.00 |
| ATOM | 533 | HE   | ARG | A | 69 | 35.861 | 33.411 | 22.239 | 1.00 | 0.00 |
| ATOM | 534 | 1HH1 | ARG | A | 69 | 36.793 | 30.501 | 23.919 | 1.00 | 0.00 |
| ATOM | 535 | 2HH1 | ARG | A | 69 | 37.582 | 31.460 | 25.156 | 1.00 | 0.00 |
| ATOM | 536 | 1HH2 | ARG | A | 69 | 36.752 | 34.523 | 23.652 | 1.00 | 0.00 |
| ATOM | 537 | 2HH2 | ARG | A | 69 | 37.558 | 33.755 | 25.005 | 1.00 | 0.00 |
| ATOM | 538 | N    | SER | A | 70 | 31.557 | 28.504 | 21.274 | 1.00 | 0.00 |
| ATOM | 539 | CA   | SER | A | 70 | 30.374 | 28.470 | 22.143 | 1.00 | 0.00 |
| ATOM | 540 | C    | SER | A | 70 | 30.579 | 27.394 | 23.207 | 1.00 | 0.00 |
| ATOM | 541 | O    | SER | A | 70 | 30.166 | 27.534 | 24.355 | 1.00 | 0.00 |
| ATOM | 542 | CB   | SER | A | 70 | 29.117 | 28.203 | 21.338 | 1.00 | 0.00 |
| ATOM | 543 | OG   | SER | A | 70 | 29.124 | 26.926 | 20.760 | 1.00 | 0.00 |
| ATOM | 544 | H    | SER | A | 70 | 31.455 | 28.278 | 20.295 | 1.00 | 0.00 |
| ATOM | 545 | HA   | SER | A | 70 | 30.135 | 29.437 | 22.588 | 1.00 | 0.00 |
| ATOM | 546 | 1HB  | SER | A | 70 | 28.255 | 28.288 | 21.999 | 1.00 | 0.00 |
| ATOM | 547 | 2HB  | SER | A | 70 | 29.043 | 28.949 | 20.548 | 1.00 | 0.00 |
| ATOM | 548 | HG   | SER | A | 70 | 28.225 | 26.672 | 20.536 | 1.00 | 0.00 |
| ATOM | 549 | N    | SER | A | 71 | 31.229 | 26.315 | 22.800 | 1.00 | 0.00 |
| ATOM | 550 | CA   | SER | A | 71 | 31.519 | 25.213 | 23.687 | 1.00 | 0.00 |
| ATOM | 551 | C    | SER | A | 71 | 32.511 | 25.645 | 24.769 | 1.00 | 0.00 |
| ATOM | 552 | O    | SER | A | 71 | 32.519 | 25.091 | 25.865 | 1.00 | 0.00 |
| ATOM | 553 | CB   | SER | A | 71 | 32.059 | 24.038 | 22.896 | 1.00 | 0.00 |
| ATOM | 554 | OG   | SER | A | 71 | 31.107 | 23.517 | 22.010 | 1.00 | 0.00 |
| ATOM | 555 | H    | SER | A | 71 | 31.530 | 26.264 | 21.837 | 1.00 | 0.00 |
| ATOM | 556 | HA   | SER | A | 71 | 30.628 | 24.778 | 24.142 | 1.00 | 0.00 |
| ATOM | 557 | 1HB  | SER | A | 71 | 32.928 | 24.370 | 22.328 | 1.00 | 0.00 |
| ATOM | 558 | 2HB  | SER | A | 71 | 32.360 | 23.256 | 23.593 | 1.00 | 0.00 |
| ATOM | 559 | HG   | SER | A | 71 | 31.488 | 22.777 | 21.530 | 1.00 | 0.00 |
| ATOM | 560 | N    | MET | A | 72 | 33.355 | 26.625 | 24.462 | 1.00 | 0.00 |
| ATOM | 561 | CA   | MET | A | 72 | 34.327 | 27.110 | 25.440 | 1.00 | 0.00 |
| ATOM | 562 | C    | MET | A | 72 | 33.718 | 28.175 | 26.352 | 1.00 | 0.00 |
| ATOM | 563 | O    | MET | A | 72 | 34.137 | 28.327 | 27.493 | 1.00 | 0.00 |

PEDF\_P1\_final\_docking\_model.txt

|      |     |      |     |   |    |        |        |        |      |      |
|------|-----|------|-----|---|----|--------|--------|--------|------|------|
| ATOM | 564 | CB   | MET | A | 72 | 35.557 | 27.667 | 24.726 | 1.00 | 0.00 |
| ATOM | 565 | CG   | MET | A | 72 | 36.418 | 26.615 | 24.041 | 1.00 | 0.00 |
| ATOM | 566 | SD   | MET | A | 72 | 37.833 | 27.329 | 23.180 | 1.00 | 0.00 |
| ATOM | 567 | CE   | MET | A | 72 | 38.539 | 25.869 | 22.421 | 1.00 | 0.00 |
| ATOM | 568 | H    | MET | A | 72 | 33.330 | 27.044 | 23.544 | 1.00 | 0.00 |
| ATOM | 569 | HA   | MET | A | 72 | 34.640 | 26.293 | 26.089 | 1.00 | 0.00 |
| ATOM | 570 | 1HB  | MET | A | 72 | 35.198 | 28.382 | 23.987 | 1.00 | 0.00 |
| ATOM | 571 | 2HB  | MET | A | 72 | 36.151 | 28.189 | 25.478 | 1.00 | 0.00 |
| ATOM | 572 | 1HG  | MET | A | 72 | 36.774 | 25.920 | 24.800 | 1.00 | 0.00 |
| ATOM | 573 | 2HG  | MET | A | 72 | 35.794 | 26.083 | 23.323 | 1.00 | 0.00 |
| ATOM | 574 | 1HE  | MET | A | 72 | 39.426 | 26.146 | 21.851 | 1.00 | 0.00 |
| ATOM | 575 | 2HE  | MET | A | 72 | 38.814 | 25.152 | 23.196 | 1.00 | 0.00 |
| ATOM | 576 | 3HE  | MET | A | 72 | 37.805 | 25.416 | 21.753 | 1.00 | 0.00 |
| ATOM | 577 | N    | SER | A | 73 | 32.730 | 28.909 | 25.851 | 1.00 | 0.00 |
| ATOM | 578 | CA   | SER | A | 73 | 32.077 | 29.945 | 26.644 | 1.00 | 0.00 |
| ATOM | 579 | C    | SER | A | 73 | 30.625 | 29.526 | 26.895 | 1.00 | 0.00 |
| ATOM | 580 | O    | SER | A | 73 | 29.693 | 30.047 | 26.279 | 1.00 | 0.00 |
| ATOM | 581 | CB   | SER | A | 73 | 32.145 | 31.285 | 25.938 | 1.00 | 0.00 |
| ATOM | 582 | OG   | SER | A | 73 | 33.466 | 31.691 | 25.705 | 1.00 | 0.00 |
| ATOM | 583 | H    | SER | A | 73 | 32.423 | 28.749 | 24.902 | 1.00 | 0.00 |
| ATOM | 584 | HA   | SER | A | 73 | 32.598 | 30.171 | 27.575 | 1.00 | 0.00 |
| ATOM | 585 | 1HB  | SER | A | 73 | 31.625 | 31.203 | 24.984 | 1.00 | 0.00 |
| ATOM | 586 | 2HB  | SER | A | 73 | 31.650 | 32.032 | 26.558 | 1.00 | 0.00 |
| ATOM | 587 | HG   | SER | A | 73 | 33.465 | 32.541 | 25.258 | 1.00 | 0.00 |
| ATOM | 588 | N    | PRO | A | 74 | 30.421 | 28.567 | 27.812 | 1.00 | 0.00 |
| ATOM | 589 | CA   | PRO | A | 74 | 29.099 | 28.041 | 28.171 | 1.00 | 0.00 |
| ATOM | 590 | C    | PRO | A | 74 | 28.181 | 28.989 | 28.923 | 1.00 | 0.00 |
| ATOM | 591 | O    | PRO | A | 74 | 26.968 | 28.803 | 28.924 | 1.00 | 0.00 |
| ATOM | 592 | CB   | PRO | A | 74 | 29.437 | 26.816 | 29.026 | 1.00 | 0.00 |
| ATOM | 593 | CG   | PRO | A | 74 | 30.794 | 27.105 | 29.570 | 1.00 | 0.00 |
| ATOM | 594 | CD   | PRO | A | 74 | 31.505 | 27.868 | 28.484 | 1.00 | 0.00 |
| ATOM | 595 | HA   | PRO | A | 74 | 28.489 | 27.786 | 27.292 | 1.00 | 0.00 |
| ATOM | 596 | 1HB  | PRO | A | 74 | 28.705 | 26.675 | 29.835 | 1.00 | 0.00 |
| ATOM | 597 | 2HB  | PRO | A | 74 | 29.437 | 25.893 | 28.427 | 1.00 | 0.00 |
| ATOM | 598 | 1HG  | PRO | A | 74 | 30.734 | 27.698 | 30.495 | 1.00 | 0.00 |
| ATOM | 599 | 2HG  | PRO | A | 74 | 31.330 | 26.177 | 29.817 | 1.00 | 0.00 |
| ATOM | 600 | 1HD  | PRO | A | 74 | 32.240 | 28.579 | 28.888 | 1.00 | 0.00 |
| ATOM | 601 | 2HD  | PRO | A | 74 | 32.046 | 27.204 | 27.795 | 1.00 | 0.00 |
| ATOM | 602 | N    | THR | A | 75 | 28.752 | 30.010 | 29.549 | 1.00 | 0.00 |
| ATOM | 603 | CA   | THR | A | 75 | 27.953 | 30.951 | 30.325 | 1.00 | 0.00 |
| ATOM | 604 | C    | THR | A | 75 | 28.117 | 32.427 | 29.955 | 1.00 | 0.00 |
| ATOM | 605 | O    | THR | A | 75 | 27.674 | 33.302 | 30.697 | 1.00 | 0.00 |
| ATOM | 606 | CB   | THR | A | 75 | 28.265 | 30.799 | 31.825 | 1.00 | 0.00 |
| ATOM | 607 | OG1  | THR | A | 75 | 29.664 | 31.018 | 32.050 | 1.00 | 0.00 |
| ATOM | 608 | CG2  | THR | A | 75 | 27.890 | 29.407 | 32.310 | 1.00 | 0.00 |
| ATOM | 609 | H    | THR | A | 75 | 29.752 | 30.143 | 29.492 | 1.00 | 0.00 |
| ATOM | 610 | HA   | THR | A | 75 | 26.893 | 30.763 | 30.155 | 1.00 | 0.00 |
| ATOM | 611 | HB   | THR | A | 75 | 27.696 | 31.543 | 32.383 | 1.00 | 0.00 |
| ATOM | 612 | HG1  | THR | A | 75 | 29.856 | 30.922 | 32.986 | 1.00 | 0.00 |
| ATOM | 613 | 1HG2 | THR | A | 75 | 28.117 | 29.319 | 33.372 | 1.00 | 0.00 |
| ATOM | 614 | 2HG2 | THR | A | 75 | 26.824 | 29.242 | 32.151 | 1.00 | 0.00 |
| ATOM | 615 | 3HG2 | THR | A | 75 | 28.459 | 28.663 | 31.754 | 1.00 | 0.00 |
| ATOM | 616 | N    | THR | A | 76 | 28.740 | 32.706 | 28.815 | 1.00 | 0.00 |
| ATOM | 617 | CA   | THR | A | 76 | 28.956 | 34.083 | 28.393 | 1.00 | 0.00 |
| ATOM | 618 | C    | THR | A | 76 | 28.517 | 34.274 | 26.953 | 1.00 | 0.00 |
| ATOM | 619 | O    | THR | A | 76 | 28.486 | 33.319 | 26.186 | 1.00 | 0.00 |
| ATOM | 620 | CB   | THR | A | 76 | 30.433 | 34.498 | 28.531 | 1.00 | 0.00 |
| ATOM | 621 | OG1  | THR | A | 76 | 31.243 | 33.678 | 27.679 | 1.00 | 0.00 |
| ATOM | 622 | CG2  | THR | A | 76 | 30.898 | 34.343 | 29.970 | 1.00 | 0.00 |
| ATOM | 623 | H    | THR | A | 76 | 29.071 | 31.954 | 28.228 | 1.00 | 0.00 |
| ATOM | 624 | HA   | THR | A | 76 | 28.349 | 34.755 | 29.001 | 1.00 | 0.00 |
| ATOM | 625 | HB   | THR | A | 76 | 30.538 | 35.539 | 28.226 | 1.00 | 0.00 |
| ATOM | 626 | HG1  | THR | A | 76 | 32.164 | 33.938 | 27.767 | 1.00 | 0.00 |

PEDF\_P1\_final\_docking\_model.txt

|      |     |      |     |   |    |        |        |        |      |      |
|------|-----|------|-----|---|----|--------|--------|--------|------|------|
| ATOM | 627 | 1HG2 | THR | A | 76 | 31.944 | 34.641 | 30.048 | 1.00 | 0.00 |
| ATOM | 628 | 2HG2 | THR | A | 76 | 30.291 | 34.974 | 30.619 | 1.00 | 0.00 |
| ATOM | 629 | 3HG2 | THR | A | 76 | 30.794 | 33.302 | 30.275 | 1.00 | 0.00 |
| ATOM | 630 | N    | ASN | A | 77 | 28.175 | 35.506 | 26.584 | 1.00 | 0.00 |
| ATOM | 631 | CA   | ASN | A | 77 | 27.760 | 35.785 | 25.214 | 1.00 | 0.00 |
| ATOM | 632 | C    | ASN | A | 77 | 28.915 | 35.476 | 24.282 | 1.00 | 0.00 |
| ATOM | 633 | O    | ASN | A | 77 | 30.072 | 35.553 | 24.680 | 1.00 | 0.00 |
| ATOM | 634 | CB   | ASN | A | 77 | 27.429 | 37.269 | 24.975 | 1.00 | 0.00 |
| ATOM | 635 | CG   | ASN | A | 77 | 26.175 | 37.733 | 25.687 | 1.00 | 0.00 |
| ATOM | 636 | OD1  | ASN | A | 77 | 25.506 | 36.982 | 26.386 | 1.00 | 0.00 |
| ATOM | 637 | ND2  | ASN | A | 77 | 25.907 | 39.039 | 25.506 | 1.00 | 0.00 |
| ATOM | 638 | H    | ASN | A | 77 | 28.200 | 36.261 | 27.254 | 1.00 | 0.00 |
| ATOM | 639 | HA   | ASN | A | 77 | 26.924 | 35.139 | 24.942 | 1.00 | 0.00 |
| ATOM | 640 | 1HB  | ASN | A | 77 | 28.200 | 38.035 | 25.069 | 1.00 | 0.00 |
| ATOM | 641 | 2HB  | ASN | A | 77 | 27.198 | 37.113 | 23.921 | 1.00 | 0.00 |
| ATOM | 642 | 1HD2 | ASN | A | 77 | 25.100 | 39.447 | 25.934 | 1.00 | 0.00 |
| ATOM | 643 | 2HD2 | ASN | A | 77 | 26.514 | 39.601 | 24.944 | 1.00 | 0.00 |
| ATOM | 644 | N    | VAL | A | 78 | 28.609 | 35.125 | 23.041 | 1.00 | 0.00 |
| ATOM | 645 | CA   | VAL | A | 78 | 29.667 | 34.873 | 22.075 | 1.00 | 0.00 |
| ATOM | 646 | C    | VAL | A | 78 | 29.420 | 35.768 | 20.878 | 1.00 | 0.00 |
| ATOM | 647 | O    | VAL | A | 78 | 28.430 | 35.598 | 20.182 | 1.00 | 0.00 |
| ATOM | 648 | CB   | VAL | A | 78 | 29.720 | 33.400 | 21.627 | 1.00 | 0.00 |
| ATOM | 649 | CG1  | VAL | A | 78 | 30.824 | 33.195 | 20.601 | 1.00 | 0.00 |
| ATOM | 650 | CG2  | VAL | A | 78 | 29.931 | 32.486 | 22.824 | 1.00 | 0.00 |
| ATOM | 651 | H    | VAL | A | 78 | 27.646 | 35.029 | 22.752 | 1.00 | 0.00 |
| ATOM | 652 | HA   | VAL | A | 78 | 30.645 | 35.138 | 22.479 | 1.00 | 0.00 |
| ATOM | 653 | HB   | VAL | A | 78 | 28.760 | 33.129 | 21.187 | 1.00 | 0.00 |
| ATOM | 654 | 1HG1 | VAL | A | 78 | 30.848 | 32.149 | 20.295 | 1.00 | 0.00 |
| ATOM | 655 | 2HG1 | VAL | A | 78 | 30.634 | 33.823 | 19.730 | 1.00 | 0.00 |
| ATOM | 656 | 3HG1 | VAL | A | 78 | 31.784 | 33.465 | 21.040 | 1.00 | 0.00 |
| ATOM | 657 | 1HG2 | VAL | A | 78 | 29.966 | 31.450 | 22.490 | 1.00 | 0.00 |
| ATOM | 658 | 2HG2 | VAL | A | 78 | 30.871 | 32.741 | 23.314 | 1.00 | 0.00 |
| ATOM | 659 | 3HG2 | VAL | A | 78 | 29.108 | 32.612 | 23.528 | 1.00 | 0.00 |
| ATOM | 660 | N    | LEU | A | 79 | 30.293 | 36.743 | 20.652 | 1.00 | 0.00 |
| ATOM | 661 | CA   | LEU | A | 79 | 30.130 | 37.611 | 19.497 | 1.00 | 0.00 |
| ATOM | 662 | C    | LEU | A | 79 | 31.255 | 37.226 | 18.554 | 1.00 | 0.00 |
| ATOM | 663 | O    | LEU | A | 79 | 32.421 | 37.174 | 18.955 | 1.00 | 0.00 |
| ATOM | 664 | CB   | LEU | A | 79 | 30.267 | 39.066 | 19.930 | 1.00 | 0.00 |
| ATOM | 665 | CG   | LEU | A | 79 | 29.956 | 40.026 | 18.790 | 1.00 | 0.00 |
| ATOM | 666 | CD1  | LEU | A | 79 | 28.497 | 39.887 | 18.350 | 1.00 | 0.00 |
| ATOM | 667 | CD2  | LEU | A | 79 | 30.353 | 41.462 | 19.132 | 1.00 | 0.00 |
| ATOM | 668 | H    | LEU | A | 79 | 31.075 | 36.893 | 21.274 | 1.00 | 0.00 |
| ATOM | 669 | HA   | LEU | A | 79 | 29.164 | 37.421 | 19.031 | 1.00 | 0.00 |
| ATOM | 670 | 1HB  | LEU | A | 79 | 29.493 | 39.097 | 20.695 | 1.00 | 0.00 |
| ATOM | 671 | 2HB  | LEU | A | 79 | 31.237 | 39.262 | 20.387 | 1.00 | 0.00 |
| ATOM | 672 | HG   | LEU | A | 79 | 30.566 | 39.725 | 17.938 | 1.00 | 0.00 |
| ATOM | 673 | 1HD1 | LEU | A | 79 | 28.295 | 40.581 | 17.534 | 1.00 | 0.00 |
| ATOM | 674 | 2HD1 | LEU | A | 79 | 28.315 | 38.867 | 18.011 | 1.00 | 0.00 |
| ATOM | 675 | 3HD1 | LEU | A | 79 | 27.841 | 40.113 | 19.190 | 1.00 | 0.00 |
| ATOM | 676 | 1HD2 | LEU | A | 79 | 30.115 | 42.115 | 18.291 | 1.00 | 0.00 |
| ATOM | 677 | 2HD2 | LEU | A | 79 | 29.805 | 41.791 | 20.015 | 1.00 | 0.00 |
| ATOM | 678 | 3HD2 | LEU | A | 79 | 31.424 | 41.506 | 19.333 | 1.00 | 0.00 |
| ATOM | 679 | N    | LEU | A | 80 | 30.904 | 36.950 | 17.303 | 1.00 | 0.00 |
| ATOM | 680 | CA   | LEU | A | 80 | 31.897 | 36.512 | 16.344 | 1.00 | 0.00 |
| ATOM | 681 | C    | LEU | A | 80 | 31.616 | 36.965 | 14.920 | 1.00 | 0.00 |
| ATOM | 682 | O    | LEU | A | 80 | 30.477 | 36.940 | 14.467 | 1.00 | 0.00 |
| ATOM | 683 | CB   | LEU | A | 80 | 32.009 | 34.983 | 16.391 | 1.00 | 0.00 |
| ATOM | 684 | CG   | LEU | A | 80 | 32.750 | 34.420 | 17.611 | 1.00 | 0.00 |
| ATOM | 685 | CD1  | LEU | A | 80 | 32.596 | 32.906 | 17.662 | 1.00 | 0.00 |
| ATOM | 686 | CD2  | LEU | A | 80 | 34.218 | 34.810 | 17.539 | 1.00 | 0.00 |
| ATOM | 687 | H    | LEU | A | 80 | 29.942 | 37.043 | 17.008 | 1.00 | 0.00 |
| ATOM | 688 | HA   | LEU | A | 80 | 32.862 | 36.952 | 16.591 | 1.00 | 0.00 |
| ATOM | 689 | 1HB  | LEU | A | 80 | 30.952 | 34.730 | 16.446 | 1.00 | 0.00 |

PEDF\_P1\_final\_docking\_model.txt

|      |     |      |     |   |    |        |        |        |      |      |
|------|-----|------|-----|---|----|--------|--------|--------|------|------|
| ATOM | 690 | 2HB  | LEU | A | 80 | 32.431 | 34.581 | 15.470 | 1.00 | 0.00 |
| ATOM | 691 | HG   | LEU | A | 80 | 32.322 | 34.892 | 18.496 | 1.00 | 0.00 |
| ATOM | 692 | 1HD1 | LEU | A | 80 | 33.125 | 32.515 | 18.531 | 1.00 | 0.00 |
| ATOM | 693 | 2HD1 | LEU | A | 80 | 31.539 | 32.650 | 17.736 | 1.00 | 0.00 |
| ATOM | 694 | 3HD1 | LEU | A | 80 | 33.013 | 32.467 | 16.756 | 1.00 | 0.00 |
| ATOM | 695 | 1HD2 | LEU | A | 80 | 34.744 | 34.410 | 18.407 | 1.00 | 0.00 |
| ATOM | 696 | 2HD2 | LEU | A | 80 | 34.659 | 34.404 | 16.628 | 1.00 | 0.00 |
| ATOM | 697 | 3HD2 | LEU | A | 80 | 34.307 | 35.897 | 17.531 | 1.00 | 0.00 |
| ATOM | 698 | N    | SER | A | 81 | 32.666 | 37.380 | 14.220 | 1.00 | 0.00 |
| ATOM | 699 | CA   | SER | A | 81 | 32.550 | 37.805 | 12.828 | 1.00 | 0.00 |
| ATOM | 700 | C    | SER | A | 81 | 33.652 | 37.063 | 12.068 | 1.00 | 0.00 |
| ATOM | 701 | O    | SER | A | 81 | 34.631 | 37.657 | 11.614 | 1.00 | 0.00 |
| ATOM | 702 | CB   | SER | A | 81 | 32.688 | 39.309 | 12.691 | 1.00 | 0.00 |
| ATOM | 703 | OG   | SER | A | 81 | 32.411 | 39.747 | 11.389 | 1.00 | 0.00 |
| ATOM | 704 | H    | SER | A | 81 | 33.571 | 37.401 | 14.667 | 1.00 | 0.00 |
| ATOM | 705 | HA   | SER | A | 81 | 31.554 | 37.654 | 12.411 | 1.00 | 0.00 |
| ATOM | 706 | 1HB  | SER | A | 81 | 31.992 | 39.786 | 13.381 | 1.00 | 0.00 |
| ATOM | 707 | 2HB  | SER | A | 81 | 33.707 | 39.591 | 12.951 | 1.00 | 0.00 |
| ATOM | 708 | HG   | SER | A | 81 | 31.663 | 39.256 | 11.039 | 1.00 | 0.00 |
| ATOM | 709 | N    | PRO | A | 82 | 33.494 | 35.736 | 11.934 | 1.00 | 0.00 |
| ATOM | 710 | CA   | PRO | A | 82 | 34.369 | 34.765 | 11.274 | 1.00 | 0.00 |
| ATOM | 711 | C    | PRO | A | 82 | 35.039 | 35.202 | 9.975  | 1.00 | 0.00 |
| ATOM | 712 | O    | PRO | A | 82 | 36.200 | 34.864 | 9.738  | 1.00 | 0.00 |
| ATOM | 713 | CB   | PRO | A | 82 | 33.428 | 33.581 | 11.030 | 1.00 | 0.00 |
| ATOM | 714 | CG   | PRO | A | 82 | 32.463 | 33.633 | 12.165 | 1.00 | 0.00 |
| ATOM | 715 | CD   | PRO | A | 82 | 32.314 | 35.094 | 12.495 | 1.00 | 0.00 |
| ATOM | 716 | HA   | PRO | A | 82 | 35.242 | 34.495 | 11.886 | 1.00 | 0.00 |
| ATOM | 717 | 1HB  | PRO | A | 82 | 32.911 | 33.670 | 10.063 | 1.00 | 0.00 |
| ATOM | 718 | 2HB  | PRO | A | 82 | 33.976 | 32.627 | 11.016 | 1.00 | 0.00 |
| ATOM | 719 | 1HG  | PRO | A | 82 | 31.496 | 33.189 | 11.886 | 1.00 | 0.00 |
| ATOM | 720 | 2HG  | PRO | A | 82 | 32.838 | 33.068 | 13.031 | 1.00 | 0.00 |
| ATOM | 721 | 1HD  | PRO | A | 82 | 31.411 | 35.532 | 12.044 | 1.00 | 0.00 |
| ATOM | 722 | 2HD  | PRO | A | 82 | 32.250 | 35.271 | 13.579 | 1.00 | 0.00 |
| ATOM | 723 | N    | LEU | A | 83 | 34.312 | 35.938 | 9.134  | 1.00 | 0.00 |
| ATOM | 724 | CA   | LEU | A | 83 | 34.853 | 36.393 | 7.856  | 1.00 | 0.00 |
| ATOM | 725 | C    | LEU | A | 83 | 36.252 | 37.018 | 7.941  | 1.00 | 0.00 |
| ATOM | 726 | O    | LEU | A | 83 | 37.136 | 36.679 | 7.158  | 1.00 | 0.00 |
| ATOM | 727 | CB   | LEU | A | 83 | 33.870 | 37.379 | 7.223  | 1.00 | 0.00 |
| ATOM | 728 | CG   | LEU | A | 83 | 34.317 | 37.925 | 5.864  | 1.00 | 0.00 |
| ATOM | 729 | CD1  | LEU | A | 83 | 34.426 | 36.830 | 4.800  | 1.00 | 0.00 |
| ATOM | 730 | CD2  | LEU | A | 83 | 33.427 | 39.080 | 5.410  | 1.00 | 0.00 |
| ATOM | 731 | H    | LEU | A | 83 | 33.366 | 36.187 | 9.385  | 1.00 | 0.00 |
| ATOM | 732 | HA   | LEU | A | 83 | 34.979 | 35.541 | 7.189  | 1.00 | 0.00 |
| ATOM | 733 | 1HB  | LEU | A | 83 | 33.011 | 36.721 | 7.104  | 1.00 | 0.00 |
| ATOM | 734 | 2HB  | LEU | A | 83 | 33.615 | 38.189 | 7.906  | 1.00 | 0.00 |
| ATOM | 735 | HG   | LEU | A | 83 | 35.322 | 38.328 | 5.992  | 1.00 | 0.00 |
| ATOM | 736 | 1HD1 | LEU | A | 83 | 34.746 | 37.270 | 3.856  | 1.00 | 0.00 |
| ATOM | 737 | 2HD1 | LEU | A | 83 | 35.156 | 36.085 | 5.118  | 1.00 | 0.00 |
| ATOM | 738 | 3HD1 | LEU | A | 83 | 33.455 | 36.354 | 4.667  | 1.00 | 0.00 |
| ATOM | 739 | 1HD2 | LEU | A | 83 | 33.772 | 39.445 | 4.442  | 1.00 | 0.00 |
| ATOM | 740 | 2HD2 | LEU | A | 83 | 32.397 | 38.734 | 5.322  | 1.00 | 0.00 |
| ATOM | 741 | 3HD2 | LEU | A | 83 | 33.477 | 39.887 | 6.141  | 1.00 | 0.00 |
| ATOM | 742 | N    | SER | A | 84 | 36.453 | 37.927 | 8.888  | 1.00 | 0.00 |
| ATOM | 743 | CA   | SER | A | 84 | 37.750 | 38.575 | 9.050  | 1.00 | 0.00 |
| ATOM | 744 | C    | SER | A | 84 | 38.857 | 37.567 | 9.374  | 1.00 | 0.00 |
| ATOM | 745 | O    | SER | A | 84 | 40.011 | 37.744 | 8.986  | 1.00 | 0.00 |
| ATOM | 746 | CB   | SER | A | 84 | 37.665 | 39.630 | 10.135 | 1.00 | 0.00 |
| ATOM | 747 | OG   | SER | A | 84 | 37.418 | 39.071 | 11.396 | 1.00 | 0.00 |
| ATOM | 748 | H    | SER | A | 84 | 35.697 | 38.177 | 9.509  | 1.00 | 0.00 |
| ATOM | 749 | HA   | SER | A | 84 | 38.047 | 39.172 | 8.186  | 1.00 | 0.00 |
| ATOM | 750 | 1HB  | SER | A | 84 | 38.609 | 40.173 | 10.168 | 1.00 | 0.00 |
| ATOM | 751 | 2HB  | SER | A | 84 | 36.859 | 40.320 | 9.889  | 1.00 | 0.00 |
| ATOM | 752 | HG   | SER | A | 84 | 36.584 | 38.594 | 11.376 | 1.00 | 0.00 |

PEDF\_P1\_final\_docking\_model.txt

|      |     |      |     |   |    |        |        |        |      |      |
|------|-----|------|-----|---|----|--------|--------|--------|------|------|
| ATOM | 753 | N    | VAL | A | 85 | 38.499 | 36.508 | 10.089 | 1.00 | 0.00 |
| ATOM | 754 | CA   | VAL | A | 85 | 39.461 | 35.479 | 10.462 | 1.00 | 0.00 |
| ATOM | 755 | C    | VAL | A | 85 | 39.689 | 34.488 | 9.328  | 1.00 | 0.00 |
| ATOM | 756 | O    | VAL | A | 85 | 40.810 | 34.032 | 9.114  | 1.00 | 0.00 |
| ATOM | 757 | CB   | VAL | A | 85 | 39.004 | 34.710 | 11.716 | 1.00 | 0.00 |
| ATOM | 758 | CG1  | VAL | A | 85 | 39.954 | 33.559 | 12.011 | 1.00 | 0.00 |
| ATOM | 759 | CG2  | VAL | A | 85 | 38.915 | 35.645 | 12.912 | 1.00 | 0.00 |
| ATOM | 760 | H    | VAL | A | 85 | 37.537 | 36.412 | 10.382 | 1.00 | 0.00 |
| ATOM | 761 | HA   | VAL | A | 85 | 40.445 | 35.907 | 10.655 | 1.00 | 0.00 |
| ATOM | 762 | HB   | VAL | A | 85 | 38.001 | 34.318 | 11.545 | 1.00 | 0.00 |
| ATOM | 763 | 1HG1 | VAL | A | 85 | 39.616 | 33.026 | 12.900 | 1.00 | 0.00 |
| ATOM | 764 | 2HG1 | VAL | A | 85 | 39.971 | 32.875 | 11.163 | 1.00 | 0.00 |
| ATOM | 765 | 3HG1 | VAL | A | 85 | 40.957 | 33.950 | 12.183 | 1.00 | 0.00 |
| ATOM | 766 | 1HG2 | VAL | A | 85 | 38.590 | 35.086 | 13.789 | 1.00 | 0.00 |
| ATOM | 767 | 2HG2 | VAL | A | 85 | 39.895 | 36.084 | 13.103 | 1.00 | 0.00 |
| ATOM | 768 | 3HG2 | VAL | A | 85 | 38.197 | 36.438 | 12.702 | 1.00 | 0.00 |
| ATOM | 769 | N    | ALA | A | 86 | 38.623 | 34.152 | 8.607  | 1.00 | 0.00 |
| ATOM | 770 | CA   | ALA | A | 86 | 38.732 | 33.215 | 7.496  | 1.00 | 0.00 |
| ATOM | 771 | C    | ALA | A | 86 | 39.618 | 33.834 | 6.424  | 1.00 | 0.00 |
| ATOM | 772 | O    | ALA | A | 86 | 40.443 | 33.152 | 5.804  | 1.00 | 0.00 |
| ATOM | 773 | CB   | ALA | A | 86 | 37.359 | 32.921 | 6.903  | 1.00 | 0.00 |
| ATOM | 774 | H    | ALA | A | 86 | 37.721 | 34.550 | 8.829  | 1.00 | 0.00 |
| ATOM | 775 | HA   | ALA | A | 86 | 39.200 | 32.299 | 7.856  | 1.00 | 0.00 |
| ATOM | 776 | 1HB  | ALA | A | 86 | 37.464 | 32.219 | 6.075  | 1.00 | 0.00 |
| ATOM | 777 | 2HB  | ALA | A | 86 | 36.717 | 32.485 | 7.669  | 1.00 | 0.00 |
| ATOM | 778 | 3HB  | ALA | A | 86 | 36.914 | 33.846 | 6.540  | 1.00 | 0.00 |
| ATOM | 779 | N    | THR | A | 87 | 39.445 | 35.139 | 6.224  | 1.00 | 0.00 |
| ATOM | 780 | CA   | THR | A | 87 | 40.210 | 35.876 | 5.235  | 1.00 | 0.00 |
| ATOM | 781 | C    | THR | A | 87 | 41.701 | 35.902 | 5.558  | 1.00 | 0.00 |
| ATOM | 782 | O    | THR | A | 87 | 42.533 | 35.831 | 4.656  | 1.00 | 0.00 |
| ATOM | 783 | CB   | THR | A | 87 | 39.579 | 37.253 | 5.078  | 1.00 | 0.00 |
| ATOM | 784 | OG1  | THR | A | 87 | 38.188 | 37.078 | 4.797  | 1.00 | 0.00 |
| ATOM | 785 | CG2  | THR | A | 87 | 40.253 | 38.096 | 3.993  | 1.00 | 0.00 |
| ATOM | 786 | H    | THR | A | 87 | 38.759 | 35.629 | 6.780  | 1.00 | 0.00 |
| ATOM | 787 | HA   | THR | A | 87 | 40.128 | 35.386 | 4.265  | 1.00 | 0.00 |
| ATOM | 788 | HB   | THR | A | 87 | 39.657 | 37.789 | 6.024  | 1.00 | 0.00 |
| ATOM | 789 | HG1  | THR | A | 87 | 37.982 | 36.140 | 4.774  | 1.00 | 0.00 |
| ATOM | 790 | 1HG2 | THR | A | 87 | 39.760 | 39.066 | 3.928  | 1.00 | 0.00 |
| ATOM | 791 | 2HG2 | THR | A | 87 | 41.304 | 38.238 | 4.244  | 1.00 | 0.00 |
| ATOM | 792 | 3HG2 | THR | A | 87 | 40.174 | 37.584 | 3.035  | 1.00 | 0.00 |
| ATOM | 793 | N    | ALA | A | 88 | 42.046 | 36.010 | 6.834  | 1.00 | 0.00 |
| ATOM | 794 | CA   | ALA | A | 88 | 43.455 | 36.028 | 7.205  | 1.00 | 0.00 |
| ATOM | 795 | C    | ALA | A | 88 | 44.100 | 34.663 | 6.925  | 1.00 | 0.00 |
| ATOM | 796 | O    | ALA | A | 88 | 45.259 | 34.588 | 6.502  | 1.00 | 0.00 |
| ATOM | 797 | CB   | ALA | A | 88 | 43.610 | 36.374 | 8.687  | 1.00 | 0.00 |
| ATOM | 798 | H    | ALA | A | 88 | 41.346 | 36.080 | 7.558  | 1.00 | 0.00 |
| ATOM | 799 | HA   | ALA | A | 88 | 43.968 | 36.770 | 6.593  | 1.00 | 0.00 |
| ATOM | 800 | 1HB  | ALA | A | 88 | 44.668 | 36.384 | 8.949  | 1.00 | 0.00 |
| ATOM | 801 | 2HB  | ALA | A | 88 | 43.180 | 37.357 | 8.878  | 1.00 | 0.00 |
| ATOM | 802 | 3HB  | ALA | A | 88 | 43.095 | 35.628 | 9.290  | 1.00 | 0.00 |
| ATOM | 803 | N    | LEU | A | 89 | 43.350 | 33.586 | 7.146  | 1.00 | 0.00 |
| ATOM | 804 | CA   | LEU | A | 89 | 43.881 | 32.248 | 6.900  | 1.00 | 0.00 |
| ATOM | 805 | C    | LEU | A | 89 | 44.070 | 32.009 | 5.412  | 1.00 | 0.00 |
| ATOM | 806 | O    | LEU | A | 89 | 45.096 | 31.482 | 4.979  | 1.00 | 0.00 |
| ATOM | 807 | CB   | LEU | A | 89 | 42.951 | 31.184 | 7.498  | 1.00 | 0.00 |
| ATOM | 808 | CG   | LEU | A | 89 | 42.909 | 31.141 | 9.031  | 1.00 | 0.00 |
| ATOM | 809 | CD1  | LEU | A | 89 | 41.699 | 30.344 | 9.497  | 1.00 | 0.00 |
| ATOM | 810 | CD2  | LEU | A | 89 | 44.197 | 30.524 | 9.558  | 1.00 | 0.00 |
| ATOM | 811 | H    | LEU | A | 89 | 42.404 | 33.685 | 7.487  | 1.00 | 0.00 |
| ATOM | 812 | HA   | LEU | A | 89 | 44.864 | 32.155 | 7.361  | 1.00 | 0.00 |
| ATOM | 813 | 1HB  | LEU | A | 89 | 42.000 | 31.542 | 7.108  | 1.00 | 0.00 |
| ATOM | 814 | 2HB  | LEU | A | 89 | 43.160 | 30.193 | 7.095  | 1.00 | 0.00 |
| ATOM | 815 | HG   | LEU | A | 89 | 42.865 | 32.172 | 9.383  | 1.00 | 0.00 |

PEDF\_P1\_final\_docking\_model.txt

|      |     |      |     |   |    |        |        |        |      |      |
|------|-----|------|-----|---|----|--------|--------|--------|------|------|
| ATOM | 816 | 1HD1 | LEU | A | 89 | 41.677 | 30.319 | 10.587 | 1.00 | 0.00 |
| ATOM | 817 | 2HD1 | LEU | A | 89 | 40.788 | 30.817 | 9.128  | 1.00 | 0.00 |
| ATOM | 818 | 3HD1 | LEU | A | 89 | 41.762 | 29.327 | 9.113  | 1.00 | 0.00 |
| ATOM | 819 | 1HD2 | LEU | A | 89 | 44.166 | 30.495 | 10.647 | 1.00 | 0.00 |
| ATOM | 820 | 2HD2 | LEU | A | 89 | 44.301 | 29.511 | 9.169  | 1.00 | 0.00 |
| ATOM | 821 | 3HD2 | LEU | A | 89 | 45.047 | 31.126 | 9.235  | 1.00 | 0.00 |
| ATOM | 822 | N    | SER | A | 90 | 43.075 | 32.402 | 4.627  | 1.00 | 0.00 |
| ATOM | 823 | CA   | SER | A | 90 | 43.137 | 32.211 | 3.183  | 1.00 | 0.00 |
| ATOM | 824 | C    | SER | A | 90 | 44.247 | 33.046 | 2.546  | 1.00 | 0.00 |
| ATOM | 825 | O    | SER | A | 90 | 44.881 | 32.627 | 1.584  | 1.00 | 0.00 |
| ATOM | 826 | CB   | SER | A | 90 | 41.723 | 32.569 | 2.691  | 1.00 | 0.00 |
| ATOM | 827 | OG   | SER | A | 90 | 41.444 | 32.117 | 1.359  | 1.00 | 0.00 |
| ATOM | 828 | H    | SER | A | 90 | 42.260 | 32.841 | 5.031  | 1.00 | 0.00 |
| ATOM | 829 | HA   | SER | A | 90 | 43.255 | 31.167 | 2.889  | 1.00 | 0.00 |
| ATOM | 830 | 1HB  | SER | A | 90 | 40.995 | 32.115 | 3.363  | 1.00 | 0.00 |
| ATOM | 831 | 2HB  | SER | A | 90 | 41.609 | 33.652 | 2.713  | 1.00 | 0.00 |
| ATOM | 832 | HG   | SER | A | 90 | 42.213 | 31.661 | 1.009  | 1.00 | 0.00 |
| ATOM | 833 | N    | ALA | A | 91 | 44.476 | 34.235 | 3.087  | 1.00 | 0.00 |
| ATOM | 834 | CA   | ALA | A | 91 | 45.519 | 35.112 | 2.577  | 1.00 | 0.00 |
| ATOM | 835 | C    | ALA | A | 91 | 46.862 | 34.427 | 2.834  | 1.00 | 0.00 |
| ATOM | 836 | O    | ALA | A | 91 | 47.673 | 34.253 | 1.922  | 1.00 | 0.00 |
| ATOM | 837 | CB   | ALA | A | 91 | 45.465 | 36.428 | 3.347  | 1.00 | 0.00 |
| ATOM | 838 | H    | ALA | A | 91 | 43.916 | 34.540 | 3.870  | 1.00 | 0.00 |
| ATOM | 839 | HA   | ALA | A | 91 | 45.374 | 35.240 | 1.504  | 1.00 | 0.00 |
| ATOM | 840 | 1HB  | ALA | A | 91 | 46.241 | 37.097 | 2.976  | 1.00 | 0.00 |
| ATOM | 841 | 2HB  | ALA | A | 91 | 44.489 | 36.892 | 3.207  | 1.00 | 0.00 |
| ATOM | 842 | 3HB  | ALA | A | 91 | 45.628 | 36.236 | 4.406  | 1.00 | 0.00 |
| ATOM | 843 | N    | LEU | A | 92 | 47.080 | 34.022 | 4.081  | 1.00 | 0.00 |
| ATOM | 844 | CA   | LEU | A | 92 | 48.313 | 33.351 | 4.470  | 1.00 | 0.00 |
| ATOM | 845 | C    | LEU | A | 92 | 48.600 | 32.125 | 3.596  | 1.00 | 0.00 |
| ATOM | 846 | O    | LEU | A | 92 | 49.740 | 31.893 | 3.193  | 1.00 | 0.00 |
| ATOM | 847 | CB   | LEU | A | 92 | 48.192 | 32.950 | 5.942  | 1.00 | 0.00 |
| ATOM | 848 | CG   | LEU | A | 92 | 49.479 | 32.430 | 6.580  | 1.00 | 0.00 |
| ATOM | 849 | CD1  | LEU | A | 92 | 50.560 | 33.508 | 6.618  | 1.00 | 0.00 |
| ATOM | 850 | CD2  | LEU | A | 92 | 49.221 | 31.842 | 7.968  | 1.00 | 0.00 |
| ATOM | 851 | H    | LEU | A | 92 | 46.368 | 34.186 | 4.778  | 1.00 | 0.00 |
| ATOM | 852 | HA   | LEU | A | 92 | 49.157 | 34.025 | 4.325  | 1.00 | 0.00 |
| ATOM | 853 | 1HB  | LEU | A | 92 | 47.927 | 33.917 | 6.368  | 1.00 | 0.00 |
| ATOM | 854 | 2HB  | LEU | A | 92 | 47.375 | 32.246 | 6.103  | 1.00 | 0.00 |
| ATOM | 855 | HG   | LEU | A | 92 | 49.845 | 31.616 | 5.954  | 1.00 | 0.00 |
| ATOM | 856 | 1HD1 | LEU | A | 92 | 51.462 | 33.104 | 7.078  | 1.00 | 0.00 |
| ATOM | 857 | 2HD1 | LEU | A | 92 | 50.786 | 33.832 | 5.602  | 1.00 | 0.00 |
| ATOM | 858 | 3HD1 | LEU | A | 92 | 50.206 | 34.358 | 7.201  | 1.00 | 0.00 |
| ATOM | 859 | 1HD2 | LEU | A | 92 | 50.160 | 31.482 | 8.390  | 1.00 | 0.00 |
| ATOM | 860 | 2HD2 | LEU | A | 92 | 48.802 | 32.611 | 8.617  | 1.00 | 0.00 |
| ATOM | 861 | 3HD2 | LEU | A | 92 | 48.518 | 31.013 | 7.887  | 1.00 | 0.00 |
| ATOM | 862 | N    | SER | A | 93 | 47.562 | 31.348 | 3.299  | 1.00 | 0.00 |
| ATOM | 863 | CA   | SER | A | 93 | 47.716 | 30.146 | 2.487  | 1.00 | 0.00 |
| ATOM | 864 | C    | SER | A | 93 | 48.357 | 30.406 | 1.121  | 1.00 | 0.00 |
| ATOM | 865 | O    | SER | A | 93 | 48.612 | 29.468 | 0.362  | 1.00 | 0.00 |
| ATOM | 866 | CB   | SER | A | 93 | 46.363 | 29.487 | 2.305  | 1.00 | 0.00 |
| ATOM | 867 | OG   | SER | A | 93 | 45.575 | 30.155 | 1.357  | 1.00 | 0.00 |
| ATOM | 868 | H    | SER | A | 93 | 46.645 | 31.595 | 3.643  | 1.00 | 0.00 |
| ATOM | 869 | HA   | SER | A | 93 | 48.284 | 29.358 | 2.983  | 1.00 | 0.00 |
| ATOM | 870 | 1HB  | SER | A | 93 | 46.517 | 28.460 | 1.976  | 1.00 | 0.00 |
| ATOM | 871 | 2HB  | SER | A | 93 | 45.842 | 29.487 | 3.261  | 1.00 | 0.00 |
| ATOM | 872 | HG   | SER | A | 93 | 45.685 | 31.103 | 1.462  | 1.00 | 0.00 |
| ATOM | 873 | N    | LEU | A | 94 | 48.612 | 31.671 | 0.802  | 1.00 | 0.00 |
| ATOM | 874 | CA   | LEU | A | 94 | 49.245 | 32.004 | -0.465 | 1.00 | 0.00 |
| ATOM | 875 | C    | LEU | A | 94 | 50.732 | 31.683 | -0.390 | 1.00 | 0.00 |
| ATOM | 876 | O    | LEU | A | 94 | 51.312 | 31.142 | -1.329 | 1.00 | 0.00 |
| ATOM | 877 | CB   | LEU | A | 94 | 49.023 | 33.482 | -0.809 | 1.00 | 0.00 |
| ATOM | 878 | CG   | LEU | A | 94 | 47.610 | 33.834 | -1.294 | 1.00 | 0.00 |

PEDF\_P1\_final\_docking\_model.txt

|      |     |      |     |   |    |        |        |        |      |      |
|------|-----|------|-----|---|----|--------|--------|--------|------|------|
| ATOM | 879 | CD1  | LEU | A | 94 | 47.474 | 35.343 | -1.453 | 1.00 | 0.00 |
| ATOM | 880 | CD2  | LEU | A | 94 | 47.333 | 33.125 | -2.611 | 1.00 | 0.00 |
| ATOM | 881 | H    | LEU | A | 94 | 48.367 | 32.415 | 1.440  | 1.00 | 0.00 |
| ATOM | 882 | HA   | LEU | A | 94 | 48.817 | 31.393 | -1.259 | 1.00 | 0.00 |
| ATOM | 883 | 1HB  | LEU | A | 94 | 49.202 | 33.921 | 0.171  | 1.00 | 0.00 |
| ATOM | 884 | 2HB  | LEU | A | 94 | 49.769 | 33.849 | -1.513 | 1.00 | 0.00 |
| ATOM | 885 | HG   | LEU | A | 94 | 46.909 | 33.449 | -0.553 | 1.00 | 0.00 |
| ATOM | 886 | 1HD1 | LEU | A | 94 | 46.468 | 35.583 | -1.798 | 1.00 | 0.00 |
| ATOM | 887 | 2HD1 | LEU | A | 94 | 47.654 | 35.828 | -0.494 | 1.00 | 0.00 |
| ATOM | 888 | 3HD1 | LEU | A | 94 | 48.201 | 35.698 | -2.183 | 1.00 | 0.00 |
| ATOM | 889 | 1HD2 | LEU | A | 94 | 46.329 | 33.376 | -2.954 | 1.00 | 0.00 |
| ATOM | 890 | 2HD2 | LEU | A | 94 | 48.062 | 33.444 | -3.357 | 1.00 | 0.00 |
| ATOM | 891 | 3HD2 | LEU | A | 94 | 47.408 | 32.047 | -2.467 | 1.00 | 0.00 |
| ATOM | 892 | N    | GLY | A | 95 | 51.350 | 32.014 | 0.735  | 1.00 | 0.00 |
| ATOM | 893 | CA   | GLY | A | 95 | 52.767 | 31.746 | 0.886  | 1.00 | 0.00 |
| ATOM | 894 | C    | GLY | A | 95 | 52.998 | 30.430 | 1.590  | 1.00 | 0.00 |
| ATOM | 895 | O    | GLY | A | 95 | 53.922 | 30.311 | 2.391  | 1.00 | 0.00 |
| ATOM | 896 | H    | GLY | A | 95 | 50.849 | 32.452 | 1.494  | 1.00 | 0.00 |
| ATOM | 897 | 1HA  | GLY | A | 95 | 53.230 | 31.709 | -0.100 | 1.00 | 0.00 |
| ATOM | 898 | 2HA  | GLY | A | 95 | 53.221 | 32.547 | 1.469  | 1.00 | 0.00 |
| ATOM | 899 | N    | ALA | A | 96 | 52.156 | 29.443 | 1.295  | 1.00 | 0.00 |
| ATOM | 900 | CA   | ALA | A | 96 | 52.272 | 28.127 | 1.916  | 1.00 | 0.00 |
| ATOM | 901 | C    | ALA | A | 96 | 52.518 | 27.062 | 0.864  | 1.00 | 0.00 |
| ATOM | 902 | O    | ALA | A | 96 | 52.180 | 27.244 | -0.307 | 1.00 | 0.00 |
| ATOM | 903 | CB   | ALA | A | 96 | 50.986 | 27.768 | 2.661  | 1.00 | 0.00 |
| ATOM | 904 | H    | ALA | A | 96 | 51.418 | 29.608 | 0.625  | 1.00 | 0.00 |
| ATOM | 905 | HA   | ALA | A | 96 | 53.128 | 28.133 | 2.591  | 1.00 | 0.00 |
| ATOM | 906 | 1HB  | ALA | A | 96 | 51.093 | 26.784 | 3.117  | 1.00 | 0.00 |
| ATOM | 907 | 2HB  | ALA | A | 96 | 50.796 | 28.508 | 3.438  | 1.00 | 0.00 |
| ATOM | 908 | 3HB  | ALA | A | 96 | 50.152 | 27.754 | 1.961  | 1.00 | 0.00 |
| ATOM | 909 | N    | ASP | A | 97 | 53.101 | 25.943 | 1.280  | 1.00 | 0.00 |
| ATOM | 910 | CA   | ASP | A | 97 | 53.373 | 24.874 | 0.339  | 1.00 | 0.00 |
| ATOM | 911 | C    | ASP | A | 97 | 52.367 | 23.730 | 0.463  | 1.00 | 0.00 |
| ATOM | 912 | O    | ASP | A | 97 | 51.745 | 23.539 | 1.513  | 1.00 | 0.00 |
| ATOM | 913 | CB   | ASP | A | 97 | 54.796 | 24.347 | 0.540  | 1.00 | 0.00 |
| ATOM | 914 | CG   | ASP | A | 97 | 55.314 | 23.484 | -0.602 | 1.00 | 0.00 |
| ATOM | 915 | OD1  | ASP | A | 97 | 54.644 | 23.393 | -1.604 | 1.00 | 0.00 |
| ATOM | 916 | OD2  | ASP | A | 97 | 56.440 | 23.052 | -0.530 | 1.00 | 0.00 |
| ATOM | 917 | H    | ASP | A | 97 | 53.360 | 25.823 | 2.249  | 1.00 | 0.00 |
| ATOM | 918 | HA   | ASP | A | 97 | 53.277 | 25.247 | -0.681 | 1.00 | 0.00 |
| ATOM | 919 | 1HB  | ASP | A | 97 | 55.522 | 25.129 | 0.762  | 1.00 | 0.00 |
| ATOM | 920 | 2HB  | ASP | A | 97 | 54.647 | 23.726 | 1.425  | 1.00 | 0.00 |
| ATOM | 921 | N    | GLU | A | 98 | 52.221 | 22.985 | -0.630 | 1.00 | 0.00 |
| ATOM | 922 | CA   | GLU | A | 98 | 51.319 | 21.843 | -0.723 | 1.00 | 0.00 |
| ATOM | 923 | C    | GLU | A | 98 | 50.702 | 21.355 | 0.580  | 1.00 | 0.00 |
| ATOM | 924 | O    | GLU | A | 98 | 49.563 | 21.687 | 0.887  | 1.00 | 0.00 |
| ATOM | 925 | CB   | GLU | A | 98 | 52.059 | 20.677 | -1.382 | 1.00 | 0.00 |
| ATOM | 926 | CG   | GLU | A | 98 | 51.208 | 19.435 | -1.600 | 1.00 | 0.00 |
| ATOM | 927 | CD   | GLU | A | 98 | 52.050 | 18.264 | -2.027 | 1.00 | 0.00 |
| ATOM | 928 | OE1  | GLU | A | 98 | 53.240 | 18.425 | -2.148 | 1.00 | 0.00 |
| ATOM | 929 | OE2  | GLU | A | 98 | 51.521 | 17.182 | -2.123 | 1.00 | 0.00 |
| ATOM | 930 | H    | GLU | A | 98 | 52.776 | 23.240 | -1.434 | 1.00 | 0.00 |
| ATOM | 931 | HA   | GLU | A | 98 | 50.449 | 22.107 | -1.326 | 1.00 | 0.00 |
| ATOM | 932 | 1HB  | GLU | A | 98 | 52.428 | 21.037 | -2.343 | 1.00 | 0.00 |
| ATOM | 933 | 2HB  | GLU | A | 98 | 52.903 | 20.430 | -0.738 | 1.00 | 0.00 |
| ATOM | 934 | 1HG  | GLU | A | 98 | 50.616 | 19.156 | -0.729 | 1.00 | 0.00 |
| ATOM | 935 | 2HG  | GLU | A | 98 | 50.543 | 19.719 | -2.415 | 1.00 | 0.00 |
| ATOM | 936 | N    | ARG | A | 99 | 51.456 | 20.560 | 1.335  | 1.00 | 0.00 |
| ATOM | 937 | CA   | ARG | A | 99 | 50.976 | 19.990 | 2.589  | 1.00 | 0.00 |
| ATOM | 938 | C    | ARG | A | 99 | 50.323 | 20.992 | 3.537  | 1.00 | 0.00 |
| ATOM | 939 | O    | ARG | A | 99 | 49.246 | 20.719 | 4.067  | 1.00 | 0.00 |
| ATOM | 940 | CB   | ARG | A | 99 | 52.083 | 19.225 | 3.300  | 1.00 | 0.00 |
| ATOM | 941 | CG   | ARG | A | 99 | 52.483 | 17.916 | 2.638  | 1.00 | 0.00 |

PEDF\_P1\_final\_docking\_model.txt

|      |      |      |     |   |     |        |        |        |      |      |
|------|------|------|-----|---|-----|--------|--------|--------|------|------|
| ATOM | 942  | CD   | ARG | A | 99  | 53.596 | 17.203 | 3.315  | 1.00 | 0.00 |
| ATOM | 943  | NE   | ARG | A | 99  | 54.008 | 15.971 | 2.662  | 1.00 | 0.00 |
| ATOM | 944  | CZ   | ARG | A | 99  | 55.068 | 15.226 | 3.032  | 1.00 | 0.00 |
| ATOM | 945  | NH1  | ARG | A | 99  | 55.847 | 15.601 | 4.023  | 1.00 | 0.00 |
| ATOM | 946  | NH2  | ARG | A | 99  | 55.320 | 14.119 | 2.356  | 1.00 | 0.00 |
| ATOM | 947  | H    | ARG | A | 99  | 52.393 | 20.347 | 1.024  | 1.00 | 0.00 |
| ATOM | 948  | HA   | ARG | A | 99  | 50.191 | 19.261 | 2.386  | 1.00 | 0.00 |
| ATOM | 949  | 1HB  | ARG | A | 99  | 52.948 | 19.885 | 3.343  | 1.00 | 0.00 |
| ATOM | 950  | 2HB  | ARG | A | 99  | 51.730 | 19.023 | 4.311  | 1.00 | 0.00 |
| ATOM | 951  | 1HG  | ARG | A | 99  | 51.617 | 17.254 | 2.628  | 1.00 | 0.00 |
| ATOM | 952  | 2HG  | ARG | A | 99  | 52.791 | 18.126 | 1.614  | 1.00 | 0.00 |
| ATOM | 953  | 1HD  | ARG | A | 99  | 54.465 | 17.859 | 3.353  | 1.00 | 0.00 |
| ATOM | 954  | 2HD  | ARG | A | 99  | 53.289 | 16.948 | 4.329  | 1.00 | 0.00 |
| ATOM | 955  | HE   | ARG | A | 99  | 53.599 | 15.493 | 1.870  | 1.00 | 0.00 |
| ATOM | 956  | 1HH1 | ARG | A | 99  | 55.651 | 16.460 | 4.518  | 1.00 | 0.00 |
| ATOM | 957  | 2HH1 | ARG | A | 99  | 56.636 | 15.029 | 4.285  | 1.00 | 0.00 |
| ATOM | 958  | 1HH2 | ARG | A | 99  | 54.722 | 13.854 | 1.585  | 1.00 | 0.00 |
| ATOM | 959  | 2HH2 | ARG | A | 99  | 56.108 | 13.543 | 2.612  | 1.00 | 0.00 |
| ATOM | 960  | N    | THR | A | 100 | 50.961 | 22.141 | 3.752  | 1.00 | 0.00 |
| ATOM | 961  | CA   | THR | A | 100 | 50.419 | 23.159 | 4.655  | 1.00 | 0.00 |
| ATOM | 962  | C    | THR | A | 100 | 49.189 | 23.837 | 4.056  | 1.00 | 0.00 |
| ATOM | 963  | O    | THR | A | 100 | 48.175 | 24.042 | 4.730  | 1.00 | 0.00 |
| ATOM | 964  | CB   | THR | A | 100 | 51.469 | 24.234 | 4.990  | 1.00 | 0.00 |
| ATOM | 965  | OG1  | THR | A | 100 | 52.583 | 23.626 | 5.657  | 1.00 | 0.00 |
| ATOM | 966  | CG2  | THR | A | 100 | 50.869 | 25.305 | 5.888  | 1.00 | 0.00 |
| ATOM | 967  | H    | THR | A | 100 | 51.838 | 22.316 | 3.283  | 1.00 | 0.00 |
| ATOM | 968  | HA   | THR | A | 100 | 50.090 | 22.691 | 5.583  | 1.00 | 0.00 |
| ATOM | 969  | HB   | THR | A | 100 | 51.817 | 24.690 | 4.064  | 1.00 | 0.00 |
| ATOM | 970  | HG1  | THR | A | 100 | 52.778 | 22.780 | 5.247  | 1.00 | 0.00 |
| ATOM | 971  | 1HG2 | THR | A | 100 | 51.626 | 26.056 | 6.113  | 1.00 | 0.00 |
| ATOM | 972  | 2HG2 | THR | A | 100 | 50.029 | 25.777 | 5.378  | 1.00 | 0.00 |
| ATOM | 973  | 3HG2 | THR | A | 100 | 50.522 | 24.849 | 6.814  | 1.00 | 0.00 |
| ATOM | 974  | N    | GLU | A | 101 | 49.292 | 24.180 | 2.778  | 1.00 | 0.00 |
| ATOM | 975  | CA   | GLU | A | 101 | 48.197 | 24.817 | 2.055  | 1.00 | 0.00 |
| ATOM | 976  | C    | GLU | A | 101 | 46.912 | 23.997 | 2.177  | 1.00 | 0.00 |
| ATOM | 977  | O    | GLU | A | 101 | 45.854 | 24.542 | 2.484  | 1.00 | 0.00 |
| ATOM | 978  | CB   | GLU | A | 101 | 48.566 | 25.007 | 0.582  | 1.00 | 0.00 |
| ATOM | 979  | CG   | GLU | A | 101 | 47.498 | 25.703 | -0.249 | 1.00 | 0.00 |
| ATOM | 980  | CD   | GLU | A | 101 | 47.963 | 25.924 | -1.662 | 1.00 | 0.00 |
| ATOM | 981  | OE1  | GLU | A | 101 | 48.336 | 24.970 | -2.301 | 1.00 | 0.00 |
| ATOM | 982  | OE2  | GLU | A | 101 | 47.840 | 27.027 | -2.140 | 1.00 | 0.00 |
| ATOM | 983  | H    | GLU | A | 101 | 50.158 | 23.992 | 2.293  | 1.00 | 0.00 |
| ATOM | 984  | HA   | GLU | A | 101 | 47.986 | 25.795 | 2.490  | 1.00 | 0.00 |
| ATOM | 985  | 1HB  | GLU | A | 101 | 49.484 | 25.594 | 0.557  | 1.00 | 0.00 |
| ATOM | 986  | 2HB  | GLU | A | 101 | 48.757 | 24.015 | 0.171  | 1.00 | 0.00 |
| ATOM | 987  | 1HG  | GLU | A | 101 | 46.545 | 25.174 | -0.260 | 1.00 | 0.00 |
| ATOM | 988  | 2HG  | GLU | A | 101 | 47.373 | 26.664 | 0.247  | 1.00 | 0.00 |
| ATOM | 989  | N    | SER | A | 102 | 47.020 | 22.690 | 1.931  | 1.00 | 0.00 |
| ATOM | 990  | CA   | SER | A | 102 | 45.886 | 21.773 | 2.011  | 1.00 | 0.00 |
| ATOM | 991  | C    | SER | A | 102 | 45.248 | 21.821 | 3.384  | 1.00 | 0.00 |
| ATOM | 992  | O    | SER | A | 102 | 44.026 | 21.949 | 3.497  | 1.00 | 0.00 |
| ATOM | 993  | CB   | SER | A | 102 | 46.326 | 20.359 | 1.685  | 1.00 | 0.00 |
| ATOM | 994  | OG   | SER | A | 102 | 45.266 | 19.446 | 1.767  | 1.00 | 0.00 |
| ATOM | 995  | H    | SER | A | 102 | 47.929 | 22.328 | 1.679  | 1.00 | 0.00 |
| ATOM | 996  | HA   | SER | A | 102 | 45.134 | 21.946 | 1.240  | 1.00 | 0.00 |
| ATOM | 997  | 1HB  | SER | A | 102 | 46.729 | 20.345 | 0.672  | 1.00 | 0.00 |
| ATOM | 998  | 2HB  | SER | A | 102 | 47.104 | 20.064 | 2.388  | 1.00 | 0.00 |
| ATOM | 999  | HG   | SER | A | 102 | 45.487 | 18.655 | 1.269  | 1.00 | 0.00 |
| ATOM | 1000 | N    | ILE | A | 103 | 46.073 | 21.708 | 4.425  | 1.00 | 0.00 |
| ATOM | 1001 | CA   | ILE | A | 103 | 45.576 | 21.768 | 5.794  | 1.00 | 0.00 |
| ATOM | 1002 | C    | ILE | A | 103 | 44.639 | 22.972 | 5.901  | 1.00 | 0.00 |
| ATOM | 1003 | O    | ILE | A | 103 | 43.522 | 22.859 | 6.406  | 1.00 | 0.00 |
| ATOM | 1004 | CB   | ILE | A | 103 | 46.713 | 21.890 | 6.825  | 1.00 | 0.00 |



PEDF\_P1\_final\_docking\_model.txt

|      |      |      |     |   |     |        |        |        |      |      |
|------|------|------|-----|---|-----|--------|--------|--------|------|------|
| ATOM | 1005 | CG1  | ILE | A | 103 | 47.479 | 20.570 | 6.934  | 1.00 | 0.00 |
| ATOM | 1006 | CG2  | ILE | A | 103 | 46.159 | 22.301 | 8.181  | 1.00 | 0.00 |
| ATOM | 1007 | CD1  | ILE | A | 103 | 46.643 | 19.419 | 7.446  | 1.00 | 0.00 |
| ATOM | 1008 | H    | ILE | A | 103 | 47.062 | 21.578 | 4.266  | 1.00 | 0.00 |
| ATOM | 1009 | HA   | ILE | A | 103 | 44.981 | 20.885 | 6.026  | 1.00 | 0.00 |
| ATOM | 1010 | HB   | ILE | A | 103 | 47.425 | 22.639 | 6.481  | 1.00 | 0.00 |
| ATOM | 1011 | 1HG1 | ILE | A | 103 | 47.857 | 20.331 | 5.941  | 1.00 | 0.00 |
| ATOM | 1012 | 2HG1 | ILE | A | 103 | 48.318 | 20.737 | 7.610  | 1.00 | 0.00 |
| ATOM | 1013 | 1HG2 | ILE | A | 103 | 46.975 | 22.383 | 8.898  | 1.00 | 0.00 |
| ATOM | 1014 | 2HG2 | ILE | A | 103 | 45.657 | 23.264 | 8.092  | 1.00 | 0.00 |
| ATOM | 1015 | 3HG2 | ILE | A | 103 | 45.447 | 21.552 | 8.526  | 1.00 | 0.00 |
| ATOM | 1016 | 1HD1 | ILE | A | 103 | 47.255 | 18.518 | 7.496  | 1.00 | 0.00 |
| ATOM | 1017 | 2HD1 | ILE | A | 103 | 46.265 | 19.656 | 8.441  | 1.00 | 0.00 |
| ATOM | 1018 | 3HD1 | ILE | A | 103 | 45.805 | 19.249 | 6.771  | 1.00 | 0.00 |
| ATOM | 1019 | N    | ILE | A | 104 | 45.092 | 24.119 | 5.406  | 1.00 | 0.00 |
| ATOM | 1020 | CA   | ILE | A | 104 | 44.281 | 25.329 | 5.457  | 1.00 | 0.00 |
| ATOM | 1021 | C    | ILE | A | 104 | 43.056 | 25.221 | 4.555  | 1.00 | 0.00 |
| ATOM | 1022 | O    | ILE | A | 104 | 41.927 | 25.433 | 5.003  | 1.00 | 0.00 |
| ATOM | 1023 | CB   | ILE | A | 104 | 45.097 | 26.570 | 5.050  | 1.00 | 0.00 |
| ATOM | 1024 | CG1  | ILE | A | 104 | 46.184 | 26.858 | 6.089  | 1.00 | 0.00 |
| ATOM | 1025 | CG2  | ILE | A | 104 | 44.184 | 27.774 | 4.881  | 1.00 | 0.00 |
| ATOM | 1026 | CD1  | ILE | A | 104 | 47.198 | 27.886 | 5.643  | 1.00 | 0.00 |
| ATOM | 1027 | H    | ILE | A | 104 | 46.010 | 24.159 | 4.987  | 1.00 | 0.00 |
| ATOM | 1028 | HA   | ILE | A | 104 | 43.871 | 25.475 | 6.456  | 1.00 | 0.00 |
| ATOM | 1029 | HB   | ILE | A | 104 | 45.608 | 26.366 | 4.110  | 1.00 | 0.00 |
| ATOM | 1030 | 1HG1 | ILE | A | 104 | 45.684 | 27.209 | 6.992  | 1.00 | 0.00 |
| ATOM | 1031 | 2HG1 | ILE | A | 104 | 46.690 | 25.916 | 6.298  | 1.00 | 0.00 |
| ATOM | 1032 | 1HG2 | ILE | A | 104 | 44.777 | 28.643 | 4.594  | 1.00 | 0.00 |
| ATOM | 1033 | 2HG2 | ILE | A | 104 | 43.447 | 27.567 | 4.106  | 1.00 | 0.00 |
| ATOM | 1034 | 3HG2 | ILE | A | 104 | 43.674 | 27.979 | 5.822  | 1.00 | 0.00 |
| ATOM | 1035 | 1HD1 | ILE | A | 104 | 47.936 | 28.037 | 6.431  | 1.00 | 0.00 |
| ATOM | 1036 | 2HD1 | ILE | A | 104 | 47.699 | 27.536 | 4.740  | 1.00 | 0.00 |
| ATOM | 1037 | 3HD1 | ILE | A | 104 | 46.694 | 28.829 | 5.434  | 1.00 | 0.00 |
| ATOM | 1038 | N    | HIS | A | 105 | 43.270 | 24.887 | 3.289  | 1.00 | 0.00 |
| ATOM | 1039 | CA   | HIS | A | 105 | 42.154 | 24.780 | 2.358  | 1.00 | 0.00 |
| ATOM | 1040 | C    | HIS | A | 105 | 41.039 | 23.865 | 2.827  | 1.00 | 0.00 |
| ATOM | 1041 | O    | HIS | A | 105 | 39.870 | 24.105 | 2.526  | 1.00 | 0.00 |
| ATOM | 1042 | CB   | HIS | A | 105 | 42.657 | 24.299 | 0.993  | 1.00 | 0.00 |
| ATOM | 1043 | CG   | HIS | A | 105 | 43.330 | 25.368 | 0.189  | 1.00 | 0.00 |
| ATOM | 1044 | ND1  | HIS | A | 105 | 43.760 | 25.166 | -1.105 | 1.00 | 0.00 |
| ATOM | 1045 | CD2  | HIS | A | 105 | 43.647 | 26.648 | 0.496  | 1.00 | 0.00 |
| ATOM | 1046 | CE1  | HIS | A | 105 | 44.313 | 26.277 | -1.561 | 1.00 | 0.00 |
| ATOM | 1047 | NE2  | HIS | A | 105 | 44.257 | 27.190 | -0.609 | 1.00 | 0.00 |
| ATOM | 1048 | H    | HIS | A | 105 | 44.206 | 24.704 | 2.958  | 1.00 | 0.00 |
| ATOM | 1049 | HA   | HIS | A | 105 | 41.681 | 25.754 | 2.240  | 1.00 | 0.00 |
| ATOM | 1050 | 1HB  | HIS | A | 105 | 43.388 | 23.500 | 1.122  | 1.00 | 0.00 |
| ATOM | 1051 | 2HB  | HIS | A | 105 | 41.824 | 23.935 | 0.393  | 1.00 | 0.00 |
| ATOM | 1052 | HD2  | HIS | A | 105 | 43.507 | 27.251 | 1.393  | 1.00 | 0.00 |
| ATOM | 1053 | HE1  | HIS | A | 105 | 44.716 | 26.322 | -2.572 | 1.00 | 0.00 |
| ATOM | 1054 | HE2  | HIS | A | 105 | 44.604 | 28.137 | -0.673 | 1.00 | 0.00 |
| ATOM | 1055 | N    | ARG | A | 106 | 41.394 | 22.820 | 3.565  | 1.00 | 0.00 |
| ATOM | 1056 | CA   | ARG | A | 106 | 40.397 | 21.876 | 4.031  | 1.00 | 0.00 |
| ATOM | 1057 | C    | ARG | A | 106 | 39.534 | 22.421 | 5.163  | 1.00 | 0.00 |
| ATOM | 1058 | O    | ARG | A | 106 | 38.377 | 22.029 | 5.306  | 1.00 | 0.00 |
| ATOM | 1059 | CB   | ARG | A | 106 | 41.030 | 20.547 | 4.417  | 1.00 | 0.00 |
| ATOM | 1060 | CG   | ARG | A | 106 | 41.605 | 19.751 | 3.256  | 1.00 | 0.00 |
| ATOM | 1061 | CD   | ARG | A | 106 | 42.286 | 18.493 | 3.654  | 1.00 | 0.00 |
| ATOM | 1062 | NE   | ARG | A | 106 | 41.409 | 17.493 | 4.243  | 1.00 | 0.00 |
| ATOM | 1063 | CZ   | ARG | A | 106 | 41.832 | 16.363 | 4.842  | 1.00 | 0.00 |
| ATOM | 1064 | NH1  | ARG | A | 106 | 43.111 | 16.064 | 4.900  | 1.00 | 0.00 |
| ATOM | 1065 | NH2  | ARG | A | 106 | 40.923 | 15.548 | 5.348  | 1.00 | 0.00 |
| ATOM | 1066 | H    | ARG | A | 106 | 42.363 | 22.673 | 3.809  | 1.00 | 0.00 |
| ATOM | 1067 | HA   | ARG | A | 106 | 39.699 | 21.648 | 3.225  | 1.00 | 0.00 |

PEDF\_P1\_final\_docking\_model.txt

|      |      |      |     |   |     |        |        |        |      |      |
|------|------|------|-----|---|-----|--------|--------|--------|------|------|
| ATOM | 1068 | 1HB  | ARG | A | 106 | 41.823 | 20.768 | 5.129  | 1.00 | 0.00 |
| ATOM | 1069 | 2HB  | ARG | A | 106 | 40.255 | 19.957 | 4.907  | 1.00 | 0.00 |
| ATOM | 1070 | 1HG  | ARG | A | 106 | 40.792 | 19.493 | 2.576  | 1.00 | 0.00 |
| ATOM | 1071 | 2HG  | ARG | A | 106 | 42.330 | 20.376 | 2.734  | 1.00 | 0.00 |
| ATOM | 1072 | 1HD  | ARG | A | 106 | 42.745 | 18.045 | 2.773  | 1.00 | 0.00 |
| ATOM | 1073 | 2HD  | ARG | A | 106 | 43.057 | 18.724 | 4.388  | 1.00 | 0.00 |
| ATOM | 1074 | HE   | ARG | A | 106 | 40.400 | 17.475 | 4.301  | 1.00 | 0.00 |
| ATOM | 1075 | 1HH1 | ARG | A | 106 | 43.791 | 16.689 | 4.492  | 1.00 | 0.00 |
| ATOM | 1076 | 2HH1 | ARG | A | 106 | 43.407 | 15.212 | 5.353  | 1.00 | 0.00 |
| ATOM | 1077 | 1HH2 | ARG | A | 106 | 39.942 | 15.783 | 5.279  | 1.00 | 0.00 |
| ATOM | 1078 | 2HH2 | ARG | A | 106 | 41.212 | 14.693 | 5.801  | 1.00 | 0.00 |
| ATOM | 1079 | N    | ALA | A | 107 | 40.091 | 23.326 | 5.961  | 1.00 | 0.00 |
| ATOM | 1080 | CA   | ALA | A | 107 | 39.349 | 23.918 | 7.069  | 1.00 | 0.00 |
| ATOM | 1081 | C    | ALA | A | 107 | 38.432 | 25.023 | 6.545  | 1.00 | 0.00 |
| ATOM | 1082 | O    | ALA | A | 107 | 37.505 | 25.459 | 7.223  | 1.00 | 0.00 |
| ATOM | 1083 | CB   | ALA | A | 107 | 40.307 | 24.503 | 8.109  | 1.00 | 0.00 |
| ATOM | 1084 | H    | ALA | A | 107 | 41.046 | 23.612 | 5.800  | 1.00 | 0.00 |
| ATOM | 1085 | HA   | ALA | A | 107 | 38.727 | 23.147 | 7.525  | 1.00 | 0.00 |
| ATOM | 1086 | 1HB  | ALA | A | 107 | 39.733 | 24.939 | 8.926  | 1.00 | 0.00 |
| ATOM | 1087 | 2HB  | ALA | A | 107 | 40.949 | 23.713 | 8.498  | 1.00 | 0.00 |
| ATOM | 1088 | 3HB  | ALA | A | 107 | 40.920 | 25.274 | 7.645  | 1.00 | 0.00 |
| ATOM | 1089 | N    | LEU | A | 108 | 38.699 | 25.465 | 5.325  | 1.00 | 0.00 |
| ATOM | 1090 | CA   | LEU | A | 108 | 37.911 | 26.513 | 4.703  | 1.00 | 0.00 |
| ATOM | 1091 | C    | LEU | A | 108 | 36.908 | 25.948 | 3.711  | 1.00 | 0.00 |
| ATOM | 1092 | O    | LEU | A | 108 | 36.189 | 26.707 | 3.063  | 1.00 | 0.00 |
| ATOM | 1093 | CB   | LEU | A | 108 | 38.834 | 27.523 | 4.009  | 1.00 | 0.00 |
| ATOM | 1094 | CG   | LEU | A | 108 | 39.812 | 28.257 | 4.936  | 1.00 | 0.00 |
| ATOM | 1095 | CD1  | LEU | A | 108 | 40.737 | 29.148 | 4.118  | 1.00 | 0.00 |
| ATOM | 1096 | CD2  | LEU | A | 108 | 39.032 | 29.078 | 5.951  | 1.00 | 0.00 |
| ATOM | 1097 | H    | LEU | A | 108 | 39.472 | 25.062 | 4.815  | 1.00 | 0.00 |
| ATOM | 1098 | HA   | LEU | A | 108 | 37.327 | 27.030 | 5.463  | 1.00 | 0.00 |
| ATOM | 1099 | 1HB  | LEU | A | 108 | 39.378 | 26.844 | 3.354  | 1.00 | 0.00 |
| ATOM | 1100 | 2HB  | LEU | A | 108 | 38.272 | 28.236 | 3.407  | 1.00 | 0.00 |
| ATOM | 1101 | HG   | LEU | A | 108 | 40.373 | 27.498 | 5.481  | 1.00 | 0.00 |
| ATOM | 1102 | 1HD1 | LEU | A | 108 | 41.428 | 29.665 | 4.784  | 1.00 | 0.00 |
| ATOM | 1103 | 2HD1 | LEU | A | 108 | 41.302 | 28.537 | 3.414  | 1.00 | 0.00 |
| ATOM | 1104 | 3HD1 | LEU | A | 108 | 40.145 | 29.880 | 3.570  | 1.00 | 0.00 |
| ATOM | 1105 | 1HD2 | LEU | A | 108 | 39.728 | 29.598 | 6.610  | 1.00 | 0.00 |
| ATOM | 1106 | 2HD2 | LEU | A | 108 | 38.410 | 29.806 | 5.431  | 1.00 | 0.00 |
| ATOM | 1107 | 3HD2 | LEU | A | 108 | 38.398 | 28.418 | 6.544  | 1.00 | 0.00 |
| ATOM | 1108 | N    | TYR | A | 109 | 36.865 | 24.618 | 3.607  | 1.00 | 0.00 |
| ATOM | 1109 | CA   | TYR | A | 109 | 35.949 | 23.905 | 2.703  | 1.00 | 0.00 |
| ATOM | 1110 | C    | TYR | A | 109 | 36.218 | 24.136 | 1.223  | 1.00 | 0.00 |
| ATOM | 1111 | O    | TYR | A | 109 | 35.354 | 23.923 | 0.376  | 1.00 | 0.00 |
| ATOM | 1112 | CB   | TYR | A | 109 | 34.522 | 24.011 | 3.257  | 1.00 | 0.00 |
| ATOM | 1113 | CG   | TYR | A | 109 | 34.626 | 23.556 | 4.704  | 1.00 | 0.00 |
| ATOM | 1114 | CD1  | TYR | A | 109 | 35.123 | 22.287 | 4.986  | 1.00 | 0.00 |
| ATOM | 1115 | CD2  | TYR | A | 109 | 34.282 | 24.399 | 5.759  | 1.00 | 0.00 |
| ATOM | 1116 | CE1  | TYR | A | 109 | 35.341 | 21.889 | 6.302  | 1.00 | 0.00 |
| ATOM | 1117 | CE2  | TYR | A | 109 | 34.493 | 23.996 | 7.078  | 1.00 | 0.00 |
| ATOM | 1118 | CZ   | TYR | A | 109 | 35.046 | 22.747 | 7.356  | 1.00 | 0.00 |
| ATOM | 1119 | OH   | TYR | A | 109 | 35.308 | 22.348 | 8.662  | 1.00 | 0.00 |
| ATOM | 1120 | H    | TYR | A | 109 | 37.500 | 24.085 | 4.185  | 1.00 | 0.00 |
| ATOM | 1121 | HA   | TYR | A | 109 | 36.059 | 22.829 | 2.838  | 1.00 | 0.00 |
| ATOM | 1122 | 1HB  | TYR | A | 109 | 34.209 | 25.050 | 3.146  | 1.00 | 0.00 |
| ATOM | 1123 | 2HB  | TYR | A | 109 | 33.889 | 23.373 | 2.641  | 1.00 | 0.00 |
| ATOM | 1124 | HD1  | TYR | A | 109 | 35.337 | 21.610 | 4.159  | 1.00 | 0.00 |
| ATOM | 1125 | HD2  | TYR | A | 109 | 33.847 | 25.373 | 5.534  | 1.00 | 0.00 |
| ATOM | 1126 | HE1  | TYR | A | 109 | 35.730 | 20.895 | 6.519  | 1.00 | 0.00 |
| ATOM | 1127 | HE2  | TYR | A | 109 | 34.224 | 24.659 | 7.900  | 1.00 | 0.00 |
| ATOM | 1128 | HH   | TYR | A | 109 | 35.070 | 23.013 | 9.313  | 1.00 | 0.00 |
| ATOM | 1129 | N    | TYR | A | 110 | 37.430 | 24.571 | 0.923  | 1.00 | 0.00 |
| ATOM | 1130 | CA   | TYR | A | 110 | 37.824 | 24.826 | -0.445 | 1.00 | 0.00 |

PEDF\_P1\_final\_docking\_model.txt

|      |      |      |     |   |     |        |        |        |      |      |
|------|------|------|-----|---|-----|--------|--------|--------|------|------|
| ATOM | 1131 | C    | TYR | A | 110 | 37.948 | 23.525 | -1.234 | 1.00 | 0.00 |
| ATOM | 1132 | O    | TYR | A | 110 | 37.736 | 23.506 | -2.448 | 1.00 | 0.00 |
| ATOM | 1133 | CB   | TYR | A | 110 | 39.146 | 25.597 | -0.481 | 1.00 | 0.00 |
| ATOM | 1134 | CG   | TYR | A | 110 | 39.041 | 27.017 | 0.030  | 1.00 | 0.00 |
| ATOM | 1135 | CD1  | TYR | A | 110 | 37.806 | 27.628 | 0.189  | 1.00 | 0.00 |
| ATOM | 1136 | CD2  | TYR | A | 110 | 40.179 | 27.741 | 0.354  | 1.00 | 0.00 |
| ATOM | 1137 | CE1  | TYR | A | 110 | 37.705 | 28.925 | 0.654  | 1.00 | 0.00 |
| ATOM | 1138 | CE2  | TYR | A | 110 | 40.090 | 29.038 | 0.821  | 1.00 | 0.00 |
| ATOM | 1139 | CZ   | TYR | A | 110 | 38.851 | 29.627 | 0.970  | 1.00 | 0.00 |
| ATOM | 1140 | OH   | TYR | A | 110 | 38.757 | 30.918 | 1.436  | 1.00 | 0.00 |
| ATOM | 1141 | H    | TYR | A | 110 | 38.097 | 24.729 | 1.665  | 1.00 | 0.00 |
| ATOM | 1142 | HA   | TYR | A | 110 | 37.059 | 25.420 | -0.946 | 1.00 | 0.00 |
| ATOM | 1143 | 1HB  | TYR | A | 110 | 39.859 | 25.042 | 0.130  | 1.00 | 0.00 |
| ATOM | 1144 | 2HB  | TYR | A | 110 | 39.484 | 25.607 | -1.516 | 1.00 | 0.00 |
| ATOM | 1145 | HD1  | TYR | A | 110 | 36.906 | 27.067 | -0.063 | 1.00 | 0.00 |
| ATOM | 1146 | HD2  | TYR | A | 110 | 41.154 | 27.271 | 0.233  | 1.00 | 0.00 |
| ATOM | 1147 | HE1  | TYR | A | 110 | 36.728 | 29.393 | 0.774  | 1.00 | 0.00 |
| ATOM | 1148 | HE2  | TYR | A | 110 | 40.996 | 29.591 | 1.069  | 1.00 | 0.00 |
| ATOM | 1149 | HH   | TYR | A | 110 | 39.574 | 31.413 | 1.337  | 1.00 | 0.00 |
| ATOM | 1150 | N    | ASP | A | 111 | 38.304 | 22.441 | -0.548 | 1.00 | 0.00 |
| ATOM | 1151 | CA   | ASP | A | 111 | 38.461 | 21.154 | -1.217 | 1.00 | 0.00 |
| ATOM | 1152 | C    | ASP | A | 111 | 37.141 | 20.587 | -1.753 | 1.00 | 0.00 |
| ATOM | 1153 | O    | ASP | A | 111 | 37.101 | 19.496 | -2.321 | 1.00 | 0.00 |
| ATOM | 1154 | CB   | ASP | A | 111 | 39.105 | 20.147 | -0.260 | 1.00 | 0.00 |
| ATOM | 1155 | CG   | ASP | A | 111 | 38.243 | 19.780 | 0.940  | 1.00 | 0.00 |
| ATOM | 1156 | OD1  | ASP | A | 111 | 37.259 | 20.445 | 1.166  | 1.00 | 0.00 |
| ATOM | 1157 | OD2  | ASP | A | 111 | 38.482 | 18.751 | 1.525  | 1.00 | 0.00 |
| ATOM | 1158 | H    | ASP | A | 111 | 38.469 | 22.502 | 0.447  | 1.00 | 0.00 |
| ATOM | 1159 | HA   | ASP | A | 111 | 39.100 | 21.269 | -2.093 | 1.00 | 0.00 |
| ATOM | 1160 | 1HB  | ASP | A | 111 | 39.447 | 19.237 | -0.753 | 1.00 | 0.00 |
| ATOM | 1161 | 2HB  | ASP | A | 111 | 39.966 | 20.726 | 0.075  | 1.00 | 0.00 |
| ATOM | 1162 | N    | LEU | A | 112 | 36.063 | 21.342 | -1.579 | 1.00 | 0.00 |
| ATOM | 1163 | CA   | LEU | A | 112 | 34.756 | 20.922 | -2.058 | 1.00 | 0.00 |
| ATOM | 1164 | C    | LEU | A | 112 | 34.270 | 21.904 | -3.110 | 1.00 | 0.00 |
| ATOM | 1165 | O    | LEU | A | 112 | 33.089 | 21.928 | -3.452 | 1.00 | 0.00 |
| ATOM | 1166 | CB   | LEU | A | 112 | 33.757 | 20.825 | -0.898 | 1.00 | 0.00 |
| ATOM | 1167 | CG   | LEU | A | 112 | 34.104 | 19.788 | 0.178  | 1.00 | 0.00 |
| ATOM | 1168 | CD1  | LEU | A | 112 | 33.124 | 19.892 | 1.338  | 1.00 | 0.00 |
| ATOM | 1169 | CD2  | LEU | A | 112 | 34.074 | 18.394 | -0.430 | 1.00 | 0.00 |
| ATOM | 1170 | H    | LEU | A | 112 | 36.151 | 22.229 | -1.103 | 1.00 | 0.00 |
| ATOM | 1171 | HA   | LEU | A | 112 | 34.837 | 19.944 | -2.530 | 1.00 | 0.00 |
| ATOM | 1172 | 1HB  | LEU | A | 112 | 33.856 | 21.831 | -0.494 | 1.00 | 0.00 |
| ATOM | 1173 | 2HB  | LEU | A | 112 | 32.738 | 20.676 | -1.255 | 1.00 | 0.00 |
| ATOM | 1174 | HG   | LEU | A | 112 | 35.126 | 19.989 | 0.503  | 1.00 | 0.00 |
| ATOM | 1175 | 1HD1 | LEU | A | 112 | 33.379 | 19.153 | 2.098  | 1.00 | 0.00 |
| ATOM | 1176 | 2HD1 | LEU | A | 112 | 33.179 | 20.890 | 1.773  | 1.00 | 0.00 |
| ATOM | 1177 | 3HD1 | LEU | A | 112 | 32.113 | 19.708 | 0.978  | 1.00 | 0.00 |
| ATOM | 1178 | 1HD2 | LEU | A | 112 | 34.322 | 17.658 | 0.336  | 1.00 | 0.00 |
| ATOM | 1179 | 2HD2 | LEU | A | 112 | 33.078 | 18.189 | -0.823 | 1.00 | 0.00 |
| ATOM | 1180 | 3HD2 | LEU | A | 112 | 34.802 | 18.334 | -1.239 | 1.00 | 0.00 |
| ATOM | 1181 | N    | ILE | A | 113 | 35.194 | 22.715 | -3.615 | 1.00 | 0.00 |
| ATOM | 1182 | CA   | ILE | A | 113 | 34.893 | 23.700 | -4.649 | 1.00 | 0.00 |
| ATOM | 1183 | C    | ILE | A | 113 | 35.724 | 23.337 | -5.882 | 1.00 | 0.00 |
| ATOM | 1184 | O    | ILE | A | 113 | 36.950 | 23.491 | -5.885 | 1.00 | 0.00 |
| ATOM | 1185 | CB   | ILE | A | 113 | 35.207 | 25.139 | -4.202 | 1.00 | 0.00 |
| ATOM | 1186 | CG1  | ILE | A | 113 | 34.391 | 25.502 | -2.958 | 1.00 | 0.00 |
| ATOM | 1187 | CG2  | ILE | A | 113 | 34.929 | 26.120 | -5.331 | 1.00 | 0.00 |
| ATOM | 1188 | CD1  | ILE | A | 113 | 34.773 | 26.830 | -2.344 | 1.00 | 0.00 |
| ATOM | 1189 | H    | ILE | A | 113 | 36.139 | 22.642 | -3.265 | 1.00 | 0.00 |
| ATOM | 1190 | HA   | ILE | A | 113 | 33.845 | 23.642 | -4.941 | 1.00 | 0.00 |
| ATOM | 1191 | HB   | ILE | A | 113 | 36.257 | 25.202 | -3.917 | 1.00 | 0.00 |
| ATOM | 1192 | 1HG1 | ILE | A | 113 | 33.343 | 25.527 | -3.254 | 1.00 | 0.00 |
| ATOM | 1193 | 2HG1 | ILE | A | 113 | 34.543 | 24.707 | -2.228 | 1.00 | 0.00 |

PEDF\_P1\_final\_docking\_model.txt

|      |      |      |     |   |     |        |        |         |      |      |
|------|------|------|-----|---|-----|--------|--------|---------|------|------|
| ATOM | 1194 | 1HG2 | ILE | A | 113 | 35.155 | 27.132 | -4.997  | 1.00 | 0.00 |
| ATOM | 1195 | 2HG2 | ILE | A | 113 | 35.551 | 25.873 | -6.189  | 1.00 | 0.00 |
| ATOM | 1196 | 3HG2 | ILE | A | 113 | 33.878 | 26.059 | -5.615  | 1.00 | 0.00 |
| ATOM | 1197 | 1HD1 | ILE | A | 113 | 34.152 | 27.018 | -1.467  | 1.00 | 0.00 |
| ATOM | 1198 | 2HD1 | ILE | A | 113 | 35.822 | 26.806 | -2.046  | 1.00 | 0.00 |
| ATOM | 1199 | 3HD1 | ILE | A | 113 | 34.621 | 27.626 | -3.072  | 1.00 | 0.00 |
| ATOM | 1200 | N    | SER | A | 114 | 35.070 | 22.843 | -6.925  | 1.00 | 0.00 |
| ATOM | 1201 | CA   | SER | A | 114 | 35.789 | 22.468 | -8.135  | 1.00 | 0.00 |
| ATOM | 1202 | C    | SER | A | 114 | 35.930 | 23.672 | -9.069  | 1.00 | 0.00 |
| ATOM | 1203 | O    | SER | A | 114 | 35.434 | 23.666 | -10.196 | 1.00 | 0.00 |
| ATOM | 1204 | CB   | SER | A | 114 | 35.077 | 21.327 | -8.835  | 1.00 | 0.00 |
| ATOM | 1205 | OG   | SER | A | 114 | 33.735 | 21.629 | -9.102  | 1.00 | 0.00 |
| ATOM | 1206 | H    | SER | A | 114 | 34.068 | 22.722 | -6.891  | 1.00 | 0.00 |
| ATOM | 1207 | HA   | SER | A | 114 | 36.766 | 22.024 | -7.938  | 1.00 | 0.00 |
| ATOM | 1208 | 1HB  | SER | A | 114 | 35.588 | 21.123 | -9.776  | 1.00 | 0.00 |
| ATOM | 1209 | 2HB  | SER | A | 114 | 35.123 | 20.444 | -8.200  | 1.00 | 0.00 |
| ATOM | 1210 | HG   | SER | A | 114 | 33.321 | 20.883 | -9.544  | 1.00 | 0.00 |
| ATOM | 1211 | N    | SER | A | 115 | 36.622 | 24.703 | -8.592  | 1.00 | 0.00 |
| ATOM | 1212 | CA   | SER | A | 115 | 36.816 | 25.921 | -9.375  | 1.00 | 0.00 |
| ATOM | 1213 | C    | SER | A | 115 | 38.125 | 26.622 | -9.024  | 1.00 | 0.00 |
| ATOM | 1214 | O    | SER | A | 115 | 38.480 | 26.746 | -7.856  | 1.00 | 0.00 |
| ATOM | 1215 | CB   | SER | A | 115 | 35.646 | 26.862 | -9.165  | 1.00 | 0.00 |
| ATOM | 1216 | OG   | SER | A | 115 | 35.801 | 28.062 | -9.873  | 1.00 | 0.00 |
| ATOM | 1217 | H    | SER | A | 115 | 37.023 | 24.644 | -7.667  | 1.00 | 0.00 |
| ATOM | 1218 | HA   | SER | A | 115 | 36.772 | 25.755 | -10.452 | 1.00 | 0.00 |
| ATOM | 1219 | 1HB  | SER | A | 115 | 34.736 | 26.367 | -9.503  | 1.00 | 0.00 |
| ATOM | 1220 | 2HB  | SER | A | 115 | 35.563 | 27.085 | -8.103  | 1.00 | 0.00 |
| ATOM | 1221 | HG   | SER | A | 115 | 36.600 | 28.506 | -9.577  | 1.00 | 0.00 |
| ATOM | 1222 | N    | PRO | A | 116 | 38.858 | 27.092 | -10.043 | 1.00 | 0.00 |
| ATOM | 1223 | CA   | PRO | A | 116 | 40.138 | 27.786 | -9.872  | 1.00 | 0.00 |
| ATOM | 1224 | C    | PRO | A | 116 | 39.949 | 29.209 | -9.371  | 1.00 | 0.00 |
| ATOM | 1225 | O    | PRO | A | 116 | 38.880 | 29.568 | -8.867  | 1.00 | 0.00 |
| ATOM | 1226 | CB   | PRO | A | 116 | 40.770 | 27.753 | -11.267 | 1.00 | 0.00 |
| ATOM | 1227 | CG   | PRO | A | 116 | 39.609 | 27.772 | -12.202 | 1.00 | 0.00 |
| ATOM | 1228 | CD   | PRO | A | 116 | 38.522 | 26.999 | -11.504 | 1.00 | 0.00 |
| ATOM | 1229 | HA   | PRO | A | 116 | 40.782 | 27.311 | -9.118  | 1.00 | 0.00 |
| ATOM | 1230 | 1HB  | PRO | A | 116 | 41.429 | 28.618 | -11.432 | 1.00 | 0.00 |
| ATOM | 1231 | 2HB  | PRO | A | 116 | 41.382 | 26.850 | -11.411 | 1.00 | 0.00 |
| ATOM | 1232 | 1HG  | PRO | A | 116 | 39.288 | 28.802 | -12.415 | 1.00 | 0.00 |
| ATOM | 1233 | 2HG  | PRO | A | 116 | 39.867 | 27.309 | -13.166 | 1.00 | 0.00 |
| ATOM | 1234 | 1HD  | PRO | A | 116 | 37.526 | 27.430 | -11.681 | 1.00 | 0.00 |
| ATOM | 1235 | 2HD  | PRO | A | 116 | 38.481 | 25.950 | -11.832 | 1.00 | 0.00 |
| ATOM | 1236 | N    | ASP | A | 117 | 40.995 | 30.014 | -9.542  | 1.00 | 0.00 |
| ATOM | 1237 | CA   | ASP | A | 117 | 41.000 | 31.405 | -9.107  | 1.00 | 0.00 |
| ATOM | 1238 | C    | ASP | A | 117 | 40.127 | 31.547 | -7.865  | 1.00 | 0.00 |
| ATOM | 1239 | O    | ASP | A | 117 | 39.188 | 32.348 | -7.843  | 1.00 | 0.00 |
| ATOM | 1240 | CB   | ASP | A | 117 | 40.506 | 32.331 | -10.221 | 1.00 | 0.00 |
| ATOM | 1241 | CG   | ASP | A | 117 | 41.397 | 32.360 | -11.456 | 1.00 | 0.00 |
| ATOM | 1242 | OD1  | ASP | A | 117 | 42.578 | 32.567 | -11.308 | 1.00 | 0.00 |
| ATOM | 1243 | OD2  | ASP | A | 117 | 40.922 | 32.021 | -12.514 | 1.00 | 0.00 |
| ATOM | 1244 | H    | ASP | A | 117 | 41.816 | 29.637 | -9.993  | 1.00 | 0.00 |
| ATOM | 1245 | HA   | ASP | A | 117 | 42.013 | 31.704 | -8.836  | 1.00 | 0.00 |
| ATOM | 1246 | 1HB  | ASP | A | 117 | 39.476 | 32.138 | -10.521 | 1.00 | 0.00 |
| ATOM | 1247 | 2HB  | ASP | A | 117 | 40.563 | 33.293 | -9.710  | 1.00 | 0.00 |
| ATOM | 1248 | N    | ILE | A | 118 | 40.426 | 30.748 | -6.841  | 1.00 | 0.00 |
| ATOM | 1249 | CA   | ILE | A | 118 | 39.664 | 30.799 | -5.599  | 1.00 | 0.00 |
| ATOM | 1250 | C    | ILE | A | 118 | 39.950 | 32.143 | -4.916  | 1.00 | 0.00 |
| ATOM | 1251 | O    | ILE | A | 118 | 39.120 | 32.675 | -4.181  | 1.00 | 0.00 |
| ATOM | 1252 | CB   | ILE | A | 118 | 40.018 | 29.639 | -4.650  | 1.00 | 0.00 |
| ATOM | 1253 | CG1  | ILE | A | 118 | 38.861 | 29.365 | -3.687  | 1.00 | 0.00 |
| ATOM | 1254 | CG2  | ILE | A | 118 | 41.293 | 29.952 | -3.881  | 1.00 | 0.00 |
| ATOM | 1255 | CD1  | ILE | A | 118 | 37.604 | 28.873 | -4.367  | 1.00 | 0.00 |
| ATOM | 1256 | H    | ILE | A | 118 | 41.192 | 30.095 | -6.922  | 1.00 | 0.00 |

PEDF\_P1\_final\_docking\_model.txt

|      |      |      |     |   |     |        |        |        |      |      |
|------|------|------|-----|---|-----|--------|--------|--------|------|------|
| ATOM | 1257 | HA   | ILE | A | 118 | 38.594 | 30.777 | -5.804 | 1.00 | 0.00 |
| ATOM | 1258 | HB   | ILE | A | 118 | 40.161 | 28.732 | -5.236 | 1.00 | 0.00 |
| ATOM | 1259 | 1HG1 | ILE | A | 118 | 39.204 | 28.618 | -2.972 | 1.00 | 0.00 |
| ATOM | 1260 | 2HG1 | ILE | A | 118 | 38.648 | 30.297 | -3.162 | 1.00 | 0.00 |
| ATOM | 1261 | 1HG2 | ILE | A | 118 | 41.529 | 29.122 | -3.215 | 1.00 | 0.00 |
| ATOM | 1262 | 2HG2 | ILE | A | 118 | 42.114 | 30.099 | -4.582 | 1.00 | 0.00 |
| ATOM | 1263 | 3HG2 | ILE | A | 118 | 41.151 | 30.859 | -3.294 | 1.00 | 0.00 |
| ATOM | 1264 | 1HD1 | ILE | A | 118 | 36.828 | 28.701 | -3.620 | 1.00 | 0.00 |
| ATOM | 1265 | 2HD1 | ILE | A | 118 | 37.259 | 29.621 | -5.082 | 1.00 | 0.00 |
| ATOM | 1266 | 3HD1 | ILE | A | 118 | 37.814 | 27.941 | -4.891 | 1.00 | 0.00 |
| ATOM | 1267 | N    | HIS | A | 119 | 41.126 | 32.697 | -5.193 | 1.00 | 0.00 |
| ATOM | 1268 | CA   | HIS | A | 119 | 41.539 | 33.972 | -4.629 | 1.00 | 0.00 |
| ATOM | 1269 | C    | HIS | A | 119 | 40.981 | 35.125 | -5.450 | 1.00 | 0.00 |
| ATOM | 1270 | O    | HIS | A | 119 | 40.781 | 36.227 | -4.937 | 1.00 | 0.00 |
| ATOM | 1271 | CB   | HIS | A | 119 | 43.055 | 34.024 | -4.450 | 1.00 | 0.00 |
| ATOM | 1272 | CG   | HIS | A | 119 | 43.506 | 32.862 | -3.591 | 1.00 | 0.00 |
| ATOM | 1273 | ND1  | HIS | A | 119 | 43.151 | 32.682 | -2.304 | 1.00 | 0.00 |
| ATOM | 1274 | CD2  | HIS | A | 119 | 44.329 | 31.801 | -3.974 | 1.00 | 0.00 |
| ATOM | 1275 | CE1  | HIS | A | 119 | 43.740 | 31.520 | -1.874 | 1.00 | 0.00 |
| ATOM | 1276 | NE2  | HIS | A | 119 | 44.462 | 30.985 | -2.905 | 1.00 | 0.00 |
| ATOM | 1277 | H    | HIS | A | 119 | 41.752 | 32.210 | -5.819 | 1.00 | 0.00 |
| ATOM | 1278 | HA   | HIS | A | 119 | 41.135 | 34.075 | -3.622 | 1.00 | 0.00 |
| ATOM | 1279 | 1HB  | HIS | A | 119 | 43.551 | 33.955 | -5.419 | 1.00 | 0.00 |
| ATOM | 1280 | 2HB  | HIS | A | 119 | 43.343 | 34.954 | -3.960 | 1.00 | 0.00 |
| ATOM | 1281 | HD2  | HIS | A | 119 | 44.829 | 31.558 | -4.912 | 1.00 | 0.00 |
| ATOM | 1282 | HE1  | HIS | A | 119 | 43.592 | 31.167 | -0.854 | 1.00 | 0.00 |
| ATOM | 1283 | HE2  | HIS | A | 119 | 44.999 | 30.130 | -2.872 | 1.00 | 0.00 |
| ATOM | 1284 | N    | GLY | A | 120 | 40.735 | 34.866 | -6.730 | 1.00 | 0.00 |
| ATOM | 1285 | CA   | GLY | A | 120 | 40.188 | 35.892 | -7.601 | 1.00 | 0.00 |
| ATOM | 1286 | C    | GLY | A | 120 | 38.759 | 36.145 | -7.180 | 1.00 | 0.00 |
| ATOM | 1287 | O    | GLY | A | 120 | 38.280 | 37.285 | -7.168 | 1.00 | 0.00 |
| ATOM | 1288 | H    | GLY | A | 120 | 40.927 | 33.950 | -7.109 | 1.00 | 0.00 |
| ATOM | 1289 | 1HA  | GLY | A | 120 | 40.785 | 36.799 | -7.501 | 1.00 | 0.00 |
| ATOM | 1290 | 2HA  | GLY | A | 120 | 40.229 | 35.543 | -8.632 | 1.00 | 0.00 |
| ATOM | 1291 | N    | THR | A | 121 | 38.084 | 35.058 | -6.821 | 1.00 | 0.00 |
| ATOM | 1292 | CA   | THR | A | 121 | 36.700 | 35.104 | -6.373 | 1.00 | 0.00 |
| ATOM | 1293 | C    | THR | A | 121 | 36.611 | 35.797 | -5.009 | 1.00 | 0.00 |
| ATOM | 1294 | O    | THR | A | 121 | 35.715 | 36.609 | -4.767 | 1.00 | 0.00 |
| ATOM | 1295 | CB   | THR | A | 121 | 36.087 | 33.695 | -6.275 | 1.00 | 0.00 |
| ATOM | 1296 | OG1  | THR | A | 121 | 36.087 | 33.080 | -7.570 | 1.00 | 0.00 |
| ATOM | 1297 | CG2  | THR | A | 121 | 34.660 | 33.769 | -5.754 | 1.00 | 0.00 |
| ATOM | 1298 | H    | THR | A | 121 | 38.558 | 34.167 | -6.864 | 1.00 | 0.00 |
| ATOM | 1299 | HA   | THR | A | 121 | 36.106 | 35.694 | -7.071 | 1.00 | 0.00 |
| ATOM | 1300 | HB   | THR | A | 121 | 36.689 | 33.092 | -5.596 | 1.00 | 0.00 |
| ATOM | 1301 | HG1  | THR | A | 121 | 36.962 | 32.731 | -7.758 | 1.00 | 0.00 |
| ATOM | 1302 | 1HG2 | THR | A | 121 | 34.243 | 32.764 | -5.692 | 1.00 | 0.00 |
| ATOM | 1303 | 2HG2 | THR | A | 121 | 34.657 | 34.226 | -4.765 | 1.00 | 0.00 |
| ATOM | 1304 | 3HG2 | THR | A | 121 | 34.056 | 34.371 | -6.433 | 1.00 | 0.00 |
| ATOM | 1305 | N    | TYR | A | 122 | 37.551 | 35.474 | -4.125 | 1.00 | 0.00 |
| ATOM | 1306 | CA   | TYR | A | 122 | 37.576 | 36.051 | -2.793 | 1.00 | 0.00 |
| ATOM | 1307 | C    | TYR | A | 122 | 37.631 | 37.580 | -2.857 | 1.00 | 0.00 |
| ATOM | 1308 | O    | TYR | A | 122 | 37.030 | 38.281 | -2.036 | 1.00 | 0.00 |
| ATOM | 1309 | CB   | TYR | A | 122 | 38.801 | 35.518 | -2.051 | 1.00 | 0.00 |
| ATOM | 1310 | CG   | TYR | A | 122 | 38.498 | 35.315 | -0.588 | 1.00 | 0.00 |
| ATOM | 1311 | CD1  | TYR | A | 122 | 38.434 | 36.393 | 0.285  | 1.00 | 0.00 |
| ATOM | 1312 | CD2  | TYR | A | 122 | 38.289 | 34.028 | -0.115 | 1.00 | 0.00 |
| ATOM | 1313 | CE1  | TYR | A | 122 | 38.181 | 36.179 | 1.635  | 1.00 | 0.00 |
| ATOM | 1314 | CE2  | TYR | A | 122 | 38.034 | 33.817 | 1.232  | 1.00 | 0.00 |
| ATOM | 1315 | CZ   | TYR | A | 122 | 37.994 | 34.888 | 2.111  | 1.00 | 0.00 |
| ATOM | 1316 | OH   | TYR | A | 122 | 37.776 | 34.655 | 3.455  | 1.00 | 0.00 |
| ATOM | 1317 | H    | TYR | A | 122 | 38.266 | 34.810 | -4.387 | 1.00 | 0.00 |
| ATOM | 1318 | HA   | TYR | A | 122 | 36.659 | 35.795 | -2.262 | 1.00 | 0.00 |
| ATOM | 1319 | 1HB  | TYR | A | 122 | 39.081 | 34.576 | -2.525 | 1.00 | 0.00 |

PEDF\_P1\_final\_docking\_model.txt

|      |      |      |     |   |     |        |        |        |      |      |
|------|------|------|-----|---|-----|--------|--------|--------|------|------|
| ATOM | 1320 | 2HB  | TYR | A | 122 | 39.601 | 36.245 | -2.186 | 1.00 | 0.00 |
| ATOM | 1321 | HD1  | TYR | A | 122 | 38.586 | 37.398 | -0.108 | 1.00 | 0.00 |
| ATOM | 1322 | HD2  | TYR | A | 122 | 38.330 | 33.196 | -0.818 | 1.00 | 0.00 |
| ATOM | 1323 | HE1  | TYR | A | 122 | 38.130 | 37.020 | 2.326  | 1.00 | 0.00 |
| ATOM | 1324 | HE2  | TYR | A | 122 | 37.865 | 32.806 | 1.603  | 1.00 | 0.00 |
| ATOM | 1325 | HH   | TYR | A | 122 | 37.667 | 33.724 | 3.662  | 1.00 | 0.00 |
| ATOM | 1326 | N    | LYS | A | 123 | 38.362 | 38.089 | -3.841 | 1.00 | 0.00 |
| ATOM | 1327 | CA   | LYS | A | 123 | 38.501 | 39.522 | -4.037 | 1.00 | 0.00 |
| ATOM | 1328 | C    | LYS | A | 123 | 37.097 | 40.068 | -4.245 | 1.00 | 0.00 |
| ATOM | 1329 | O    | LYS | A | 123 | 36.699 | 41.060 | -3.636 | 1.00 | 0.00 |
| ATOM | 1330 | CB   | LYS | A | 123 | 39.406 | 39.847 | -5.226 | 1.00 | 0.00 |
| ATOM | 1331 | CG   | LYS | A | 123 | 39.627 | 41.336 | -5.460 | 1.00 | 0.00 |
| ATOM | 1332 | CD   | LYS | A | 123 | 40.592 | 41.578 | -6.611 | 1.00 | 0.00 |
| ATOM | 1333 | CE   | LYS | A | 123 | 40.780 | 43.065 | -6.873 | 1.00 | 0.00 |
| ATOM | 1334 | NZ   | LYS | A | 123 | 41.710 | 43.317 | -8.007 | 1.00 | 0.00 |
| ATOM | 1335 | H    | LYS | A | 123 | 38.835 | 37.458 | -4.472 | 1.00 | 0.00 |
| ATOM | 1336 | HA   | LYS | A | 123 | 38.939 | 39.975 | -3.147 | 1.00 | 0.00 |
| ATOM | 1337 | 1HB  | LYS | A | 123 | 40.365 | 39.364 | -5.039 | 1.00 | 0.00 |
| ATOM | 1338 | 2HB  | LYS | A | 123 | 38.944 | 39.407 | -6.110 | 1.00 | 0.00 |
| ATOM | 1339 | 1HG  | LYS | A | 123 | 38.665 | 41.797 | -5.689 | 1.00 | 0.00 |
| ATOM | 1340 | 2HG  | LYS | A | 123 | 40.031 | 41.774 | -4.548 | 1.00 | 0.00 |
| ATOM | 1341 | 1HD  | LYS | A | 123 | 41.553 | 41.129 | -6.358 | 1.00 | 0.00 |
| ATOM | 1342 | 2HD  | LYS | A | 123 | 40.193 | 41.100 | -7.505 | 1.00 | 0.00 |
| ATOM | 1343 | 1HE  | LYS | A | 123 | 39.807 | 43.498 | -7.098 | 1.00 | 0.00 |
| ATOM | 1344 | 2HE  | LYS | A | 123 | 41.180 | 43.523 | -5.968 | 1.00 | 0.00 |
| ATOM | 1345 | 1HZ  | LYS | A | 123 | 41.807 | 44.313 | -8.147 | 1.00 | 0.00 |
| ATOM | 1346 | 2HZ  | LYS | A | 123 | 42.614 | 42.917 | -7.798 | 1.00 | 0.00 |
| ATOM | 1347 | 3HZ  | LYS | A | 123 | 41.340 | 42.894 | -8.846 | 1.00 | 0.00 |
| ATOM | 1348 | N    | GLU | A | 124 | 36.346 | 39.387 | -5.100 | 1.00 | 0.00 |
| ATOM | 1349 | CA   | GLU | A | 124 | 34.976 | 39.760 | -5.415 | 1.00 | 0.00 |
| ATOM | 1350 | C    | GLU | A | 124 | 34.099 | 39.745 | -4.171 | 1.00 | 0.00 |
| ATOM | 1351 | O    | GLU | A | 124 | 33.523 | 40.764 | -3.800 | 1.00 | 0.00 |
| ATOM | 1352 | CB   | GLU | A | 124 | 34.398 | 38.822 | -6.478 | 1.00 | 0.00 |
| ATOM | 1353 | CG   | GLU | A | 124 | 34.881 | 39.103 | -7.893 | 1.00 | 0.00 |
| ATOM | 1354 | CD   | GLU | A | 124 | 34.458 | 40.471 | -8.353 | 1.00 | 0.00 |
| ATOM | 1355 | OE1  | GLU | A | 124 | 33.290 | 40.767 | -8.279 | 1.00 | 0.00 |
| ATOM | 1356 | OE2  | GLU | A | 124 | 35.316 | 41.259 | -8.674 | 1.00 | 0.00 |
| ATOM | 1357 | H    | GLU | A | 124 | 36.750 | 38.576 | -5.547 | 1.00 | 0.00 |
| ATOM | 1358 | HA   | GLU | A | 124 | 34.950 | 40.780 | -5.799 | 1.00 | 0.00 |
| ATOM | 1359 | 1HB  | GLU | A | 124 | 34.679 | 37.808 | -6.194 | 1.00 | 0.00 |
| ATOM | 1360 | 2HB  | GLU | A | 124 | 33.314 | 38.925 | -6.437 | 1.00 | 0.00 |
| ATOM | 1361 | 1HG  | GLU | A | 124 | 35.959 | 38.998 | -8.013 | 1.00 | 0.00 |
| ATOM | 1362 | 2HG  | GLU | A | 124 | 34.374 | 38.347 | -8.492 | 1.00 | 0.00 |
| ATOM | 1363 | N    | LEU | A | 125 | 34.004 | 38.581 | -3.532 | 1.00 | 0.00 |
| ATOM | 1364 | CA   | LEU | A | 125 | 33.202 | 38.411 | -2.319 | 1.00 | 0.00 |
| ATOM | 1365 | C    | LEU | A | 125 | 33.407 | 39.589 | -1.371 | 1.00 | 0.00 |
| ATOM | 1366 | O    | LEU | A | 125 | 32.442 | 40.179 | -0.885 | 1.00 | 0.00 |
| ATOM | 1367 | CB   | LEU | A | 125 | 33.559 | 37.093 | -1.621 | 1.00 | 0.00 |
| ATOM | 1368 | CG   | LEU | A | 125 | 32.751 | 36.785 | -0.354 | 1.00 | 0.00 |
| ATOM | 1369 | CD1  | LEU | A | 125 | 31.275 | 36.641 | -0.698 | 1.00 | 0.00 |
| ATOM | 1370 | CD2  | LEU | A | 125 | 33.282 | 35.514 | 0.292  | 1.00 | 0.00 |
| ATOM | 1371 | H    | LEU | A | 125 | 34.507 | 37.788 | -3.904 | 1.00 | 0.00 |
| ATOM | 1372 | HA   | LEU | A | 125 | 32.144 | 38.395 | -2.580 | 1.00 | 0.00 |
| ATOM | 1373 | 1HB  | LEU | A | 125 | 33.291 | 36.395 | -2.413 | 1.00 | 0.00 |
| ATOM | 1374 | 2HB  | LEU | A | 125 | 34.627 | 37.019 | -1.418 | 1.00 | 0.00 |
| ATOM | 1375 | HG   | LEU | A | 125 | 32.917 | 37.607 | 0.343  | 1.00 | 0.00 |
| ATOM | 1376 | 1HD1 | LEU | A | 125 | 30.709 | 36.423 | 0.208  | 1.00 | 0.00 |
| ATOM | 1377 | 2HD1 | LEU | A | 125 | 30.911 | 37.570 | -1.137 | 1.00 | 0.00 |
| ATOM | 1378 | 3HD1 | LEU | A | 125 | 31.146 | 35.827 | -1.410 | 1.00 | 0.00 |
| ATOM | 1379 | 1HD2 | LEU | A | 125 | 32.707 | 35.297 | 1.193  | 1.00 | 0.00 |
| ATOM | 1380 | 2HD2 | LEU | A | 125 | 33.187 | 34.683 | -0.408 | 1.00 | 0.00 |
| ATOM | 1381 | 3HD2 | LEU | A | 125 | 34.331 | 35.649 | 0.555  | 1.00 | 0.00 |
| ATOM | 1382 | N    | LEU | A | 126 | 34.668 | 39.919 | -1.105 | 1.00 | 0.00 |

PEDF\_P1\_final\_docking\_model.txt

|      |      |      |     |   |     |        |        |        |      |      |
|------|------|------|-----|---|-----|--------|--------|--------|------|------|
| ATOM | 1383 | CA   | LEU | A | 126 | 34.991 | 41.028 | -0.215 | 1.00 | 0.00 |
| ATOM | 1384 | C    | LEU | A | 126 | 34.435 | 42.341 | -0.744 | 1.00 | 0.00 |
| ATOM | 1385 | O    | LEU | A | 126 | 33.816 | 43.107 | 0.000  | 1.00 | 0.00 |
| ATOM | 1386 | CB   | LEU | A | 126 | 36.510 | 41.131 | -0.026 | 1.00 | 0.00 |
| ATOM | 1387 | CG   | LEU | A | 126 | 37.144 | 39.998 | 0.791  | 1.00 | 0.00 |
| ATOM | 1388 | CD1  | LEU | A | 126 | 38.662 | 40.109 | 0.747  | 1.00 | 0.00 |
| ATOM | 1389 | CD2  | LEU | A | 126 | 36.640 | 40.061 | 2.225  | 1.00 | 0.00 |
| ATOM | 1390 | H    | LEU | A | 126 | 35.419 | 39.392 | -1.527 | 1.00 | 0.00 |
| ATOM | 1391 | HA   | LEU | A | 126 | 34.524 | 40.865 | 0.756  | 1.00 | 0.00 |
| ATOM | 1392 | 1HB  | LEU | A | 126 | 36.823 | 41.062 | -1.066 | 1.00 | 0.00 |
| ATOM | 1393 | 2HB  | LEU | A | 126 | 36.801 | 42.101 | 0.378  | 1.00 | 0.00 |
| ATOM | 1394 | HG   | LEU | A | 126 | 36.803 | 39.057 | 0.359  | 1.00 | 0.00 |
| ATOM | 1395 | 1HD1 | LEU | A | 126 | 39.104 | 39.301 | 1.329  | 1.00 | 0.00 |
| ATOM | 1396 | 2HD1 | LEU | A | 126 | 39.002 | 40.039 | -0.286 | 1.00 | 0.00 |
| ATOM | 1397 | 3HD1 | LEU | A | 126 | 38.969 | 41.067 | 1.166  | 1.00 | 0.00 |
| ATOM | 1398 | 1HD2 | LEU | A | 126 | 37.091 | 39.255 | 2.804  | 1.00 | 0.00 |
| ATOM | 1399 | 2HD2 | LEU | A | 126 | 36.912 | 41.021 | 2.665  | 1.00 | 0.00 |
| ATOM | 1400 | 3HD2 | LEU | A | 126 | 35.556 | 39.952 | 2.236  | 1.00 | 0.00 |
| ATOM | 1401 | N    | ASP | A | 127 | 34.653 | 42.602 | -2.028 | 1.00 | 0.00 |
| ATOM | 1402 | CA   | ASP | A | 127 | 34.144 | 43.827 | -2.638 | 1.00 | 0.00 |
| ATOM | 1403 | C    | ASP | A | 127 | 32.640 | 43.956 | -2.406 | 1.00 | 0.00 |
| ATOM | 1404 | O    | ASP | A | 127 | 32.130 | 45.049 | -2.142 | 1.00 | 0.00 |
| ATOM | 1405 | CB   | ASP | A | 127 | 34.454 | 43.854 | -4.137 | 1.00 | 0.00 |
| ATOM | 1406 | CG   | ASP | A | 127 | 35.919 | 44.097 | -4.472 | 1.00 | 0.00 |
| ATOM | 1407 | OD1  | ASP | A | 127 | 36.657 | 44.464 | -3.588 | 1.00 | 0.00 |
| ATOM | 1408 | OD2  | ASP | A | 127 | 36.321 | 43.767 | -5.562 | 1.00 | 0.00 |
| ATOM | 1409 | H    | ASP | A | 127 | 35.176 | 41.950 | -2.595 | 1.00 | 0.00 |
| ATOM | 1410 | HA   | ASP | A | 127 | 34.613 | 44.694 | -2.172 | 1.00 | 0.00 |
| ATOM | 1411 | 1HB  | ASP | A | 127 | 34.102 | 42.970 | -4.669 | 1.00 | 0.00 |
| ATOM | 1412 | 2HB  | ASP | A | 127 | 33.864 | 44.720 | -4.439 | 1.00 | 0.00 |
| ATOM | 1413 | N    | THR | A | 128 | 31.939 | 42.828 | -2.490 | 1.00 | 0.00 |
| ATOM | 1414 | CA   | THR | A | 128 | 30.491 | 42.790 | -2.308 | 1.00 | 0.00 |
| ATOM | 1415 | C    | THR | A | 128 | 29.980 | 43.059 | -0.892 | 1.00 | 0.00 |
| ATOM | 1416 | O    | THR | A | 128 | 29.123 | 43.922 | -0.707 | 1.00 | 0.00 |
| ATOM | 1417 | CB   | THR | A | 128 | 29.939 | 41.424 | -2.757 | 1.00 | 0.00 |
| ATOM | 1418 | OG1  | THR | A | 128 | 30.204 | 41.235 | -4.153 | 1.00 | 0.00 |
| ATOM | 1419 | CG2  | THR | A | 128 | 28.439 | 41.349 | -2.515 | 1.00 | 0.00 |
| ATOM | 1420 | H    | THR | A | 128 | 32.433 | 41.969 | -2.687 | 1.00 | 0.00 |
| ATOM | 1421 | HA   | THR | A | 128 | 30.024 | 43.581 | -2.895 | 1.00 | 0.00 |
| ATOM | 1422 | HB   | THR | A | 128 | 30.437 | 40.637 | -2.192 | 1.00 | 0.00 |
| ATOM | 1423 | HG1  | THR | A | 128 | 31.114 | 40.951 | -4.270 | 1.00 | 0.00 |
| ATOM | 1424 | 1HG2 | THR | A | 128 | 28.068 | 40.377 | -2.838 | 1.00 | 0.00 |
| ATOM | 1425 | 2HG2 | THR | A | 128 | 28.236 | 41.482 | -1.452 | 1.00 | 0.00 |
| ATOM | 1426 | 3HG2 | THR | A | 128 | 27.941 | 42.135 | -3.081 | 1.00 | 0.00 |
| ATOM | 1427 | N    | VAL | A | 129 | 30.489 | 42.328 | 0.102  | 1.00 | 0.00 |
| ATOM | 1428 | CA   | VAL | A | 129 | 30.001 | 42.496 | 1.473  | 1.00 | 0.00 |
| ATOM | 1429 | C    | VAL | A | 129 | 30.544 | 43.689 | 2.240  | 1.00 | 0.00 |
| ATOM | 1430 | O    | VAL | A | 129 | 29.995 | 44.054 | 3.280  | 1.00 | 0.00 |
| ATOM | 1431 | CB   | VAL | A | 129 | 30.202 | 41.200 | 2.257  | 1.00 | 0.00 |
| ATOM | 1432 | CG1  | VAL | A | 129 | 29.451 | 40.053 | 1.577  | 1.00 | 0.00 |
| ATOM | 1433 | CG2  | VAL | A | 129 | 31.687 | 40.885 | 2.444  | 1.00 | 0.00 |
| ATOM | 1434 | H    | VAL | A | 129 | 31.216 | 41.652 | -0.082 | 1.00 | 0.00 |
| ATOM | 1435 | HA   | VAL | A | 129 | 28.928 | 42.693 | 1.491  | 1.00 | 0.00 |
| ATOM | 1436 | HB   | VAL | A | 129 | 29.784 | 41.322 | 3.256  | 1.00 | 0.00 |
| ATOM | 1437 | 1HG1 | VAL | A | 129 | 29.600 | 39.134 | 2.144  | 1.00 | 0.00 |
| ATOM | 1438 | 2HG1 | VAL | A | 129 | 28.387 | 40.286 | 1.539  | 1.00 | 0.00 |
| ATOM | 1439 | 3HG1 | VAL | A | 129 | 29.831 | 39.920 | 0.564  | 1.00 | 0.00 |
| ATOM | 1440 | 1HG2 | VAL | A | 129 | 31.795 | 39.958 | 3.006  | 1.00 | 0.00 |
| ATOM | 1441 | 2HG2 | VAL | A | 129 | 32.161 | 40.776 | 1.468  | 1.00 | 0.00 |
| ATOM | 1442 | 3HG2 | VAL | A | 129 | 32.165 | 41.698 | 2.991  | 1.00 | 0.00 |
| ATOM | 1443 | N    | THR | A | 130 | 31.607 | 44.309 | 1.748  | 1.00 | 0.00 |
| ATOM | 1444 | CA   | THR | A | 130 | 32.140 | 45.457 | 2.466  | 1.00 | 0.00 |
| ATOM | 1445 | C    | THR | A | 130 | 31.673 | 46.780 | 1.861  | 1.00 | 0.00 |

PEDF\_P1\_final\_docking\_model.txt

|      |      |      |     |   |     |        |        |        |      |      |
|------|------|------|-----|---|-----|--------|--------|--------|------|------|
| ATOM | 1446 | O    | THR | A | 130 | 31.971 | 47.848 | 2.401  | 1.00 | 0.00 |
| ATOM | 1447 | CB   | THR | A | 130 | 33.655 | 45.343 | 2.678  | 1.00 | 0.00 |
| ATOM | 1448 | OG1  | THR | A | 130 | 34.363 | 45.314 | 1.441  | 1.00 | 0.00 |
| ATOM | 1449 | CG2  | THR | A | 130 | 34.004 | 44.120 | 3.529  | 1.00 | 0.00 |
| ATOM | 1450 | H    | THR | A | 130 | 32.056 | 44.011 | 0.894  | 1.00 | 0.00 |
| ATOM | 1451 | HA   | THR | A | 130 | 31.772 | 45.453 | 3.492  | 1.00 | 0.00 |
| ATOM | 1452 | HB   | THR | A | 130 | 34.011 | 46.241 | 3.182  | 1.00 | 0.00 |
| ATOM | 1453 | HG1  | THR | A | 130 | 33.738 | 45.373 | 0.714  | 1.00 | 0.00 |
| ATOM | 1454 | 1HG2 | THR | A | 130 | 35.084 | 44.067 | 3.662  | 1.00 | 0.00 |
| ATOM | 1455 | 2HG2 | THR | A | 130 | 33.521 | 44.205 | 4.502  | 1.00 | 0.00 |
| ATOM | 1456 | 3HG2 | THR | A | 130 | 33.655 | 43.218 | 3.028  | 1.00 | 0.00 |
| ATOM | 1457 | N    | ALA | A | 131 | 30.930 | 46.706 | 0.754  | 1.00 | 0.00 |
| ATOM | 1458 | CA   | ALA | A | 131 | 30.408 | 47.898 | 0.079  | 1.00 | 0.00 |
| ATOM | 1459 | C    | ALA | A | 131 | 29.688 | 48.802 | 1.075  | 1.00 | 0.00 |
| ATOM | 1460 | O    | ALA | A | 131 | 29.088 | 48.325 | 2.035  | 1.00 | 0.00 |
| ATOM | 1461 | CB   | ALA | A | 131 | 29.422 | 47.454 | -1.010 | 1.00 | 0.00 |
| ATOM | 1462 | H    | ALA | A | 131 | 30.723 | 45.794 | 0.372  | 1.00 | 0.00 |
| ATOM | 1463 | HA   | ALA | A | 131 | 31.245 | 48.459 | -0.337 | 1.00 | 0.00 |
| ATOM | 1464 | 1HB  | ALA | A | 131 | 29.026 | 48.332 | -1.521 | 1.00 | 0.00 |
| ATOM | 1465 | 2HB  | ALA | A | 131 | 29.937 | 46.817 | -1.730 | 1.00 | 0.00 |
| ATOM | 1466 | 3HB  | ALA | A | 131 | 28.603 | 46.899 | -0.555 | 1.00 | 0.00 |
| ATOM | 1467 | N    | PRO | A | 132 | 29.721 | 50.123 | 0.847  | 1.00 | 0.00 |
| ATOM | 1468 | CA   | PRO | A | 132 | 29.084 | 51.118 | 1.721  | 1.00 | 0.00 |
| ATOM | 1469 | C    | PRO | A | 132 | 27.620 | 50.847 | 2.072  | 1.00 | 0.00 |
| ATOM | 1470 | O    | PRO | A | 132 | 27.206 | 51.073 | 3.211  | 1.00 | 0.00 |
| ATOM | 1471 | CB   | PRO | A | 132 | 29.280 | 52.429 | 0.955  | 1.00 | 0.00 |
| ATOM | 1472 | CG   | PRO | A | 132 | 30.560 | 52.216 | 0.152  | 1.00 | 0.00 |
| ATOM | 1473 | CD   | PRO | A | 132 | 30.449 | 50.752 | -0.252 | 1.00 | 0.00 |
| ATOM | 1474 | HA   | PRO | A | 132 | 29.555 | 51.176 | 2.713  | 1.00 | 0.00 |
| ATOM | 1475 | 1HB  | PRO | A | 132 | 28.427 | 52.641 | 0.294  | 1.00 | 0.00 |
| ATOM | 1476 | 2HB  | PRO | A | 132 | 29.378 | 53.285 | 1.639  | 1.00 | 0.00 |
| ATOM | 1477 | 1HG  | PRO | A | 132 | 30.603 | 52.892 | -0.715 | 1.00 | 0.00 |
| ATOM | 1478 | 2HG  | PRO | A | 132 | 31.451 | 52.420 | 0.763  | 1.00 | 0.00 |
| ATOM | 1479 | 1HD  | PRO | A | 132 | 29.904 | 50.622 | -1.199 | 1.00 | 0.00 |
| ATOM | 1480 | 2HD  | PRO | A | 132 | 31.434 | 50.280 | -0.381 | 1.00 | 0.00 |
| ATOM | 1481 | N    | GLN | A | 133 | 26.840 | 50.381 | 1.094  | 1.00 | 0.00 |
| ATOM | 1482 | CA   | GLN | A | 133 | 25.421 | 50.096 | 1.314  | 1.00 | 0.00 |
| ATOM | 1483 | C    | GLN | A | 133 | 25.224 | 49.142 | 2.492  | 1.00 | 0.00 |
| ATOM | 1484 | O    | GLN | A | 133 | 24.238 | 49.248 | 3.226  | 1.00 | 0.00 |
| ATOM | 1485 | CB   | GLN | A | 133 | 24.793 | 49.496 | 0.053  | 1.00 | 0.00 |
| ATOM | 1486 | CG   | GLN | A | 133 | 24.612 | 50.486 | -1.084 | 1.00 | 0.00 |
| ATOM | 1487 | CD   | GLN | A | 133 | 24.070 | 49.832 | -2.341 | 1.00 | 0.00 |
| ATOM | 1488 | OE1  | GLN | A | 133 | 23.874 | 48.614 | -2.388 | 1.00 | 0.00 |
| ATOM | 1489 | NE2  | GLN | A | 133 | 23.829 | 50.637 | -3.369 | 1.00 | 0.00 |
| ATOM | 1490 | H    | GLN | A | 133 | 27.238 | 50.221 | 0.180  | 1.00 | 0.00 |
| ATOM | 1491 | HA   | GLN | A | 133 | 24.899 | 51.018 | 1.571  | 1.00 | 0.00 |
| ATOM | 1492 | 1HB  | GLN | A | 133 | 25.444 | 48.682 | -0.266 | 1.00 | 0.00 |
| ATOM | 1493 | 2HB  | GLN | A | 133 | 23.824 | 49.091 | 0.346  | 1.00 | 0.00 |
| ATOM | 1494 | 1HG  | GLN | A | 133 | 24.105 | 51.442 | -0.959 | 1.00 | 0.00 |
| ATOM | 1495 | 2HG  | GLN | A | 133 | 25.681 | 50.659 | -1.219 | 1.00 | 0.00 |
| ATOM | 1496 | 1HE2 | GLN | A | 133 | 23.471 | 50.262 | -4.225 | 1.00 | 0.00 |
| ATOM | 1497 | 2HE2 | GLN | A | 133 | 24.005 | 51.618 | -3.289 | 1.00 | 0.00 |
| ATOM | 1498 | N    | LYS | A | 134 | 26.151 | 48.202 | 2.667  | 1.00 | 0.00 |
| ATOM | 1499 | CA   | LYS | A | 134 | 26.079 | 47.277 | 3.799  | 1.00 | 0.00 |
| ATOM | 1500 | C    | LYS | A | 134 | 26.514 | 48.196 | 4.926  | 1.00 | 0.00 |
| ATOM | 1501 | O    | LYS | A | 134 | 26.648 | 49.395 | 4.714  | 1.00 | 0.00 |
| ATOM | 1502 | CB   | LYS | A | 134 | 27.046 | 46.102 | 3.570  | 1.00 | 0.00 |
| ATOM | 1503 | CG   | LYS | A | 134 | 26.949 | 45.402 | 2.195  | 1.00 | 0.00 |
| ATOM | 1504 | CD   | LYS | A | 134 | 25.733 | 44.488 | 1.964  | 1.00 | 0.00 |
| ATOM | 1505 | CE   | LYS | A | 134 | 25.630 | 43.909 | 0.534  | 1.00 | 0.00 |
| ATOM | 1506 | NZ   | LYS | A | 134 | 24.413 | 43.096 | 0.366  | 1.00 | 0.00 |
| ATOM | 1507 | H    | LYS | A | 134 | 26.917 | 48.121 | 2.013  | 1.00 | 0.00 |
| ATOM | 1508 | HA   | LYS | A | 134 | 25.059 | 46.906 | 3.908  | 1.00 | 0.00 |



PEDF\_P1\_final\_docking\_model.txt

|      |      |      |     |   |     |        |        |        |      |      |
|------|------|------|-----|---|-----|--------|--------|--------|------|------|
| ATOM | 1509 | 1HB  | LYS | A | 134 | 28.057 | 46.492 | 3.691  | 1.00 | 0.00 |
| ATOM | 1510 | 2HB  | LYS | A | 134 | 26.846 | 45.366 | 4.349  | 1.00 | 0.00 |
| ATOM | 1511 | 1HG  | LYS | A | 134 | 26.917 | 46.167 | 1.418  | 1.00 | 0.00 |
| ATOM | 1512 | 2HG  | LYS | A | 134 | 27.835 | 44.783 | 2.058  | 1.00 | 0.00 |
| ATOM | 1513 | 1HD  | LYS | A | 134 | 25.790 | 43.651 | 2.662  | 1.00 | 0.00 |
| ATOM | 1514 | 2HD  | LYS | A | 134 | 24.826 | 45.060 | 2.159  | 1.00 | 0.00 |
| ATOM | 1515 | 1HE  | LYS | A | 134 | 25.616 | 44.739 | -0.171 | 1.00 | 0.00 |
| ATOM | 1516 | 2HE  | LYS | A | 134 | 26.510 | 43.293 | 0.351  | 1.00 | 0.00 |
| ATOM | 1517 | 1HZ  | LYS | A | 134 | 24.378 | 42.734 | -0.576 | 1.00 | 0.00 |
| ATOM | 1518 | 2HZ  | LYS | A | 134 | 24.428 | 42.327 | 1.022  | 1.00 | 0.00 |
| ATOM | 1519 | 3HZ  | LYS | A | 134 | 23.599 | 43.669 | 0.537  | 1.00 | 0.00 |
| ATOM | 1520 | N    | ASN | A | 135 | 26.729 | 47.681 | 6.121  | 1.00 | 0.00 |
| ATOM | 1521 | CA   | ASN | A | 135 | 27.203 | 48.573 | 7.173  | 1.00 | 0.00 |
| ATOM | 1522 | C    | ASN | A | 135 | 28.317 | 47.877 | 7.917  | 1.00 | 0.00 |
| ATOM | 1523 | O    | ASN | A | 135 | 28.695 | 48.254 | 9.030  | 1.00 | 0.00 |
| ATOM | 1524 | CB   | ASN | A | 135 | 26.096 | 48.988 | 8.125  | 1.00 | 0.00 |
| ATOM | 1525 | CG   | ASN | A | 135 | 24.972 | 49.731 | 7.459  | 1.00 | 0.00 |
| ATOM | 1526 | OD1  | ASN | A | 135 | 25.106 | 50.905 | 7.095  | 1.00 | 0.00 |
| ATOM | 1527 | ND2  | ASN | A | 135 | 23.839 | 49.081 | 7.373  | 1.00 | 0.00 |
| ATOM | 1528 | H    | ASN | A | 135 | 26.580 | 46.705 | 6.334  | 1.00 | 0.00 |
| ATOM | 1529 | HA   | ASN | A | 135 | 27.602 | 49.487 | 6.731  | 1.00 | 0.00 |
| ATOM | 1530 | 1HB  | ASN | A | 135 | 25.681 | 48.278 | 8.842  | 1.00 | 0.00 |
| ATOM | 1531 | 2HB  | ASN | A | 135 | 26.729 | 49.705 | 8.649  | 1.00 | 0.00 |
| ATOM | 1532 | 1HD2 | ASN | A | 135 | 23.047 | 49.514 | 6.941  | 1.00 | 0.00 |
| ATOM | 1533 | 2HD2 | ASN | A | 135 | 23.766 | 48.154 | 7.737  | 1.00 | 0.00 |
| ATOM | 1534 | N    | LEU | A | 136 | 28.850 | 46.863 | 7.247  | 1.00 | 0.00 |
| ATOM | 1535 | CA   | LEU | A | 136 | 29.909 | 46.025 | 7.765  | 1.00 | 0.00 |
| ATOM | 1536 | C    | LEU | A | 136 | 31.306 | 46.488 | 7.388  | 1.00 | 0.00 |
| ATOM | 1537 | O    | LEU | A | 136 | 31.582 | 46.804 | 6.232  | 1.00 | 0.00 |
| ATOM | 1538 | CB   | LEU | A | 136 | 29.670 | 44.596 | 7.281  | 1.00 | 0.00 |
| ATOM | 1539 | CG   | LEU | A | 136 | 30.642 | 43.574 | 7.866  | 1.00 | 0.00 |
| ATOM | 1540 | CD1  | LEU | A | 136 | 30.406 | 43.324 | 9.356  | 1.00 | 0.00 |
| ATOM | 1541 | CD2  | LEU | A | 136 | 30.652 | 42.285 | 7.049  | 1.00 | 0.00 |
| ATOM | 1542 | H    | LEU | A | 136 | 28.484 | 46.679 | 6.324  | 1.00 | 0.00 |
| ATOM | 1543 | HA   | LEU | A | 136 | 29.895 | 46.051 | 8.854  | 1.00 | 0.00 |
| ATOM | 1544 | 1HB  | LEU | A | 136 | 28.668 | 44.440 | 7.677  | 1.00 | 0.00 |
| ATOM | 1545 | 2HB  | LEU | A | 136 | 29.644 | 44.537 | 6.193  | 1.00 | 0.00 |
| ATOM | 1546 | HG   | LEU | A | 136 | 31.642 | 44.002 | 7.797  | 1.00 | 0.00 |
| ATOM | 1547 | 1HD1 | LEU | A | 136 | 31.124 | 42.590 | 9.720  | 1.00 | 0.00 |
| ATOM | 1548 | 2HD1 | LEU | A | 136 | 30.532 | 44.257 | 9.906  | 1.00 | 0.00 |
| ATOM | 1549 | 3HD1 | LEU | A | 136 | 29.395 | 42.947 | 9.506  | 1.00 | 0.00 |
| ATOM | 1550 | 1HD2 | LEU | A | 136 | 31.355 | 41.579 | 7.492  | 1.00 | 0.00 |
| ATOM | 1551 | 2HD2 | LEU | A | 136 | 29.653 | 41.849 | 7.045  | 1.00 | 0.00 |
| ATOM | 1552 | 3HD2 | LEU | A | 136 | 30.956 | 42.505 | 6.026  | 1.00 | 0.00 |
| ATOM | 1553 | N    | LYS | A | 137 | 32.182 | 46.533 | 8.382  | 1.00 | 0.00 |
| ATOM | 1554 | CA   | LYS | A | 137 | 33.570 | 46.890 | 8.163  | 1.00 | 0.00 |
| ATOM | 1555 | C    | LYS | A | 137 | 34.360 | 45.691 | 8.664  | 1.00 | 0.00 |
| ATOM | 1556 | O    | LYS | A | 137 | 34.281 | 45.330 | 9.839  | 1.00 | 0.00 |
| ATOM | 1557 | CB   | LYS | A | 137 | 33.960 | 48.175 | 8.896  | 1.00 | 0.00 |
| ATOM | 1558 | CG   | LYS | A | 137 | 33.234 | 49.422 | 8.410  | 1.00 | 0.00 |
| ATOM | 1559 | CD   | LYS | A | 137 | 33.650 | 50.650 | 9.206  | 1.00 | 0.00 |
| ATOM | 1560 | CE   | LYS | A | 137 | 32.961 | 51.904 | 8.689  | 1.00 | 0.00 |
| ATOM | 1561 | NZ   | LYS | A | 137 | 31.499 | 51.892 | 8.969  | 1.00 | 0.00 |
| ATOM | 1562 | H    | LYS | A | 137 | 31.873 | 46.312 | 9.318  | 1.00 | 0.00 |
| ATOM | 1563 | HA   | LYS | A | 137 | 33.747 | 47.049 | 7.099  | 1.00 | 0.00 |
| ATOM | 1564 | 1HB  | LYS | A | 137 | 33.744 | 48.017 | 9.953  | 1.00 | 0.00 |
| ATOM | 1565 | 2HB  | LYS | A | 137 | 35.034 | 48.306 | 8.761  | 1.00 | 0.00 |
| ATOM | 1566 | 1HG  | LYS | A | 137 | 33.472 | 49.573 | 7.356  | 1.00 | 0.00 |
| ATOM | 1567 | 2HG  | LYS | A | 137 | 32.162 | 49.263 | 8.521  | 1.00 | 0.00 |
| ATOM | 1568 | 1HD  | LYS | A | 137 | 33.384 | 50.493 | 10.252 | 1.00 | 0.00 |
| ATOM | 1569 | 2HD  | LYS | A | 137 | 34.730 | 50.769 | 9.121  | 1.00 | 0.00 |
| ATOM | 1570 | 1HE  | LYS | A | 137 | 33.416 | 52.768 | 9.173  | 1.00 | 0.00 |
| ATOM | 1571 | 2HE  | LYS | A | 137 | 33.123 | 51.965 | 7.613  | 1.00 | 0.00 |

PEDF\_P1\_final\_docking\_model.txt

|      |      |      |     |   |     |        |        |        |      |      |
|------|------|------|-----|---|-----|--------|--------|--------|------|------|
| ATOM | 1572 | 1HZ  | LYS | A | 137 | 31.081 | 52.739 | 8.611  | 1.00 | 0.00 |
| ATOM | 1573 | 2HZ  | LYS | A | 137 | 31.077 | 51.092 | 8.520  | 1.00 | 0.00 |
| ATOM | 1574 | 3HZ  | LYS | A | 137 | 31.348 | 51.837 | 9.966  | 1.00 | 0.00 |
| ATOM | 1575 | N    | SER | A | 138 | 35.094 | 45.058 | 7.754  | 1.00 | 0.00 |
| ATOM | 1576 | CA   | SER | A | 138 | 35.873 | 43.874 | 8.081  | 1.00 | 0.00 |
| ATOM | 1577 | C    | SER | A | 138 | 37.286 | 44.001 | 7.527  | 1.00 | 0.00 |
| ATOM | 1578 | O    | SER | A | 138 | 37.473 | 44.336 | 6.356  | 1.00 | 0.00 |
| ATOM | 1579 | CB   | SER | A | 138 | 35.195 | 42.631 | 7.538  | 1.00 | 0.00 |
| ATOM | 1580 | OG   | SER | A | 138 | 35.923 | 41.468 | 7.823  | 1.00 | 0.00 |
| ATOM | 1581 | H    | SER | A | 138 | 35.110 | 45.411 | 6.808  | 1.00 | 0.00 |
| ATOM | 1582 | HA   | SER | A | 138 | 35.900 | 43.655 | 9.149  | 1.00 | 0.00 |
| ATOM | 1583 | 1HB  | SER | A | 138 | 34.206 | 42.549 | 7.988  | 1.00 | 0.00 |
| ATOM | 1584 | 2HB  | SER | A | 138 | 35.095 | 42.731 | 6.458  | 1.00 | 0.00 |
| ATOM | 1585 | HG   | SER | A | 138 | 35.462 | 40.706 | 7.464  | 1.00 | 0.00 |
| ATOM | 1586 | N    | ALA | A | 139 | 38.281 | 43.737 | 8.369  | 1.00 | 0.00 |
| ATOM | 1587 | CA   | ALA | A | 139 | 39.671 | 43.816 | 7.941  | 1.00 | 0.00 |
| ATOM | 1588 | C    | ALA | A | 139 | 40.503 | 42.672 | 8.512  | 1.00 | 0.00 |
| ATOM | 1589 | O    | ALA | A | 139 | 40.239 | 42.184 | 9.616  | 1.00 | 0.00 |
| ATOM | 1590 | CB   | ALA | A | 139 | 40.285 | 45.156 | 8.334  | 1.00 | 0.00 |
| ATOM | 1591 | H    | ALA | A | 139 | 38.074 | 43.477 | 9.323  | 1.00 | 0.00 |
| ATOM | 1592 | HA   | ALA | A | 139 | 39.708 | 43.726 | 6.855  | 1.00 | 0.00 |
| ATOM | 1593 | 1HB  | ALA | A | 139 | 41.323 | 45.190 | 8.003  | 1.00 | 0.00 |
| ATOM | 1594 | 2HB  | ALA | A | 139 | 39.727 | 45.965 | 7.862  | 1.00 | 0.00 |
| ATOM | 1595 | 3HB  | ALA | A | 139 | 40.246 | 45.271 | 9.416  | 1.00 | 0.00 |
| ATOM | 1596 | N    | SER | A | 140 | 41.502 | 42.244 | 7.743  | 1.00 | 0.00 |
| ATOM | 1597 | CA   | SER | A | 140 | 42.394 | 41.157 | 8.143  | 1.00 | 0.00 |
| ATOM | 1598 | C    | SER | A | 140 | 43.829 | 41.613 | 7.950  | 1.00 | 0.00 |
| ATOM | 1599 | O    | SER | A | 140 | 44.121 | 42.351 | 7.013  | 1.00 | 0.00 |
| ATOM | 1600 | CB   | SER | A | 140 | 42.113 | 39.900 | 7.342  | 1.00 | 0.00 |
| ATOM | 1601 | OG   | SER | A | 140 | 42.368 | 40.079 | 5.976  | 1.00 | 0.00 |
| ATOM | 1602 | H    | SER | A | 140 | 41.643 | 42.693 | 6.849  | 1.00 | 0.00 |
| ATOM | 1603 | HA   | SER | A | 140 | 42.215 | 40.801 | 9.159  | 1.00 | 0.00 |
| ATOM | 1604 | 1HB  | SER | A | 140 | 42.747 | 39.098 | 7.719  | 1.00 | 0.00 |
| ATOM | 1605 | 2HB  | SER | A | 140 | 41.067 | 39.628 | 7.475  | 1.00 | 0.00 |
| ATOM | 1606 | HG   | SER | A | 140 | 41.626 | 40.535 | 5.570  | 1.00 | 0.00 |
| ATOM | 1607 | N    | ARG | A | 141 | 44.727 | 41.166 | 8.821  | 1.00 | 0.00 |
| ATOM | 1608 | CA   | ARG | A | 141 | 46.131 | 41.551 | 8.718  | 1.00 | 0.00 |
| ATOM | 1609 | C    | ARG | A | 141 | 47.058 | 40.417 | 9.137  | 1.00 | 0.00 |
| ATOM | 1610 | O    | ARG | A | 141 | 46.817 | 39.753 | 10.145 | 1.00 | 0.00 |
| ATOM | 1611 | CB   | ARG | A | 141 | 46.432 | 42.826 | 9.492  | 1.00 | 0.00 |
| ATOM | 1612 | CG   | ARG | A | 141 | 47.795 | 43.438 | 9.213  | 1.00 | 0.00 |
| ATOM | 1613 | CD   | ARG | A | 141 | 47.827 | 44.355 | 8.045  | 1.00 | 0.00 |
| ATOM | 1614 | NE   | ARG | A | 141 | 49.031 | 45.164 | 7.946  | 1.00 | 0.00 |
| ATOM | 1615 | CZ   | ARG | A | 141 | 49.249 | 46.099 | 7.002  | 1.00 | 0.00 |
| ATOM | 1616 | NH1  | ARG | A | 141 | 48.367 | 46.323 | 6.053  | 1.00 | 0.00 |
| ATOM | 1617 | NH2  | ARG | A | 141 | 50.386 | 46.772 | 7.040  | 1.00 | 0.00 |
| ATOM | 1618 | H    | ARG | A | 141 | 44.439 | 40.550 | 9.568  | 1.00 | 0.00 |
| ATOM | 1619 | HA   | ARG | A | 141 | 46.376 | 41.777 | 7.680  | 1.00 | 0.00 |
| ATOM | 1620 | 1HB  | ARG | A | 141 | 45.655 | 43.545 | 9.235  | 1.00 | 0.00 |
| ATOM | 1621 | 2HB  | ARG | A | 141 | 46.360 | 42.578 | 10.552 | 1.00 | 0.00 |
| ATOM | 1622 | 1HG  | ARG | A | 141 | 48.109 | 44.002 | 10.091 | 1.00 | 0.00 |
| ATOM | 1623 | 2HG  | ARG | A | 141 | 48.505 | 42.631 | 9.026  | 1.00 | 0.00 |
| ATOM | 1624 | 1HD  | ARG | A | 141 | 47.753 | 43.767 | 7.131  | 1.00 | 0.00 |
| ATOM | 1625 | 2HD  | ARG | A | 141 | 46.980 | 45.037 | 8.108  | 1.00 | 0.00 |
| ATOM | 1626 | HE   | ARG | A | 141 | 49.857 | 45.163 | 8.530  | 1.00 | 0.00 |
| ATOM | 1627 | 1HH1 | ARG | A | 141 | 47.511 | 45.788 | 6.027  | 1.00 | 0.00 |
| ATOM | 1628 | 2HH1 | ARG | A | 141 | 48.549 | 47.028 | 5.354  | 1.00 | 0.00 |
| ATOM | 1629 | 1HH2 | ARG | A | 141 | 51.062 | 46.575 | 7.766  | 1.00 | 0.00 |
| ATOM | 1630 | 2HH2 | ARG | A | 141 | 50.575 | 47.478 | 6.345  | 1.00 | 0.00 |
| ATOM | 1631 | N    | ILE | A | 142 | 48.110 | 40.193 | 8.352  | 1.00 | 0.00 |
| ATOM | 1632 | CA   | ILE | A | 142 | 49.114 | 39.171 | 8.662  | 1.00 | 0.00 |
| ATOM | 1633 | C    | ILE | A | 142 | 50.306 | 39.924 | 9.256  | 1.00 | 0.00 |
| ATOM | 1634 | O    | ILE | A | 142 | 50.843 | 40.828 | 8.622  | 1.00 | 0.00 |

PEDF\_P1\_final\_docking\_model.txt

|      |      |      |     |   |     |        |        |        |      |      |
|------|------|------|-----|---|-----|--------|--------|--------|------|------|
| ATOM | 1635 | CB   | ILE | A | 142 | 49.550 | 38.361 | 7.428  | 1.00 | 0.00 |
| ATOM | 1636 | CG1  | ILE | A | 142 | 48.332 | 37.735 | 6.742  | 1.00 | 0.00 |
| ATOM | 1637 | CG2  | ILE | A | 142 | 50.552 | 37.287 | 7.823  | 1.00 | 0.00 |
| ATOM | 1638 | CD1  | ILE | A | 142 | 48.641 | 37.111 | 5.400  | 1.00 | 0.00 |
| ATOM | 1639 | H    | ILE | A | 142 | 48.216 | 40.749 | 7.515  | 1.00 | 0.00 |
| ATOM | 1640 | HA   | ILE | A | 142 | 48.739 | 38.480 | 9.416  | 1.00 | 0.00 |
| ATOM | 1641 | HB   | ILE | A | 142 | 50.006 | 39.034 | 6.703  | 1.00 | 0.00 |
| ATOM | 1642 | 1HG1 | ILE | A | 142 | 47.937 | 36.974 | 7.414  | 1.00 | 0.00 |
| ATOM | 1643 | 2HG1 | ILE | A | 142 | 47.592 | 38.525 | 6.614  | 1.00 | 0.00 |
| ATOM | 1644 | 1HG2 | ILE | A | 142 | 50.849 | 36.723 | 6.939  | 1.00 | 0.00 |
| ATOM | 1645 | 2HG2 | ILE | A | 142 | 51.430 | 37.755 | 8.267  | 1.00 | 0.00 |
| ATOM | 1646 | 3HG2 | ILE | A | 142 | 50.096 | 36.612 | 8.547  | 1.00 | 0.00 |
| ATOM | 1647 | 1HD1 | ILE | A | 142 | 47.729 | 36.689 | 4.976  | 1.00 | 0.00 |
| ATOM | 1648 | 2HD1 | ILE | A | 142 | 49.035 | 37.872 | 4.726  | 1.00 | 0.00 |
| ATOM | 1649 | 3HD1 | ILE | A | 142 | 49.379 | 36.321 | 5.527  | 1.00 | 0.00 |
| ATOM | 1650 | N    | VAL | A | 143 | 50.709 | 39.566 | 10.470 | 1.00 | 0.00 |
| ATOM | 1651 | CA   | VAL | A | 143 | 51.823 | 40.245 | 11.122 | 1.00 | 0.00 |
| ATOM | 1652 | C    | VAL | A | 143 | 52.977 | 39.288 | 11.377 | 1.00 | 0.00 |
| ATOM | 1653 | O    | VAL | A | 143 | 52.778 | 38.217 | 11.957 | 1.00 | 0.00 |
| ATOM | 1654 | CB   | VAL | A | 143 | 51.360 | 40.903 | 12.426 | 1.00 | 0.00 |
| ATOM | 1655 | CG1  | VAL | A | 143 | 52.506 | 41.646 | 13.115 | 1.00 | 0.00 |
| ATOM | 1656 | CG2  | VAL | A | 143 | 50.150 | 41.809 | 12.191 | 1.00 | 0.00 |
| ATOM | 1657 | H    | VAL | A | 143 | 50.241 | 38.813 | 10.954 | 1.00 | 0.00 |
| ATOM | 1658 | HA   | VAL | A | 143 | 52.241 | 41.024 | 10.483 | 1.00 | 0.00 |
| ATOM | 1659 | HB   | VAL | A | 143 | 51.036 | 40.126 | 13.119 | 1.00 | 0.00 |
| ATOM | 1660 | 1HG1 | VAL | A | 143 | 52.143 | 42.101 | 14.037 | 1.00 | 0.00 |
| ATOM | 1661 | 2HG1 | VAL | A | 143 | 53.307 | 40.944 | 13.348 | 1.00 | 0.00 |
| ATOM | 1662 | 3HG1 | VAL | A | 143 | 52.885 | 42.424 | 12.453 | 1.00 | 0.00 |
| ATOM | 1663 | 1HG2 | VAL | A | 143 | 49.844 | 42.261 | 13.134 | 1.00 | 0.00 |
| ATOM | 1664 | 2HG2 | VAL | A | 143 | 50.416 | 42.593 | 11.482 | 1.00 | 0.00 |
| ATOM | 1665 | 3HG2 | VAL | A | 143 | 49.326 | 41.219 | 11.788 | 1.00 | 0.00 |
| ATOM | 1666 | N    | PHE | A | 144 | 54.178 | 39.686 | 10.949 | 1.00 | 0.00 |
| ATOM | 1667 | CA   | PHE | A | 144 | 55.380 | 38.865 | 11.109 | 1.00 | 0.00 |
| ATOM | 1668 | C    | PHE | A | 144 | 56.373 | 39.354 | 12.153 | 1.00 | 0.00 |
| ATOM | 1669 | O    | PHE | A | 144 | 56.416 | 40.535 | 12.506 | 1.00 | 0.00 |
| ATOM | 1670 | CB   | PHE | A | 144 | 56.095 | 38.747 | 9.762  | 1.00 | 0.00 |
| ATOM | 1671 | CG   | PHE | A | 144 | 55.313 | 37.994 | 8.724  | 1.00 | 0.00 |
| ATOM | 1672 | CD1  | PHE | A | 144 | 54.519 | 38.669 | 7.809  | 1.00 | 0.00 |
| ATOM | 1673 | CD2  | PHE | A | 144 | 55.368 | 36.610 | 8.661  | 1.00 | 0.00 |
| ATOM | 1674 | CE1  | PHE | A | 144 | 53.798 | 37.977 | 6.854  | 1.00 | 0.00 |
| ATOM | 1675 | CE2  | PHE | A | 144 | 54.650 | 35.916 | 7.707  | 1.00 | 0.00 |
| ATOM | 1676 | CZ   | PHE | A | 144 | 53.864 | 36.601 | 6.802  | 1.00 | 0.00 |
| ATOM | 1677 | H    | PHE | A | 144 | 54.254 | 40.587 | 10.499 | 1.00 | 0.00 |
| ATOM | 1678 | HA   | PHE | A | 144 | 55.104 | 37.869 | 11.457 | 1.00 | 0.00 |
| ATOM | 1679 | 1HB  | PHE | A | 144 | 56.287 | 39.737 | 9.350  | 1.00 | 0.00 |
| ATOM | 1680 | 2HB  | PHE | A | 144 | 57.039 | 38.217 | 9.885  | 1.00 | 0.00 |
| ATOM | 1681 | HD1  | PHE | A | 144 | 54.468 | 39.757 | 7.849  | 1.00 | 0.00 |
| ATOM | 1682 | HD2  | PHE | A | 144 | 55.989 | 36.069 | 9.376  | 1.00 | 0.00 |
| ATOM | 1683 | HE1  | PHE | A | 144 | 53.178 | 38.520 | 6.141  | 1.00 | 0.00 |
| ATOM | 1684 | HE2  | PHE | A | 144 | 54.702 | 34.828 | 7.668  | 1.00 | 0.00 |
| ATOM | 1685 | HZ   | PHE | A | 144 | 53.295 | 36.055 | 6.051  | 1.00 | 0.00 |
| ATOM | 1686 | N    | GLU | A | 145 | 57.184 | 38.414 | 12.628 | 1.00 | 0.00 |
| ATOM | 1687 | CA   | GLU | A | 145 | 58.209 | 38.679 | 13.626 | 1.00 | 0.00 |
| ATOM | 1688 | C    | GLU | A | 145 | 59.235 | 39.710 | 13.141 | 1.00 | 0.00 |
| ATOM | 1689 | O    | GLU | A | 145 | 59.386 | 39.936 | 11.940 | 1.00 | 0.00 |
| ATOM | 1690 | CB   | GLU | A | 145 | 58.915 | 37.377 | 14.011 | 1.00 | 0.00 |
| ATOM | 1691 | CG   | GLU | A | 145 | 59.766 | 36.772 | 12.903 | 1.00 | 0.00 |
| ATOM | 1692 | CD   | GLU | A | 145 | 60.369 | 35.463 | 13.330 | 1.00 | 0.00 |
| ATOM | 1693 | OE1  | GLU | A | 145 | 60.108 | 35.042 | 14.431 | 1.00 | 0.00 |
| ATOM | 1694 | OE2  | GLU | A | 145 | 60.998 | 34.828 | 12.517 | 1.00 | 0.00 |
| ATOM | 1695 | H    | GLU | A | 145 | 57.075 | 37.475 | 12.272 | 1.00 | 0.00 |
| ATOM | 1696 | HA   | GLU | A | 145 | 57.754 | 39.110 | 14.518 | 1.00 | 0.00 |
| ATOM | 1697 | 1HB  | GLU | A | 145 | 59.546 | 37.599 | 14.872 | 1.00 | 0.00 |

PEDF\_P1\_final\_docking\_model.txt

|      |      |      |     |   |     |        |        |        |      |      |
|------|------|------|-----|---|-----|--------|--------|--------|------|------|
| ATOM | 1698 | 2HB  | GLU | A | 145 | 58.140 | 36.667 | 14.301 | 1.00 | 0.00 |
| ATOM | 1699 | 1HG  | GLU | A | 145 | 59.225 | 36.634 | 11.967 | 1.00 | 0.00 |
| ATOM | 1700 | 2HG  | GLU | A | 145 | 60.558 | 37.506 | 12.758 | 1.00 | 0.00 |
| ATOM | 1701 | N    | LYS | A | 146 | 59.935 | 40.327 | 14.089 | 1.00 | 0.00 |
| ATOM | 1702 | CA   | LYS | A | 146 | 60.939 | 41.340 | 13.790 | 1.00 | 0.00 |
| ATOM | 1703 | C    | LYS | A | 146 | 61.949 | 40.890 | 12.746 | 1.00 | 0.00 |
| ATOM | 1704 | O    | LYS | A | 146 | 62.218 | 39.699 | 12.592 | 1.00 | 0.00 |
| ATOM | 1705 | CB   | LYS | A | 146 | 61.671 | 41.744 | 15.071 | 1.00 | 0.00 |
| ATOM | 1706 | CG   | LYS | A | 146 | 62.575 | 40.663 | 15.646 | 1.00 | 0.00 |
| ATOM | 1707 | CD   | LYS | A | 146 | 63.257 | 41.133 | 16.923 | 1.00 | 0.00 |
| ATOM | 1708 | CE   | LYS | A | 146 | 64.190 | 40.067 | 17.478 | 1.00 | 0.00 |
| ATOM | 1709 | NZ   | LYS | A | 146 | 64.874 | 40.518 | 18.720 | 1.00 | 0.00 |
| ATOM | 1710 | H    | LYS | A | 146 | 59.758 | 40.079 | 15.052 | 1.00 | 0.00 |
| ATOM | 1711 | HA   | LYS | A | 146 | 60.458 | 42.222 | 13.365 | 1.00 | 0.00 |
| ATOM | 1712 | 1HB  | LYS | A | 146 | 62.266 | 42.627 | 14.834 | 1.00 | 0.00 |
| ATOM | 1713 | 2HB  | LYS | A | 146 | 60.909 | 42.008 | 15.805 | 1.00 | 0.00 |
| ATOM | 1714 | 1HG  | LYS | A | 146 | 61.969 | 39.782 | 15.861 | 1.00 | 0.00 |
| ATOM | 1715 | 2HG  | LYS | A | 146 | 63.331 | 40.411 | 14.903 | 1.00 | 0.00 |
| ATOM | 1716 | 1HD  | LYS | A | 146 | 63.827 | 42.036 | 16.700 | 1.00 | 0.00 |
| ATOM | 1717 | 2HD  | LYS | A | 146 | 62.489 | 41.363 | 17.662 | 1.00 | 0.00 |
| ATOM | 1718 | 1HE  | LYS | A | 146 | 63.602 | 39.175 | 17.691 | 1.00 | 0.00 |
| ATOM | 1719 | 2HE  | LYS | A | 146 | 64.935 | 39.836 | 16.717 | 1.00 | 0.00 |
| ATOM | 1720 | 1HZ  | LYS | A | 146 | 65.482 | 39.784 | 19.055 | 1.00 | 0.00 |
| ATOM | 1721 | 2HZ  | LYS | A | 146 | 65.420 | 41.345 | 18.523 | 1.00 | 0.00 |
| ATOM | 1722 | 3HZ  | LYS | A | 146 | 64.183 | 40.732 | 19.426 | 1.00 | 0.00 |
| ATOM | 1723 | N    | LYS | A | 147 | 62.482 | 41.874 | 12.026 | 1.00 | 0.00 |
| ATOM | 1724 | CA   | LYS | A | 147 | 63.506 | 41.697 | 10.996 | 1.00 | 0.00 |
| ATOM | 1725 | C    | LYS | A | 147 | 63.318 | 40.652 | 9.894  | 1.00 | 0.00 |
| ATOM | 1726 | O    | LYS | A | 147 | 64.233 | 40.434 | 9.104  | 1.00 | 0.00 |
| ATOM | 1727 | CB   | LYS | A | 147 | 64.831 | 41.402 | 11.700 | 1.00 | 0.00 |
| ATOM | 1728 | CG   | LYS | A | 147 | 65.363 | 42.551 | 12.547 | 1.00 | 0.00 |
| ATOM | 1729 | CD   | LYS | A | 147 | 66.657 | 42.168 | 13.250 | 1.00 | 0.00 |
| ATOM | 1730 | CE   | LYS | A | 147 | 67.163 | 43.298 | 14.133 | 1.00 | 0.00 |
| ATOM | 1731 | NZ   | LYS | A | 147 | 68.406 | 42.922 | 14.861 | 1.00 | 0.00 |
| ATOM | 1732 | H    | LYS | A | 147 | 62.138 | 42.803 | 12.223 | 1.00 | 0.00 |
| ATOM | 1733 | HA   | LYS | A | 147 | 63.594 | 42.608 | 10.403 | 1.00 | 0.00 |
| ATOM | 1734 | 1HB  | LYS | A | 147 | 64.669 | 40.530 | 12.334 | 1.00 | 0.00 |
| ATOM | 1735 | 2HB  | LYS | A | 147 | 65.558 | 41.157 | 10.925 | 1.00 | 0.00 |
| ATOM | 1736 | 1HG  | LYS | A | 147 | 65.543 | 43.407 | 11.895 | 1.00 | 0.00 |
| ATOM | 1737 | 2HG  | LYS | A | 147 | 64.609 | 42.813 | 13.289 | 1.00 | 0.00 |
| ATOM | 1738 | 1HD  | LYS | A | 147 | 66.471 | 41.284 | 13.861 | 1.00 | 0.00 |
| ATOM | 1739 | 2HD  | LYS | A | 147 | 67.407 | 41.934 | 12.495 | 1.00 | 0.00 |
| ATOM | 1740 | 1HE  | LYS | A | 147 | 67.360 | 44.163 | 13.502 | 1.00 | 0.00 |
| ATOM | 1741 | 2HE  | LYS | A | 147 | 66.383 | 43.545 | 14.853 | 1.00 | 0.00 |
| ATOM | 1742 | 1HZ  | LYS | A | 147 | 68.708 | 43.697 | 15.434 | 1.00 | 0.00 |
| ATOM | 1743 | 2HZ  | LYS | A | 147 | 68.223 | 42.120 | 15.448 | 1.00 | 0.00 |
| ATOM | 1744 | 3HZ  | LYS | A | 147 | 69.130 | 42.694 | 14.194 | 1.00 | 0.00 |
| ATOM | 1745 | N    | LEU | A | 148 | 62.153 | 40.019 | 9.810  | 1.00 | 0.00 |
| ATOM | 1746 | CA   | LEU | A | 148 | 61.936 | 39.010 | 8.771  | 1.00 | 0.00 |
| ATOM | 1747 | C    | LEU | A | 148 | 61.904 | 39.641 | 7.363  | 1.00 | 0.00 |
| ATOM | 1748 | O    | LEU | A | 148 | 61.445 | 40.772 | 7.191  | 1.00 | 0.00 |
| ATOM | 1749 | CB   | LEU | A | 148 | 60.633 | 38.249 | 9.047  | 1.00 | 0.00 |
| ATOM | 1750 | CG   | LEU | A | 148 | 60.365 | 37.057 | 8.119  | 1.00 | 0.00 |
| ATOM | 1751 | CD1  | LEU | A | 148 | 61.408 | 35.971 | 8.349  | 1.00 | 0.00 |
| ATOM | 1752 | CD2  | LEU | A | 148 | 58.964 | 36.521 | 8.372  | 1.00 | 0.00 |
| ATOM | 1753 | H    | LEU | A | 148 | 61.407 | 40.225 | 10.459 | 1.00 | 0.00 |
| ATOM | 1754 | HA   | LEU | A | 148 | 62.767 | 38.305 | 8.768  | 1.00 | 0.00 |
| ATOM | 1755 | 1HB  | LEU | A | 148 | 60.844 | 37.897 | 10.056 | 1.00 | 0.00 |
| ATOM | 1756 | 2HB  | LEU | A | 148 | 59.772 | 38.916 | 9.067  | 1.00 | 0.00 |
| ATOM | 1757 | HG   | LEU | A | 148 | 60.400 | 37.429 | 7.095  | 1.00 | 0.00 |
| ATOM | 1758 | 1HD1 | LEU | A | 148 | 61.209 | 35.129 | 7.686  | 1.00 | 0.00 |
| ATOM | 1759 | 2HD1 | LEU | A | 148 | 62.400 | 36.370 | 8.140  | 1.00 | 0.00 |
| ATOM | 1760 | 3HD1 | LEU | A | 148 | 61.361 | 35.636 | 9.385  | 1.00 | 0.00 |

PEDF\_P1\_final\_docking\_model.txt

|      |      |      |     |   |     |        |        |        |      |      |
|------|------|------|-----|---|-----|--------|--------|--------|------|------|
| ATOM | 1761 | 1HD2 | LEU | A | 148 | 58.774 | 35.674 | 7.712  | 1.00 | 0.00 |
| ATOM | 1762 | 2HD2 | LEU | A | 148 | 58.879 | 36.198 | 9.410  | 1.00 | 0.00 |
| ATOM | 1763 | 3HD2 | LEU | A | 148 | 58.233 | 37.305 | 8.175  | 1.00 | 0.00 |
| ATOM | 1764 | N    | ARG | A | 149 | 62.415 | 38.918 | 6.368  | 1.00 | 0.00 |
| ATOM | 1765 | CA   | ARG | A | 149 | 62.431 | 39.408 | 4.987  | 1.00 | 0.00 |
| ATOM | 1766 | C    | ARG | A | 149 | 61.460 | 38.574 | 4.139  | 1.00 | 0.00 |
| ATOM | 1767 | O    | ARG | A | 149 | 61.677 | 37.378 | 3.922  | 1.00 | 0.00 |
| ATOM | 1768 | CB   | ARG | A | 149 | 63.831 | 39.435 | 4.391  | 1.00 | 0.00 |
| ATOM | 1769 | CG   | ARG | A | 149 | 64.792 | 40.404 | 5.061  | 1.00 | 0.00 |
| ATOM | 1770 | CD   | ARG | A | 149 | 66.176 | 40.365 | 4.521  | 1.00 | 0.00 |
| ATOM | 1771 | NE   | ARG | A | 149 | 67.090 | 41.312 | 5.138  | 1.00 | 0.00 |
| ATOM | 1772 | CZ   | ARG | A | 149 | 68.361 | 41.518 | 4.741  | 1.00 | 0.00 |
| ATOM | 1773 | NH1  | ARG | A | 149 | 68.884 | 40.822 | 3.757  | 1.00 | 0.00 |
| ATOM | 1774 | NH2  | ARG | A | 149 | 69.077 | 42.423 | 5.385  | 1.00 | 0.00 |
| ATOM | 1775 | H    | ARG | A | 149 | 62.802 | 38.007 | 6.571  | 1.00 | 0.00 |
| ATOM | 1776 | HA   | ARG | A | 149 | 62.090 | 40.443 | 4.959  | 1.00 | 0.00 |
| ATOM | 1777 | 1HB  | ARG | A | 149 | 64.228 | 38.424 | 4.466  | 1.00 | 0.00 |
| ATOM | 1778 | 2HB  | ARG | A | 149 | 63.723 | 39.706 | 3.341  | 1.00 | 0.00 |
| ATOM | 1779 | 1HG  | ARG | A | 149 | 64.410 | 41.417 | 4.933  | 1.00 | 0.00 |
| ATOM | 1780 | 2HG  | ARG | A | 149 | 64.839 | 40.165 | 6.124  | 1.00 | 0.00 |
| ATOM | 1781 | 1HD  | ARG | A | 149 | 66.587 | 39.368 | 4.673  | 1.00 | 0.00 |
| ATOM | 1782 | 2HD  | ARG | A | 149 | 66.146 | 40.587 | 3.455  | 1.00 | 0.00 |
| ATOM | 1783 | HE   | ARG | A | 149 | 66.940 | 41.938 | 5.919  | 1.00 | 0.00 |
| ATOM | 1784 | 1HH1 | ARG | A | 149 | 68.329 | 40.121 | 3.286  | 1.00 | 0.00 |
| ATOM | 1785 | 2HH1 | ARG | A | 149 | 69.839 | 40.991 | 3.475  | 1.00 | 0.00 |
| ATOM | 1786 | 1HH2 | ARG | A | 149 | 68.665 | 42.937 | 6.152  | 1.00 | 0.00 |
| ATOM | 1787 | 2HH2 | ARG | A | 149 | 70.032 | 42.597 | 5.109  | 1.00 | 0.00 |
| ATOM | 1788 | N    | ILE | A | 150 | 60.397 | 39.220 | 3.661  | 1.00 | 0.00 |
| ATOM | 1789 | CA   | ILE | A | 150 | 59.360 | 38.559 | 2.867  | 1.00 | 0.00 |
| ATOM | 1790 | C    | ILE | A | 150 | 59.548 | 38.608 | 1.346  | 1.00 | 0.00 |
| ATOM | 1791 | O    | ILE | A | 150 | 59.697 | 39.680 | 0.754  | 1.00 | 0.00 |
| ATOM | 1792 | CB   | ILE | A | 150 | 57.980 | 39.158 | 3.195  | 1.00 | 0.00 |
| ATOM | 1793 | CG1  | ILE | A | 150 | 57.705 | 39.073 | 4.698  | 1.00 | 0.00 |
| ATOM | 1794 | CG2  | ILE | A | 150 | 56.890 | 38.444 | 2.410  | 1.00 | 0.00 |
| ATOM | 1795 | CD1  | ILE | A | 150 | 56.480 | 39.842 | 5.139  | 1.00 | 0.00 |
| ATOM | 1796 | H    | ILE | A | 150 | 60.311 | 40.207 | 3.859  | 1.00 | 0.00 |
| ATOM | 1797 | HA   | ILE | A | 150 | 59.358 | 37.486 | 3.055  | 1.00 | 0.00 |
| ATOM | 1798 | HB   | ILE | A | 150 | 57.981 | 40.216 | 2.935  | 1.00 | 0.00 |
| ATOM | 1799 | 1HG1 | ILE | A | 150 | 57.581 | 38.020 | 4.946  | 1.00 | 0.00 |
| ATOM | 1800 | 2HG1 | ILE | A | 150 | 58.583 | 39.465 | 5.211  | 1.00 | 0.00 |
| ATOM | 1801 | 1HG2 | ILE | A | 150 | 55.922 | 38.879 | 2.653  | 1.00 | 0.00 |
| ATOM | 1802 | 2HG2 | ILE | A | 150 | 57.079 | 38.555 | 1.343  | 1.00 | 0.00 |
| ATOM | 1803 | 3HG2 | ILE | A | 150 | 56.888 | 37.386 | 2.670  | 1.00 | 0.00 |
| ATOM | 1804 | 1HD1 | ILE | A | 150 | 56.350 | 39.735 | 6.216  | 1.00 | 0.00 |
| ATOM | 1805 | 2HD1 | ILE | A | 150 | 56.604 | 40.898 | 4.892  | 1.00 | 0.00 |
| ATOM | 1806 | 3HD1 | ILE | A | 150 | 55.601 | 39.452 | 4.629  | 1.00 | 0.00 |
| ATOM | 1807 | N    | LYS | A | 151 | 59.517 | 37.437 | 0.718  | 1.00 | 0.00 |
| ATOM | 1808 | CA   | LYS | A | 151 | 59.665 | 37.343 | -0.726 | 1.00 | 0.00 |
| ATOM | 1809 | C    | LYS | A | 151 | 58.506 | 38.087 | -1.395 | 1.00 | 0.00 |
| ATOM | 1810 | O    | LYS | A | 151 | 57.342 | 37.845 | -1.087 | 1.00 | 0.00 |
| ATOM | 1811 | CB   | LYS | A | 151 | 59.707 | 35.882 | -1.178 | 1.00 | 0.00 |
| ATOM | 1812 | CG   | LYS | A | 151 | 60.955 | 35.125 | -0.745 | 1.00 | 0.00 |
| ATOM | 1813 | CD   | LYS | A | 151 | 60.942 | 33.694 | -1.261 | 1.00 | 0.00 |
| ATOM | 1814 | CE   | LYS | A | 151 | 62.189 | 32.938 | -0.831 | 1.00 | 0.00 |
| ATOM | 1815 | NZ   | LYS | A | 151 | 62.181 | 31.530 | -1.313 | 1.00 | 0.00 |
| ATOM | 1816 | H    | LYS | A | 151 | 59.388 | 36.592 | 1.255  | 1.00 | 0.00 |
| ATOM | 1817 | HA   | LYS | A | 151 | 60.594 | 37.825 | -1.034 | 1.00 | 0.00 |
| ATOM | 1818 | 1HB  | LYS | A | 151 | 58.824 | 35.394 | -0.763 | 1.00 | 0.00 |
| ATOM | 1819 | 2HB  | LYS | A | 151 | 59.643 | 35.882 | -2.266 | 1.00 | 0.00 |
| ATOM | 1820 | 1HG  | LYS | A | 151 | 61.829 | 35.646 | -1.137 | 1.00 | 0.00 |
| ATOM | 1821 | 2HG  | LYS | A | 151 | 60.996 | 35.119 | 0.344  | 1.00 | 0.00 |
| ATOM | 1822 | 1HD  | LYS | A | 151 | 60.057 | 33.191 | -0.868 | 1.00 | 0.00 |
| ATOM | 1823 | 2HD  | LYS | A | 151 | 60.890 | 33.718 | -2.350 | 1.00 | 0.00 |

PEDF\_P1\_final\_docking\_model.txt

|      |      |      |     |   |     |        |        |        |      |      |
|------|------|------|-----|---|-----|--------|--------|--------|------|------|
| ATOM | 1824 | 1HE  | LYS | A | 151 | 63.059 | 33.454 | -1.235 | 1.00 | 0.00 |
| ATOM | 1825 | 2HE  | LYS | A | 151 | 62.236 | 32.947 | 0.258  | 1.00 | 0.00 |
| ATOM | 1826 | 1HZ  | LYS | A | 151 | 63.023 | 31.064 | -1.006 | 1.00 | 0.00 |
| ATOM | 1827 | 2HZ  | LYS | A | 151 | 61.375 | 31.050 | -0.938 | 1.00 | 0.00 |
| ATOM | 1828 | 3HZ  | LYS | A | 151 | 62.139 | 31.520 | -2.322 | 1.00 | 0.00 |
| ATOM | 1829 | N    | SER | A | 152 | 58.835 | 39.003 | -2.301 | 1.00 | 0.00 |
| ATOM | 1830 | CA   | SER | A | 152 | 57.829 | 39.796 | -3.008 | 1.00 | 0.00 |
| ATOM | 1831 | C    | SER | A | 152 | 56.853 | 38.941 | -3.806 | 1.00 | 0.00 |
| ATOM | 1832 | O    | SER | A | 152 | 55.751 | 39.388 | -4.139 | 1.00 | 0.00 |
| ATOM | 1833 | CB   | SER | A | 152 | 58.514 | 40.790 | -3.926 | 1.00 | 0.00 |
| ATOM | 1834 | OG   | SER | A | 152 | 59.209 | 40.155 | -4.964 | 1.00 | 0.00 |
| ATOM | 1835 | H    | SER | A | 152 | 59.813 | 39.153 | -2.505 | 1.00 | 0.00 |
| ATOM | 1836 | HA   | SER | A | 152 | 57.260 | 40.457 | -2.353 | 1.00 | 0.00 |
| ATOM | 1837 | 1HB  | SER | A | 152 | 57.757 | 41.446 | -4.355 | 1.00 | 0.00 |
| ATOM | 1838 | 2HB  | SER | A | 152 | 59.215 | 41.382 | -3.339 | 1.00 | 0.00 |
| ATOM | 1839 | HG   | SER | A | 152 | 59.626 | 40.817 | -5.520 | 1.00 | 0.00 |
| ATOM | 1840 | N    | SER | A | 153 | 57.270 | 37.717 | -4.119 | 1.00 | 0.00 |
| ATOM | 1841 | CA   | SER | A | 153 | 56.433 | 36.786 | -4.865 | 1.00 | 0.00 |
| ATOM | 1842 | C    | SER | A | 153 | 55.207 | 36.458 | -4.013 | 1.00 | 0.00 |
| ATOM | 1843 | O    | SER | A | 153 | 54.170 | 36.023 | -4.523 | 1.00 | 0.00 |
| ATOM | 1844 | CB   | SER | A | 153 | 57.205 | 35.531 | -5.222 | 1.00 | 0.00 |
| ATOM | 1845 | OG   | SER | A | 153 | 57.551 | 34.785 | -4.087 | 1.00 | 0.00 |
| ATOM | 1846 | H    | SER | A | 153 | 58.193 | 37.426 | -3.831 | 1.00 | 0.00 |
| ATOM | 1847 | HA   | SER | A | 153 | 56.157 | 37.150 | -5.855 | 1.00 | 0.00 |
| ATOM | 1848 | 1HB  | SER | A | 153 | 56.587 | 34.916 | -5.876 | 1.00 | 0.00 |
| ATOM | 1849 | 2HB  | SER | A | 153 | 58.115 | 35.818 | -5.748 | 1.00 | 0.00 |
| ATOM | 1850 | HG   | SER | A | 153 | 58.036 | 34.001 | -4.356 | 1.00 | 0.00 |
| ATOM | 1851 | N    | PHE | A | 154 | 55.338 | 36.662 | -2.707 | 1.00 | 0.00 |
| ATOM | 1852 | CA   | PHE | A | 154 | 54.233 | 36.415 | -1.802 | 1.00 | 0.00 |
| ATOM | 1853 | C    | PHE | A | 154 | 53.381 | 37.673 | -1.662 | 1.00 | 0.00 |
| ATOM | 1854 | O    | PHE | A | 154 | 52.152 | 37.612 | -1.755 | 1.00 | 0.00 |
| ATOM | 1855 | CB   | PHE | A | 154 | 54.748 | 35.959 | -0.435 | 1.00 | 0.00 |
| ATOM | 1856 | CG   | PHE | A | 154 | 53.690 | 35.929 | 0.631  | 1.00 | 0.00 |
| ATOM | 1857 | CD1  | PHE | A | 154 | 52.666 | 34.995 | 0.587  | 1.00 | 0.00 |
| ATOM | 1858 | CD2  | PHE | A | 154 | 53.717 | 36.835 | 1.681  | 1.00 | 0.00 |
| ATOM | 1859 | CE1  | PHE | A | 154 | 51.692 | 34.967 | 1.567  | 1.00 | 0.00 |
| ATOM | 1860 | CE2  | PHE | A | 154 | 52.746 | 36.809 | 2.663  | 1.00 | 0.00 |
| ATOM | 1861 | CZ   | PHE | A | 154 | 51.732 | 35.873 | 2.605  | 1.00 | 0.00 |
| ATOM | 1862 | H    | PHE | A | 154 | 56.216 | 36.993 | -2.333 | 1.00 | 0.00 |
| ATOM | 1863 | HA   | PHE | A | 154 | 53.589 | 35.634 | -2.208 | 1.00 | 0.00 |
| ATOM | 1864 | 1HB  | PHE | A | 154 | 55.150 | 34.949 | -0.504 | 1.00 | 0.00 |
| ATOM | 1865 | 2HB  | PHE | A | 154 | 55.525 | 36.636 | -0.084 | 1.00 | 0.00 |
| ATOM | 1866 | HD1  | PHE | A | 154 | 52.635 | 34.278 | -0.234 | 1.00 | 0.00 |
| ATOM | 1867 | HD2  | PHE | A | 154 | 54.517 | 37.575 | 1.726  | 1.00 | 0.00 |
| ATOM | 1868 | HE1  | PHE | A | 154 | 50.893 | 34.227 | 1.520  | 1.00 | 0.00 |
| ATOM | 1869 | HE2  | PHE | A | 154 | 52.778 | 37.526 | 3.483  | 1.00 | 0.00 |
| ATOM | 1870 | HZ   | PHE | A | 154 | 50.965 | 35.852 | 3.378  | 1.00 | 0.00 |
| ATOM | 1871 | N    | VAL | A | 155 | 54.038 | 38.809 | -1.431 | 1.00 | 0.00 |
| ATOM | 1872 | CA   | VAL | A | 155 | 53.344 | 40.083 | -1.272 | 1.00 | 0.00 |
| ATOM | 1873 | C    | VAL | A | 155 | 52.509 | 40.440 | -2.503 | 1.00 | 0.00 |
| ATOM | 1874 | O    | VAL | A | 155 | 51.416 | 40.996 | -2.380 | 1.00 | 0.00 |
| ATOM | 1875 | CB   | VAL | A | 155 | 54.337 | 41.227 | -0.992 | 1.00 | 0.00 |
| ATOM | 1876 | CG1  | VAL | A | 155 | 53.624 | 42.571 | -1.028 | 1.00 | 0.00 |
| ATOM | 1877 | CG2  | VAL | A | 155 | 55.020 | 41.024 | 0.352  | 1.00 | 0.00 |
| ATOM | 1878 | H    | VAL | A | 155 | 55.046 | 38.786 | -1.364 | 1.00 | 0.00 |
| ATOM | 1879 | HA   | VAL | A | 155 | 52.619 | 40.041 | -0.458 | 1.00 | 0.00 |
| ATOM | 1880 | HB   | VAL | A | 155 | 55.119 | 41.210 | -1.751 | 1.00 | 0.00 |
| ATOM | 1881 | 1HG1 | VAL | A | 155 | 54.341 | 43.368 | -0.829 | 1.00 | 0.00 |
| ATOM | 1882 | 2HG1 | VAL | A | 155 | 53.180 | 42.721 | -2.012 | 1.00 | 0.00 |
| ATOM | 1883 | 3HG1 | VAL | A | 155 | 52.842 | 42.589 | -0.269 | 1.00 | 0.00 |
| ATOM | 1884 | 1HG2 | VAL | A | 155 | 55.718 | 41.840 | 0.533  | 1.00 | 0.00 |
| ATOM | 1885 | 2HG2 | VAL | A | 155 | 54.268 | 41.005 | 1.141  | 1.00 | 0.00 |
| ATOM | 1886 | 3HG2 | VAL | A | 155 | 55.562 | 40.078 | 0.345  | 1.00 | 0.00 |

PEDF\_P1\_final\_docking\_model.txt

|      |      |      |     |   |     |        |        |        |      |      |
|------|------|------|-----|---|-----|--------|--------|--------|------|------|
| ATOM | 1887 | N    | ALA | A | 156 | 53.024 | 40.113 | -3.685 | 1.00 | 0.00 |
| ATOM | 1888 | CA   | ALA | A | 156 | 52.324 | 40.400 | -4.933 | 1.00 | 0.00 |
| ATOM | 1889 | C    | ALA | A | 156 | 50.903 | 39.809 | -4.990 | 1.00 | 0.00 |
| ATOM | 1890 | O    | ALA | A | 156 | 49.933 | 40.535 | -5.220 | 1.00 | 0.00 |
| ATOM | 1891 | CB   | ALA | A | 156 | 53.182 | 40.122 | -6.183 | 1.00 | 0.00 |
| ATOM | 1892 | H    | ALA | A | 156 | 53.923 | 39.654 | -3.720 | 1.00 | 0.00 |
| ATOM | 1893 | HA   | ALA | A | 156 | 52.201 | 41.479 | -5.025 | 1.00 | 0.00 |
| ATOM | 1894 | 1HB  | ALA | A | 156 | 52.605 | 40.355 | -7.078 | 1.00 | 0.00 |
| ATOM | 1895 | 2HB  | ALA | A | 156 | 54.077 | 40.744 | -6.156 | 1.00 | 0.00 |
| ATOM | 1896 | 3HB  | ALA | A | 156 | 53.469 | 39.072 | -6.201 | 1.00 | 0.00 |
| ATOM | 1897 | N    | PRO | A | 157 | 50.763 | 38.484 | -4.795 | 1.00 | 0.00 |
| ATOM | 1898 | CA   | PRO | A | 157 | 49.437 | 37.859 | -4.833 | 1.00 | 0.00 |
| ATOM | 1899 | C    | PRO | A | 157 | 48.537 | 38.357 | -3.700 | 1.00 | 0.00 |
| ATOM | 1900 | O    | PRO | A | 157 | 47.346 | 38.619 | -3.902 | 1.00 | 0.00 |
| ATOM | 1901 | CB   | PRO | A | 157 | 49.731 | 36.360 | -4.713 | 1.00 | 0.00 |
| ATOM | 1902 | CG   | PRO | A | 157 | 51.095 | 36.296 | -4.115 | 1.00 | 0.00 |
| ATOM | 1903 | CD   | PRO | A | 157 | 51.808 | 37.524 | -4.616 | 1.00 | 0.00 |
| ATOM | 1904 | HA   | PRO | A | 157 | 48.880 | 38.097 | -5.751 | 1.00 | 0.00 |
| ATOM | 1905 | 1HB  | PRO | A | 157 | 48.992 | 35.854 | -4.075 | 1.00 | 0.00 |
| ATOM | 1906 | 2HB  | PRO | A | 157 | 49.703 | 35.864 | -5.695 | 1.00 | 0.00 |
| ATOM | 1907 | 1HG  | PRO | A | 157 | 51.047 | 36.287 | -3.016 | 1.00 | 0.00 |
| ATOM | 1908 | 2HG  | PRO | A | 157 | 51.621 | 35.380 | -4.422 | 1.00 | 0.00 |
| ATOM | 1909 | 1HD  | PRO | A | 157 | 52.550 | 37.897 | -3.894 | 1.00 | 0.00 |
| ATOM | 1910 | 2HD  | PRO | A | 157 | 52.343 | 37.338 | -5.559 | 1.00 | 0.00 |
| ATOM | 1911 | N    | LEU | A | 158 | 49.121 | 38.480 | -2.510 | 1.00 | 0.00 |
| ATOM | 1912 | CA   | LEU | A | 158 | 48.403 | 38.932 | -1.323 | 1.00 | 0.00 |
| ATOM | 1913 | C    | LEU | A | 158 | 47.742 | 40.303 | -1.464 | 1.00 | 0.00 |
| ATOM | 1914 | O    | LEU | A | 158 | 46.545 | 40.453 | -1.210 | 1.00 | 0.00 |
| ATOM | 1915 | CB   | LEU | A | 158 | 49.372 | 38.919 | -0.141 | 1.00 | 0.00 |
| ATOM | 1916 | CG   | LEU | A | 158 | 48.756 | 39.414 | 1.164  | 1.00 | 0.00 |
| ATOM | 1917 | CD1  | LEU | A | 158 | 47.533 | 38.600 | 1.562  | 1.00 | 0.00 |
| ATOM | 1918 | CD2  | LEU | A | 158 | 49.778 | 39.451 | 2.292  | 1.00 | 0.00 |
| ATOM | 1919 | H    | LEU | A | 158 | 50.101 | 38.249 | -2.434 | 1.00 | 0.00 |
| ATOM | 1920 | HA   | LEU | A | 158 | 47.576 | 38.253 | -1.116 | 1.00 | 0.00 |
| ATOM | 1921 | 1HB  | LEU | A | 158 | 49.573 | 37.850 | -0.088 | 1.00 | 0.00 |
| ATOM | 1922 | 2HB  | LEU | A | 158 | 50.295 | 39.451 | -0.370 | 1.00 | 0.00 |
| ATOM | 1923 | HG   | LEU | A | 158 | 48.431 | 40.442 | 0.999  | 1.00 | 0.00 |
| ATOM | 1924 | 1HD1 | LEU | A | 158 | 47.126 | 38.987 | 2.496  | 1.00 | 0.00 |
| ATOM | 1925 | 2HD1 | LEU | A | 158 | 46.777 | 38.674 | 0.780  | 1.00 | 0.00 |
| ATOM | 1926 | 3HD1 | LEU | A | 158 | 47.818 | 37.557 | 1.695  | 1.00 | 0.00 |
| ATOM | 1927 | 1HD2 | LEU | A | 158 | 49.300 | 39.810 | 3.204  | 1.00 | 0.00 |
| ATOM | 1928 | 2HD2 | LEU | A | 158 | 50.173 | 38.449 | 2.459  | 1.00 | 0.00 |
| ATOM | 1929 | 3HD2 | LEU | A | 158 | 50.594 | 40.122 | 2.023  | 1.00 | 0.00 |
| ATOM | 1930 | N    | GLU | A | 159 | 48.532 | 41.298 | -1.858 | 1.00 | 0.00 |
| ATOM | 1931 | CA   | GLU | A | 159 | 48.058 | 42.672 | -2.034 | 1.00 | 0.00 |
| ATOM | 1932 | C    | GLU | A | 159 | 47.019 | 42.756 | -3.161 | 1.00 | 0.00 |
| ATOM | 1933 | O    | GLU | A | 159 | 46.071 | 43.539 | -3.099 | 1.00 | 0.00 |
| ATOM | 1934 | CB   | GLU | A | 159 | 49.232 | 43.610 | -2.326 | 1.00 | 0.00 |
| ATOM | 1935 | CG   | GLU | A | 159 | 48.848 | 45.078 | -2.448 | 1.00 | 0.00 |
| ATOM | 1936 | CD   | GLU | A | 159 | 50.060 | 45.943 | -2.654 | 1.00 | 0.00 |
| ATOM | 1937 | OE1  | GLU | A | 159 | 51.146 | 45.416 | -2.679 | 1.00 | 0.00 |
| ATOM | 1938 | OE2  | GLU | A | 159 | 49.894 | 47.115 | -2.899 | 1.00 | 0.00 |
| ATOM | 1939 | H    | GLU | A | 159 | 49.502 | 41.085 | -2.042 | 1.00 | 0.00 |
| ATOM | 1940 | HA   | GLU | A | 159 | 47.559 | 43.010 | -1.125 | 1.00 | 0.00 |
| ATOM | 1941 | 1HB  | GLU | A | 159 | 49.946 | 43.488 | -1.511 | 1.00 | 0.00 |
| ATOM | 1942 | 2HB  | GLU | A | 159 | 49.684 | 43.274 | -3.259 | 1.00 | 0.00 |
| ATOM | 1943 | 1HG  | GLU | A | 159 | 48.125 | 45.272 | -3.240 | 1.00 | 0.00 |
| ATOM | 1944 | 2HG  | GLU | A | 159 | 48.399 | 45.306 | -1.483 | 1.00 | 0.00 |
| ATOM | 1945 | N    | LYS | A | 160 | 47.196 | 41.931 | -4.184 | 1.00 | 0.00 |
| ATOM | 1946 | CA   | LYS | A | 160 | 46.272 | 41.917 | -5.304 | 1.00 | 0.00 |
| ATOM | 1947 | C    | LYS | A | 160 | 44.893 | 41.390 | -4.896 | 1.00 | 0.00 |
| ATOM | 1948 | O    | LYS | A | 160 | 43.911 | 42.140 | -4.868 | 1.00 | 0.00 |
| ATOM | 1949 | CB   | LYS | A | 160 | 46.842 | 41.074 | -6.446 | 1.00 | 0.00 |

PEDF\_P1\_final\_docking\_model.txt

|      |      |     |     |   |     |        |        |         |      |      |
|------|------|-----|-----|---|-----|--------|--------|---------|------|------|
| ATOM | 1950 | CG  | LYS | A | 160 | 45.969 | 41.032 | -7.693  | 1.00 | 0.00 |
| ATOM | 1951 | CD  | LYS | A | 160 | 46.631 | 40.231 | -8.805  | 1.00 | 0.00 |
| ATOM | 1952 | CE  | LYS | A | 160 | 45.758 | 40.186 | -10.050 | 1.00 | 0.00 |
| ATOM | 1953 | NZ  | LYS | A | 160 | 46.387 | 39.394 | -11.142 | 1.00 | 0.00 |
| ATOM | 1954 | H   | LYS | A | 160 | 47.985 | 41.300 | -4.189  | 1.00 | 0.00 |
| ATOM | 1955 | HA  | LYS | A | 160 | 46.113 | 42.934 | -5.664  | 1.00 | 0.00 |
| ATOM | 1956 | 1HB | LYS | A | 160 | 47.816 | 41.496 | -6.699  | 1.00 | 0.00 |
| ATOM | 1957 | 2HB | LYS | A | 160 | 46.974 | 40.063 | -6.062  | 1.00 | 0.00 |
| ATOM | 1958 | 1HG | LYS | A | 160 | 45.015 | 40.573 | -7.432  | 1.00 | 0.00 |
| ATOM | 1959 | 2HG | LYS | A | 160 | 45.800 | 42.053 | -8.032  | 1.00 | 0.00 |
| ATOM | 1960 | 1HD | LYS | A | 160 | 47.587 | 40.697 | -9.047  | 1.00 | 0.00 |
| ATOM | 1961 | 2HD | LYS | A | 160 | 46.803 | 39.216 | -8.446  | 1.00 | 0.00 |
| ATOM | 1962 | 1HE | LYS | A | 160 | 44.802 | 39.738 | -9.782  | 1.00 | 0.00 |
| ATOM | 1963 | 2HE | LYS | A | 160 | 45.596 | 41.208 | -10.391 | 1.00 | 0.00 |
| ATOM | 1964 | 1HZ | LYS | A | 160 | 45.778 | 39.389 | -11.948 | 1.00 | 0.00 |
| ATOM | 1965 | 2HZ | LYS | A | 160 | 47.273 | 39.810 | -11.392 | 1.00 | 0.00 |
| ATOM | 1966 | 3HZ | LYS | A | 160 | 46.536 | 38.446 | -10.827 | 1.00 | 0.00 |
| ATOM | 1967 | N   | SER | A | 161 | 44.831 | 40.103 | -4.569  | 1.00 | 0.00 |
| ATOM | 1968 | CA  | SER | A | 161 | 43.583 | 39.459 | -4.188  | 1.00 | 0.00 |
| ATOM | 1969 | C   | SER | A | 161 | 42.964 | 39.897 | -2.859  | 1.00 | 0.00 |
| ATOM | 1970 | O   | SER | A | 161 | 41.747 | 40.036 | -2.761  | 1.00 | 0.00 |
| ATOM | 1971 | CB  | SER | A | 161 | 43.807 | 37.960 | -4.164  | 1.00 | 0.00 |
| ATOM | 1972 | OG  | SER | A | 161 | 43.898 | 37.420 | -5.453  | 1.00 | 0.00 |
| ATOM | 1973 | H   | SER | A | 161 | 45.681 | 39.557 | -4.587  | 1.00 | 0.00 |
| ATOM | 1974 | HA  | SER | A | 161 | 42.795 | 39.565 | -4.935  | 1.00 | 0.00 |
| ATOM | 1975 | 1HB | SER | A | 161 | 44.733 | 37.754 | -3.627  | 1.00 | 0.00 |
| ATOM | 1976 | 2HB | SER | A | 161 | 42.974 | 37.491 | -3.641  | 1.00 | 0.00 |
| ATOM | 1977 | HG  | SER | A | 161 | 43.016 | 37.308 | -5.816  | 1.00 | 0.00 |
| ATOM | 1978 | N   | TYR | A | 162 | 43.777 | 40.117 | -1.834  | 1.00 | 0.00 |
| ATOM | 1979 | CA  | TYR | A | 162 | 43.215 | 40.507 | -0.549  | 1.00 | 0.00 |
| ATOM | 1980 | C   | TYR | A | 162 | 43.383 | 41.971 | -0.176  | 1.00 | 0.00 |
| ATOM | 1981 | O   | TYR | A | 162 | 42.901 | 42.413 | 0.870   | 1.00 | 0.00 |
| ATOM | 1982 | CB  | TYR | A | 162 | 43.829 | 39.640 | 0.553   | 1.00 | 0.00 |
| ATOM | 1983 | CG  | TYR | A | 162 | 43.523 | 38.165 | 0.414   | 1.00 | 0.00 |
| ATOM | 1984 | CD1 | TYR | A | 162 | 44.357 | 37.330 | -0.316  | 1.00 | 0.00 |
| ATOM | 1985 | CD2 | TYR | A | 162 | 42.403 | 37.612 | 1.016   | 1.00 | 0.00 |
| ATOM | 1986 | CE1 | TYR | A | 162 | 44.082 | 35.983 | -0.446  | 1.00 | 0.00 |
| ATOM | 1987 | CE2 | TYR | A | 162 | 42.119 | 36.266 | 0.893   | 1.00 | 0.00 |
| ATOM | 1988 | CZ  | TYR | A | 162 | 42.961 | 35.454 | 0.161   | 1.00 | 0.00 |
| ATOM | 1989 | OH  | TYR | A | 162 | 42.683 | 34.112 | 0.037   | 1.00 | 0.00 |
| ATOM | 1990 | H   | TYR | A | 162 | 44.778 | 40.020 | -1.924  | 1.00 | 0.00 |
| ATOM | 1991 | HA  | TYR | A | 162 | 42.134 | 40.364 | -0.559  | 1.00 | 0.00 |
| ATOM | 1992 | 1HB | TYR | A | 162 | 44.909 | 39.792 | 0.520   | 1.00 | 0.00 |
| ATOM | 1993 | 2HB | TYR | A | 162 | 43.440 | 40.004 | 1.503   | 1.00 | 0.00 |
| ATOM | 1994 | HD1 | TYR | A | 162 | 45.240 | 37.755 | -0.792  | 1.00 | 0.00 |
| ATOM | 1995 | HD2 | TYR | A | 162 | 41.741 | 38.258 | 1.592   | 1.00 | 0.00 |
| ATOM | 1996 | HE1 | TYR | A | 162 | 44.746 | 35.339 | -1.022  | 1.00 | 0.00 |
| ATOM | 1997 | HE2 | TYR | A | 162 | 41.232 | 35.850 | 1.373   | 1.00 | 0.00 |
| ATOM | 1998 | HH  | TYR | A | 162 | 43.127 | 33.705 | -0.711  | 1.00 | 0.00 |
| ATOM | 1999 | N   | GLY | A | 163 | 44.056 | 42.719 | -1.043  | 1.00 | 0.00 |
| ATOM | 2000 | CA  | GLY | A | 163 | 44.269 | 44.135 | -0.808  | 1.00 | 0.00 |
| ATOM | 2001 | C   | GLY | A | 163 | 44.802 | 44.480 | 0.566   | 1.00 | 0.00 |
| ATOM | 2002 | O   | GLY | A | 163 | 44.244 | 45.320 | 1.264   | 1.00 | 0.00 |
| ATOM | 2003 | H   | GLY | A | 163 | 44.428 | 42.298 | -1.882  | 1.00 | 0.00 |
| ATOM | 2004 | 1HA | GLY | A | 163 | 44.988 | 44.513 | -1.535  | 1.00 | 0.00 |
| ATOM | 2005 | 2HA | GLY | A | 163 | 43.323 | 44.662 | -0.927  | 1.00 | 0.00 |
| ATOM | 2006 | N   | THR | A | 164 | 45.890 | 43.832 | 0.958   | 1.00 | 0.00 |
| ATOM | 2007 | CA  | THR | A | 164 | 46.499 | 44.091 | 2.253   | 1.00 | 0.00 |
| ATOM | 2008 | C   | THR | A | 164 | 47.981 | 43.713 | 2.193   | 1.00 | 0.00 |
| ATOM | 2009 | O   | THR | A | 164 | 48.363 | 42.738 | 1.542   | 1.00 | 0.00 |
| ATOM | 2010 | CB  | THR | A | 164 | 45.807 | 43.306 | 3.383   | 1.00 | 0.00 |
| ATOM | 2011 | OG1 | THR | A | 164 | 46.394 | 43.659 | 4.642   | 1.00 | 0.00 |
| ATOM | 2012 | CG2 | THR | A | 164 | 45.954 | 41.809 | 3.160   | 1.00 | 0.00 |



PEDF\_P1\_final\_docking\_model.txt

|      |      |      |     |   |     |        |        |        |      |      |
|------|------|------|-----|---|-----|--------|--------|--------|------|------|
| ATOM | 2013 | H    | THR | A | 164 | 46.307 | 43.144 | 0.347  | 1.00 | 0.00 |
| ATOM | 2014 | HA   | THR | A | 164 | 46.437 | 45.155 | 2.484  | 1.00 | 0.00 |
| ATOM | 2015 | HB   | THR | A | 164 | 44.749 | 43.568 | 3.399  | 1.00 | 0.00 |
| ATOM | 2016 | HG1  | THR | A | 164 | 45.960 | 43.168 | 5.345  | 1.00 | 0.00 |
| ATOM | 2017 | 1HG2 | THR | A | 164 | 45.458 | 41.272 | 3.968  | 1.00 | 0.00 |
| ATOM | 2018 | 2HG2 | THR | A | 164 | 45.498 | 41.537 | 2.208  | 1.00 | 0.00 |
| ATOM | 2019 | 3HG2 | THR | A | 164 | 47.011 | 41.547 | 3.145  | 1.00 | 0.00 |
| ATOM | 2020 | N    | ARG | A | 165 | 48.814 | 44.512 | 2.851  | 1.00 | 0.00 |
| ATOM | 2021 | CA   | ARG | A | 165 | 50.251 | 44.265 | 2.895  | 1.00 | 0.00 |
| ATOM | 2022 | C    | ARG | A | 165 | 50.645 | 43.783 | 4.282  | 1.00 | 0.00 |
| ATOM | 2023 | O    | ARG | A | 165 | 50.077 | 44.210 | 5.294  | 1.00 | 0.00 |
| ATOM | 2024 | CB   | ARG | A | 165 | 51.068 | 45.474 | 2.463  | 1.00 | 0.00 |
| ATOM | 2025 | CG   | ARG | A | 165 | 50.907 | 45.865 | 1.002  | 1.00 | 0.00 |
| ATOM | 2026 | CD   | ARG | A | 165 | 51.664 | 47.080 | 0.607  | 1.00 | 0.00 |
| ATOM | 2027 | NE   | ARG | A | 165 | 51.206 | 48.308 | 1.238  | 1.00 | 0.00 |
| ATOM | 2028 | CZ   | ARG | A | 165 | 51.850 | 49.489 | 1.172  | 1.00 | 0.00 |
| ATOM | 2029 | NH1  | ARG | A | 165 | 52.997 | 49.600 | 0.540  | 1.00 | 0.00 |
| ATOM | 2030 | NH2  | ARG | A | 165 | 51.311 | 50.529 | 1.783  | 1.00 | 0.00 |
| ATOM | 2031 | H    | ARG | A | 165 | 48.438 | 45.315 | 3.335  | 1.00 | 0.00 |
| ATOM | 2032 | HA   | ARG | A | 165 | 50.512 | 43.478 | 2.187  | 1.00 | 0.00 |
| ATOM | 2033 | 1HB  | ARG | A | 165 | 50.762 | 46.307 | 3.094  | 1.00 | 0.00 |
| ATOM | 2034 | 2HB  | ARG | A | 165 | 52.114 | 45.236 | 2.657  | 1.00 | 0.00 |
| ATOM | 2035 | 1HG  | ARG | A | 165 | 51.253 | 45.038 | 0.381  | 1.00 | 0.00 |
| ATOM | 2036 | 2HG  | ARG | A | 165 | 49.850 | 46.049 | 0.807  | 1.00 | 0.00 |
| ATOM | 2037 | 1HD  | ARG | A | 165 | 52.712 | 46.948 | 0.875  | 1.00 | 0.00 |
| ATOM | 2038 | 2HD  | ARG | A | 165 | 51.580 | 47.215 | -0.470 | 1.00 | 0.00 |
| ATOM | 2039 | HE   | ARG | A | 165 | 50.380 | 48.475 | 1.797  | 1.00 | 0.00 |
| ATOM | 2040 | 1HH1 | ARG | A | 165 | 53.406 | 48.791 | 0.093  | 1.00 | 0.00 |
| ATOM | 2041 | 2HH1 | ARG | A | 165 | 53.465 | 50.494 | 0.502  | 1.00 | 0.00 |
| ATOM | 2042 | 1HH2 | ARG | A | 165 | 50.437 | 50.422 | 2.280  | 1.00 | 0.00 |
| ATOM | 2043 | 2HH2 | ARG | A | 165 | 51.773 | 51.426 | 1.750  | 1.00 | 0.00 |
| ATOM | 2044 | N    | PRO | A | 166 | 51.622 | 42.873 | 4.346  | 1.00 | 0.00 |
| ATOM | 2045 | CA   | PRO | A | 166 | 52.101 | 42.322 | 5.615  | 1.00 | 0.00 |
| ATOM | 2046 | C    | PRO | A | 166 | 52.840 | 43.376 | 6.411  | 1.00 | 0.00 |
| ATOM | 2047 | O    | PRO | A | 166 | 53.494 | 44.248 | 5.846  | 1.00 | 0.00 |
| ATOM | 2048 | CB   | PRO | A | 166 | 53.016 | 41.162 | 5.209  | 1.00 | 0.00 |
| ATOM | 2049 | CG   | PRO | A | 166 | 53.494 | 41.526 | 3.844  | 1.00 | 0.00 |
| ATOM | 2050 | CD   | PRO | A | 166 | 52.343 | 42.252 | 3.199  | 1.00 | 0.00 |
| ATOM | 2051 | HA   | PRO | A | 166 | 51.283 | 41.985 | 6.268  | 1.00 | 0.00 |
| ATOM | 2052 | 1HB  | PRO | A | 166 | 53.858 | 41.049 | 5.908  | 1.00 | 0.00 |
| ATOM | 2053 | 2HB  | PRO | A | 166 | 52.474 | 40.205 | 5.199  | 1.00 | 0.00 |
| ATOM | 2054 | 1HG  | PRO | A | 166 | 54.387 | 42.166 | 3.893  | 1.00 | 0.00 |
| ATOM | 2055 | 2HG  | PRO | A | 166 | 53.770 | 40.631 | 3.268  | 1.00 | 0.00 |
| ATOM | 2056 | 1HD  | PRO | A | 166 | 52.681 | 43.028 | 2.498  | 1.00 | 0.00 |
| ATOM | 2057 | 2HD  | PRO | A | 166 | 51.687 | 41.573 | 2.634  | 1.00 | 0.00 |
| ATOM | 2058 | N    | ARG | A | 167 | 52.724 | 43.304 | 7.726  | 1.00 | 0.00 |
| ATOM | 2059 | CA   | ARG | A | 167 | 53.411 | 44.245 | 8.586  | 1.00 | 0.00 |
| ATOM | 2060 | C    | ARG | A | 167 | 54.552 | 43.476 | 9.229  | 1.00 | 0.00 |
| ATOM | 2061 | O    | ARG | A | 167 | 54.369 | 42.336 | 9.654  | 1.00 | 0.00 |
| ATOM | 2062 | CB   | ARG | A | 167 | 52.501 | 44.917 | 9.604  | 1.00 | 0.00 |
| ATOM | 2063 | CG   | ARG | A | 167 | 53.195 | 45.907 | 10.526 | 1.00 | 0.00 |
| ATOM | 2064 | CD   | ARG | A | 167 | 52.296 | 46.557 | 11.514 | 1.00 | 0.00 |
| ATOM | 2065 | NE   | ARG | A | 167 | 51.295 | 47.437 | 10.931 | 1.00 | 0.00 |
| ATOM | 2066 | CZ   | ARG | A | 167 | 51.513 | 48.721 | 10.586 | 1.00 | 0.00 |
| ATOM | 2067 | NH1  | ARG | A | 167 | 52.680 | 49.290 | 10.796 | 1.00 | 0.00 |
| ATOM | 2068 | NH2  | ARG | A | 167 | 50.515 | 49.402 | 10.051 | 1.00 | 0.00 |
| ATOM | 2069 | H    | ARG | A | 167 | 52.150 | 42.585 | 8.143  | 1.00 | 0.00 |
| ATOM | 2070 | HA   | ARG | A | 167 | 53.811 | 45.066 | 7.990  | 1.00 | 0.00 |
| ATOM | 2071 | 1HB  | ARG | A | 167 | 51.722 | 45.432 | 9.044  | 1.00 | 0.00 |
| ATOM | 2072 | 2HB  | ARG | A | 167 | 52.054 | 44.123 | 10.203 | 1.00 | 0.00 |
| ATOM | 2073 | 1HG  | ARG | A | 167 | 53.975 | 45.382 | 11.077 | 1.00 | 0.00 |
| ATOM | 2074 | 2HG  | ARG | A | 167 | 53.646 | 46.691 | 9.915  | 1.00 | 0.00 |
| ATOM | 2075 | 1HD  | ARG | A | 167 | 51.766 | 45.785 | 12.072 | 1.00 | 0.00 |

PEDF\_P1\_final\_docking\_model.txt

|      |      |      |     |   |     |        |        |        |      |      |
|------|------|------|-----|---|-----|--------|--------|--------|------|------|
| ATOM | 2076 | 2HD  | ARG | A | 167 | 52.896 | 47.154 | 12.200 | 1.00 | 0.00 |
| ATOM | 2077 | HE   | ARG | A | 167 | 50.329 | 47.250 | 10.700 | 1.00 | 0.00 |
| ATOM | 2078 | 1HH1 | ARG | A | 167 | 53.427 | 48.761 | 11.222 | 1.00 | 0.00 |
| ATOM | 2079 | 2HH1 | ARG | A | 167 | 52.823 | 50.253 | 10.530 | 1.00 | 0.00 |
| ATOM | 2080 | 1HH2 | ARG | A | 167 | 49.619 | 48.954 | 9.913  | 1.00 | 0.00 |
| ATOM | 2081 | 2HH2 | ARG | A | 167 | 50.651 | 50.365 | 9.784  | 1.00 | 0.00 |
| ATOM | 2082 | N    | VAL | A | 168 | 55.741 | 44.067 | 9.273  | 1.00 | 0.00 |
| ATOM | 2083 | CA   | VAL | A | 168 | 56.859 | 43.378 | 9.916  | 1.00 | 0.00 |
| ATOM | 2084 | C    | VAL | A | 168 | 57.112 | 44.076 | 11.241 | 1.00 | 0.00 |
| ATOM | 2085 | O    | VAL | A | 168 | 57.382 | 45.271 | 11.279 | 1.00 | 0.00 |
| ATOM | 2086 | CB   | VAL | A | 168 | 58.140 | 43.392 | 9.060  | 1.00 | 0.00 |
| ATOM | 2087 | CG1  | VAL | A | 168 | 59.277 | 42.696 | 9.793  | 1.00 | 0.00 |
| ATOM | 2088 | CG2  | VAL | A | 168 | 57.889 | 42.727 | 7.716  | 1.00 | 0.00 |
| ATOM | 2089 | H    | VAL | A | 168 | 55.892 | 44.982 | 8.873  | 1.00 | 0.00 |
| ATOM | 2090 | HA   | VAL | A | 168 | 56.612 | 42.338 | 10.133 | 1.00 | 0.00 |
| ATOM | 2091 | HB   | VAL | A | 168 | 58.418 | 44.426 | 8.855  | 1.00 | 0.00 |
| ATOM | 2092 | 1HG1 | VAL | A | 168 | 60.175 | 42.716 | 9.174  | 1.00 | 0.00 |
| ATOM | 2093 | 2HG1 | VAL | A | 168 | 59.474 | 43.213 | 10.733 | 1.00 | 0.00 |
| ATOM | 2094 | 3HG1 | VAL | A | 168 | 59.000 | 41.662 | 9.997  | 1.00 | 0.00 |
| ATOM | 2095 | 1HG2 | VAL | A | 168 | 58.804 | 42.746 | 7.124  | 1.00 | 0.00 |
| ATOM | 2096 | 2HG2 | VAL | A | 168 | 57.580 | 41.693 | 7.874  | 1.00 | 0.00 |
| ATOM | 2097 | 3HG2 | VAL | A | 168 | 57.103 | 43.264 | 7.185  | 1.00 | 0.00 |
| ATOM | 2098 | N    | LEU | A | 169 | 57.005 | 43.317 | 12.325 | 1.00 | 0.00 |
| ATOM | 2099 | CA   | LEU | A | 169 | 57.197 | 43.849 | 13.667 | 1.00 | 0.00 |
| ATOM | 2100 | C    | LEU | A | 169 | 58.533 | 44.576 | 13.879 | 1.00 | 0.00 |
| ATOM | 2101 | O    | LEU | A | 169 | 59.584 | 44.185 | 13.354 | 1.00 | 0.00 |
| ATOM | 2102 | CB   | LEU | A | 169 | 57.062 | 42.707 | 14.682 | 1.00 | 0.00 |
| ATOM | 2103 | CG   | LEU | A | 169 | 55.623 | 42.264 | 14.979 | 1.00 | 0.00 |
| ATOM | 2104 | CD1  | LEU | A | 169 | 55.630 | 41.038 | 15.881 | 1.00 | 0.00 |
| ATOM | 2105 | CD2  | LEU | A | 169 | 54.863 | 43.409 | 15.631 | 1.00 | 0.00 |
| ATOM | 2106 | H    | LEU | A | 169 | 56.783 | 42.338 | 12.211 | 1.00 | 0.00 |
| ATOM | 2107 | HA   | LEU | A | 169 | 56.442 | 44.608 | 13.870 | 1.00 | 0.00 |
| ATOM | 2108 | 1HB  | LEU | A | 169 | 57.589 | 41.924 | 14.139 | 1.00 | 0.00 |
| ATOM | 2109 | 2HB  | LEU | A | 169 | 57.591 | 42.925 | 15.609 | 1.00 | 0.00 |
| ATOM | 2110 | HG   | LEU | A | 169 | 55.146 | 42.050 | 14.022 | 1.00 | 0.00 |
| ATOM | 2111 | 1HD1 | LEU | A | 169 | 54.604 | 40.731 | 16.086 | 1.00 | 0.00 |
| ATOM | 2112 | 2HD1 | LEU | A | 169 | 56.159 | 40.224 | 15.385 | 1.00 | 0.00 |
| ATOM | 2113 | 3HD1 | LEU | A | 169 | 56.130 | 41.279 | 16.818 | 1.00 | 0.00 |
| ATOM | 2114 | 1HD2 | LEU | A | 169 | 53.840 | 43.094 | 15.840 | 1.00 | 0.00 |
| ATOM | 2115 | 2HD2 | LEU | A | 169 | 55.355 | 43.690 | 16.562 | 1.00 | 0.00 |
| ATOM | 2116 | 3HD2 | LEU | A | 169 | 54.846 | 44.266 | 14.957 | 1.00 | 0.00 |
| ATOM | 2117 | N    | THR | A | 170 | 58.463 | 45.650 | 14.658 | 1.00 | 0.00 |
| ATOM | 2118 | CA   | THR | A | 170 | 59.606 | 46.494 | 14.968 | 1.00 | 0.00 |
| ATOM | 2119 | C    | THR | A | 170 | 60.472 | 45.958 | 16.102 | 1.00 | 0.00 |
| ATOM | 2120 | O    | THR | A | 170 | 61.676 | 46.220 | 16.144 | 1.00 | 0.00 |
| ATOM | 2121 | CB   | THR | A | 170 | 59.150 | 47.919 | 15.333 | 1.00 | 0.00 |
| ATOM | 2122 | OG1  | THR | A | 170 | 58.436 | 48.492 | 14.229 | 1.00 | 0.00 |
| ATOM | 2123 | CG2  | THR | A | 170 | 60.348 | 48.794 | 15.667 | 1.00 | 0.00 |
| ATOM | 2124 | H    | THR | A | 170 | 57.561 | 45.881 | 15.049 | 1.00 | 0.00 |
| ATOM | 2125 | HA   | THR | A | 170 | 60.273 | 46.543 | 14.107 | 1.00 | 0.00 |
| ATOM | 2126 | HB   | THR | A | 170 | 58.486 | 47.868 | 16.196 | 1.00 | 0.00 |
| ATOM | 2127 | HG1  | THR | A | 170 | 57.668 | 47.952 | 14.030 | 1.00 | 0.00 |
| ATOM | 2128 | 1HG2 | THR | A | 170 | 60.005 | 49.796 | 15.922 | 1.00 | 0.00 |
| ATOM | 2129 | 2HG2 | THR | A | 170 | 60.885 | 48.366 | 16.513 | 1.00 | 0.00 |
| ATOM | 2130 | 3HG2 | THR | A | 170 | 61.011 | 48.845 | 14.804 | 1.00 | 0.00 |
| ATOM | 2131 | N    | GLY | A | 171 | 59.863 | 45.207 | 17.016 | 1.00 | 0.00 |
| ATOM | 2132 | CA   | GLY | A | 171 | 60.607 | 44.666 | 18.138 | 1.00 | 0.00 |
| ATOM | 2133 | C    | GLY | A | 171 | 60.348 | 45.474 | 19.397 | 1.00 | 0.00 |
| ATOM | 2134 | O    | GLY | A | 171 | 60.411 | 44.946 | 20.508 | 1.00 | 0.00 |
| ATOM | 2135 | H    | GLY | A | 171 | 58.876 | 45.006 | 16.937 | 1.00 | 0.00 |
| ATOM | 2136 | 1HA  | GLY | A | 171 | 60.299 | 43.634 | 18.305 | 1.00 | 0.00 |
| ATOM | 2137 | 2HA  | GLY | A | 171 | 61.671 | 44.694 | 17.906 | 1.00 | 0.00 |
| ATOM | 2138 | N    | ASN | A | 172 | 60.060 | 46.762 | 19.220 | 1.00 | 0.00 |

PEDF\_P1\_final\_docking\_model.txt

|      |      |      |     |   |     |        |        |        |      |      |
|------|------|------|-----|---|-----|--------|--------|--------|------|------|
| ATOM | 2139 | CA   | ASN | A | 172 | 59.775 | 47.657 | 20.333 | 1.00 | 0.00 |
| ATOM | 2140 | C    | ASN | A | 172 | 58.323 | 47.440 | 20.729 | 1.00 | 0.00 |
| ATOM | 2141 | O    | ASN | A | 172 | 57.408 | 47.809 | 19.995 | 1.00 | 0.00 |
| ATOM | 2142 | CB   | ASN | A | 172 | 60.040 | 49.112 | 19.993 | 1.00 | 0.00 |
| ATOM | 2143 | CG   | ASN | A | 172 | 59.856 | 50.048 | 21.155 | 1.00 | 0.00 |
| ATOM | 2144 | OD1  | ASN | A | 172 | 58.766 | 50.149 | 21.731 | 1.00 | 0.00 |
| ATOM | 2145 | ND2  | ASN | A | 172 | 60.891 | 50.792 | 21.451 | 1.00 | 0.00 |
| ATOM | 2146 | H    | ASN | A | 172 | 60.040 | 47.126 | 18.278 | 1.00 | 0.00 |
| ATOM | 2147 | HA   | ASN | A | 172 | 60.414 | 47.407 | 21.181 | 1.00 | 0.00 |
| ATOM | 2148 | 1HB  | ASN | A | 172 | 60.933 | 49.402 | 19.438 | 1.00 | 0.00 |
| ATOM | 2149 | 2HB  | ASN | A | 172 | 59.169 | 49.185 | 19.342 | 1.00 | 0.00 |
| ATOM | 2150 | 1HD2 | ASN | A | 172 | 60.841 | 51.438 | 22.213 | 1.00 | 0.00 |
| ATOM | 2151 | 2HD2 | ASN | A | 172 | 61.732 | 50.714 | 20.915 | 1.00 | 0.00 |
| ATOM | 2152 | N    | PRO | A | 173 | 58.088 | 46.835 | 21.898 | 1.00 | 0.00 |
| ATOM | 2153 | CA   | PRO | A | 173 | 56.722 | 46.577 | 22.368 | 1.00 | 0.00 |
| ATOM | 2154 | C    | PRO | A | 173 | 55.751 | 47.763 | 22.311 | 1.00 | 0.00 |
| ATOM | 2155 | O    | PRO | A | 173 | 54.664 | 47.641 | 21.751 | 1.00 | 0.00 |
| ATOM | 2156 | CB   | PRO | A | 173 | 56.943 | 46.115 | 23.812 | 1.00 | 0.00 |
| ATOM | 2157 | CG   | PRO | A | 173 | 58.276 | 45.448 | 23.788 | 1.00 | 0.00 |
| ATOM | 2158 | CD   | PRO | A | 173 | 59.136 | 46.307 | 22.901 | 1.00 | 0.00 |
| ATOM | 2159 | HA   | PRO | A | 173 | 56.197 | 45.826 | 21.759 | 1.00 | 0.00 |
| ATOM | 2160 | 1HB  | PRO | A | 173 | 56.934 | 46.963 | 24.512 | 1.00 | 0.00 |
| ATOM | 2161 | 2HB  | PRO | A | 173 | 56.155 | 45.419 | 24.137 | 1.00 | 0.00 |
| ATOM | 2162 | 1HG  | PRO | A | 173 | 58.701 | 45.373 | 24.800 | 1.00 | 0.00 |
| ATOM | 2163 | 2HG  | PRO | A | 173 | 58.201 | 44.423 | 23.395 | 1.00 | 0.00 |
| ATOM | 2164 | 1HD  | PRO | A | 173 | 59.632 | 47.115 | 23.458 | 1.00 | 0.00 |
| ATOM | 2165 | 2HD  | PRO | A | 173 | 59.928 | 45.728 | 22.402 | 1.00 | 0.00 |
| ATOM | 2166 | N    | ARG | A | 174 | 56.134 | 48.903 | 22.881 | 1.00 | 0.00 |
| ATOM | 2167 | CA   | ARG | A | 174 | 55.262 | 50.078 | 22.872 | 1.00 | 0.00 |
| ATOM | 2168 | C    | ARG | A | 174 | 54.987 | 50.646 | 21.486 | 1.00 | 0.00 |
| ATOM | 2169 | O    | ARG | A | 174 | 53.897 | 51.149 | 21.232 | 1.00 | 0.00 |
| ATOM | 2170 | CB   | ARG | A | 174 | 55.790 | 51.164 | 23.798 | 1.00 | 0.00 |
| ATOM | 2171 | CG   | ARG | A | 174 | 55.673 | 50.852 | 25.281 | 1.00 | 0.00 |
| ATOM | 2172 | CD   | ARG | A | 174 | 56.261 | 51.885 | 26.172 | 1.00 | 0.00 |
| ATOM | 2173 | NE   | ARG | A | 174 | 56.166 | 51.582 | 27.591 | 1.00 | 0.00 |
| ATOM | 2174 | CZ   | ARG | A | 174 | 56.719 | 52.323 | 28.571 | 1.00 | 0.00 |
| ATOM | 2175 | NH1  | ARG | A | 174 | 57.438 | 53.388 | 28.291 | 1.00 | 0.00 |
| ATOM | 2176 | NH2  | ARG | A | 174 | 56.541 | 51.937 | 29.822 | 1.00 | 0.00 |
| ATOM | 2177 | H    | ARG | A | 174 | 57.038 | 48.964 | 23.328 | 1.00 | 0.00 |
| ATOM | 2178 | HA   | ARG | A | 174 | 54.278 | 49.810 | 23.259 | 1.00 | 0.00 |
| ATOM | 2179 | 1HB  | ARG | A | 174 | 56.838 | 51.317 | 23.544 | 1.00 | 0.00 |
| ATOM | 2180 | 2HB  | ARG | A | 174 | 55.227 | 52.071 | 23.577 | 1.00 | 0.00 |
| ATOM | 2181 | 1HG  | ARG | A | 174 | 54.617 | 50.754 | 25.533 | 1.00 | 0.00 |
| ATOM | 2182 | 2HG  | ARG | A | 174 | 56.183 | 49.908 | 25.478 | 1.00 | 0.00 |
| ATOM | 2183 | 1HD  | ARG | A | 174 | 57.318 | 51.998 | 25.933 | 1.00 | 0.00 |
| ATOM | 2184 | 2HD  | ARG | A | 174 | 55.747 | 52.831 | 26.005 | 1.00 | 0.00 |
| ATOM | 2185 | HE   | ARG | A | 174 | 55.700 | 50.814 | 28.056 | 1.00 | 0.00 |
| ATOM | 2186 | 1HH1 | ARG | A | 174 | 57.580 | 53.659 | 27.328 | 1.00 | 0.00 |
| ATOM | 2187 | 2HH1 | ARG | A | 174 | 57.844 | 53.930 | 29.039 | 1.00 | 0.00 |
| ATOM | 2188 | 1HH2 | ARG | A | 174 | 56.000 | 51.106 | 30.019 | 1.00 | 0.00 |
| ATOM | 2189 | 2HH2 | ARG | A | 174 | 56.945 | 52.474 | 30.575 | 1.00 | 0.00 |
| ATOM | 2190 | N    | LEU | A | 175 | 55.972 | 50.567 | 20.598 | 1.00 | 0.00 |
| ATOM | 2191 | CA   | LEU | A | 175 | 55.836 | 51.087 | 19.242 | 1.00 | 0.00 |
| ATOM | 2192 | C    | LEU | A | 175 | 54.991 | 50.156 | 18.364 | 1.00 | 0.00 |
| ATOM | 2193 | O    | LEU | A | 175 | 54.184 | 50.624 | 17.555 | 1.00 | 0.00 |
| ATOM | 2194 | CB   | LEU | A | 175 | 57.222 | 51.297 | 18.620 | 1.00 | 0.00 |
| ATOM | 2195 | CG   | LEU | A | 175 | 58.069 | 52.398 | 19.270 | 1.00 | 0.00 |
| ATOM | 2196 | CD1  | LEU | A | 175 | 59.466 | 52.409 | 18.663 | 1.00 | 0.00 |
| ATOM | 2197 | CD2  | LEU | A | 175 | 57.388 | 53.745 | 19.078 | 1.00 | 0.00 |
| ATOM | 2198 | H    | LEU | A | 175 | 56.841 | 50.133 | 20.873 | 1.00 | 0.00 |
| ATOM | 2199 | HA   | LEU | A | 175 | 55.310 | 52.041 | 19.268 | 1.00 | 0.00 |
| ATOM | 2200 | 1HB  | LEU | A | 175 | 57.658 | 50.320 | 18.825 | 1.00 | 0.00 |
| ATOM | 2201 | 2HB  | LEU | A | 175 | 57.162 | 51.449 | 17.542 | 1.00 | 0.00 |

PEDF\_P1\_final\_docking\_model.txt

|      |      |      |     |   |     |        |        |        |      |      |
|------|------|------|-----|---|-----|--------|--------|--------|------|------|
| ATOM | 2202 | HG   | LEU | A | 175 | 58.104 | 52.192 | 20.340 | 1.00 | 0.00 |
| ATOM | 2203 | 1HD1 | LEU | A | 175 | 60.060 | 53.194 | 19.131 | 1.00 | 0.00 |
| ATOM | 2204 | 2HD1 | LEU | A | 175 | 59.944 | 51.444 | 18.833 | 1.00 | 0.00 |
| ATOM | 2205 | 3HD1 | LEU | A | 175 | 59.396 | 52.597 | 17.592 | 1.00 | 0.00 |
| ATOM | 2206 | 1HD2 | LEU | A | 175 | 57.990 | 54.527 | 19.541 | 1.00 | 0.00 |
| ATOM | 2207 | 2HD2 | LEU | A | 175 | 57.281 | 53.951 | 18.012 | 1.00 | 0.00 |
| ATOM | 2208 | 3HD2 | LEU | A | 175 | 56.402 | 53.724 | 19.543 | 1.00 | 0.00 |
| ATOM | 2209 | N    | ASP | A | 176 | 55.175 | 48.844 | 18.535 | 1.00 | 0.00 |
| ATOM | 2210 | CA   | ASP | A | 176 | 54.434 | 47.833 | 17.771 | 1.00 | 0.00 |
| ATOM | 2211 | C    | ASP | A | 176 | 52.946 | 47.803 | 18.108 | 1.00 | 0.00 |
| ATOM | 2212 | O    | ASP | A | 176 | 52.108 | 47.554 | 17.236 | 1.00 | 0.00 |
| ATOM | 2213 | CB   | ASP | A | 176 | 55.039 | 46.447 | 18.006 | 1.00 | 0.00 |
| ATOM | 2214 | CG   | ASP | A | 176 | 56.294 | 46.162 | 17.192 | 1.00 | 0.00 |
| ATOM | 2215 | OD1  | ASP | A | 176 | 56.474 | 46.790 | 16.175 | 1.00 | 0.00 |
| ATOM | 2216 | OD2  | ASP | A | 176 | 57.136 | 45.439 | 17.669 | 1.00 | 0.00 |
| ATOM | 2217 | H    | ASP | A | 176 | 55.854 | 48.543 | 19.220 | 1.00 | 0.00 |
| ATOM | 2218 | HA   | ASP | A | 176 | 54.486 | 48.063 | 16.706 | 1.00 | 0.00 |
| ATOM | 2219 | 1HB  | ASP | A | 176 | 55.232 | 46.230 | 19.057 | 1.00 | 0.00 |
| ATOM | 2220 | 2HB  | ASP | A | 176 | 54.224 | 45.818 | 17.648 | 1.00 | 0.00 |
| ATOM | 2221 | N    | LEU | A | 177 | 52.622 | 48.036 | 19.375 | 1.00 | 0.00 |
| ATOM | 2222 | CA   | LEU | A | 177 | 51.233 | 48.047 | 19.798 | 1.00 | 0.00 |
| ATOM | 2223 | C    | LEU | A | 177 | 50.541 | 49.324 | 19.316 | 1.00 | 0.00 |
| ATOM | 2224 | O    | LEU | A | 177 | 49.340 | 49.317 | 19.057 | 1.00 | 0.00 |
| ATOM | 2225 | CB   | LEU | A | 177 | 51.141 | 47.921 | 21.324 | 1.00 | 0.00 |
| ATOM | 2226 | CG   | LEU | A | 177 | 49.721 | 47.765 | 21.882 | 1.00 | 0.00 |
| ATOM | 2227 | CD1  | LEU | A | 177 | 49.070 | 46.513 | 21.310 | 1.00 | 0.00 |
| ATOM | 2228 | CD2  | LEU | A | 177 | 49.775 | 47.699 | 23.401 | 1.00 | 0.00 |
| ATOM | 2229 | H    | LEU | A | 177 | 53.346 | 48.208 | 20.058 | 1.00 | 0.00 |
| ATOM | 2230 | HA   | LEU | A | 177 | 50.706 | 47.209 | 19.343 | 1.00 | 0.00 |
| ATOM | 2231 | 1HB  | LEU | A | 177 | 51.699 | 46.996 | 21.459 | 1.00 | 0.00 |
| ATOM | 2232 | 2HB  | LEU | A | 177 | 51.660 | 48.736 | 21.828 | 1.00 | 0.00 |
| ATOM | 2233 | HG   | LEU | A | 177 | 49.164 | 48.661 | 21.606 | 1.00 | 0.00 |
| ATOM | 2234 | 1HD1 | LEU | A | 177 | 48.062 | 46.410 | 21.711 | 1.00 | 0.00 |
| ATOM | 2235 | 2HD1 | LEU | A | 177 | 49.020 | 46.592 | 20.224 | 1.00 | 0.00 |
| ATOM | 2236 | 3HD1 | LEU | A | 177 | 49.660 | 45.639 | 21.584 | 1.00 | 0.00 |
| ATOM | 2237 | 1HD2 | LEU | A | 177 | 48.764 | 47.589 | 23.796 | 1.00 | 0.00 |
| ATOM | 2238 | 2HD2 | LEU | A | 177 | 50.380 | 46.845 | 23.707 | 1.00 | 0.00 |
| ATOM | 2239 | 3HD2 | LEU | A | 177 | 50.218 | 48.616 | 23.790 | 1.00 | 0.00 |
| ATOM | 2240 | N    | GLN | A | 178 | 51.294 | 50.416 | 19.194 | 1.00 | 0.00 |
| ATOM | 2241 | CA   | GLN | A | 178 | 50.735 | 51.676 | 18.706 | 1.00 | 0.00 |
| ATOM | 2242 | C    | GLN | A | 178 | 50.336 | 51.461 | 17.244 | 1.00 | 0.00 |
| ATOM | 2243 | O    | GLN | A | 178 | 49.221 | 51.797 | 16.831 | 1.00 | 0.00 |
| ATOM | 2244 | CB   | GLN | A | 178 | 51.741 | 52.823 | 18.830 | 1.00 | 0.00 |
| ATOM | 2245 | CG   | GLN | A | 178 | 51.209 | 54.170 | 18.372 | 1.00 | 0.00 |
| ATOM | 2246 | CD   | GLN | A | 178 | 52.230 | 55.281 | 18.533 | 1.00 | 0.00 |
| ATOM | 2247 | OE1  | GLN | A | 178 | 53.381 | 55.036 | 18.906 | 1.00 | 0.00 |
| ATOM | 2248 | NE2  | GLN | A | 178 | 51.813 | 56.511 | 18.256 | 1.00 | 0.00 |
| ATOM | 2249 | H    | GLN | A | 178 | 52.272 | 50.375 | 19.443 | 1.00 | 0.00 |
| ATOM | 2250 | HA   | GLN | A | 178 | 49.845 | 51.928 | 19.282 | 1.00 | 0.00 |
| ATOM | 2251 | 1HB  | GLN | A | 178 | 52.029 | 52.877 | 19.880 | 1.00 | 0.00 |
| ATOM | 2252 | 2HB  | GLN | A | 178 | 52.609 | 52.547 | 18.231 | 1.00 | 0.00 |
| ATOM | 2253 | 1HG  | GLN | A | 178 | 50.709 | 54.312 | 17.415 | 1.00 | 0.00 |
| ATOM | 2254 | 2HG  | GLN | A | 178 | 50.479 | 54.254 | 19.178 | 1.00 | 0.00 |
| ATOM | 2255 | 1HE2 | GLN | A | 178 | 52.442 | 57.285 | 18.344 | 1.00 | 0.00 |
| ATOM | 2256 | 2HE2 | GLN | A | 178 | 50.871 | 56.665 | 17.958 | 1.00 | 0.00 |
| ATOM | 2257 | N    | GLU | A | 179 | 51.276 | 50.916 | 16.469 | 1.00 | 0.00 |
| ATOM | 2258 | CA   | GLU | A | 179 | 51.075 | 50.637 | 15.052 | 1.00 | 0.00 |
| ATOM | 2259 | C    | GLU | A | 179 | 49.793 | 49.849 | 14.816 | 1.00 | 0.00 |
| ATOM | 2260 | O    | GLU | A | 179 | 48.936 | 50.275 | 14.041 | 1.00 | 0.00 |
| ATOM | 2261 | CB   | GLU | A | 179 | 52.272 | 49.873 | 14.483 | 1.00 | 0.00 |
| ATOM | 2262 | CG   | GLU | A | 179 | 53.536 | 50.707 | 14.329 | 1.00 | 0.00 |
| ATOM | 2263 | CD   | GLU | A | 179 | 54.668 | 49.888 | 13.776 | 1.00 | 0.00 |
| ATOM | 2264 | OE1  | GLU | A | 179 | 54.492 | 48.705 | 13.604 | 1.00 | 0.00 |

PEDF\_P1\_final\_docking\_model.txt

|      |      |      |     |   |     |        |        |        |      |      |
|------|------|------|-----|---|-----|--------|--------|--------|------|------|
| ATOM | 2265 | OE2  | GLU | A | 179 | 55.670 | 50.461 | 13.418 | 1.00 | 0.00 |
| ATOM | 2266 | H    | GLU | A | 179 | 52.164 | 50.690 | 16.894 | 1.00 | 0.00 |
| ATOM | 2267 | HA   | GLU | A | 179 | 50.966 | 51.573 | 14.503 | 1.00 | 0.00 |
| ATOM | 2268 | 1HB  | GLU | A | 179 | 52.469 | 49.040 | 15.159 | 1.00 | 0.00 |
| ATOM | 2269 | 2HB  | GLU | A | 179 | 51.971 | 49.487 | 13.509 | 1.00 | 0.00 |
| ATOM | 2270 | 1HG  | GLU | A | 179 | 53.396 | 51.595 | 13.713 | 1.00 | 0.00 |
| ATOM | 2271 | 2HG  | GLU | A | 179 | 53.770 | 51.008 | 15.349 | 1.00 | 0.00 |
| ATOM | 2272 | N    | ILE | A | 180 | 49.659 | 48.703 | 15.479 | 1.00 | 0.00 |
| ATOM | 2273 | CA   | ILE | A | 180 | 48.467 | 47.884 | 15.315 | 1.00 | 0.00 |
| ATOM | 2274 | C    | ILE | A | 180 | 47.186 | 48.675 | 15.602 | 1.00 | 0.00 |
| ATOM | 2275 | O    | ILE | A | 180 | 46.281 | 48.714 | 14.766 | 1.00 | 0.00 |
| ATOM | 2276 | CB   | ILE | A | 180 | 48.512 | 46.648 | 16.231 | 1.00 | 0.00 |
| ATOM | 2277 | CG1  | ILE | A | 180 | 49.624 | 45.694 | 15.787 | 1.00 | 0.00 |
| ATOM | 2278 | CG2  | ILE | A | 180 | 47.167 | 45.938 | 16.233 | 1.00 | 0.00 |
| ATOM | 2279 | CD1  | ILE | A | 180 | 49.922 | 44.597 | 16.783 | 1.00 | 0.00 |
| ATOM | 2280 | H    | ILE | A | 180 | 50.388 | 48.391 | 16.105 | 1.00 | 0.00 |
| ATOM | 2281 | HA   | ILE | A | 180 | 48.358 | 47.568 | 14.278 | 1.00 | 0.00 |
| ATOM | 2282 | HB   | ILE | A | 180 | 48.757 | 46.965 | 17.244 | 1.00 | 0.00 |
| ATOM | 2283 | 1HG1 | ILE | A | 180 | 49.313 | 45.251 | 14.841 | 1.00 | 0.00 |
| ATOM | 2284 | 2HG1 | ILE | A | 180 | 50.521 | 46.293 | 15.628 | 1.00 | 0.00 |
| ATOM | 2285 | 1HG2 | ILE | A | 180 | 47.216 | 45.066 | 16.885 | 1.00 | 0.00 |
| ATOM | 2286 | 2HG2 | ILE | A | 180 | 46.397 | 46.618 | 16.596 | 1.00 | 0.00 |
| ATOM | 2287 | 3HG2 | ILE | A | 180 | 46.922 | 45.619 | 15.220 | 1.00 | 0.00 |
| ATOM | 2288 | 1HD1 | ILE | A | 180 | 50.721 | 43.962 | 16.398 | 1.00 | 0.00 |
| ATOM | 2289 | 2HD1 | ILE | A | 180 | 50.235 | 45.039 | 17.730 | 1.00 | 0.00 |
| ATOM | 2290 | 3HD1 | ILE | A | 180 | 49.028 | 43.996 | 16.942 | 1.00 | 0.00 |
| ATOM | 2291 | N    | ASN | A | 181 | 47.114 | 49.313 | 16.770 | 1.00 | 0.00 |
| ATOM | 2292 | CA   | ASN | A | 181 | 45.937 | 50.105 | 17.141 | 1.00 | 0.00 |
| ATOM | 2293 | C    | ASN | A | 181 | 45.595 | 51.202 | 16.143 | 1.00 | 0.00 |
| ATOM | 2294 | O    | ASN | A | 181 | 44.425 | 51.492 | 15.920 | 1.00 | 0.00 |
| ATOM | 2295 | CB   | ASN | A | 181 | 46.109 | 50.715 | 18.520 | 1.00 | 0.00 |
| ATOM | 2296 | CG   | ASN | A | 181 | 45.992 | 49.720 | 19.641 | 1.00 | 0.00 |
| ATOM | 2297 | OD1  | ASN | A | 181 | 45.452 | 48.621 | 19.469 | 1.00 | 0.00 |
| ATOM | 2298 | ND2  | ASN | A | 181 | 46.422 | 50.129 | 20.807 | 1.00 | 0.00 |
| ATOM | 2299 | H    | ASN | A | 181 | 47.888 | 49.250 | 17.416 | 1.00 | 0.00 |
| ATOM | 2300 | HA   | ASN | A | 181 | 45.054 | 49.465 | 17.167 | 1.00 | 0.00 |
| ATOM | 2301 | 1HB  | ASN | A | 181 | 46.936 | 51.395 | 18.730 | 1.00 | 0.00 |
| ATOM | 2302 | 2HB  | ASN | A | 181 | 45.181 | 51.282 | 18.455 | 1.00 | 0.00 |
| ATOM | 2303 | 1HD2 | ASN | A | 181 | 46.375 | 49.520 | 21.599 | 1.00 | 0.00 |
| ATOM | 2304 | 2HD2 | ASN | A | 181 | 46.796 | 51.051 | 20.906 | 1.00 | 0.00 |
| ATOM | 2305 | N    | ASN | A | 182 | 46.602 | 51.832 | 15.557 | 1.00 | 0.00 |
| ATOM | 2306 | CA   | ASN | A | 182 | 46.319 | 52.868 | 14.581 | 1.00 | 0.00 |
| ATOM | 2307 | C    | ASN | A | 182 | 45.770 | 52.215 | 13.321 | 1.00 | 0.00 |
| ATOM | 2308 | O    | ASN | A | 182 | 44.932 | 52.792 | 12.627 | 1.00 | 0.00 |
| ATOM | 2309 | CB   | ASN | A | 182 | 47.544 | 53.707 | 14.268 | 1.00 | 0.00 |
| ATOM | 2310 | CG   | ASN | A | 182 | 47.939 | 54.640 | 15.379 | 1.00 | 0.00 |
| ATOM | 2311 | OD1  | ASN | A | 182 | 47.129 | 54.980 | 16.249 | 1.00 | 0.00 |
| ATOM | 2312 | ND2  | ASN | A | 182 | 49.155 | 55.119 | 15.308 | 1.00 | 0.00 |
| ATOM | 2313 | H    | ASN | A | 182 | 47.563 | 51.609 | 15.773 | 1.00 | 0.00 |
| ATOM | 2314 | HA   | ASN | A | 182 | 45.556 | 53.544 | 14.970 | 1.00 | 0.00 |
| ATOM | 2315 | 1HB  | ASN | A | 182 | 48.441 | 53.250 | 13.848 | 1.00 | 0.00 |
| ATOM | 2316 | 2HB  | ASN | A | 182 | 47.033 | 54.280 | 13.494 | 1.00 | 0.00 |
| ATOM | 2317 | 1HD2 | ASN | A | 182 | 49.486 | 55.746 | 16.014 | 1.00 | 0.00 |
| ATOM | 2318 | 2HD2 | ASN | A | 182 | 49.752 | 54.858 | 14.550 | 1.00 | 0.00 |
| ATOM | 2319 | N    | TRP | A | 183 | 46.233 | 50.998 | 13.045 | 1.00 | 0.00 |
| ATOM | 2320 | CA   | TRP | A | 183 | 45.786 | 50.243 | 11.877 | 1.00 | 0.00 |
| ATOM | 2321 | C    | TRP | A | 183 | 44.315 | 49.809 | 12.016 | 1.00 | 0.00 |
| ATOM | 2322 | O    | TRP | A | 183 | 43.505 | 50.044 | 11.122 | 1.00 | 0.00 |
| ATOM | 2323 | CB   | TRP | A | 183 | 46.681 | 49.041 | 11.582 | 1.00 | 0.00 |
| ATOM | 2324 | CG   | TRP | A | 183 | 46.270 | 48.438 | 10.259 | 1.00 | 0.00 |
| ATOM | 2325 | CD1  | TRP | A | 183 | 46.674 | 48.858 | 8.984  | 1.00 | 0.00 |
| ATOM | 2326 | CD2  | TRP | A | 183 | 45.377 | 47.328 | 10.023 | 1.00 | 0.00 |
| ATOM | 2327 | NE1  | TRP | A | 183 | 46.100 | 48.093 | 8.016  | 1.00 | 0.00 |

PEDF\_P1\_final\_docking\_model.txt

|      |      |      |     |   |     |        |        |        |      |      |
|------|------|------|-----|---|-----|--------|--------|--------|------|------|
| ATOM | 2328 | CE2  | TRP | A | 183 | 45.294 | 47.137 | 8.625  | 1.00 | 0.00 |
| ATOM | 2329 | CE3  | TRP | A | 183 | 44.660 | 46.496 | 10.873 | 1.00 | 0.00 |
| ATOM | 2330 | CZ2  | TRP | A | 183 | 44.492 | 46.122 | 8.117  | 1.00 | 0.00 |
| ATOM | 2331 | CZ3  | TRP | A | 183 | 43.862 | 45.485 | 10.354 | 1.00 | 0.00 |
| ATOM | 2332 | CH2  | TRP | A | 183 | 43.781 | 45.298 | 8.980  | 1.00 | 0.00 |
| ATOM | 2333 | H    | TRP | A | 183 | 46.915 | 50.586 | 13.665 | 1.00 | 0.00 |
| ATOM | 2334 | HA   | TRP | A | 183 | 45.838 | 50.872 | 10.988 | 1.00 | 0.00 |
| ATOM | 2335 | 1HB  | TRP | A | 183 | 47.724 | 49.353 | 11.522 | 1.00 | 0.00 |
| ATOM | 2336 | 2HB  | TRP | A | 183 | 46.571 | 48.290 | 12.364 | 1.00 | 0.00 |
| ATOM | 2337 | HD1  | TRP | A | 183 | 47.361 | 49.701 | 8.938  | 1.00 | 0.00 |
| ATOM | 2338 | HE1  | TRP | A | 183 | 46.237 | 48.202 | 7.021  | 1.00 | 0.00 |
| ATOM | 2339 | HE3  | TRP | A | 183 | 44.707 | 46.612 | 11.955 | 1.00 | 0.00 |
| ATOM | 2340 | HZ2  | TRP | A | 183 | 44.435 | 45.987 | 7.037  | 1.00 | 0.00 |
| ATOM | 2341 | HZ3  | TRP | A | 183 | 43.303 | 44.845 | 11.037 | 1.00 | 0.00 |
| ATOM | 2342 | HH2  | TRP | A | 183 | 43.158 | 44.503 | 8.569  | 1.00 | 0.00 |
| ATOM | 2343 | N    | VAL | A | 184 | 43.967 | 49.172 | 13.133 | 1.00 | 0.00 |
| ATOM | 2344 | CA   | VAL | A | 184 | 42.587 | 48.744 | 13.330 | 1.00 | 0.00 |
| ATOM | 2345 | C    | VAL | A | 184 | 41.736 | 49.955 | 13.648 | 1.00 | 0.00 |
| ATOM | 2346 | O    | VAL | A | 184 | 40.558 | 49.821 | 13.972 | 1.00 | 0.00 |
| ATOM | 2347 | CB   | VAL | A | 184 | 42.499 | 47.745 | 14.486 | 1.00 | 0.00 |
| ATOM | 2348 | CG1  | VAL | A | 184 | 43.445 | 46.577 | 14.246 | 1.00 | 0.00 |
| ATOM | 2349 | CG2  | VAL | A | 184 | 42.775 | 48.407 | 15.839 | 1.00 | 0.00 |
| ATOM | 2350 | H    | VAL | A | 184 | 44.649 | 48.979 | 13.852 | 1.00 | 0.00 |
| ATOM | 2351 | HA   | VAL | A | 184 | 42.173 | 48.308 | 12.420 | 1.00 | 0.00 |
| ATOM | 2352 | HB   | VAL | A | 184 | 41.482 | 47.355 | 14.541 | 1.00 | 0.00 |
| ATOM | 2353 | 1HG1 | VAL | A | 184 | 43.372 | 45.873 | 15.076 | 1.00 | 0.00 |
| ATOM | 2354 | 2HG1 | VAL | A | 184 | 43.173 | 46.073 | 13.319 | 1.00 | 0.00 |
| ATOM | 2355 | 3HG1 | VAL | A | 184 | 44.468 | 46.946 | 14.173 | 1.00 | 0.00 |
| ATOM | 2356 | 1HG2 | VAL | A | 184 | 42.701 | 47.662 | 16.631 | 1.00 | 0.00 |
| ATOM | 2357 | 2HG2 | VAL | A | 184 | 43.777 | 48.836 | 15.835 | 1.00 | 0.00 |
| ATOM | 2358 | 3HG2 | VAL | A | 184 | 42.043 | 49.196 | 16.015 | 1.00 | 0.00 |
| ATOM | 2359 | N    | GLN | A | 185 | 42.339 | 51.138 | 13.577 | 1.00 | 0.00 |
| ATOM | 2360 | CA   | GLN | A | 185 | 41.602 | 52.362 | 13.847 | 1.00 | 0.00 |
| ATOM | 2361 | C    | GLN | A | 185 | 41.220 | 52.979 | 12.520 | 1.00 | 0.00 |
| ATOM | 2362 | O    | GLN | A | 185 | 40.049 | 53.264 | 12.277 | 1.00 | 0.00 |
| ATOM | 2363 | CB   | GLN | A | 185 | 42.433 | 53.346 | 14.675 | 1.00 | 0.00 |
| ATOM | 2364 | CG   | GLN | A | 185 | 41.709 | 54.637 | 15.018 | 1.00 | 0.00 |
| ATOM | 2365 | CD   | GLN | A | 185 | 42.520 | 55.527 | 15.941 | 1.00 | 0.00 |
| ATOM | 2366 | OE1  | GLN | A | 185 | 43.623 | 55.168 | 16.362 | 1.00 | 0.00 |
| ATOM | 2367 | NE2  | GLN | A | 185 | 41.975 | 56.694 | 16.264 | 1.00 | 0.00 |
| ATOM | 2368 | H    | GLN | A | 185 | 43.318 | 51.196 | 13.334 | 1.00 | 0.00 |
| ATOM | 2369 | HA   | GLN | A | 185 | 40.690 | 52.126 | 14.396 | 1.00 | 0.00 |
| ATOM | 2370 | 1HB  | GLN | A | 185 | 42.716 | 52.827 | 15.590 | 1.00 | 0.00 |
| ATOM | 2371 | 2HB  | GLN | A | 185 | 43.328 | 53.569 | 14.093 | 1.00 | 0.00 |
| ATOM | 2372 | 1HG  | GLN | A | 185 | 41.246 | 55.272 | 14.263 | 1.00 | 0.00 |
| ATOM | 2373 | 2HG  | GLN | A | 185 | 40.932 | 54.147 | 15.606 | 1.00 | 0.00 |
| ATOM | 2374 | 1HE2 | GLN | A | 185 | 42.463 | 57.324 | 16.870 | 1.00 | 0.00 |
| ATOM | 2375 | 2HE2 | GLN | A | 185 | 41.078 | 56.946 | 15.902 | 1.00 | 0.00 |
| ATOM | 2376 | N    | ALA | A | 186 | 42.214 | 53.182 | 11.660 | 1.00 | 0.00 |
| ATOM | 2377 | CA   | ALA | A | 186 | 41.965 | 53.742 | 10.337 | 1.00 | 0.00 |
| ATOM | 2378 | C    | ALA | A | 186 | 40.972 | 52.818 | 9.630  | 1.00 | 0.00 |
| ATOM | 2379 | O    | ALA | A | 186 | 40.074 | 53.272 | 8.921  | 1.00 | 0.00 |
| ATOM | 2380 | CB   | ALA | A | 186 | 43.259 | 53.795 | 9.525  | 1.00 | 0.00 |
| ATOM | 2381 | H    | ALA | A | 186 | 43.160 | 52.945 | 11.924 | 1.00 | 0.00 |
| ATOM | 2382 | HA   | ALA | A | 186 | 41.525 | 54.733 | 10.454 | 1.00 | 0.00 |
| ATOM | 2383 | 1HB  | ALA | A | 186 | 43.053 | 54.216 | 8.541  | 1.00 | 0.00 |
| ATOM | 2384 | 2HB  | ALA | A | 186 | 43.988 | 54.420 | 10.041 | 1.00 | 0.00 |
| ATOM | 2385 | 3HB  | ALA | A | 186 | 43.659 | 52.789 | 9.412  | 1.00 | 0.00 |
| ATOM | 2386 | N    | GLN | A | 187 | 41.142 | 51.519 | 9.863  | 1.00 | 0.00 |
| ATOM | 2387 | CA   | GLN | A | 187 | 40.308 | 50.480 | 9.279  | 1.00 | 0.00 |
| ATOM | 2388 | C    | GLN | A | 187 | 38.869 | 50.539 | 9.755  | 1.00 | 0.00 |
| ATOM | 2389 | O    | GLN | A | 187 | 37.938 | 50.649 | 8.956  | 1.00 | 0.00 |
| ATOM | 2390 | CB   | GLN | A | 187 | 40.889 | 49.100 | 9.599  | 1.00 | 0.00 |

PEDF\_P1\_final\_docking\_model.txt

|      |      |      |     |   |     |        |        |        |      |      |
|------|------|------|-----|---|-----|--------|--------|--------|------|------|
| ATOM | 2391 | CG   | GLN | A | 187 | 42.185 | 48.787 | 8.872  | 1.00 | 0.00 |
| ATOM | 2392 | CD   | GLN | A | 187 | 42.005 | 48.722 | 7.367  | 1.00 | 0.00 |
| ATOM | 2393 | OE1  | GLN | A | 187 | 41.075 | 48.083 | 6.867  | 1.00 | 0.00 |
| ATOM | 2394 | NE2  | GLN | A | 187 | 42.897 | 49.380 | 6.636  | 1.00 | 0.00 |
| ATOM | 2395 | H    | GLN | A | 187 | 41.896 | 51.255 | 10.481 | 1.00 | 0.00 |
| ATOM | 2396 | HA   | GLN | A | 187 | 40.262 | 50.613 | 8.198  | 1.00 | 0.00 |
| ATOM | 2397 | 1HB  | GLN | A | 187 | 41.052 | 49.069 | 10.676 | 1.00 | 0.00 |
| ATOM | 2398 | 2HB  | GLN | A | 187 | 40.128 | 48.368 | 9.326  | 1.00 | 0.00 |
| ATOM | 2399 | 1HG  | GLN | A | 187 | 43.117 | 49.314 | 9.075  | 1.00 | 0.00 |
| ATOM | 2400 | 2HG  | GLN | A | 187 | 42.256 | 47.768 | 9.255  | 1.00 | 0.00 |
| ATOM | 2401 | 1HE2 | GLN | A | 187 | 42.829 | 49.373 | 5.638  | 1.00 | 0.00 |
| ATOM | 2402 | 2HE2 | GLN | A | 187 | 43.636 | 49.884 | 7.083  | 1.00 | 0.00 |
| ATOM | 2403 | N    | MET | A | 188 | 38.694 | 50.453 | 11.067 | 1.00 | 0.00 |
| ATOM | 2404 | CA   | MET | A | 188 | 37.366 | 50.481 | 11.657 | 1.00 | 0.00 |
| ATOM | 2405 | C    | MET | A | 188 | 36.811 | 51.895 | 11.836 | 1.00 | 0.00 |
| ATOM | 2406 | O    | MET | A | 188 | 35.849 | 52.103 | 12.581 | 1.00 | 0.00 |
| ATOM | 2407 | CB   | MET | A | 188 | 37.393 | 49.760 | 13.003 | 1.00 | 0.00 |
| ATOM | 2408 | CG   | MET | A | 188 | 37.681 | 48.268 | 12.913 | 1.00 | 0.00 |
| ATOM | 2409 | SD   | MET | A | 188 | 36.363 | 47.355 | 12.085 | 1.00 | 0.00 |
| ATOM | 2410 | CE   | MET | A | 188 | 37.062 | 47.162 | 10.448 | 1.00 | 0.00 |
| ATOM | 2411 | H    | MET | A | 188 | 39.499 | 50.366 | 11.671 | 1.00 | 0.00 |
| ATOM | 2412 | HA   | MET | A | 188 | 36.657 | 49.979 | 10.999 | 1.00 | 0.00 |
| ATOM | 2413 | 1HB  | MET | A | 188 | 38.162 | 50.242 | 13.606 | 1.00 | 0.00 |
| ATOM | 2414 | 2HB  | MET | A | 188 | 36.418 | 49.914 | 13.466 | 1.00 | 0.00 |
| ATOM | 2415 | 1HG  | MET | A | 188 | 38.611 | 48.134 | 12.360 | 1.00 | 0.00 |
| ATOM | 2416 | 2HG  | MET | A | 188 | 37.801 | 47.884 | 13.925 | 1.00 | 0.00 |
| ATOM | 2417 | 1HE  | MET | A | 188 | 36.363 | 46.614 | 9.816  | 1.00 | 0.00 |
| ATOM | 2418 | 2HE  | MET | A | 188 | 37.251 | 48.145 | 10.015 | 1.00 | 0.00 |
| ATOM | 2419 | 3HE  | MET | A | 188 | 38.000 | 46.609 | 10.516 | 1.00 | 0.00 |
| ATOM | 2420 | N    | LYS | A | 189 | 37.406 | 52.857 | 11.133 | 1.00 | 0.00 |
| ATOM | 2421 | CA   | LYS | A | 189 | 36.991 | 54.253 | 11.231 | 1.00 | 0.00 |
| ATOM | 2422 | C    | LYS | A | 189 | 36.778 | 54.632 | 12.684 | 1.00 | 0.00 |
| ATOM | 2423 | O    | LYS | A | 189 | 35.858 | 55.381 | 13.011 | 1.00 | 0.00 |
| ATOM | 2424 | CB   | LYS | A | 189 | 35.715 | 54.502 | 10.426 | 1.00 | 0.00 |
| ATOM | 2425 | CG   | LYS | A | 189 | 35.820 | 54.138 | 8.951  | 1.00 | 0.00 |
| ATOM | 2426 | CD   | LYS | A | 189 | 36.832 | 55.020 | 8.234  | 1.00 | 0.00 |
| ATOM | 2427 | CE   | LYS | A | 189 | 36.910 | 54.683 | 6.753  | 1.00 | 0.00 |
| ATOM | 2428 | NZ   | LYS | A | 189 | 37.983 | 55.449 | 6.063  | 1.00 | 0.00 |
| ATOM | 2429 | H    | LYS | A | 189 | 38.166 | 52.612 | 10.515 | 1.00 | 0.00 |
| ATOM | 2430 | HA   | LYS | A | 189 | 37.776 | 54.900 | 10.839 | 1.00 | 0.00 |
| ATOM | 2431 | 1HB  | LYS | A | 189 | 34.924 | 53.911 | 10.890 | 1.00 | 0.00 |
| ATOM | 2432 | 2HB  | LYS | A | 189 | 35.477 | 55.562 | 10.521 | 1.00 | 0.00 |
| ATOM | 2433 | 1HG  | LYS | A | 189 | 36.127 | 53.094 | 8.873  | 1.00 | 0.00 |
| ATOM | 2434 | 2HG  | LYS | A | 189 | 34.840 | 54.263 | 8.492  | 1.00 | 0.00 |
| ATOM | 2435 | 1HD  | LYS | A | 189 | 36.532 | 56.062 | 8.356  | 1.00 | 0.00 |
| ATOM | 2436 | 2HD  | LYS | A | 189 | 37.810 | 54.869 | 8.692  | 1.00 | 0.00 |
| ATOM | 2437 | 1HE  | LYS | A | 189 | 37.106 | 53.616 | 6.655  | 1.00 | 0.00 |
| ATOM | 2438 | 2HE  | LYS | A | 189 | 35.948 | 54.918 | 6.298  | 1.00 | 0.00 |
| ATOM | 2439 | 1HZ  | LYS | A | 189 | 38.001 | 55.198 | 5.085  | 1.00 | 0.00 |
| ATOM | 2440 | 2HZ  | LYS | A | 189 | 37.801 | 56.439 | 6.153  | 1.00 | 0.00 |
| ATOM | 2441 | 3HZ  | LYS | A | 189 | 38.875 | 55.231 | 6.484  | 1.00 | 0.00 |
| ATOM | 2442 | N    | GLY | A | 190 | 37.632 | 54.092 | 13.550 | 1.00 | 0.00 |
| ATOM | 2443 | CA   | GLY | A | 190 | 37.552 | 54.370 | 14.972 | 1.00 | 0.00 |
| ATOM | 2444 | C    | GLY | A | 190 | 36.262 | 53.956 | 15.659 | 1.00 | 0.00 |
| ATOM | 2445 | O    | GLY | A | 190 | 35.708 | 54.732 | 16.431 | 1.00 | 0.00 |
| ATOM | 2446 | H    | GLY | A | 190 | 38.354 | 53.473 | 13.210 | 1.00 | 0.00 |
| ATOM | 2447 | 1HA  | GLY | A | 190 | 38.359 | 53.845 | 15.484 | 1.00 | 0.00 |
| ATOM | 2448 | 2HA  | GLY | A | 190 | 37.659 | 55.442 | 15.132 | 1.00 | 0.00 |
| ATOM | 2449 | N    | LYS | A | 191 | 35.781 | 52.742 | 15.395 | 1.00 | 0.00 |
| ATOM | 2450 | CA   | LYS | A | 191 | 34.553 | 52.254 | 16.023 | 1.00 | 0.00 |
| ATOM | 2451 | C    | LYS | A | 191 | 34.835 | 51.041 | 16.921 | 1.00 | 0.00 |
| ATOM | 2452 | O    | LYS | A | 191 | 33.916 | 50.385 | 17.419 | 1.00 | 0.00 |
| ATOM | 2453 | CB   | LYS | A | 191 | 33.516 | 51.894 | 14.958 | 1.00 | 0.00 |

PEDF\_P1\_final\_docking\_model.txt

|      |      |      |     |   |     |        |        |        |      |      |
|------|------|------|-----|---|-----|--------|--------|--------|------|------|
| ATOM | 2454 | CG   | LYS | A | 191 | 33.127 | 53.047 | 14.043 | 1.00 | 0.00 |
| ATOM | 2455 | CD   | LYS | A | 191 | 32.436 | 54.160 | 14.817 | 1.00 | 0.00 |
| ATOM | 2456 | CE   | LYS | A | 191 | 32.044 | 55.311 | 13.903 | 1.00 | 0.00 |
| ATOM | 2457 | NZ   | LYS | A | 191 | 31.411 | 56.428 | 14.655 | 1.00 | 0.00 |
| ATOM | 2458 | H    | LYS | A | 191 | 36.274 | 52.144 | 14.747 | 1.00 | 0.00 |
| ATOM | 2459 | HA   | LYS | A | 191 | 34.136 | 53.028 | 16.668 | 1.00 | 0.00 |
| ATOM | 2460 | 1HB  | LYS | A | 191 | 33.938 | 51.084 | 14.362 | 1.00 | 0.00 |
| ATOM | 2461 | 2HB  | LYS | A | 191 | 32.630 | 51.534 | 15.483 | 1.00 | 0.00 |
| ATOM | 2462 | 1HG  | LYS | A | 191 | 34.032 | 53.438 | 13.575 | 1.00 | 0.00 |
| ATOM | 2463 | 2HG  | LYS | A | 191 | 32.456 | 52.668 | 13.274 | 1.00 | 0.00 |
| ATOM | 2464 | 1HD  | LYS | A | 191 | 31.542 | 53.750 | 15.290 | 1.00 | 0.00 |
| ATOM | 2465 | 2HD  | LYS | A | 191 | 33.117 | 54.523 | 15.586 | 1.00 | 0.00 |
| ATOM | 2466 | 1HE  | LYS | A | 191 | 32.943 | 55.673 | 13.405 | 1.00 | 0.00 |
| ATOM | 2467 | 2HE  | LYS | A | 191 | 31.345 | 54.933 | 13.158 | 1.00 | 0.00 |
| ATOM | 2468 | 1HZ  | LYS | A | 191 | 31.166 | 57.170 | 14.014 | 1.00 | 0.00 |
| ATOM | 2469 | 2HZ  | LYS | A | 191 | 30.576 | 56.093 | 15.116 | 1.00 | 0.00 |
| ATOM | 2470 | 3HZ  | LYS | A | 191 | 32.059 | 56.780 | 15.345 | 1.00 | 0.00 |
| ATOM | 2471 | N    | LEU | A | 192 | 36.117 | 50.751 | 17.120 | 1.00 | 0.00 |
| ATOM | 2472 | CA   | LEU | A | 192 | 36.542 | 49.641 | 17.962 | 1.00 | 0.00 |
| ATOM | 2473 | C    | LEU | A | 192 | 37.522 | 50.150 | 19.008 | 1.00 | 0.00 |
| ATOM | 2474 | O    | LEU | A | 192 | 38.453 | 50.896 | 18.696 | 1.00 | 0.00 |
| ATOM | 2475 | CB   | LEU | A | 192 | 37.175 | 48.529 | 17.117 | 1.00 | 0.00 |
| ATOM | 2476 | CG   | LEU | A | 192 | 37.935 | 47.458 | 17.911 | 1.00 | 0.00 |
| ATOM | 2477 | CD1  | LEU | A | 192 | 36.952 | 46.508 | 18.579 | 1.00 | 0.00 |
| ATOM | 2478 | CD2  | LEU | A | 192 | 38.869 | 46.700 | 16.978 | 1.00 | 0.00 |
| ATOM | 2479 | H    | LEU | A | 192 | 36.817 | 51.323 | 16.670 | 1.00 | 0.00 |
| ATOM | 2480 | HA   | LEU | A | 192 | 35.680 | 49.231 | 18.488 | 1.00 | 0.00 |
| ATOM | 2481 | 1HB  | LEU | A | 192 | 36.273 | 48.101 | 16.682 | 1.00 | 0.00 |
| ATOM | 2482 | 2HB  | LEU | A | 192 | 37.804 | 48.933 | 16.324 | 1.00 | 0.00 |
| ATOM | 2483 | HG   | LEU | A | 192 | 38.549 | 47.976 | 18.648 | 1.00 | 0.00 |
| ATOM | 2484 | 1HD1 | LEU | A | 192 | 37.501 | 45.751 | 19.141 | 1.00 | 0.00 |
| ATOM | 2485 | 2HD1 | LEU | A | 192 | 36.310 | 47.067 | 19.259 | 1.00 | 0.00 |
| ATOM | 2486 | 3HD1 | LEU | A | 192 | 36.341 | 46.022 | 17.819 | 1.00 | 0.00 |
| ATOM | 2487 | 1HD2 | LEU | A | 192 | 39.409 | 45.940 | 17.544 | 1.00 | 0.00 |
| ATOM | 2488 | 2HD2 | LEU | A | 192 | 38.287 | 46.222 | 16.190 | 1.00 | 0.00 |
| ATOM | 2489 | 3HD2 | LEU | A | 192 | 39.581 | 47.395 | 16.532 | 1.00 | 0.00 |
| ATOM | 2490 | N    | ALA | A | 193 | 37.313 | 49.725 | 20.247 | 1.00 | 0.00 |
| ATOM | 2491 | CA   | ALA | A | 193 | 38.160 | 50.129 | 21.362 | 1.00 | 0.00 |
| ATOM | 2492 | C    | ALA | A | 193 | 39.641 | 49.826 | 21.134 | 1.00 | 0.00 |
| ATOM | 2493 | O    | ALA | A | 193 | 40.017 | 48.666 | 20.951 | 1.00 | 0.00 |
| ATOM | 2494 | CB   | ALA | A | 193 | 37.711 | 49.443 | 22.653 | 1.00 | 0.00 |
| ATOM | 2495 | H    | ALA | A | 193 | 36.539 | 49.100 | 20.419 | 1.00 | 0.00 |
| ATOM | 2496 | HA   | ALA | A | 193 | 38.088 | 51.210 | 21.482 | 1.00 | 0.00 |
| ATOM | 2497 | 1HB  | ALA | A | 193 | 38.355 | 49.757 | 23.474 | 1.00 | 0.00 |
| ATOM | 2498 | 2HB  | ALA | A | 193 | 36.680 | 49.721 | 22.874 | 1.00 | 0.00 |
| ATOM | 2499 | 3HB  | ALA | A | 193 | 37.778 | 48.363 | 22.533 | 1.00 | 0.00 |
| ATOM | 2500 | N    | ARG | A | 194 | 40.478 | 50.864 | 21.144 | 1.00 | 0.00 |
| ATOM | 2501 | CA   | ARG | A | 194 | 41.916 | 50.675 | 20.972 | 1.00 | 0.00 |
| ATOM | 2502 | C    | ARG | A | 194 | 42.370 | 49.704 | 22.065 | 1.00 | 0.00 |
| ATOM | 2503 | O    | ARG | A | 194 | 42.219 | 49.984 | 23.252 | 1.00 | 0.00 |
| ATOM | 2504 | CB   | ARG | A | 194 | 42.702 | 51.978 | 20.979 | 1.00 | 0.00 |
| ATOM | 2505 | CG   | ARG | A | 194 | 42.474 | 52.869 | 19.769 | 1.00 | 0.00 |
| ATOM | 2506 | CD   | ARG | A | 194 | 43.244 | 54.139 | 19.790 | 1.00 | 0.00 |
| ATOM | 2507 | NE   | ARG | A | 194 | 42.844 | 55.069 | 20.834 | 1.00 | 0.00 |
| ATOM | 2508 | CZ   | ARG | A | 194 | 43.525 | 56.182 | 21.170 | 1.00 | 0.00 |
| ATOM | 2509 | NH1  | ARG | A | 194 | 44.657 | 56.488 | 20.575 | 1.00 | 0.00 |
| ATOM | 2510 | NH2  | ARG | A | 194 | 43.038 | 56.946 | 22.131 | 1.00 | 0.00 |
| ATOM | 2511 | H    | ARG | A | 194 | 40.116 | 51.798 | 21.272 | 1.00 | 0.00 |
| ATOM | 2512 | HA   | ARG | A | 194 | 42.116 | 50.235 | 19.994 | 1.00 | 0.00 |
| ATOM | 2513 | 1HB  | ARG | A | 194 | 42.417 | 52.517 | 21.881 | 1.00 | 0.00 |
| ATOM | 2514 | 2HB  | ARG | A | 194 | 43.758 | 51.711 | 21.034 | 1.00 | 0.00 |
| ATOM | 2515 | 1HG  | ARG | A | 194 | 42.761 | 52.318 | 18.873 | 1.00 | 0.00 |
| ATOM | 2516 | 2HG  | ARG | A | 194 | 41.414 | 53.119 | 19.718 | 1.00 | 0.00 |



PEDF\_P1\_final\_docking\_model.txt

|      |      |      |     |   |     |        |        |        |      |      |
|------|------|------|-----|---|-----|--------|--------|--------|------|------|
| ATOM | 2517 | 1HD  | ARG | A | 194 | 44.299 | 53.911 | 19.942 | 1.00 | 0.00 |
| ATOM | 2518 | 2HD  | ARG | A | 194 | 43.116 | 54.646 | 18.835 | 1.00 | 0.00 |
| ATOM | 2519 | HE   | ARG | A | 194 | 42.040 | 55.043 | 21.447 | 1.00 | 0.00 |
| ATOM | 2520 | 1HH1 | ARG | A | 194 | 45.026 | 55.884 | 19.854 | 1.00 | 0.00 |
| ATOM | 2521 | 2HH1 | ARG | A | 194 | 45.152 | 57.327 | 20.841 | 1.00 | 0.00 |
| ATOM | 2522 | 1HH2 | ARG | A | 194 | 42.176 | 56.686 | 22.591 | 1.00 | 0.00 |
| ATOM | 2523 | 2HH2 | ARG | A | 194 | 43.528 | 57.785 | 22.403 | 1.00 | 0.00 |
| ATOM | 2524 | N    | SER | A | 195 | 42.914 | 48.562 | 21.657 | 1.00 | 0.00 |
| ATOM | 2525 | CA   | SER | A | 195 | 43.366 | 47.535 | 22.591 | 1.00 | 0.00 |
| ATOM | 2526 | C    | SER | A | 195 | 44.574 | 47.915 | 23.435 | 1.00 | 0.00 |
| ATOM | 2527 | O    | SER | A | 195 | 45.274 | 48.885 | 23.156 | 1.00 | 0.00 |
| ATOM | 2528 | CB   | SER | A | 195 | 43.671 | 46.265 | 21.820 | 1.00 | 0.00 |
| ATOM | 2529 | OG   | SER | A | 195 | 42.534 | 45.749 | 21.185 | 1.00 | 0.00 |
| ATOM | 2530 | H    | SER | A | 195 | 43.016 | 48.404 | 20.665 | 1.00 | 0.00 |
| ATOM | 2531 | HA   | SER | A | 195 | 42.587 | 47.202 | 23.278 | 1.00 | 0.00 |
| ATOM | 2532 | 1HB  | SER | A | 195 | 44.428 | 46.488 | 21.068 | 1.00 | 0.00 |
| ATOM | 2533 | 2HB  | SER | A | 195 | 44.059 | 45.520 | 22.514 | 1.00 | 0.00 |
| ATOM | 2534 | HG   | SER | A | 195 | 41.865 | 45.547 | 21.842 | 1.00 | 0.00 |
| ATOM | 2535 | N    | THR | A | 196 | 44.811 | 47.117 | 24.468 | 1.00 | 0.00 |
| ATOM | 2536 | CA   | THR | A | 196 | 45.923 | 47.331 | 25.382 | 1.00 | 0.00 |
| ATOM | 2537 | C    | THR | A | 196 | 46.253 | 46.024 | 26.103 | 1.00 | 0.00 |
| ATOM | 2538 | O    | THR | A | 196 | 46.258 | 45.958 | 27.334 | 1.00 | 0.00 |
| ATOM | 2539 | CB   | THR | A | 196 | 45.612 | 48.428 | 26.417 | 1.00 | 0.00 |
| ATOM | 2540 | OG1  | THR | A | 196 | 45.329 | 49.660 | 25.742 | 1.00 | 0.00 |
| ATOM | 2541 | CG2  | THR | A | 196 | 46.792 | 48.627 | 27.355 | 1.00 | 0.00 |
| ATOM | 2542 | H    | THR | A | 196 | 44.193 | 46.333 | 24.620 | 1.00 | 0.00 |
| ATOM | 2543 | HA   | THR | A | 196 | 46.810 | 47.627 | 24.821 | 1.00 | 0.00 |
| ATOM | 2544 | HB   | THR | A | 196 | 44.736 | 48.131 | 26.995 | 1.00 | 0.00 |
| ATOM | 2545 | HG1  | THR | A | 196 | 46.093 | 49.920 | 25.220 | 1.00 | 0.00 |
| ATOM | 2546 | 1HG2 | THR | A | 196 | 46.553 | 49.405 | 28.079 | 1.00 | 0.00 |
| ATOM | 2547 | 2HG2 | THR | A | 196 | 47.002 | 47.694 | 27.879 | 1.00 | 0.00 |
| ATOM | 2548 | 3HG2 | THR | A | 196 | 47.668 | 48.924 | 26.779 | 1.00 | 0.00 |
| ATOM | 2549 | N    | LYS | A | 197 | 46.523 | 44.982 | 25.322 | 1.00 | 0.00 |
| ATOM | 2550 | CA   | LYS | A | 197 | 46.844 | 43.671 | 25.873 | 1.00 | 0.00 |
| ATOM | 2551 | C    | LYS | A | 197 | 48.343 | 43.395 | 25.794 | 1.00 | 0.00 |
| ATOM | 2552 | O    | LYS | A | 197 | 48.843 | 42.454 | 26.417 | 1.00 | 0.00 |
| ATOM | 2553 | CB   | LYS | A | 197 | 46.066 | 42.577 | 25.140 | 1.00 | 0.00 |
| ATOM | 2554 | CG   | LYS | A | 197 | 44.553 | 42.728 | 25.207 | 1.00 | 0.00 |
| ATOM | 2555 | CD   | LYS | A | 197 | 44.050 | 42.633 | 26.640 | 1.00 | 0.00 |
| ATOM | 2556 | CE   | LYS | A | 197 | 42.531 | 42.697 | 26.700 | 1.00 | 0.00 |
| ATOM | 2557 | NZ   | LYS | A | 197 | 42.029 | 42.695 | 28.100 | 1.00 | 0.00 |
| ATOM | 2558 | H    | LYS | A | 197 | 46.505 | 45.103 | 24.319 | 1.00 | 0.00 |
| ATOM | 2559 | HA   | LYS | A | 197 | 46.576 | 43.639 | 26.930 | 1.00 | 0.00 |
| ATOM | 2560 | 1HB  | LYS | A | 197 | 46.387 | 42.601 | 24.098 | 1.00 | 0.00 |
| ATOM | 2561 | 2HB  | LYS | A | 197 | 46.355 | 41.625 | 25.586 | 1.00 | 0.00 |
| ATOM | 2562 | 1HG  | LYS | A | 197 | 44.283 | 43.700 | 24.790 | 1.00 | 0.00 |
| ATOM | 2563 | 2HG  | LYS | A | 197 | 44.099 | 41.939 | 24.609 | 1.00 | 0.00 |
| ATOM | 2564 | 1HD  | LYS | A | 197 | 44.392 | 41.689 | 27.066 | 1.00 | 0.00 |
| ATOM | 2565 | 2HD  | LYS | A | 197 | 44.470 | 43.461 | 27.211 | 1.00 | 0.00 |
| ATOM | 2566 | 1HE  | LYS | A | 197 | 42.207 | 43.608 | 26.199 | 1.00 | 0.00 |
| ATOM | 2567 | 2HE  | LYS | A | 197 | 42.132 | 41.832 | 26.170 | 1.00 | 0.00 |
| ATOM | 2568 | 1HZ  | LYS | A | 197 | 41.019 | 42.738 | 28.096 | 1.00 | 0.00 |
| ATOM | 2569 | 2HZ  | LYS | A | 197 | 42.328 | 41.849 | 28.565 | 1.00 | 0.00 |
| ATOM | 2570 | 3HZ  | LYS | A | 197 | 42.397 | 43.497 | 28.591 | 1.00 | 0.00 |
| ATOM | 2571 | N    | GLU | A | 198 | 49.051 | 44.222 | 25.029 | 1.00 | 0.00 |
| ATOM | 2572 | CA   | GLU | A | 198 | 50.495 | 44.081 | 24.859 | 1.00 | 0.00 |
| ATOM | 2573 | C    | GLU | A | 198 | 50.819 | 42.839 | 24.045 | 1.00 | 0.00 |
| ATOM | 2574 | O    | GLU | A | 198 | 50.637 | 41.712 | 24.507 | 1.00 | 0.00 |
| ATOM | 2575 | CB   | GLU | A | 198 | 51.197 | 44.019 | 26.217 | 1.00 | 0.00 |
| ATOM | 2576 | CG   | GLU | A | 198 | 51.131 | 45.312 | 27.018 | 1.00 | 0.00 |
| ATOM | 2577 | CD   | GLU | A | 198 | 51.858 | 45.180 | 28.328 | 1.00 | 0.00 |
| ATOM | 2578 | OE1  | GLU | A | 198 | 52.389 | 44.127 | 28.588 | 1.00 | 0.00 |
| ATOM | 2579 | OE2  | GLU | A | 198 | 51.979 | 46.165 | 29.018 | 1.00 | 0.00 |

PEDF\_P1\_final\_docking\_model.txt

|      |      |      |     |   |     |        |        |        |      |      |
|------|------|------|-----|---|-----|--------|--------|--------|------|------|
| ATOM | 2580 | H    | GLU | A | 198 | 48.570 | 44.971 | 24.552 | 1.00 | 0.00 |
| ATOM | 2581 | HA   | GLU | A | 198 | 50.887 | 44.935 | 24.305 | 1.00 | 0.00 |
| ATOM | 2582 | 1HB  | GLU | A | 198 | 50.725 | 43.217 | 26.784 | 1.00 | 0.00 |
| ATOM | 2583 | 2HB  | GLU | A | 198 | 52.240 | 43.764 | 26.026 | 1.00 | 0.00 |
| ATOM | 2584 | 1HG  | GLU | A | 198 | 51.513 | 46.177 | 26.478 | 1.00 | 0.00 |
| ATOM | 2585 | 2HG  | GLU | A | 198 | 50.067 | 45.443 | 27.206 | 1.00 | 0.00 |
| ATOM | 2586 | N    | ILE | A | 199 | 51.302 | 43.052 | 22.828 | 1.00 | 0.00 |
| ATOM | 2587 | CA   | ILE | A | 199 | 51.653 | 41.945 | 21.957 | 1.00 | 0.00 |
| ATOM | 2588 | C    | ILE | A | 199 | 52.517 | 40.939 | 22.704 | 1.00 | 0.00 |
| ATOM | 2589 | O    | ILE | A | 199 | 53.329 | 41.306 | 23.554 | 1.00 | 0.00 |
| ATOM | 2590 | CB   | ILE | A | 199 | 52.398 | 42.425 | 20.698 | 1.00 | 0.00 |
| ATOM | 2591 | CG1  | ILE | A | 199 | 53.687 | 43.154 | 21.086 | 1.00 | 0.00 |
| ATOM | 2592 | CG2  | ILE | A | 199 | 51.504 | 43.327 | 19.862 | 1.00 | 0.00 |
| ATOM | 2593 | CD1  | ILE | A | 199 | 54.583 | 43.478 | 19.912 | 1.00 | 0.00 |
| ATOM | 2594 | H    | ILE | A | 199 | 51.429 | 43.998 | 22.497 | 1.00 | 0.00 |
| ATOM | 2595 | HA   | ILE | A | 199 | 50.762 | 41.393 | 21.660 | 1.00 | 0.00 |
| ATOM | 2596 | HB   | ILE | A | 199 | 52.694 | 41.558 | 20.108 | 1.00 | 0.00 |
| ATOM | 2597 | 1HG1 | ILE | A | 199 | 53.399 | 44.077 | 21.589 | 1.00 | 0.00 |
| ATOM | 2598 | 2HG1 | ILE | A | 199 | 54.224 | 42.513 | 21.786 | 1.00 | 0.00 |
| ATOM | 2599 | 1HG2 | ILE | A | 199 | 52.046 | 43.658 | 18.977 | 1.00 | 0.00 |
| ATOM | 2600 | 2HG2 | ILE | A | 199 | 50.614 | 42.777 | 19.558 | 1.00 | 0.00 |
| ATOM | 2601 | 3HG2 | ILE | A | 199 | 51.209 | 44.195 | 20.452 | 1.00 | 0.00 |
| ATOM | 2602 | 1HD1 | ILE | A | 199 | 55.476 | 43.993 | 20.266 | 1.00 | 0.00 |
| ATOM | 2603 | 2HD1 | ILE | A | 199 | 54.873 | 42.554 | 19.409 | 1.00 | 0.00 |
| ATOM | 2604 | 3HD1 | ILE | A | 199 | 54.049 | 44.119 | 19.212 | 1.00 | 0.00 |
| ATOM | 2605 | N    | PRO | A | 200 | 52.336 | 39.647 | 22.403 | 1.00 | 0.00 |
| ATOM | 2606 | CA   | PRO | A | 200 | 53.093 | 38.560 | 23.035 | 1.00 | 0.00 |
| ATOM | 2607 | C    | PRO | A | 200 | 54.599 | 38.697 | 22.804 | 1.00 | 0.00 |
| ATOM | 2608 | O    | PRO | A | 200 | 55.037 | 39.198 | 21.764 | 1.00 | 0.00 |
| ATOM | 2609 | CB   | PRO | A | 200 | 52.529 | 37.292 | 22.387 | 1.00 | 0.00 |
| ATOM | 2610 | CG   | PRO | A | 200 | 51.165 | 37.683 | 21.930 | 1.00 | 0.00 |
| ATOM | 2611 | CD   | PRO | A | 200 | 51.291 | 39.113 | 21.477 | 1.00 | 0.00 |
| ATOM | 2612 | HA   | PRO | A | 200 | 52.984 | 38.546 | 24.130 | 1.00 | 0.00 |
| ATOM | 2613 | 1HB  | PRO | A | 200 | 53.152 | 36.960 | 21.543 | 1.00 | 0.00 |
| ATOM | 2614 | 2HB  | PRO | A | 200 | 52.485 | 36.458 | 23.103 | 1.00 | 0.00 |
| ATOM | 2615 | 1HG  | PRO | A | 200 | 50.820 | 37.037 | 21.109 | 1.00 | 0.00 |
| ATOM | 2616 | 2HG  | PRO | A | 200 | 50.431 | 37.589 | 22.744 | 1.00 | 0.00 |
| ATOM | 2617 | 1HD  | PRO | A | 200 | 51.594 | 39.191 | 20.422 | 1.00 | 0.00 |
| ATOM | 2618 | 2HD  | PRO | A | 200 | 50.346 | 39.667 | 21.581 | 1.00 | 0.00 |
| ATOM | 2619 | N    | ASP | A | 201 | 55.389 | 38.253 | 23.775 | 1.00 | 0.00 |
| ATOM | 2620 | CA   | ASP | A | 201 | 56.838 | 38.330 | 23.645 | 1.00 | 0.00 |
| ATOM | 2621 | C    | ASP | A | 201 | 57.265 | 37.473 | 22.453 | 1.00 | 0.00 |
| ATOM | 2622 | O    | ASP | A | 201 | 58.028 | 37.918 | 21.590 | 1.00 | 0.00 |
| ATOM | 2623 | CB   | ASP | A | 201 | 57.534 | 37.866 | 24.927 | 1.00 | 0.00 |
| ATOM | 2624 | CG   | ASP | A | 201 | 57.422 | 38.840 | 26.092 | 1.00 | 0.00 |
| ATOM | 2625 | OD1  | ASP | A | 201 | 57.024 | 39.959 | 25.869 | 1.00 | 0.00 |
| ATOM | 2626 | OD2  | ASP | A | 201 | 57.582 | 38.417 | 27.211 | 1.00 | 0.00 |
| ATOM | 2627 | H    | ASP | A | 201 | 54.991 | 37.857 | 24.614 | 1.00 | 0.00 |
| ATOM | 2628 | HA   | ASP | A | 201 | 57.137 | 39.360 | 23.447 | 1.00 | 0.00 |
| ATOM | 2629 | 1HB  | ASP | A | 201 | 57.225 | 36.873 | 25.254 | 1.00 | 0.00 |
| ATOM | 2630 | 2HB  | ASP | A | 201 | 58.568 | 37.831 | 24.582 | 1.00 | 0.00 |
| ATOM | 2631 | N    | GLU | A | 202 | 56.761 | 36.244 | 22.402 | 1.00 | 0.00 |
| ATOM | 2632 | CA   | GLU | A | 202 | 57.094 | 35.340 | 21.311 | 1.00 | 0.00 |
| ATOM | 2633 | C    | GLU | A | 202 | 56.030 | 35.429 | 20.214 | 1.00 | 0.00 |
| ATOM | 2634 | O    | GLU | A | 202 | 54.861 | 35.108 | 20.447 | 1.00 | 0.00 |
| ATOM | 2635 | CB   | GLU | A | 202 | 57.222 | 33.902 | 21.820 | 1.00 | 0.00 |
| ATOM | 2636 | CG   | GLU | A | 202 | 57.590 | 32.886 | 20.748 | 1.00 | 0.00 |
| ATOM | 2637 | CD   | GLU | A | 202 | 57.711 | 31.503 | 21.325 | 1.00 | 0.00 |
| ATOM | 2638 | OE1  | GLU | A | 202 | 57.500 | 31.352 | 22.504 | 1.00 | 0.00 |
| ATOM | 2639 | OE2  | GLU | A | 202 | 57.903 | 30.581 | 20.568 | 1.00 | 0.00 |
| ATOM | 2640 | H    | GLU | A | 202 | 56.136 | 35.928 | 23.130 | 1.00 | 0.00 |
| ATOM | 2641 | HA   | GLU | A | 202 | 58.044 | 35.635 | 20.863 | 1.00 | 0.00 |
| ATOM | 2642 | 1HB  | GLU | A | 202 | 57.989 | 33.906 | 22.594 | 1.00 | 0.00 |

PEDF\_P1\_final\_docking\_model.txt

|      |      |      |     |   |     |        |        |        |      |      |
|------|------|------|-----|---|-----|--------|--------|--------|------|------|
| ATOM | 2643 | 2HB  | GLU | A | 202 | 56.262 | 33.633 | 22.260 | 1.00 | 0.00 |
| ATOM | 2644 | 1HG  | GLU | A | 202 | 56.894 | 32.870 | 19.909 | 1.00 | 0.00 |
| ATOM | 2645 | 2HG  | GLU | A | 202 | 58.566 | 33.222 | 20.402 | 1.00 | 0.00 |
| ATOM | 2646 | N    | ILE | A | 203 | 56.440 | 35.890 | 19.031 | 1.00 | 0.00 |
| ATOM | 2647 | CA   | ILE | A | 203 | 55.547 | 36.017 | 17.880 | 1.00 | 0.00 |
| ATOM | 2648 | C    | ILE | A | 203 | 56.270 | 35.595 | 16.610 | 1.00 | 0.00 |
| ATOM | 2649 | O    | ILE | A | 203 | 57.364 | 36.082 | 16.325 | 1.00 | 0.00 |
| ATOM | 2650 | CB   | ILE | A | 203 | 55.062 | 37.464 | 17.675 | 1.00 | 0.00 |
| ATOM | 2651 | CG1  | ILE | A | 203 | 54.204 | 37.983 | 18.822 | 1.00 | 0.00 |
| ATOM | 2652 | CG2  | ILE | A | 203 | 54.309 | 37.615 | 16.349 | 1.00 | 0.00 |
| ATOM | 2653 | CD1  | ILE | A | 203 | 53.745 | 39.417 | 18.554 | 1.00 | 0.00 |
| ATOM | 2654 | H    | ILE | A | 203 | 57.408 | 36.160 | 18.935 | 1.00 | 0.00 |
| ATOM | 2655 | HA   | ILE | A | 203 | 54.702 | 35.336 | 17.973 | 1.00 | 0.00 |
| ATOM | 2656 | HB   | ILE | A | 203 | 55.924 | 38.131 | 17.673 | 1.00 | 0.00 |
| ATOM | 2657 | 1HG1 | ILE | A | 203 | 53.351 | 37.313 | 18.918 | 1.00 | 0.00 |
| ATOM | 2658 | 2HG1 | ILE | A | 203 | 54.809 | 37.931 | 19.728 | 1.00 | 0.00 |
| ATOM | 2659 | 1HG2 | ILE | A | 203 | 53.979 | 38.647 | 16.233 | 1.00 | 0.00 |
| ATOM | 2660 | 2HG2 | ILE | A | 203 | 54.969 | 37.351 | 15.524 | 1.00 | 0.00 |
| ATOM | 2661 | 3HG2 | ILE | A | 203 | 53.442 | 36.955 | 16.345 | 1.00 | 0.00 |
| ATOM | 2662 | 1HD1 | ILE | A | 203 | 53.134 | 39.766 | 19.387 | 1.00 | 0.00 |
| ATOM | 2663 | 2HD1 | ILE | A | 203 | 54.616 | 40.065 | 18.447 | 1.00 | 0.00 |
| ATOM | 2664 | 3HD1 | ILE | A | 203 | 53.157 | 39.446 | 17.638 | 1.00 | 0.00 |
| ATOM | 2665 | N    | SER | A | 204 | 55.667 | 34.684 | 15.853 | 1.00 | 0.00 |
| ATOM | 2666 | CA   | SER | A | 204 | 56.252 | 34.246 | 14.588 | 1.00 | 0.00 |
| ATOM | 2667 | C    | SER | A | 204 | 55.361 | 34.866 | 13.521 | 1.00 | 0.00 |
| ATOM | 2668 | O    | SER | A | 204 | 55.769 | 35.787 | 12.815 | 1.00 | 0.00 |
| ATOM | 2669 | CB   | SER | A | 204 | 56.304 | 32.735 | 14.477 | 1.00 | 0.00 |
| ATOM | 2670 | OG   | SER | A | 204 | 56.847 | 32.315 | 13.256 | 1.00 | 0.00 |
| ATOM | 2671 | H    | SER | A | 204 | 54.789 | 34.285 | 16.153 | 1.00 | 0.00 |
| ATOM | 2672 | HA   | SER | A | 204 | 57.312 | 34.488 | 14.494 | 1.00 | 0.00 |
| ATOM | 2673 | 1HB  | SER | A | 204 | 56.917 | 32.347 | 15.290 | 1.00 | 0.00 |
| ATOM | 2674 | 2HB  | SER | A | 204 | 55.291 | 32.343 | 14.568 | 1.00 | 0.00 |
| ATOM | 2675 | HG   | SER | A | 204 | 57.742 | 32.652 | 13.171 | 1.00 | 0.00 |
| ATOM | 2676 | N    | ILE | A | 205 | 54.136 | 34.358 | 13.431 | 1.00 | 0.00 |
| ATOM | 2677 | CA   | ILE | A | 205 | 53.142 | 34.866 | 12.498 | 1.00 | 0.00 |
| ATOM | 2678 | C    | ILE | A | 205 | 51.874 | 35.187 | 13.295 | 1.00 | 0.00 |
| ATOM | 2679 | O    | ILE | A | 205 | 51.339 | 34.330 | 14.002 | 1.00 | 0.00 |
| ATOM | 2680 | CB   | ILE | A | 205 | 52.753 | 33.828 | 11.444 | 1.00 | 0.00 |
| ATOM | 2681 | CG1  | ILE | A | 205 | 53.942 | 33.257 | 10.684 | 1.00 | 0.00 |
| ATOM | 2682 | CG2  | ILE | A | 205 | 51.704 | 34.406 | 10.491 | 1.00 | 0.00 |
| ATOM | 2683 | CD1  | ILE | A | 205 | 53.454 | 32.187 | 9.709  | 1.00 | 0.00 |
| ATOM | 2684 | H    | ILE | A | 205 | 53.893 | 33.588 | 14.038 | 1.00 | 0.00 |
| ATOM | 2685 | HA   | ILE | A | 205 | 53.478 | 35.801 | 12.050 | 1.00 | 0.00 |
| ATOM | 2686 | HB   | ILE | A | 205 | 52.347 | 32.949 | 11.944 | 1.00 | 0.00 |
| ATOM | 2687 | 1HG1 | ILE | A | 205 | 54.423 | 34.085 | 10.165 | 1.00 | 0.00 |
| ATOM | 2688 | 2HG1 | ILE | A | 205 | 54.630 | 32.844 | 11.422 | 1.00 | 0.00 |
| ATOM | 2689 | 1HG2 | ILE | A | 205 | 51.437 | 33.657 | 9.746  | 1.00 | 0.00 |
| ATOM | 2690 | 2HG2 | ILE | A | 205 | 50.816 | 34.688 | 11.055 | 1.00 | 0.00 |
| ATOM | 2691 | 3HG2 | ILE | A | 205 | 52.111 | 35.285 | 9.991  | 1.00 | 0.00 |
| ATOM | 2692 | 1HD1 | ILE | A | 205 | 54.304 | 31.776 | 9.163  | 1.00 | 0.00 |
| ATOM | 2693 | 2HD1 | ILE | A | 205 | 52.958 | 31.388 | 10.262 | 1.00 | 0.00 |
| ATOM | 2694 | 3HD1 | ILE | A | 205 | 52.752 | 32.629 | 9.004  | 1.00 | 0.00 |
| ATOM | 2695 | N    | LEU | A | 206 | 51.403 | 36.427 | 13.192 | 1.00 | 0.00 |
| ATOM | 2696 | CA   | LEU | A | 206 | 50.193 | 36.839 | 13.896 | 1.00 | 0.00 |
| ATOM | 2697 | C    | LEU | A | 206 | 49.112 | 37.177 | 12.882 | 1.00 | 0.00 |
| ATOM | 2698 | O    | LEU | A | 206 | 49.370 | 37.921 | 11.934 | 1.00 | 0.00 |
| ATOM | 2699 | CB   | LEU | A | 206 | 50.476 | 38.038 | 14.810 | 1.00 | 0.00 |
| ATOM | 2700 | CG   | LEU | A | 206 | 49.231 | 38.741 | 15.368 | 1.00 | 0.00 |
| ATOM | 2701 | CD1  | LEU | A | 206 | 48.489 | 37.812 | 16.318 | 1.00 | 0.00 |
| ATOM | 2702 | CD2  | LEU | A | 206 | 49.646 | 40.021 | 16.079 | 1.00 | 0.00 |
| ATOM | 2703 | H    | LEU | A | 206 | 51.890 | 37.099 | 12.616 | 1.00 | 0.00 |
| ATOM | 2704 | HA   | LEU | A | 206 | 49.828 | 36.014 | 14.507 | 1.00 | 0.00 |
| ATOM | 2705 | 1HB  | LEU | A | 206 | 51.007 | 37.528 | 15.612 | 1.00 | 0.00 |

PEDF\_P1\_final\_docking\_model.txt

|      |      |      |     |   |     |        |        |        |      |      |
|------|------|------|-----|---|-----|--------|--------|--------|------|------|
| ATOM | 2706 | 2HB  | LEU | A | 206 | 51.140 | 38.760 | 14.335 | 1.00 | 0.00 |
| ATOM | 2707 | HG   | LEU | A | 206 | 48.608 | 39.019 | 14.518 | 1.00 | 0.00 |
| ATOM | 2708 | 1HD1 | LEU | A | 206 | 47.607 | 38.320 | 16.709 | 1.00 | 0.00 |
| ATOM | 2709 | 2HD1 | LEU | A | 206 | 48.181 | 36.914 | 15.783 | 1.00 | 0.00 |
| ATOM | 2710 | 3HD1 | LEU | A | 206 | 49.144 | 37.537 | 17.144 | 1.00 | 0.00 |
| ATOM | 2711 | 1HD2 | LEU | A | 206 | 48.761 | 40.520 | 16.474 | 1.00 | 0.00 |
| ATOM | 2712 | 2HD2 | LEU | A | 206 | 50.324 | 39.779 | 16.898 | 1.00 | 0.00 |
| ATOM | 2713 | 3HD2 | LEU | A | 206 | 50.150 | 40.682 | 15.374 | 1.00 | 0.00 |
| ATOM | 2714 | N    | LEU | A | 207 | 47.916 | 36.618 | 13.071 | 1.00 | 0.00 |
| ATOM | 2715 | CA   | LEU | A | 207 | 46.787 | 36.896 | 12.184 | 1.00 | 0.00 |
| ATOM | 2716 | C    | LEU | A | 207 | 45.811 | 37.749 | 12.967 | 1.00 | 0.00 |
| ATOM | 2717 | O    | LEU | A | 207 | 45.525 | 37.475 | 14.130 | 1.00 | 0.00 |
| ATOM | 2718 | CB   | LEU | A | 207 | 46.124 | 35.604 | 11.691 | 1.00 | 0.00 |
| ATOM | 2719 | CG   | LEU | A | 207 | 47.039 | 34.664 | 10.895 | 1.00 | 0.00 |
| ATOM | 2720 | CD1  | LEU | A | 207 | 46.291 | 33.385 | 10.540 | 1.00 | 0.00 |
| ATOM | 2721 | CD2  | LEU | A | 207 | 47.526 | 35.371 | 9.639  | 1.00 | 0.00 |
| ATOM | 2722 | H    | LEU | A | 207 | 47.787 | 35.986 | 13.848 | 1.00 | 0.00 |
| ATOM | 2723 | HA   | LEU | A | 207 | 47.134 | 37.454 | 11.315 | 1.00 | 0.00 |
| ATOM | 2724 | 1HB  | LEU | A | 207 | 45.873 | 35.156 | 12.651 | 1.00 | 0.00 |
| ATOM | 2725 | 2HB  | LEU | A | 207 | 45.210 | 35.806 | 11.134 | 1.00 | 0.00 |
| ATOM | 2726 | HG   | LEU | A | 207 | 47.909 | 34.454 | 11.518 | 1.00 | 0.00 |
| ATOM | 2727 | 1HD1 | LEU | A | 207 | 46.949 | 32.724 | 9.975  | 1.00 | 0.00 |
| ATOM | 2728 | 2HD1 | LEU | A | 207 | 45.973 | 32.884 | 11.454 | 1.00 | 0.00 |
| ATOM | 2729 | 3HD1 | LEU | A | 207 | 45.418 | 33.631 | 9.936  | 1.00 | 0.00 |
| ATOM | 2730 | 1HD2 | LEU | A | 207 | 48.176 | 34.702 | 9.074  | 1.00 | 0.00 |
| ATOM | 2731 | 2HD2 | LEU | A | 207 | 46.670 | 35.651 | 9.024  | 1.00 | 0.00 |
| ATOM | 2732 | 3HD2 | LEU | A | 207 | 48.081 | 36.266 | 9.917  | 1.00 | 0.00 |
| ATOM | 2733 | N    | LEU | A | 208 | 45.300 | 38.787 | 12.321 | 1.00 | 0.00 |
| ATOM | 2734 | CA   | LEU | A | 208 | 44.368 | 39.698 | 12.960 | 1.00 | 0.00 |
| ATOM | 2735 | C    | LEU | A | 208 | 43.093 | 39.865 | 12.130 | 1.00 | 0.00 |
| ATOM | 2736 | O    | LEU | A | 208 | 43.143 | 40.077 | 10.921 | 1.00 | 0.00 |
| ATOM | 2737 | CB   | LEU | A | 208 | 45.040 | 41.057 | 13.192 | 1.00 | 0.00 |
| ATOM | 2738 | CG   | LEU | A | 208 | 46.378 | 41.004 | 13.942 | 1.00 | 0.00 |
| ATOM | 2739 | CD1  | LEU | A | 208 | 47.020 | 42.384 | 13.961 | 1.00 | 0.00 |
| ATOM | 2740 | CD2  | LEU | A | 208 | 46.148 | 40.497 | 15.358 | 1.00 | 0.00 |
| ATOM | 2741 | H    | LEU | A | 208 | 45.565 | 38.949 | 11.360 | 1.00 | 0.00 |
| ATOM | 2742 | HA   | LEU | A | 208 | 44.056 | 39.287 | 13.920 | 1.00 | 0.00 |
| ATOM | 2743 | 1HB  | LEU | A | 208 | 45.204 | 41.353 | 12.157 | 1.00 | 0.00 |
| ATOM | 2744 | 2HB  | LEU | A | 208 | 44.364 | 41.766 | 13.670 | 1.00 | 0.00 |
| ATOM | 2745 | HG   | LEU | A | 208 | 47.009 | 40.280 | 13.427 | 1.00 | 0.00 |
| ATOM | 2746 | 1HD1 | LEU | A | 208 | 47.970 | 42.337 | 14.495 | 1.00 | 0.00 |
| ATOM | 2747 | 2HD1 | LEU | A | 208 | 47.197 | 42.717 | 12.938 | 1.00 | 0.00 |
| ATOM | 2748 | 3HD1 | LEU | A | 208 | 46.357 | 43.088 | 14.463 | 1.00 | 0.00 |
| ATOM | 2749 | 1HD2 | LEU | A | 208 | 47.099 | 40.459 | 15.889 | 1.00 | 0.00 |
| ATOM | 2750 | 2HD2 | LEU | A | 208 | 45.466 | 41.169 | 15.879 | 1.00 | 0.00 |
| ATOM | 2751 | 3HD2 | LEU | A | 208 | 45.713 | 39.498 | 15.321 | 1.00 | 0.00 |
| ATOM | 2752 | N    | GLY | A | 209 | 41.947 | 39.747 | 12.787 | 1.00 | 0.00 |
| ATOM | 2753 | CA   | GLY | A | 209 | 40.681 | 39.899 | 12.097 | 1.00 | 0.00 |
| ATOM | 2754 | C    | GLY | A | 209 | 39.777 | 40.830 | 12.883 | 1.00 | 0.00 |
| ATOM | 2755 | O    | GLY | A | 209 | 39.300 | 40.478 | 13.963 | 1.00 | 0.00 |
| ATOM | 2756 | H    | GLY | A | 209 | 41.947 | 39.549 | 13.777 | 1.00 | 0.00 |
| ATOM | 2757 | 1HA  | GLY | A | 209 | 40.863 | 40.313 | 11.105 | 1.00 | 0.00 |
| ATOM | 2758 | 2HA  | GLY | A | 209 | 40.209 | 38.922 | 12.000 | 1.00 | 0.00 |
| ATOM | 2759 | N    | VAL | A | 210 | 39.555 | 42.028 | 12.355 | 1.00 | 0.00 |
| ATOM | 2760 | CA   | VAL | A | 210 | 38.701 | 42.989 | 13.027 | 1.00 | 0.00 |
| ATOM | 2761 | C    | VAL | A | 210 | 37.504 | 43.327 | 12.162 | 1.00 | 0.00 |
| ATOM | 2762 | O    | VAL | A | 210 | 37.615 | 43.435 | 10.938 | 1.00 | 0.00 |
| ATOM | 2763 | CB   | VAL | A | 210 | 39.460 | 44.284 | 13.373 | 1.00 | 0.00 |
| ATOM | 2764 | CG1  | VAL | A | 210 | 40.755 | 43.962 | 14.105 | 1.00 | 0.00 |
| ATOM | 2765 | CG2  | VAL | A | 210 | 39.747 | 45.087 | 12.113 | 1.00 | 0.00 |
| ATOM | 2766 | H    | VAL | A | 210 | 39.982 | 42.280 | 11.475 | 1.00 | 0.00 |
| ATOM | 2767 | HA   | VAL | A | 210 | 38.286 | 42.576 | 13.947 | 1.00 | 0.00 |
| ATOM | 2768 | HB   | VAL | A | 210 | 38.829 | 44.905 | 14.008 | 1.00 | 0.00 |

PEDF\_P1\_final\_docking\_model.txt

|      |      |      |     |   |     |        |        |        |      |      |
|------|------|------|-----|---|-----|--------|--------|--------|------|------|
| ATOM | 2769 | 1HG1 | VAL | A | 210 | 41.278 | 44.889 | 14.342 | 1.00 | 0.00 |
| ATOM | 2770 | 2HG1 | VAL | A | 210 | 40.529 | 43.428 | 15.027 | 1.00 | 0.00 |
| ATOM | 2771 | 3HG1 | VAL | A | 210 | 41.387 | 43.342 | 13.470 | 1.00 | 0.00 |
| ATOM | 2772 | 1HG2 | VAL | A | 210 | 40.283 | 45.998 | 12.376 | 1.00 | 0.00 |
| ATOM | 2773 | 2HG2 | VAL | A | 210 | 40.356 | 44.490 | 11.434 | 1.00 | 0.00 |
| ATOM | 2774 | 3HG2 | VAL | A | 210 | 38.807 | 45.347 | 11.626 | 1.00 | 0.00 |
| ATOM | 2775 | N    | ALA | A | 211 | 36.358 | 43.487 | 12.820 | 1.00 | 0.00 |
| ATOM | 2776 | CA   | ALA | A | 211 | 35.108 | 43.786 | 12.144 | 1.00 | 0.00 |
| ATOM | 2777 | C    | ALA | A | 211 | 34.182 | 44.616 | 13.026 | 1.00 | 0.00 |
| ATOM | 2778 | O    | ALA | A | 211 | 34.205 | 44.498 | 14.253 | 1.00 | 0.00 |
| ATOM | 2779 | CB   | ALA | A | 211 | 34.389 | 42.504 | 11.732 | 1.00 | 0.00 |
| ATOM | 2780 | H    | ALA | A | 211 | 36.364 | 43.396 | 13.826 | 1.00 | 0.00 |
| ATOM | 2781 | HA   | ALA | A | 211 | 35.324 | 44.381 | 11.256 | 1.00 | 0.00 |
| ATOM | 2782 | 1HB  | ALA | A | 211 | 33.456 | 42.757 | 11.228 | 1.00 | 0.00 |
| ATOM | 2783 | 2HB  | ALA | A | 211 | 35.023 | 41.932 | 11.055 | 1.00 | 0.00 |
| ATOM | 2784 | 3HB  | ALA | A | 211 | 34.172 | 41.908 | 12.617 | 1.00 | 0.00 |
| ATOM | 2785 | N    | HIS | A | 212 | 33.376 | 45.466 | 12.394 | 1.00 | 0.00 |
| ATOM | 2786 | CA   | HIS | A | 212 | 32.415 | 46.293 | 13.110 | 1.00 | 0.00 |
| ATOM | 2787 | C    | HIS | A | 212 | 31.091 | 46.363 | 12.358 | 1.00 | 0.00 |
| ATOM | 2788 | O    | HIS | A | 212 | 31.070 | 46.341 | 11.124 | 1.00 | 0.00 |
| ATOM | 2789 | CB   | HIS | A | 212 | 32.989 | 47.697 | 13.323 | 1.00 | 0.00 |
| ATOM | 2790 | CG   | HIS | A | 212 | 31.914 | 48.610 | 13.863 | 1.00 | 0.00 |
| ATOM | 2791 | ND1  | HIS | A | 212 | 31.358 | 48.474 | 15.081 | 1.00 | 0.00 |
| ATOM | 2792 | CD2  | HIS | A | 212 | 31.316 | 49.694 | 13.213 | 1.00 | 0.00 |
| ATOM | 2793 | CE1  | HIS | A | 212 | 30.415 | 49.462 | 15.208 | 1.00 | 0.00 |
| ATOM | 2794 | NE2  | HIS | A | 212 | 30.391 | 50.212 | 14.058 | 1.00 | 0.00 |
| ATOM | 2795 | H    | HIS | A | 212 | 33.434 | 45.538 | 11.388 | 1.00 | 0.00 |
| ATOM | 2796 | HA   | HIS | A | 212 | 32.200 | 45.848 | 14.081 | 1.00 | 0.00 |
| ATOM | 2797 | 1HB  | HIS | A | 212 | 33.810 | 47.663 | 14.040 | 1.00 | 0.00 |
| ATOM | 2798 | 2HB  | HIS | A | 212 | 33.349 | 48.102 | 12.378 | 1.00 | 0.00 |
| ATOM | 2799 | HD2  | HIS | A | 212 | 31.467 | 50.140 | 12.229 | 1.00 | 0.00 |
| ATOM | 2800 | HE1  | HIS | A | 212 | 29.827 | 49.554 | 16.121 | 1.00 | 0.00 |
| ATOM | 2801 | HE2  | HIS | A | 212 | 29.791 | 51.005 | 13.879 | 1.00 | 0.00 |
| ATOM | 2802 | N    | PHE | A | 213 | 29.988 | 46.461 | 13.096 | 1.00 | 0.00 |
| ATOM | 2803 | CA   | PHE | A | 213 | 28.678 | 46.545 | 12.459 | 1.00 | 0.00 |
| ATOM | 2804 | C    | PHE | A | 213 | 27.603 | 47.320 | 13.231 | 1.00 | 0.00 |
| ATOM | 2805 | O    | PHE | A | 213 | 27.314 | 47.038 | 14.400 | 1.00 | 0.00 |
| ATOM | 2806 | CB   | PHE | A | 213 | 28.150 | 45.146 | 12.129 | 1.00 | 0.00 |
| ATOM | 2807 | CG   | PHE | A | 213 | 26.889 | 45.241 | 11.300 | 1.00 | 0.00 |
| ATOM | 2808 | CD1  | PHE | A | 213 | 26.978 | 45.417 | 9.926  | 1.00 | 0.00 |
| ATOM | 2809 | CD2  | PHE | A | 213 | 25.639 | 45.150 | 11.903 | 1.00 | 0.00 |
| ATOM | 2810 | CE1  | PHE | A | 213 | 25.824 | 45.498 | 9.157  | 1.00 | 0.00 |
| ATOM | 2811 | CE2  | PHE | A | 213 | 24.483 | 45.230 | 11.136 | 1.00 | 0.00 |
| ATOM | 2812 | CZ   | PHE | A | 213 | 24.576 | 45.403 | 9.761  | 1.00 | 0.00 |
| ATOM | 2813 | H    | PHE | A | 213 | 30.047 | 46.478 | 14.104 | 1.00 | 0.00 |
| ATOM | 2814 | HA   | PHE | A | 213 | 28.758 | 47.092 | 11.518 | 1.00 | 0.00 |
| ATOM | 2815 | 1HB  | PHE | A | 213 | 28.894 | 44.589 | 11.561 | 1.00 | 0.00 |
| ATOM | 2816 | 2HB  | PHE | A | 213 | 27.917 | 44.608 | 13.047 | 1.00 | 0.00 |
| ATOM | 2817 | HD1  | PHE | A | 213 | 27.962 | 45.490 | 9.461  | 1.00 | 0.00 |
| ATOM | 2818 | HD2  | PHE | A | 213 | 25.568 | 45.015 | 12.983 | 1.00 | 0.00 |
| ATOM | 2819 | HE1  | PHE | A | 213 | 25.897 | 45.636 | 8.079  | 1.00 | 0.00 |
| ATOM | 2820 | HE2  | PHE | A | 213 | 23.505 | 45.158 | 11.611 | 1.00 | 0.00 |
| ATOM | 2821 | HZ   | PHE | A | 213 | 23.671 | 45.465 | 9.158  | 1.00 | 0.00 |
| ATOM | 2822 | N    | LYS | A | 214 | 27.011 | 48.293 | 12.547 | 1.00 | 0.00 |
| ATOM | 2823 | CA   | LYS | A | 214 | 25.938 | 49.113 | 13.089 | 1.00 | 0.00 |
| ATOM | 2824 | C    | LYS | A | 214 | 25.045 | 49.337 | 11.872 | 1.00 | 0.00 |
| ATOM | 2825 | O    | LYS | A | 214 | 25.362 | 50.157 | 11.010 | 1.00 | 0.00 |
| ATOM | 2826 | CB   | LYS | A | 214 | 26.440 | 50.426 | 13.691 | 1.00 | 0.00 |
| ATOM | 2827 | CG   | LYS | A | 214 | 25.362 | 51.259 | 14.372 | 1.00 | 0.00 |
| ATOM | 2828 | CD   | LYS | A | 214 | 25.954 | 52.490 | 15.041 | 1.00 | 0.00 |
| ATOM | 2829 | CE   | LYS | A | 214 | 24.896 | 53.262 | 15.817 | 1.00 | 0.00 |
| ATOM | 2830 | NZ   | LYS | A | 214 | 25.477 | 54.421 | 16.547 | 1.00 | 0.00 |
| ATOM | 2831 | H    | LYS | A | 214 | 27.331 | 48.462 | 11.604 | 1.00 | 0.00 |

PEDF\_P1\_final\_docking\_model.txt

|      |      |      |     |   |     |        |        |        |      |      |
|------|------|------|-----|---|-----|--------|--------|--------|------|------|
| ATOM | 2832 | HA   | LYS | A | 214 | 25.421 | 48.568 | 13.880 | 1.00 | 0.00 |
| ATOM | 2833 | 1HB  | LYS | A | 214 | 27.213 | 50.170 | 14.417 | 1.00 | 0.00 |
| ATOM | 2834 | 2HB  | LYS | A | 214 | 26.883 | 51.002 | 12.879 | 1.00 | 0.00 |
| ATOM | 2835 | 1HG  | LYS | A | 214 | 24.636 | 51.568 | 13.619 | 1.00 | 0.00 |
| ATOM | 2836 | 2HG  | LYS | A | 214 | 24.867 | 50.641 | 15.120 | 1.00 | 0.00 |
| ATOM | 2837 | 1HD  | LYS | A | 214 | 26.743 | 52.169 | 15.723 | 1.00 | 0.00 |
| ATOM | 2838 | 2HD  | LYS | A | 214 | 26.380 | 53.133 | 14.272 | 1.00 | 0.00 |
| ATOM | 2839 | 1HE  | LYS | A | 214 | 24.146 | 53.617 | 15.111 | 1.00 | 0.00 |
| ATOM | 2840 | 2HE  | LYS | A | 214 | 24.430 | 52.581 | 16.529 | 1.00 | 0.00 |
| ATOM | 2841 | 1HZ  | LYS | A | 214 | 24.745 | 54.905 | 17.048 | 1.00 | 0.00 |
| ATOM | 2842 | 2HZ  | LYS | A | 214 | 26.172 | 54.093 | 17.203 | 1.00 | 0.00 |
| ATOM | 2843 | 3HZ  | LYS | A | 214 | 25.908 | 55.053 | 15.888 | 1.00 | 0.00 |
| ATOM | 2844 | N    | GLY | A | 215 | 23.941 | 48.600 | 11.785 | 1.00 | 0.00 |
| ATOM | 2845 | CA   | GLY | A | 215 | 23.069 | 48.743 | 10.633 | 1.00 | 0.00 |
| ATOM | 2846 | C    | GLY | A | 215 | 21.743 | 49.448 | 10.843 | 1.00 | 0.00 |
| ATOM | 2847 | O    | GLY | A | 215 | 21.564 | 50.194 | 11.807 | 1.00 | 0.00 |
| ATOM | 2848 | H    | GLY | A | 215 | 23.696 | 47.939 | 12.508 | 1.00 | 0.00 |
| ATOM | 2849 | 1HA  | GLY | A | 215 | 23.588 | 49.312 | 9.862  | 1.00 | 0.00 |
| ATOM | 2850 | 2HA  | GLY | A | 215 | 22.821 | 47.754 | 10.249 | 1.00 | 0.00 |
| ATOM | 2851 | N    | GLN | A | 216 | 20.818 | 49.214 | 9.913  | 1.00 | 0.00 |
| ATOM | 2852 | CA   | GLN | A | 216 | 19.485 | 49.800 | 9.968  | 1.00 | 0.00 |
| ATOM | 2853 | C    | GLN | A | 216 | 18.447 | 48.835 | 9.421  | 1.00 | 0.00 |
| ATOM | 2854 | O    | GLN | A | 216 | 18.663 | 48.206 | 8.384  | 1.00 | 0.00 |
| ATOM | 2855 | CB   | GLN | A | 216 | 19.439 | 51.111 | 9.179  | 1.00 | 0.00 |
| ATOM | 2856 | CG   | GLN | A | 216 | 20.238 | 52.242 | 9.804  | 1.00 | 0.00 |
| ATOM | 2857 | CD   | GLN | A | 216 | 20.127 | 53.534 | 9.017  | 1.00 | 0.00 |
| ATOM | 2858 | OE1  | GLN | A | 216 | 19.415 | 53.604 | 8.011  | 1.00 | 0.00 |
| ATOM | 2859 | NE2  | GLN | A | 216 | 20.834 | 54.564 | 9.468  | 1.00 | 0.00 |
| ATOM | 2860 | H    | GLN | A | 216 | 21.057 | 48.606 | 9.143  | 1.00 | 0.00 |
| ATOM | 2861 | HA   | GLN | A | 216 | 19.215 | 49.997 | 11.005 | 1.00 | 0.00 |
| ATOM | 2862 | 1HB  | GLN | A | 216 | 19.825 | 50.893 | 8.183  | 1.00 | 0.00 |
| ATOM | 2863 | 2HB  | GLN | A | 216 | 18.390 | 51.398 | 9.107  | 1.00 | 0.00 |
| ATOM | 2864 | 1HG  | GLN | A | 216 | 20.179 | 52.490 | 10.864 | 1.00 | 0.00 |
| ATOM | 2865 | 2HG  | GLN | A | 216 | 21.208 | 51.791 | 9.591  | 1.00 | 0.00 |
| ATOM | 2866 | 1HE2 | GLN | A | 216 | 20.800 | 55.442 | 8.989  | 1.00 | 0.00 |
| ATOM | 2867 | 2HE2 | GLN | A | 216 | 21.399 | 54.462 | 10.287 | 1.00 | 0.00 |
| ATOM | 2868 | N    | TRP | A | 217 | 17.318 | 48.728 | 10.116 | 1.00 | 0.00 |
| ATOM | 2869 | CA   | TRP | A | 217 | 16.233 | 47.861 | 9.675  | 1.00 | 0.00 |
| ATOM | 2870 | C    | TRP | A | 217 | 15.526 | 48.627 | 8.570  | 1.00 | 0.00 |
| ATOM | 2871 | O    | TRP | A | 217 | 15.705 | 49.837 | 8.443  | 1.00 | 0.00 |
| ATOM | 2872 | CB   | TRP | A | 217 | 15.242 | 47.552 | 10.794 | 1.00 | 0.00 |
| ATOM | 2873 | CG   | TRP | A | 217 | 15.948 | 47.255 | 12.092 | 1.00 | 0.00 |
| ATOM | 2874 | CD1  | TRP | A | 217 | 16.162 | 48.160 | 13.139 | 1.00 | 0.00 |
| ATOM | 2875 | CD2  | TRP | A | 217 | 16.518 | 46.009 | 12.547 | 1.00 | 0.00 |
| ATOM | 2876 | NE1  | TRP | A | 217 | 16.807 | 47.560 | 14.171 | 1.00 | 0.00 |
| ATOM | 2877 | CE2  | TRP | A | 217 | 17.043 | 46.230 | 13.842 | 1.00 | 0.00 |
| ATOM | 2878 | CE3  | TRP | A | 217 | 16.619 | 44.748 | 11.972 | 1.00 | 0.00 |
| ATOM | 2879 | CZ2  | TRP | A | 217 | 17.650 | 45.186 | 14.528 | 1.00 | 0.00 |
| ATOM | 2880 | CZ3  | TRP | A | 217 | 17.230 | 43.712 | 12.669 | 1.00 | 0.00 |
| ATOM | 2881 | CH2  | TRP | A | 217 | 17.743 | 43.929 | 13.942 | 1.00 | 0.00 |
| ATOM | 2882 | H    | TRP | A | 217 | 17.208 | 49.259 | 10.968 | 1.00 | 0.00 |
| ATOM | 2883 | HA   | TRP | A | 217 | 16.640 | 46.928 | 9.287  | 1.00 | 0.00 |
| ATOM | 2884 | 1HB  | TRP | A | 217 | 14.585 | 48.405 | 10.963 | 1.00 | 0.00 |
| ATOM | 2885 | 2HB  | TRP | A | 217 | 14.644 | 46.679 | 10.535 | 1.00 | 0.00 |
| ATOM | 2886 | HD1  | TRP | A | 217 | 15.800 | 49.176 | 12.993 | 1.00 | 0.00 |
| ATOM | 2887 | HE1  | TRP | A | 217 | 17.073 | 48.006 | 15.037 | 1.00 | 0.00 |
| ATOM | 2888 | HE3  | TRP | A | 217 | 16.227 | 44.540 | 10.977 | 1.00 | 0.00 |
| ATOM | 2889 | HZ2  | TRP | A | 217 | 18.046 | 45.372 | 15.527 | 1.00 | 0.00 |
| ATOM | 2890 | HZ3  | TRP | A | 217 | 17.300 | 42.730 | 12.200 | 1.00 | 0.00 |
| ATOM | 2891 | HH2  | TRP | A | 217 | 18.222 | 43.117 | 14.490 | 1.00 | 0.00 |
| ATOM | 2892 | N    | VAL | A | 218 | 14.731 | 47.936 | 7.762  | 1.00 | 0.00 |
| ATOM | 2893 | CA   | VAL | A | 218 | 14.005 | 48.631 | 6.710  | 1.00 | 0.00 |
| ATOM | 2894 | C    | VAL | A | 218 | 12.898 | 49.413 | 7.429  | 1.00 | 0.00 |

PEDF\_P1\_final\_docking\_model.txt

|      |      |      |     |   |     |        |        |        |      |      |
|------|------|------|-----|---|-----|--------|--------|--------|------|------|
| ATOM | 2895 | O    | VAL | A | 218 | 12.459 | 50.469 | 6.972  | 1.00 | 0.00 |
| ATOM | 2896 | CB   | VAL | A | 218 | 13.406 | 47.676 | 5.661  | 1.00 | 0.00 |
| ATOM | 2897 | CG1  | VAL | A | 218 | 12.524 | 48.441 | 4.685  | 1.00 | 0.00 |
| ATOM | 2898 | CG2  | VAL | A | 218 | 14.510 | 46.941 | 4.916  | 1.00 | 0.00 |
| ATOM | 2899 | H    | VAL | A | 218 | 14.618 | 46.937 | 7.861  | 1.00 | 0.00 |
| ATOM | 2900 | HA   | VAL | A | 218 | 14.647 | 49.340 | 6.187  | 1.00 | 0.00 |
| ATOM | 2901 | HB   | VAL | A | 218 | 12.810 | 46.918 | 6.171  | 1.00 | 0.00 |
| ATOM | 2902 | 1HG1 | VAL | A | 218 | 12.109 | 47.750 | 3.951  | 1.00 | 0.00 |
| ATOM | 2903 | 2HG1 | VAL | A | 218 | 11.712 | 48.923 | 5.229  | 1.00 | 0.00 |
| ATOM | 2904 | 3HG1 | VAL | A | 218 | 13.120 | 49.198 | 4.174  | 1.00 | 0.00 |
| ATOM | 2905 | 1HG2 | VAL | A | 218 | 14.069 | 46.270 | 4.180  | 1.00 | 0.00 |
| ATOM | 2906 | 2HG2 | VAL | A | 218 | 15.150 | 47.665 | 4.411  | 1.00 | 0.00 |
| ATOM | 2907 | 3HG2 | VAL | A | 218 | 15.104 | 46.363 | 5.624  | 1.00 | 0.00 |
| ATOM | 2908 | N    | THR | A | 219 | 12.470 | 48.885 | 8.572  | 1.00 | 0.00 |
| ATOM | 2909 | CA   | THR | A | 219 | 11.431 | 49.513 | 9.370  | 1.00 | 0.00 |
| ATOM | 2910 | C    | THR | A | 219 | 12.001 | 49.866 | 10.724 | 1.00 | 0.00 |
| ATOM | 2911 | O    | THR | A | 219 | 12.475 | 48.991 | 11.444 | 1.00 | 0.00 |
| ATOM | 2912 | CB   | THR | A | 219 | 10.202 | 48.603 | 9.549  | 1.00 | 0.00 |
| ATOM | 2913 | OG1  | THR | A | 219 | 9.642  | 48.294 | 8.267  | 1.00 | 0.00 |
| ATOM | 2914 | CG2  | THR | A | 219 | 9.150  | 49.290 | 10.406 | 1.00 | 0.00 |
| ATOM | 2915 | H    | THR | A | 219 | 12.882 | 48.020 | 8.893  | 1.00 | 0.00 |
| ATOM | 2916 | HA   | THR | A | 219 | 11.106 | 50.437 | 8.891  | 1.00 | 0.00 |
| ATOM | 2917 | HB   | THR | A | 219 | 10.514 | 47.677 | 10.032 | 1.00 | 0.00 |
| ATOM | 2918 | HG1  | THR | A | 219 | 10.153 | 47.592 | 7.855  | 1.00 | 0.00 |
| ATOM | 2919 | 1HG2 | THR | A | 219 | 8.289  | 48.631 | 10.522 | 1.00 | 0.00 |
| ATOM | 2920 | 2HG2 | THR | A | 219 | 9.570  | 49.516 | 11.386 | 1.00 | 0.00 |
| ATOM | 2921 | 3HG2 | THR | A | 219 | 8.836  | 50.215 | 9.924  | 1.00 | 0.00 |
| ATOM | 2922 | N    | LYS | A | 220 | 11.953 | 51.144 | 11.075 | 1.00 | 0.00 |
| ATOM | 2923 | CA   | LYS | A | 220 | 12.472 | 51.577 | 12.361 | 1.00 | 0.00 |
| ATOM | 2924 | C    | LYS | A | 220 | 11.495 | 51.217 | 13.473 | 1.00 | 0.00 |
| ATOM | 2925 | O    | LYS | A | 220 | 10.346 | 50.841 | 13.216 | 1.00 | 0.00 |
| ATOM | 2926 | CB   | LYS | A | 220 | 12.743 | 53.082 | 12.355 | 1.00 | 0.00 |
| ATOM | 2927 | CG   | LYS | A | 220 | 11.497 | 53.945 | 12.206 | 1.00 | 0.00 |
| ATOM | 2928 | CD   | LYS | A | 220 | 11.851 | 55.424 | 12.149 | 1.00 | 0.00 |
| ATOM | 2929 | CE   | LYS | A | 220 | 10.604 | 56.288 | 12.032 | 1.00 | 0.00 |
| ATOM | 2930 | NZ   | LYS | A | 220 | 10.932 | 57.740 | 12.025 | 1.00 | 0.00 |
| ATOM | 2931 | H    | LYS | A | 220 | 11.554 | 51.829 | 10.449 | 1.00 | 0.00 |
| ATOM | 2932 | HA   | LYS | A | 220 | 13.407 | 51.058 | 12.575 | 1.00 | 0.00 |
| ATOM | 2933 | 1HB  | LYS | A | 220 | 13.239 | 53.321 | 13.296 | 1.00 | 0.00 |
| ATOM | 2934 | 2HB  | LYS | A | 220 | 13.423 | 53.282 | 11.527 | 1.00 | 0.00 |
| ATOM | 2935 | 1HG  | LYS | A | 220 | 10.985 | 53.658 | 11.286 | 1.00 | 0.00 |
| ATOM | 2936 | 2HG  | LYS | A | 220 | 10.843 | 53.760 | 13.058 | 1.00 | 0.00 |
| ATOM | 2937 | 1HD  | LYS | A | 220 | 12.392 | 55.686 | 13.059 | 1.00 | 0.00 |
| ATOM | 2938 | 2HD  | LYS | A | 220 | 12.492 | 55.594 | 11.285 | 1.00 | 0.00 |
| ATOM | 2939 | 1HE  | LYS | A | 220 | 10.093 | 56.027 | 11.107 | 1.00 | 0.00 |
| ATOM | 2940 | 2HE  | LYS | A | 220 | 9.955  | 56.067 | 12.879 | 1.00 | 0.00 |
| ATOM | 2941 | 1HZ  | LYS | A | 220 | 10.080 | 58.277 | 11.947 | 1.00 | 0.00 |
| ATOM | 2942 | 2HZ  | LYS | A | 220 | 11.406 | 57.983 | 12.884 | 1.00 | 0.00 |
| ATOM | 2943 | 3HZ  | LYS | A | 220 | 11.533 | 57.945 | 11.239 | 1.00 | 0.00 |
| ATOM | 2944 | N    | PHE | A | 221 | 11.973 | 51.321 | 14.707 | 1.00 | 0.00 |
| ATOM | 2945 | CA   | PHE | A | 221 | 11.165 | 51.048 | 15.881 | 1.00 | 0.00 |
| ATOM | 2946 | C    | PHE | A | 221 | 10.824 | 52.390 | 16.505 | 1.00 | 0.00 |
| ATOM | 2947 | O    | PHE | A | 221 | 11.558 | 53.366 | 16.328 | 1.00 | 0.00 |
| ATOM | 2948 | CB   | PHE | A | 221 | 11.899 | 50.170 | 16.895 | 1.00 | 0.00 |
| ATOM | 2949 | CG   | PHE | A | 221 | 12.098 | 48.778 | 16.349 | 1.00 | 0.00 |
| ATOM | 2950 | CD1  | PHE | A | 221 | 11.039 | 47.880 | 16.349 | 1.00 | 0.00 |
| ATOM | 2951 | CD2  | PHE | A | 221 | 13.339 | 48.393 | 15.856 | 1.00 | 0.00 |
| ATOM | 2952 | CE1  | PHE | A | 221 | 11.222 | 46.591 | 15.863 | 1.00 | 0.00 |
| ATOM | 2953 | CE2  | PHE | A | 221 | 13.521 | 47.104 | 15.371 | 1.00 | 0.00 |
| ATOM | 2954 | CZ   | PHE | A | 221 | 12.464 | 46.202 | 15.377 | 1.00 | 0.00 |
| ATOM | 2955 | H    | PHE | A | 221 | 12.936 | 51.601 | 14.827 | 1.00 | 0.00 |
| ATOM | 2956 | HA   | PHE | A | 221 | 10.243 | 50.545 | 15.587 | 1.00 | 0.00 |
| ATOM | 2957 | 1HB  | PHE | A | 221 | 12.878 | 50.592 | 17.118 | 1.00 | 0.00 |

PEDF\_P1\_final\_docking\_model.txt

|      |      |      |     |   |     |        |        |        |      |      |
|------|------|------|-----|---|-----|--------|--------|--------|------|------|
| ATOM | 2958 | 2HB  | PHE | A | 221 | 11.319 | 50.095 | 17.814 | 1.00 | 0.00 |
| ATOM | 2959 | HD1  | PHE | A | 221 | 10.070 | 48.200 | 16.732 | 1.00 | 0.00 |
| ATOM | 2960 | HD2  | PHE | A | 221 | 14.170 | 49.099 | 15.851 | 1.00 | 0.00 |
| ATOM | 2961 | HE1  | PHE | A | 221 | 10.391 | 45.886 | 15.863 | 1.00 | 0.00 |
| ATOM | 2962 | HE2  | PHE | A | 221 | 14.494 | 46.800 | 14.986 | 1.00 | 0.00 |
| ATOM | 2963 | HZ   | PHE | A | 221 | 12.611 | 45.190 | 15.002 | 1.00 | 0.00 |
| ATOM | 2964 | N    | ASP | A | 222 | 9.715  | 52.441 | 17.235 | 1.00 | 0.00 |
| ATOM | 2965 | CA   | ASP | A | 222 | 9.300  | 53.675 | 17.884 | 1.00 | 0.00 |
| ATOM | 2966 | C    | ASP | A | 222 | 10.097 | 53.828 | 19.175 | 1.00 | 0.00 |
| ATOM | 2967 | O    | ASP | A | 222 | 9.884  | 53.085 | 20.134 | 1.00 | 0.00 |
| ATOM | 2968 | CB   | ASP | A | 222 | 7.796  | 53.675 | 18.168 | 1.00 | 0.00 |
| ATOM | 2969 | CG   | ASP | A | 222 | 7.275  | 54.959 | 18.798 | 1.00 | 0.00 |
| ATOM | 2970 | OD1  | ASP | A | 222 | 8.074  | 55.805 | 19.124 | 1.00 | 0.00 |
| ATOM | 2971 | OD2  | ASP | A | 222 | 6.082  | 55.152 | 18.806 | 1.00 | 0.00 |
| ATOM | 2972 | H    | ASP | A | 222 | 9.147  | 51.613 | 17.344 | 1.00 | 0.00 |
| ATOM | 2973 | HA   | ASP | A | 222 | 9.525  | 54.525 | 17.239 | 1.00 | 0.00 |
| ATOM | 2974 | 1HB  | ASP | A | 222 | 7.189  | 53.426 | 17.297 | 1.00 | 0.00 |
| ATOM | 2975 | 2HB  | ASP | A | 222 | 7.739  | 52.864 | 18.895 | 1.00 | 0.00 |
| ATOM | 2976 | N    | SER | A | 223 | 11.018 | 54.788 | 19.195 | 1.00 | 0.00 |
| ATOM | 2977 | CA   | SER | A | 223 | 11.849 | 55.017 | 20.372 | 1.00 | 0.00 |
| ATOM | 2978 | C    | SER | A | 223 | 10.998 | 55.288 | 21.610 | 1.00 | 0.00 |
| ATOM | 2979 | O    | SER | A | 223 | 11.456 | 55.131 | 22.746 | 1.00 | 0.00 |
| ATOM | 2980 | CB   | SER | A | 223 | 12.799 | 56.172 | 20.121 | 1.00 | 0.00 |
| ATOM | 2981 | OG   | SER | A | 223 | 12.119 | 57.387 | 19.962 | 1.00 | 0.00 |
| ATOM | 2982 | H    | SER | A | 223 | 11.147 | 55.371 | 18.381 | 1.00 | 0.00 |
| ATOM | 2983 | HA   | SER | A | 223 | 12.546 | 54.203 | 20.575 | 1.00 | 0.00 |
| ATOM | 2984 | 1HB  | SER | A | 223 | 13.479 | 56.254 | 20.969 | 1.00 | 0.00 |
| ATOM | 2985 | 2HB  | SER | A | 223 | 13.370 | 55.965 | 19.217 | 1.00 | 0.00 |
| ATOM | 2986 | HG   | SER | A | 223 | 12.754 | 58.090 | 19.806 | 1.00 | 0.00 |
| ATOM | 2987 | N    | ARG | A | 224 | 9.754  | 55.693 | 21.384 | 1.00 | 0.00 |
| ATOM | 2988 | CA   | ARG | A | 224 | 8.841  | 55.987 | 22.480 | 1.00 | 0.00 |
| ATOM | 2989 | C    | ARG | A | 224 | 8.186  | 54.702 | 22.988 | 1.00 | 0.00 |
| ATOM | 2990 | O    | ARG | A | 224 | 7.569  | 54.688 | 24.057 | 1.00 | 0.00 |
| ATOM | 2991 | CB   | ARG | A | 224 | 7.807  | 57.038 | 22.104 | 1.00 | 0.00 |
| ATOM | 2992 | CG   | ARG | A | 224 | 8.372  | 58.423 | 21.832 | 1.00 | 0.00 |
| ATOM | 2993 | CD   | ARG | A | 224 | 7.369  | 59.412 | 21.361 | 1.00 | 0.00 |
| ATOM | 2994 | NE   | ARG | A | 224 | 6.805  | 59.122 | 20.053 | 1.00 | 0.00 |
| ATOM | 2995 | CZ   | ARG | A | 224 | 5.805  | 59.820 | 19.479 | 1.00 | 0.00 |
| ATOM | 2996 | NH1  | ARG | A | 224 | 5.231  | 60.822 | 20.107 | 1.00 | 0.00 |
| ATOM | 2997 | NH2  | ARG | A | 224 | 5.398  | 59.454 | 18.276 | 1.00 | 0.00 |
| ATOM | 2998 | H    | ARG | A | 224 | 9.432  | 55.800 | 20.433 | 1.00 | 0.00 |
| ATOM | 2999 | HA   | ARG | A | 224 | 9.394  | 56.415 | 23.317 | 1.00 | 0.00 |
| ATOM | 3000 | 1HB  | ARG | A | 224 | 7.296  | 56.677 | 21.212 | 1.00 | 0.00 |
| ATOM | 3001 | 2HB  | ARG | A | 224 | 7.098  | 57.096 | 22.930 | 1.00 | 0.00 |
| ATOM | 3002 | 1HG  | ARG | A | 224 | 8.814  | 58.805 | 22.753 | 1.00 | 0.00 |
| ATOM | 3003 | 2HG  | ARG | A | 224 | 9.145  | 58.337 | 21.067 | 1.00 | 0.00 |
| ATOM | 3004 | 1HD  | ARG | A | 224 | 6.544  | 59.445 | 22.072 | 1.00 | 0.00 |
| ATOM | 3005 | 2HD  | ARG | A | 224 | 7.839  | 60.393 | 21.304 | 1.00 | 0.00 |
| ATOM | 3006 | HE   | ARG | A | 224 | 7.048  | 58.396 | 19.392 | 1.00 | 0.00 |
| ATOM | 3007 | 1HH1 | ARG | A | 224 | 5.542  | 61.078 | 21.034 | 1.00 | 0.00 |
| ATOM | 3008 | 2HH1 | ARG | A | 224 | 4.483  | 61.332 | 19.660 | 1.00 | 0.00 |
| ATOM | 3009 | 1HH2 | ARG | A | 224 | 5.838  | 58.669 | 17.815 | 1.00 | 0.00 |
| ATOM | 3010 | 2HH2 | ARG | A | 224 | 4.651  | 59.959 | 17.824 | 1.00 | 0.00 |
| ATOM | 3011 | N    | LYS | A | 225 | 8.343  | 53.622 | 22.225 | 1.00 | 0.00 |
| ATOM | 3012 | CA   | LYS | A | 225 | 7.758  | 52.329 | 22.574 | 1.00 | 0.00 |
| ATOM | 3013 | C    | LYS | A | 225 | 8.777  | 51.382 | 23.228 | 1.00 | 0.00 |
| ATOM | 3014 | O    | LYS | A | 225 | 8.469  | 50.225 | 23.530 | 1.00 | 0.00 |
| ATOM | 3015 | CB   | LYS | A | 225 | 7.160  | 51.673 | 21.329 | 1.00 | 0.00 |
| ATOM | 3016 | CG   | LYS | A | 225 | 5.966  | 52.413 | 20.739 | 1.00 | 0.00 |
| ATOM | 3017 | CD   | LYS | A | 225 | 5.435  | 51.708 | 19.500 | 1.00 | 0.00 |
| ATOM | 3018 | CE   | LYS | A | 225 | 4.264  | 52.465 | 18.891 | 1.00 | 0.00 |
| ATOM | 3019 | NZ   | LYS | A | 225 | 3.118  | 52.571 | 19.834 | 1.00 | 0.00 |
| ATOM | 3020 | H    | LYS | A | 225 | 8.886  | 53.704 | 21.377 | 1.00 | 0.00 |



PEDF\_P1\_final\_docking\_model.txt

|      |      |      |     |   |     |        |        |        |      |      |
|------|------|------|-----|---|-----|--------|--------|--------|------|------|
| ATOM | 3021 | HA   | LYS | A | 225 | 6.968  | 52.469 | 23.313 | 1.00 | 0.00 |
| ATOM | 3022 | 1HB  | LYS | A | 225 | 7.954  | 51.615 | 20.585 | 1.00 | 0.00 |
| ATOM | 3023 | 2HB  | LYS | A | 225 | 6.856  | 50.665 | 21.613 | 1.00 | 0.00 |
| ATOM | 3024 | 1HG  | LYS | A | 225 | 5.181  | 52.462 | 21.495 | 1.00 | 0.00 |
| ATOM | 3025 | 2HG  | LYS | A | 225 | 6.280  | 53.423 | 20.477 | 1.00 | 0.00 |
| ATOM | 3026 | 1HD  | LYS | A | 225 | 6.242  | 51.636 | 18.769 | 1.00 | 0.00 |
| ATOM | 3027 | 2HD  | LYS | A | 225 | 5.111  | 50.706 | 19.782 | 1.00 | 0.00 |
| ATOM | 3028 | 1HE  | LYS | A | 225 | 4.606  | 53.464 | 18.622 | 1.00 | 0.00 |
| ATOM | 3029 | 2HE  | LYS | A | 225 | 3.947  | 51.937 | 17.992 | 1.00 | 0.00 |
| ATOM | 3030 | 1HZ  | LYS | A | 225 | 2.364  | 53.078 | 19.393 | 1.00 | 0.00 |
| ATOM | 3031 | 2HZ  | LYS | A | 225 | 2.800  | 51.644 | 20.083 | 1.00 | 0.00 |
| ATOM | 3032 | 3HZ  | LYS | A | 225 | 3.412  | 53.061 | 20.667 | 1.00 | 0.00 |
| ATOM | 3033 | N    | THR | A | 226 | 9.988  | 51.885 | 23.447 | 1.00 | 0.00 |
| ATOM | 3034 | CA   | THR | A | 226 | 11.054 | 51.104 | 24.068 | 1.00 | 0.00 |
| ATOM | 3035 | C    | THR | A | 226 | 10.978 | 51.255 | 25.585 | 1.00 | 0.00 |
| ATOM | 3036 | O    | THR | A | 226 | 11.093 | 52.360 | 26.103 | 1.00 | 0.00 |
| ATOM | 3037 | CB   | THR | A | 226 | 12.448 | 51.537 | 23.577 | 1.00 | 0.00 |
| ATOM | 3038 | OG1  | THR | A | 226 | 12.539 | 51.346 | 22.159 | 1.00 | 0.00 |
| ATOM | 3039 | CG2  | THR | A | 226 | 13.533 | 50.723 | 24.265 | 1.00 | 0.00 |
| ATOM | 3040 | H    | THR | A | 226 | 10.173 | 52.839 | 23.173 | 1.00 | 0.00 |
| ATOM | 3041 | HA   | THR | A | 226 | 10.920 | 50.047 | 23.836 | 1.00 | 0.00 |
| ATOM | 3042 | HB   | THR | A | 226 | 12.590 | 52.594 | 23.802 | 1.00 | 0.00 |
| ATOM | 3043 | HG1  | THR | A | 226 | 13.408 | 51.616 | 21.855 | 1.00 | 0.00 |
| ATOM | 3044 | 1HG2 | THR | A | 226 | 14.510 | 51.044 | 23.906 | 1.00 | 0.00 |
| ATOM | 3045 | 2HG2 | THR | A | 226 | 13.473 | 50.876 | 25.343 | 1.00 | 0.00 |
| ATOM | 3046 | 3HG2 | THR | A | 226 | 13.392 | 49.667 | 24.040 | 1.00 | 0.00 |
| ATOM | 3047 | N    | SER | A | 227 | 10.787 | 50.148 | 26.296 | 1.00 | 0.00 |
| ATOM | 3048 | CA   | SER | A | 227 | 10.700 | 50.205 | 27.752 | 1.00 | 0.00 |
| ATOM | 3049 | C    | SER | A | 227 | 11.471 | 49.085 | 28.430 | 1.00 | 0.00 |
| ATOM | 3050 | O    | SER | A | 227 | 11.703 | 48.040 | 27.834 | 1.00 | 0.00 |
| ATOM | 3051 | CB   | SER | A | 227 | 9.246  | 50.165 | 28.181 | 1.00 | 0.00 |
| ATOM | 3052 | OG   | SER | A | 227 | 8.630  | 48.954 | 27.840 | 1.00 | 0.00 |
| ATOM | 3053 | H    | SER | A | 227 | 10.700 | 49.255 | 25.833 | 1.00 | 0.00 |
| ATOM | 3054 | HA   | SER | A | 227 | 11.026 | 51.159 | 28.168 | 1.00 | 0.00 |
| ATOM | 3055 | 1HB  | SER | A | 227 | 9.199  | 50.295 | 29.262 | 1.00 | 0.00 |
| ATOM | 3056 | 2HB  | SER | A | 227 | 8.716  | 50.982 | 27.695 | 1.00 | 0.00 |
| ATOM | 3057 | HG   | SER | A | 227 | 9.089  | 48.229 | 28.271 | 1.00 | 0.00 |
| ATOM | 3058 | N    | LEU | A | 228 | 11.864 | 49.306 | 29.680 | 1.00 | 0.00 |
| ATOM | 3059 | CA   | LEU | A | 228 | 12.580 | 48.283 | 30.425 | 1.00 | 0.00 |
| ATOM | 3060 | C    | LEU | A | 228 | 11.626 | 47.114 | 30.614 | 1.00 | 0.00 |
| ATOM | 3061 | O    | LEU | A | 228 | 10.492 | 47.294 | 31.049 | 1.00 | 0.00 |
| ATOM | 3062 | CB   | LEU | A | 228 | 13.080 | 48.820 | 31.772 | 1.00 | 0.00 |
| ATOM | 3063 | CG   | LEU | A | 228 | 14.156 | 49.910 | 31.681 | 1.00 | 0.00 |
| ATOM | 3064 | CD1  | LEU | A | 228 | 14.473 | 50.447 | 33.070 | 1.00 | 0.00 |
| ATOM | 3065 | CD2  | LEU | A | 228 | 15.404 | 49.339 | 31.026 | 1.00 | 0.00 |
| ATOM | 3066 | H    | LEU | A | 228 | 11.667 | 50.191 | 30.125 | 1.00 | 0.00 |
| ATOM | 3067 | HA   | LEU | A | 228 | 13.441 | 47.947 | 29.849 | 1.00 | 0.00 |
| ATOM | 3068 | 1HB  | LEU | A | 228 | 12.150 | 49.243 | 32.150 | 1.00 | 0.00 |
| ATOM | 3069 | 2HB  | LEU | A | 228 | 13.407 | 48.016 | 32.431 | 1.00 | 0.00 |
| ATOM | 3070 | HG   | LEU | A | 228 | 13.767 | 50.695 | 31.032 | 1.00 | 0.00 |
| ATOM | 3071 | 1HD1 | LEU | A | 228 | 15.238 | 51.221 | 32.996 | 1.00 | 0.00 |
| ATOM | 3072 | 2HD1 | LEU | A | 228 | 13.571 | 50.872 | 33.511 | 1.00 | 0.00 |
| ATOM | 3073 | 3HD1 | LEU | A | 228 | 14.838 | 49.636 | 33.699 | 1.00 | 0.00 |
| ATOM | 3074 | 1HD2 | LEU | A | 228 | 16.168 | 50.115 | 30.961 | 1.00 | 0.00 |
| ATOM | 3075 | 2HD2 | LEU | A | 228 | 15.780 | 48.507 | 31.621 | 1.00 | 0.00 |
| ATOM | 3076 | 3HD2 | LEU | A | 228 | 15.160 | 48.987 | 30.023 | 1.00 | 0.00 |
| ATOM | 3077 | N    | GLU | A | 229 | 12.080 | 45.915 | 30.271 | 1.00 | 0.00 |
| ATOM | 3078 | CA   | GLU | A | 229 | 11.257 | 44.721 | 30.410 | 1.00 | 0.00 |
| ATOM | 3079 | C    | GLU | A | 229 | 12.060 | 43.624 | 31.078 | 1.00 | 0.00 |
| ATOM | 3080 | O    | GLU | A | 229 | 13.255 | 43.780 | 31.313 | 1.00 | 0.00 |
| ATOM | 3081 | CB   | GLU | A | 229 | 10.739 | 44.249 | 29.049 | 1.00 | 0.00 |
| ATOM | 3082 | CG   | GLU | A | 229 | 9.867  | 45.264 | 28.322 | 1.00 | 0.00 |
| ATOM | 3083 | CD   | GLU | A | 229 | 8.550  | 45.453 | 29.022 | 1.00 | 0.00 |

PEDF\_P1\_final\_docking\_model.txt

|      |      |     |     |   |     |        |        |        |      |      |
|------|------|-----|-----|---|-----|--------|--------|--------|------|------|
| ATOM | 3084 | OE1 | GLU | A | 229 | 8.225  | 44.650 | 29.863 | 1.00 | 0.00 |
| ATOM | 3085 | OE2 | GLU | A | 229 | 7.921  | 46.460 | 28.798 | 1.00 | 0.00 |
| ATOM | 3086 | H   | GLU | A | 229 | 13.017 | 45.827 | 29.905 | 1.00 | 0.00 |
| ATOM | 3087 | HA  | GLU | A | 229 | 10.399 | 44.935 | 31.048 | 1.00 | 0.00 |
| ATOM | 3088 | 1HB | GLU | A | 229 | 11.612 | 44.018 | 28.439 | 1.00 | 0.00 |
| ATOM | 3089 | 2HB | GLU | A | 229 | 10.166 | 43.338 | 29.225 | 1.00 | 0.00 |
| ATOM | 3090 | 1HG | GLU | A | 229 | 10.349 | 46.232 | 28.188 | 1.00 | 0.00 |
| ATOM | 3091 | 2HG | GLU | A | 229 | 9.699  | 44.805 | 27.349 | 1.00 | 0.00 |
| ATOM | 3092 | N   | ASP | A | 230 | 11.395 | 42.516 | 31.381 | 1.00 | 0.00 |
| ATOM | 3093 | CA  | ASP | A | 230 | 12.046 | 41.387 | 32.023 | 1.00 | 0.00 |
| ATOM | 3094 | C   | ASP | A | 230 | 12.709 | 40.480 | 31.002 | 1.00 | 0.00 |
| ATOM | 3095 | O   | ASP | A | 230 | 12.124 | 40.161 | 29.971 | 1.00 | 0.00 |
| ATOM | 3096 | CB  | ASP | A | 230 | 11.039 | 40.591 | 32.857 | 1.00 | 0.00 |
| ATOM | 3097 | CG  | ASP | A | 230 | 10.482 | 41.344 | 34.058 | 1.00 | 0.00 |
| ATOM | 3098 | OD1 | ASP | A | 230 | 11.257 | 41.922 | 34.784 | 1.00 | 0.00 |
| ATOM | 3099 | OD2 | ASP | A | 230 | 9.285  | 41.469 | 34.152 | 1.00 | 0.00 |
| ATOM | 3100 | H   | ASP | A | 230 | 10.411 | 42.456 | 31.160 | 1.00 | 0.00 |
| ATOM | 3101 | HA  | ASP | A | 230 | 12.839 | 41.743 | 32.681 | 1.00 | 0.00 |
| ATOM | 3102 | 1HB | ASP | A | 230 | 10.215 | 40.183 | 32.271 | 1.00 | 0.00 |
| ATOM | 3103 | 2HB | ASP | A | 230 | 11.678 | 39.778 | 33.203 | 1.00 | 0.00 |
| ATOM | 3104 | N   | PHE | A | 231 | 13.941 | 40.078 | 31.291 | 1.00 | 0.00 |
| ATOM | 3105 | CA  | PHE | A | 231 | 14.685 | 39.190 | 30.413 | 1.00 | 0.00 |
| ATOM | 3106 | C   | PHE | A | 231 | 15.097 | 38.004 | 31.261 | 1.00 | 0.00 |
| ATOM | 3107 | O   | PHE | A | 231 | 15.858 | 38.150 | 32.216 | 1.00 | 0.00 |
| ATOM | 3108 | CB  | PHE | A | 231 | 15.917 | 39.867 | 29.816 | 1.00 | 0.00 |
| ATOM | 3109 | CG  | PHE | A | 231 | 16.572 | 38.952 | 28.803 | 1.00 | 0.00 |
| ATOM | 3110 | CD1 | PHE | A | 231 | 17.447 | 37.950 | 29.209 | 1.00 | 0.00 |
| ATOM | 3111 | CD2 | PHE | A | 231 | 16.302 | 39.117 | 27.450 | 1.00 | 0.00 |
| ATOM | 3112 | CE1 | PHE | A | 231 | 18.067 | 37.134 | 28.270 | 1.00 | 0.00 |
| ATOM | 3113 | CE2 | PHE | A | 231 | 16.923 | 38.306 | 26.507 | 1.00 | 0.00 |
| ATOM | 3114 | CZ  | PHE | A | 231 | 17.821 | 37.328 | 26.917 | 1.00 | 0.00 |
| ATOM | 3115 | H   | PHE | A | 231 | 14.372 | 40.399 | 32.146 | 1.00 | 0.00 |
| ATOM | 3116 | HA  | PHE | A | 231 | 14.044 | 38.853 | 29.597 | 1.00 | 0.00 |
| ATOM | 3117 | 1HB | PHE | A | 231 | 15.632 | 40.791 | 29.315 | 1.00 | 0.00 |
| ATOM | 3118 | 2HB | PHE | A | 231 | 16.639 | 40.088 | 30.601 | 1.00 | 0.00 |
| ATOM | 3119 | HD1 | PHE | A | 231 | 17.641 | 37.811 | 30.273 | 1.00 | 0.00 |
| ATOM | 3120 | HD2 | PHE | A | 231 | 15.597 | 39.885 | 27.129 | 1.00 | 0.00 |
| ATOM | 3121 | HE1 | PHE | A | 231 | 18.744 | 36.345 | 28.597 | 1.00 | 0.00 |
| ATOM | 3122 | HE2 | PHE | A | 231 | 16.707 | 38.437 | 25.447 | 1.00 | 0.00 |
| ATOM | 3123 | HZ  | PHE | A | 231 | 18.332 | 36.715 | 26.176 | 1.00 | 0.00 |
| ATOM | 3124 | N   | TYR | A | 232 | 14.590 | 36.828 | 30.922 | 1.00 | 0.00 |
| ATOM | 3125 | CA  | TYR | A | 232 | 14.912 | 35.634 | 31.687 | 1.00 | 0.00 |
| ATOM | 3126 | C   | TYR | A | 232 | 16.273 | 35.076 | 31.319 | 1.00 | 0.00 |
| ATOM | 3127 | O   | TYR | A | 232 | 16.427 | 34.450 | 30.275 | 1.00 | 0.00 |
| ATOM | 3128 | CB  | TYR | A | 232 | 13.838 | 34.564 | 31.478 | 1.00 | 0.00 |
| ATOM | 3129 | CG  | TYR | A | 232 | 12.491 | 34.924 | 32.064 | 1.00 | 0.00 |
| ATOM | 3130 | CD1 | TYR | A | 232 | 11.493 | 35.471 | 31.271 | 1.00 | 0.00 |
| ATOM | 3131 | CD2 | TYR | A | 232 | 12.221 | 34.715 | 33.408 | 1.00 | 0.00 |
| ATOM | 3132 | CE1 | TYR | A | 232 | 10.260 | 35.803 | 31.800 | 1.00 | 0.00 |
| ATOM | 3133 | CE2 | TYR | A | 232 | 10.993 | 35.042 | 33.948 | 1.00 | 0.00 |
| ATOM | 3134 | CZ  | TYR | A | 232 | 10.014 | 35.586 | 33.141 | 1.00 | 0.00 |
| ATOM | 3135 | OH  | TYR | A | 232 | 8.789  | 35.913 | 33.674 | 1.00 | 0.00 |
| ATOM | 3136 | H   | TYR | A | 232 | 13.973 | 36.751 | 30.126 | 1.00 | 0.00 |
| ATOM | 3137 | HA  | TYR | A | 232 | 14.961 | 35.877 | 32.749 | 1.00 | 0.00 |
| ATOM | 3138 | 1HB | TYR | A | 232 | 13.738 | 34.412 | 30.402 | 1.00 | 0.00 |
| ATOM | 3139 | 2HB | TYR | A | 232 | 14.203 | 33.647 | 31.942 | 1.00 | 0.00 |
| ATOM | 3140 | HD1 | TYR | A | 232 | 11.694 | 35.639 | 30.213 | 1.00 | 0.00 |
| ATOM | 3141 | HD2 | TYR | A | 232 | 12.998 | 34.286 | 34.040 | 1.00 | 0.00 |
| ATOM | 3142 | HE1 | TYR | A | 232 | 9.486  | 36.232 | 31.166 | 1.00 | 0.00 |
| ATOM | 3143 | HE2 | TYR | A | 232 | 10.800 | 34.871 | 35.008 | 1.00 | 0.00 |
| ATOM | 3144 | HH  | TYR | A | 232 | 8.725  | 35.721 | 34.613 | 1.00 | 0.00 |
| ATOM | 3145 | N   | LEU | A | 233 | 17.262 | 35.316 | 32.179 | 1.00 | 0.00 |
| ATOM | 3146 | CA  | LEU | A | 233 | 18.617 | 34.818 | 31.950 | 1.00 | 0.00 |

PEDF\_P1\_final\_docking\_model.txt

|      |      |      |     |   |     |        |        |        |      |      |
|------|------|------|-----|---|-----|--------|--------|--------|------|------|
| ATOM | 3147 | C    | LEU | A | 233 | 18.595 | 33.296 | 32.056 | 1.00 | 0.00 |
| ATOM | 3148 | O    | LEU | A | 233 | 19.464 | 32.606 | 31.524 | 1.00 | 0.00 |
| ATOM | 3149 | CB   | LEU | A | 233 | 19.604 | 35.426 | 32.954 | 1.00 | 0.00 |
| ATOM | 3150 | CG   | LEU | A | 233 | 19.838 | 36.935 | 32.808 | 1.00 | 0.00 |
| ATOM | 3151 | CD1  | LEU | A | 233 | 20.728 | 37.437 | 33.937 | 1.00 | 0.00 |
| ATOM | 3152 | CD2  | LEU | A | 233 | 20.471 | 37.222 | 31.454 | 1.00 | 0.00 |
| ATOM | 3153 | H    | LEU | A | 233 | 17.070 | 35.856 | 33.011 | 1.00 | 0.00 |
| ATOM | 3154 | HA   | LEU | A | 233 | 18.939 | 35.085 | 30.944 | 1.00 | 0.00 |
| ATOM | 3155 | 1HB  | LEU | A | 233 | 19.066 | 35.219 | 33.878 | 1.00 | 0.00 |
| ATOM | 3156 | 2HB  | LEU | A | 233 | 20.554 | 34.892 | 32.960 | 1.00 | 0.00 |
| ATOM | 3157 | HG   | LEU | A | 233 | 18.861 | 37.418 | 32.828 | 1.00 | 0.00 |
| ATOM | 3158 | 1HD1 | LEU | A | 233 | 20.888 | 38.510 | 33.825 | 1.00 | 0.00 |
| ATOM | 3159 | 2HD1 | LEU | A | 233 | 20.245 | 37.242 | 34.895 | 1.00 | 0.00 |
| ATOM | 3160 | 3HD1 | LEU | A | 233 | 21.687 | 36.921 | 33.902 | 1.00 | 0.00 |
| ATOM | 3161 | 1HD2 | LEU | A | 233 | 20.637 | 38.295 | 31.351 | 1.00 | 0.00 |
| ATOM | 3162 | 2HD2 | LEU | A | 233 | 21.425 | 36.699 | 31.380 | 1.00 | 0.00 |
| ATOM | 3163 | 3HD2 | LEU | A | 233 | 19.806 | 36.880 | 30.661 | 1.00 | 0.00 |
| ATOM | 3164 | N    | ASP | A | 234 | 17.583 | 32.788 | 32.750 | 1.00 | 0.00 |
| ATOM | 3165 | CA   | ASP | A | 234 | 17.394 | 31.360 | 32.946 | 1.00 | 0.00 |
| ATOM | 3166 | C    | ASP | A | 234 | 16.201 | 31.123 | 33.859 | 1.00 | 0.00 |
| ATOM | 3167 | O    | ASP | A | 234 | 15.562 | 32.064 | 34.325 | 1.00 | 0.00 |
| ATOM | 3168 | CB   | ASP | A | 234 | 18.654 | 30.717 | 33.532 | 1.00 | 0.00 |
| ATOM | 3169 | CG   | ASP | A | 234 | 19.172 | 31.387 | 34.797 | 1.00 | 0.00 |
| ATOM | 3170 | OD1  | ASP | A | 234 | 18.416 | 31.517 | 35.730 | 1.00 | 0.00 |
| ATOM | 3171 | OD2  | ASP | A | 234 | 20.354 | 31.621 | 34.879 | 1.00 | 0.00 |
| ATOM | 3172 | H    | ASP | A | 234 | 16.920 | 33.432 | 33.156 | 1.00 | 0.00 |
| ATOM | 3173 | HA   | ASP | A | 234 | 17.176 | 30.882 | 31.991 | 1.00 | 0.00 |
| ATOM | 3174 | 1HB  | ASP | A | 234 | 18.554 | 29.645 | 33.704 | 1.00 | 0.00 |
| ATOM | 3175 | 2HB  | ASP | A | 234 | 19.355 | 30.891 | 32.715 | 1.00 | 0.00 |
| ATOM | 3176 | N    | GLU | A | 235 | 15.900 | 29.858 | 34.102 | 1.00 | 0.00 |
| ATOM | 3177 | CA   | GLU | A | 235 | 14.775 | 29.475 | 34.933 | 1.00 | 0.00 |
| ATOM | 3178 | C    | GLU | A | 235 | 14.757 | 30.024 | 36.367 | 1.00 | 0.00 |
| ATOM | 3179 | O    | GLU | A | 235 | 13.689 | 30.112 | 36.974 | 1.00 | 0.00 |
| ATOM | 3180 | CB   | GLU | A | 235 | 14.705 | 27.947 | 34.983 | 1.00 | 0.00 |
| ATOM | 3181 | CG   | GLU | A | 235 | 14.264 | 27.295 | 33.680 | 1.00 | 0.00 |
| ATOM | 3182 | CD   | GLU | A | 235 | 14.314 | 25.796 | 33.775 | 1.00 | 0.00 |
| ATOM | 3183 | OE1  | GLU | A | 235 | 14.748 | 25.298 | 34.785 | 1.00 | 0.00 |
| ATOM | 3184 | OE2  | GLU | A | 235 | 13.815 | 25.147 | 32.885 | 1.00 | 0.00 |
| ATOM | 3185 | H    | GLU | A | 235 | 16.477 | 29.137 | 33.692 | 1.00 | 0.00 |
| ATOM | 3186 | HA   | GLU | A | 235 | 13.851 | 29.870 | 34.510 | 1.00 | 0.00 |
| ATOM | 3187 | 1HB  | GLU | A | 235 | 15.701 | 27.591 | 35.247 | 1.00 | 0.00 |
| ATOM | 3188 | 2HB  | GLU | A | 235 | 14.003 | 27.686 | 35.775 | 1.00 | 0.00 |
| ATOM | 3189 | 1HG  | GLU | A | 235 | 13.271 | 27.605 | 33.354 | 1.00 | 0.00 |
| ATOM | 3190 | 2HG  | GLU | A | 235 | 15.005 | 27.638 | 32.958 | 1.00 | 0.00 |
| ATOM | 3191 | N    | GLU | A | 236 | 15.916 | 30.395 | 36.911 | 1.00 | 0.00 |
| ATOM | 3192 | CA   | GLU | A | 236 | 15.966 | 30.937 | 38.272 | 1.00 | 0.00 |
| ATOM | 3193 | C    | GLU | A | 236 | 16.268 | 32.457 | 38.343 | 1.00 | 0.00 |
| ATOM | 3194 | O    | GLU | A | 236 | 15.928 | 33.100 | 39.328 | 1.00 | 0.00 |
| ATOM | 3195 | CB   | GLU | A | 236 | 17.010 | 30.167 | 39.084 | 1.00 | 0.00 |
| ATOM | 3196 | CG   | GLU | A | 236 | 16.710 | 28.684 | 39.248 | 1.00 | 0.00 |
| ATOM | 3197 | CD   | GLU | A | 236 | 17.784 | 27.994 | 40.042 | 1.00 | 0.00 |
| ATOM | 3198 | OE1  | GLU | A | 236 | 18.720 | 28.649 | 40.434 | 1.00 | 0.00 |
| ATOM | 3199 | OE2  | GLU | A | 236 | 17.615 | 26.839 | 40.355 | 1.00 | 0.00 |
| ATOM | 3200 | H    | GLU | A | 236 | 16.774 | 30.305 | 36.386 | 1.00 | 0.00 |
| ATOM | 3201 | HA   | GLU | A | 236 | 14.991 | 30.831 | 38.748 | 1.00 | 0.00 |
| ATOM | 3202 | 1HB  | GLU | A | 236 | 17.965 | 30.290 | 38.573 | 1.00 | 0.00 |
| ATOM | 3203 | 2HB  | GLU | A | 236 | 17.059 | 30.637 | 40.067 | 1.00 | 0.00 |
| ATOM | 3204 | 1HG  | GLU | A | 236 | 15.739 | 28.485 | 39.701 | 1.00 | 0.00 |
| ATOM | 3205 | 2HG  | GLU | A | 236 | 16.716 | 28.307 | 38.226 | 1.00 | 0.00 |
| ATOM | 3206 | N    | ARG | A | 237 | 16.872 | 33.044 | 37.312 | 1.00 | 0.00 |
| ATOM | 3207 | CA   | ARG | A | 237 | 17.215 | 34.479 | 37.353 | 1.00 | 0.00 |
| ATOM | 3208 | C    | ARG | A | 237 | 16.581 | 35.382 | 36.287 | 1.00 | 0.00 |
| ATOM | 3209 | O    | ARG | A | 237 | 16.500 | 35.022 | 35.110 | 1.00 | 0.00 |

PEDF\_P1\_final\_docking\_model.txt

|      |      |      |     |   |     |        |        |        |      |      |
|------|------|------|-----|---|-----|--------|--------|--------|------|------|
| ATOM | 3210 | CB   | ARG | A | 237 | 18.725 | 34.664 | 37.349 | 1.00 | 0.00 |
| ATOM | 3211 | CG   | ARG | A | 237 | 19.192 | 36.111 | 37.345 | 1.00 | 0.00 |
| ATOM | 3212 | CD   | ARG | A | 237 | 20.666 | 36.279 | 37.433 | 1.00 | 0.00 |
| ATOM | 3213 | NE   | ARG | A | 237 | 21.118 | 37.660 | 37.388 | 1.00 | 0.00 |
| ATOM | 3214 | CZ   | ARG | A | 237 | 22.398 | 38.051 | 37.542 | 1.00 | 0.00 |
| ATOM | 3215 | NH1  | ARG | A | 237 | 23.349 | 37.177 | 37.789 | 1.00 | 0.00 |
| ATOM | 3216 | NH2  | ARG | A | 237 | 22.671 | 39.342 | 37.462 | 1.00 | 0.00 |
| ATOM | 3217 | H    | ARG | A | 237 | 17.101 | 32.507 | 36.488 | 1.00 | 0.00 |
| ATOM | 3218 | HA   | ARG | A | 237 | 16.857 | 34.917 | 38.285 | 1.00 | 0.00 |
| ATOM | 3219 | 1HB  | ARG | A | 237 | 19.109 | 34.165 | 38.237 | 1.00 | 0.00 |
| ATOM | 3220 | 2HB  | ARG | A | 237 | 19.104 | 34.162 | 36.458 | 1.00 | 0.00 |
| ATOM | 3221 | 1HG  | ARG | A | 237 | 18.856 | 36.582 | 36.421 | 1.00 | 0.00 |
| ATOM | 3222 | 2HG  | ARG | A | 237 | 18.743 | 36.622 | 38.197 | 1.00 | 0.00 |
| ATOM | 3223 | 1HD  | ARG | A | 237 | 21.015 | 35.852 | 38.373 | 1.00 | 0.00 |
| ATOM | 3224 | 2HD  | ARG | A | 237 | 21.132 | 35.754 | 36.601 | 1.00 | 0.00 |
| ATOM | 3225 | HE   | ARG | A | 237 | 20.587 | 38.508 | 37.242 | 1.00 | 0.00 |
| ATOM | 3226 | 1HH1 | ARG | A | 237 | 23.121 | 36.195 | 37.864 | 1.00 | 0.00 |
| ATOM | 3227 | 2HH1 | ARG | A | 237 | 24.302 | 37.490 | 37.901 | 1.00 | 0.00 |
| ATOM | 3228 | 1HH2 | ARG | A | 237 | 21.926 | 40.002 | 37.289 | 1.00 | 0.00 |
| ATOM | 3229 | 2HH2 | ARG | A | 237 | 23.621 | 39.662 | 37.574 | 1.00 | 0.00 |
| ATOM | 3230 | N    | THR | A | 238 | 16.166 | 36.576 | 36.706 | 1.00 | 0.00 |
| ATOM | 3231 | CA   | THR | A | 238 | 15.549 | 37.544 | 35.799 | 1.00 | 0.00 |
| ATOM | 3232 | C    | THR | A | 238 | 16.170 | 38.924 | 35.947 | 1.00 | 0.00 |
| ATOM | 3233 | O    | THR | A | 238 | 16.631 | 39.287 | 37.021 | 1.00 | 0.00 |
| ATOM | 3234 | CB   | THR | A | 238 | 14.031 | 37.653 | 36.036 | 1.00 | 0.00 |
| ATOM | 3235 | OG1  | THR | A | 238 | 13.425 | 36.365 | 35.873 | 1.00 | 0.00 |
| ATOM | 3236 | CG2  | THR | A | 238 | 13.407 | 38.631 | 35.053 | 1.00 | 0.00 |
| ATOM | 3237 | H    | THR | A | 238 | 16.282 | 36.818 | 37.680 | 1.00 | 0.00 |
| ATOM | 3238 | HA   | THR | A | 238 | 15.720 | 37.242 | 34.765 | 1.00 | 0.00 |
| ATOM | 3239 | HB   | THR | A | 238 | 13.856 | 38.001 | 37.054 | 1.00 | 0.00 |
| ATOM | 3240 | HG1  | THR | A | 238 | 12.479 | 36.435 | 36.022 | 1.00 | 0.00 |
| ATOM | 3241 | 1HG2 | THR | A | 238 | 12.335 | 38.695 | 35.236 | 1.00 | 0.00 |
| ATOM | 3242 | 2HG2 | THR | A | 238 | 13.858 | 39.615 | 35.182 | 1.00 | 0.00 |
| ATOM | 3243 | 3HG2 | THR | A | 238 | 13.581 | 38.283 | 34.035 | 1.00 | 0.00 |
| ATOM | 3244 | N    | VAL | A | 239 | 16.184 | 39.690 | 34.864 | 1.00 | 0.00 |
| ATOM | 3245 | CA   | VAL | A | 239 | 16.748 | 41.037 | 34.882 | 1.00 | 0.00 |
| ATOM | 3246 | C    | VAL | A | 239 | 15.903 | 41.944 | 34.005 | 1.00 | 0.00 |
| ATOM | 3247 | O    | VAL | A | 239 | 15.005 | 41.478 | 33.300 | 1.00 | 0.00 |
| ATOM | 3248 | CB   | VAL | A | 239 | 18.208 | 41.063 | 34.392 | 1.00 | 0.00 |
| ATOM | 3249 | CG1  | VAL | A | 239 | 19.093 | 40.232 | 35.309 | 1.00 | 0.00 |
| ATOM | 3250 | CG2  | VAL | A | 239 | 18.299 | 40.554 | 32.962 | 1.00 | 0.00 |
| ATOM | 3251 | H    | VAL | A | 239 | 15.794 | 39.331 | 34.004 | 1.00 | 0.00 |
| ATOM | 3252 | HA   | VAL | A | 239 | 16.717 | 41.467 | 35.884 | 1.00 | 0.00 |
| ATOM | 3253 | HB   | VAL | A | 239 | 18.561 | 42.094 | 34.384 | 1.00 | 0.00 |
| ATOM | 3254 | 1HG1 | VAL | A | 239 | 20.121 | 40.262 | 34.948 | 1.00 | 0.00 |
| ATOM | 3255 | 2HG1 | VAL | A | 239 | 19.052 | 40.638 | 36.320 | 1.00 | 0.00 |
| ATOM | 3256 | 3HG1 | VAL | A | 239 | 18.741 | 39.200 | 35.317 | 1.00 | 0.00 |
| ATOM | 3257 | 1HG2 | VAL | A | 239 | 19.337 | 40.580 | 32.631 | 1.00 | 0.00 |
| ATOM | 3258 | 2HG2 | VAL | A | 239 | 17.929 | 39.530 | 32.917 | 1.00 | 0.00 |
| ATOM | 3259 | 3HG2 | VAL | A | 239 | 17.696 | 41.187 | 32.311 | 1.00 | 0.00 |
| ATOM | 3260 | N    | ARG | A | 240 | 16.185 | 43.241 | 34.048 | 1.00 | 0.00 |
| ATOM | 3261 | CA   | ARG | A | 240 | 15.432 | 44.176 | 33.233 | 1.00 | 0.00 |
| ATOM | 3262 | C    | ARG | A | 240 | 16.346 | 44.856 | 32.231 | 1.00 | 0.00 |
| ATOM | 3263 | O    | ARG | A | 240 | 17.337 | 45.494 | 32.601 | 1.00 | 0.00 |
| ATOM | 3264 | CB   | ARG | A | 240 | 14.663 | 45.187 | 34.070 | 1.00 | 0.00 |
| ATOM | 3265 | CG   | ARG | A | 240 | 13.461 | 44.622 | 34.811 | 1.00 | 0.00 |
| ATOM | 3266 | CD   | ARG | A | 240 | 12.769 | 45.599 | 35.690 | 1.00 | 0.00 |
| ATOM | 3267 | NE   | ARG | A | 240 | 11.701 | 45.031 | 36.498 | 1.00 | 0.00 |
| ATOM | 3268 | CZ   | ARG | A | 240 | 10.433 | 44.859 | 36.079 | 1.00 | 0.00 |
| ATOM | 3269 | NH1  | ARG | A | 240 | 10.058 | 45.242 | 34.878 | 1.00 | 0.00 |
| ATOM | 3270 | NH2  | ARG | A | 240 | 9.566  | 44.316 | 36.916 | 1.00 | 0.00 |
| ATOM | 3271 | H    | ARG | A | 240 | 16.922 | 43.590 | 34.644 | 1.00 | 0.00 |
| ATOM | 3272 | HA   | ARG | A | 240 | 14.673 | 43.640 | 32.662 | 1.00 | 0.00 |

PEDF\_P1\_final\_docking\_model.txt

|      |      |      |     |   |     |        |        |        |      |      |
|------|------|------|-----|---|-----|--------|--------|--------|------|------|
| ATOM | 3273 | 1HB  | ARG | A | 240 | 15.365 | 45.604 | 34.791 | 1.00 | 0.00 |
| ATOM | 3274 | 2HB  | ARG | A | 240 | 14.329 | 45.973 | 33.393 | 1.00 | 0.00 |
| ATOM | 3275 | 1HG  | ARG | A | 240 | 12.740 | 44.261 | 34.077 | 1.00 | 0.00 |
| ATOM | 3276 | 2HG  | ARG | A | 240 | 13.796 | 43.789 | 35.430 | 1.00 | 0.00 |
| ATOM | 3277 | 1HD  | ARG | A | 240 | 13.496 | 46.038 | 36.372 | 1.00 | 0.00 |
| ATOM | 3278 | 2HD  | ARG | A | 240 | 12.330 | 46.382 | 35.073 | 1.00 | 0.00 |
| ATOM | 3279 | HE   | ARG | A | 240 | 11.725 | 44.690 | 37.450 | 1.00 | 0.00 |
| ATOM | 3280 | 1HH1 | ARG | A | 240 | 10.729 | 45.672 | 34.256 | 1.00 | 0.00 |
| ATOM | 3281 | 2HH1 | ARG | A | 240 | 9.103  | 45.105 | 34.583 | 1.00 | 0.00 |
| ATOM | 3282 | 1HH2 | ARG | A | 240 | 9.866  | 44.043 | 37.842 | 1.00 | 0.00 |
| ATOM | 3283 | 2HH2 | ARG | A | 240 | 8.609  | 44.176 | 36.628 | 1.00 | 0.00 |
| ATOM | 3284 | N    | VAL | A | 241 | 16.009 | 44.706 | 30.957 | 1.00 | 0.00 |
| ATOM | 3285 | CA   | VAL | A | 241 | 16.789 | 45.314 | 29.898 | 1.00 | 0.00 |
| ATOM | 3286 | C    | VAL | A | 241 | 15.839 | 46.075 | 28.982 | 1.00 | 0.00 |
| ATOM | 3287 | O    | VAL | A | 241 | 14.684 | 45.694 | 28.818 | 1.00 | 0.00 |
| ATOM | 3288 | CB   | VAL | A | 241 | 17.564 | 44.246 | 29.106 | 1.00 | 0.00 |
| ATOM | 3289 | CG1  | VAL | A | 241 | 18.512 | 43.452 | 30.003 | 1.00 | 0.00 |
| ATOM | 3290 | CG2  | VAL | A | 241 | 16.628 | 43.324 | 28.330 | 1.00 | 0.00 |
| ATOM | 3291 | H    | VAL | A | 241 | 15.195 | 44.159 | 30.716 | 1.00 | 0.00 |
| ATOM | 3292 | HA   | VAL | A | 241 | 17.495 | 46.045 | 30.295 | 1.00 | 0.00 |
| ATOM | 3293 | HB   | VAL | A | 241 | 18.190 | 44.741 | 28.363 | 1.00 | 0.00 |
| ATOM | 3294 | 1HG1 | VAL | A | 241 | 19.041 | 42.708 | 29.406 | 1.00 | 0.00 |
| ATOM | 3295 | 2HG1 | VAL | A | 241 | 19.233 | 44.129 | 30.460 | 1.00 | 0.00 |
| ATOM | 3296 | 3HG1 | VAL | A | 241 | 17.940 | 42.950 | 30.783 | 1.00 | 0.00 |
| ATOM | 3297 | 1HG2 | VAL | A | 241 | 17.214 | 42.585 | 27.784 | 1.00 | 0.00 |
| ATOM | 3298 | 2HG2 | VAL | A | 241 | 15.960 | 42.816 | 29.026 | 1.00 | 0.00 |
| ATOM | 3299 | 3HG2 | VAL | A | 241 | 16.040 | 43.912 | 27.625 | 1.00 | 0.00 |
| ATOM | 3300 | N    | PRO | A | 242 | 16.301 | 47.191 | 28.408 | 1.00 | 0.00 |
| ATOM | 3301 | CA   | PRO | A | 242 | 15.409 | 47.928 | 27.515 | 1.00 | 0.00 |
| ATOM | 3302 | C    | PRO | A | 242 | 15.055 | 47.051 | 26.312 | 1.00 | 0.00 |
| ATOM | 3303 | O    | PRO | A | 242 | 15.932 | 46.457 | 25.685 | 1.00 | 0.00 |
| ATOM | 3304 | CB   | PRO | A | 242 | 16.241 | 49.169 | 27.172 | 1.00 | 0.00 |
| ATOM | 3305 | CG   | PRO | A | 242 | 17.700 | 48.750 | 27.355 | 1.00 | 0.00 |
| ATOM | 3306 | CD   | PRO | A | 242 | 17.630 | 47.778 | 28.526 | 1.00 | 0.00 |
| ATOM | 3307 | HA   | PRO | A | 242 | 14.453 | 48.191 | 27.991 | 1.00 | 0.00 |
| ATOM | 3308 | 1HB  | PRO | A | 242 | 16.060 | 49.503 | 26.140 | 1.00 | 0.00 |
| ATOM | 3309 | 2HB  | PRO | A | 242 | 15.995 | 50.014 | 27.832 | 1.00 | 0.00 |
| ATOM | 3310 | 1HG  | PRO | A | 242 | 18.096 | 48.278 | 26.444 | 1.00 | 0.00 |
| ATOM | 3311 | 2HG  | PRO | A | 242 | 18.339 | 49.619 | 27.571 | 1.00 | 0.00 |
| ATOM | 3312 | 1HD  | PRO | A | 242 | 18.408 | 47.003 | 28.470 | 1.00 | 0.00 |
| ATOM | 3313 | 2HD  | PRO | A | 242 | 17.751 | 48.285 | 29.495 | 1.00 | 0.00 |
| ATOM | 3314 | N    | MET | A | 243 | 13.765 | 46.963 | 26.011 | 1.00 | 0.00 |
| ATOM | 3315 | CA   | MET | A | 243 | 13.278 | 46.159 | 24.900 | 1.00 | 0.00 |
| ATOM | 3316 | C    | MET | A | 243 | 12.639 | 47.034 | 23.854 | 1.00 | 0.00 |
| ATOM | 3317 | O    | MET | A | 243 | 11.852 | 47.925 | 24.167 | 1.00 | 0.00 |
| ATOM | 3318 | CB   | MET | A | 243 | 12.281 | 45.111 | 25.391 | 1.00 | 0.00 |
| ATOM | 3319 | CG   | MET | A | 243 | 12.890 | 44.025 | 26.267 | 1.00 | 0.00 |
| ATOM | 3320 | SD   | MET | A | 243 | 11.872 | 42.537 | 26.338 | 1.00 | 0.00 |
| ATOM | 3321 | CE   | MET | A | 243 | 12.397 | 41.695 | 24.848 | 1.00 | 0.00 |
| ATOM | 3322 | H    | MET | A | 243 | 13.102 | 47.474 | 26.576 | 1.00 | 0.00 |
| ATOM | 3323 | HA   | MET | A | 243 | 14.111 | 45.645 | 24.420 | 1.00 | 0.00 |
| ATOM | 3324 | 1HB  | MET | A | 243 | 11.514 | 45.642 | 25.952 | 1.00 | 0.00 |
| ATOM | 3325 | 2HB  | MET | A | 243 | 11.836 | 44.656 | 24.505 | 1.00 | 0.00 |
| ATOM | 3326 | 1HG  | MET | A | 243 | 13.868 | 43.769 | 25.860 | 1.00 | 0.00 |
| ATOM | 3327 | 2HG  | MET | A | 243 | 13.008 | 44.426 | 27.273 | 1.00 | 0.00 |
| ATOM | 3328 | 1HE  | MET | A | 243 | 11.855 | 40.754 | 24.751 | 1.00 | 0.00 |
| ATOM | 3329 | 2HE  | MET | A | 243 | 12.190 | 42.325 | 23.982 | 1.00 | 0.00 |
| ATOM | 3330 | 3HE  | MET | A | 243 | 13.468 | 41.494 | 24.903 | 1.00 | 0.00 |
| ATOM | 3331 | N    | MET | A | 244 | 12.974 | 46.792 | 22.602 | 1.00 | 0.00 |
| ATOM | 3332 | CA   | MET | A | 244 | 12.350 | 47.566 | 21.559 | 1.00 | 0.00 |
| ATOM | 3333 | C    | MET | A | 244 | 11.046 | 46.835 | 21.285 | 1.00 | 0.00 |
| ATOM | 3334 | O    | MET | A | 244 | 10.912 | 45.646 | 21.597 | 1.00 | 0.00 |
| ATOM | 3335 | CB   | MET | A | 244 | 13.229 | 47.663 | 20.314 | 1.00 | 0.00 |

PEDF\_P1\_final\_docking\_model.txt

|      |      |     |     |   |     |        |        |        |      |      |
|------|------|-----|-----|---|-----|--------|--------|--------|------|------|
| ATOM | 3336 | CG  | MET | A | 244 | 14.493 | 48.492 | 20.498 | 1.00 | 0.00 |
| ATOM | 3337 | SD  | MET | A | 244 | 15.456 | 48.639 | 18.980 | 1.00 | 0.00 |
| ATOM | 3338 | CE  | MET | A | 244 | 16.385 | 47.109 | 19.020 | 1.00 | 0.00 |
| ATOM | 3339 | H   | MET | A | 244 | 13.651 | 46.085 | 22.352 | 1.00 | 0.00 |
| ATOM | 3340 | HA  | MET | A | 244 | 12.161 | 48.580 | 21.911 | 1.00 | 0.00 |
| ATOM | 3341 | 1HB | MET | A | 244 | 13.500 | 46.646 | 20.036 | 1.00 | 0.00 |
| ATOM | 3342 | 2HB | MET | A | 244 | 12.617 | 48.105 | 19.526 | 1.00 | 0.00 |
| ATOM | 3343 | 1HG | MET | A | 244 | 14.200 | 49.487 | 20.834 | 1.00 | 0.00 |
| ATOM | 3344 | 2HG | MET | A | 244 | 15.103 | 48.015 | 21.264 | 1.00 | 0.00 |
| ATOM | 3345 | 1HE | MET | A | 244 | 17.031 | 47.052 | 18.143 | 1.00 | 0.00 |
| ATOM | 3346 | 2HE | MET | A | 244 | 16.996 | 47.078 | 19.924 | 1.00 | 0.00 |
| ATOM | 3347 | 3HE | MET | A | 244 | 15.696 | 46.265 | 19.019 | 1.00 | 0.00 |
| ATOM | 3348 | N   | SER | A | 245 | 10.078 | 47.545 | 20.723 | 1.00 | 0.00 |
| ATOM | 3349 | CA  | SER | A | 245 | 8.782  | 46.947 | 20.482 | 1.00 | 0.00 |
| ATOM | 3350 | C   | SER | A | 245 | 8.126  | 47.357 | 19.177 | 1.00 | 0.00 |
| ATOM | 3351 | O   | SER | A | 245 | 8.353  | 48.451 | 18.653 | 1.00 | 0.00 |
| ATOM | 3352 | CB  | SER | A | 245 | 7.861  | 47.280 | 21.640 | 1.00 | 0.00 |
| ATOM | 3353 | OG  | SER | A | 245 | 8.339  | 46.772 | 22.855 | 1.00 | 0.00 |
| ATOM | 3354 | H   | SER | A | 245 | 10.233 | 48.507 | 20.458 | 1.00 | 0.00 |
| ATOM | 3355 | HA  | SER | A | 245 | 8.796  | 45.857 | 20.510 | 1.00 | 0.00 |
| ATOM | 3356 | 1HB | SER | A | 245 | 7.777  | 48.363 | 21.717 | 1.00 | 0.00 |
| ATOM | 3357 | 2HB | SER | A | 245 | 6.879  | 46.854 | 21.439 | 1.00 | 0.00 |
| ATOM | 3358 | HG  | SER | A | 245 | 9.022  | 47.353 | 23.198 | 1.00 | 0.00 |
| ATOM | 3359 | N   | ASP | A | 246 | 7.319  | 46.444 | 18.660 | 1.00 | 0.00 |
| ATOM | 3360 | CA  | ASP | A | 246 | 6.561  | 46.660 | 17.449 | 1.00 | 0.00 |
| ATOM | 3361 | C   | ASP | A | 246 | 5.474  | 45.610 | 17.511 | 1.00 | 0.00 |
| ATOM | 3362 | O   | ASP | A | 246 | 5.711  | 44.446 | 17.194 | 1.00 | 0.00 |
| ATOM | 3363 | CB  | ASP | A | 246 | 7.418  | 46.524 | 16.188 | 1.00 | 0.00 |
| ATOM | 3364 | CG  | ASP | A | 246 | 6.686  | 46.847 | 14.892 | 1.00 | 0.00 |
| ATOM | 3365 | OD1 | ASP | A | 246 | 5.491  | 47.020 | 14.935 | 1.00 | 0.00 |
| ATOM | 3366 | OD2 | ASP | A | 246 | 7.342  | 47.073 | 13.904 | 1.00 | 0.00 |
| ATOM | 3367 | H   | ASP | A | 246 | 7.236  | 45.560 | 19.141 | 1.00 | 0.00 |
| ATOM | 3368 | HA  | ASP | A | 246 | 6.138  | 47.665 | 17.452 | 1.00 | 0.00 |
| ATOM | 3369 | 1HB | ASP | A | 246 | 8.347  | 47.091 | 16.231 | 1.00 | 0.00 |
| ATOM | 3370 | 2HB | ASP | A | 246 | 7.640  | 45.457 | 16.222 | 1.00 | 0.00 |
| ATOM | 3371 | N   | PRO | A | 247 | 4.265  | 46.009 | 17.939 | 1.00 | 0.00 |
| ATOM | 3372 | CA  | PRO | A | 247 | 3.112  | 45.112 | 18.064 | 1.00 | 0.00 |
| ATOM | 3373 | C   | PRO | A | 247 | 2.530  | 44.640 | 16.735 | 1.00 | 0.00 |
| ATOM | 3374 | O   | PRO | A | 247 | 1.757  | 43.681 | 16.696 | 1.00 | 0.00 |
| ATOM | 3375 | CB  | PRO | A | 247 | 2.098  | 45.948 | 18.851 | 1.00 | 0.00 |
| ATOM | 3376 | CG  | PRO | A | 247 | 2.465  | 47.360 | 18.547 | 1.00 | 0.00 |
| ATOM | 3377 | CD  | PRO | A | 247 | 3.965  | 47.364 | 18.418 | 1.00 | 0.00 |
| ATOM | 3378 | HA  | PRO | A | 247 | 3.360  | 44.169 | 18.572 | 1.00 | 0.00 |
| ATOM | 3379 | 1HB | PRO | A | 247 | 1.066  | 45.729 | 18.539 | 1.00 | 0.00 |
| ATOM | 3380 | 2HB | PRO | A | 247 | 2.159  | 45.745 | 19.930 | 1.00 | 0.00 |
| ATOM | 3381 | 1HG | PRO | A | 247 | 1.987  | 47.704 | 17.617 | 1.00 | 0.00 |
| ATOM | 3382 | 2HG | PRO | A | 247 | 2.135  | 48.039 | 19.348 | 1.00 | 0.00 |
| ATOM | 3383 | 1HD | PRO | A | 247 | 4.319  | 48.119 | 17.700 | 1.00 | 0.00 |
| ATOM | 3384 | 2HD | PRO | A | 247 | 4.464  | 47.573 | 19.375 | 1.00 | 0.00 |
| ATOM | 3385 | N   | LYS | A | 248 | 2.901  | 45.308 | 15.648 | 1.00 | 0.00 |
| ATOM | 3386 | CA  | LYS | A | 248 | 2.405  | 44.928 | 14.331 | 1.00 | 0.00 |
| ATOM | 3387 | C   | LYS | A | 248 | 3.573  | 44.838 | 13.353 | 1.00 | 0.00 |
| ATOM | 3388 | O   | LYS | A | 248 | 3.579  | 45.487 | 12.306 | 1.00 | 0.00 |
| ATOM | 3389 | CB  | LYS | A | 248 | 1.361  | 45.927 | 13.831 | 1.00 | 0.00 |
| ATOM | 3390 | CG  | LYS | A | 248 | 0.087  | 45.976 | 14.664 | 1.00 | 0.00 |
| ATOM | 3391 | CD  | LYS | A | 248 | -0.933 | 46.930 | 14.060 | 1.00 | 0.00 |
| ATOM | 3392 | CE  | LYS | A | 248 | -2.167 | 47.052 | 14.942 | 1.00 | 0.00 |
| ATOM | 3393 | NZ  | LYS | A | 248 | -3.174 | 47.984 | 14.364 | 1.00 | 0.00 |
| ATOM | 3394 | H   | LYS | A | 248 | 3.535  | 46.090 | 15.728 | 1.00 | 0.00 |
| ATOM | 3395 | HA  | LYS | A | 248 | 1.941  | 43.942 | 14.382 | 1.00 | 0.00 |
| ATOM | 3396 | 1HB | LYS | A | 248 | 1.833  | 46.910 | 13.832 | 1.00 | 0.00 |
| ATOM | 3397 | 2HB | LYS | A | 248 | 1.113  | 45.646 | 12.807 | 1.00 | 0.00 |
| ATOM | 3398 | 1HG | LYS | A | 248 | -0.336 | 44.972 | 14.710 | 1.00 | 0.00 |

PEDF\_P1\_final\_docking\_model.txt

|      |      |      |     |   |     |        |        |        |      |      |
|------|------|------|-----|---|-----|--------|--------|--------|------|------|
| ATOM | 3399 | 2HG  | LYS | A | 248 | 0.344  | 46.308 | 15.670 | 1.00 | 0.00 |
| ATOM | 3400 | 1HD  | LYS | A | 248 | -0.468 | 47.910 | 13.947 | 1.00 | 0.00 |
| ATOM | 3401 | 2HD  | LYS | A | 248 | -1.224 | 46.552 | 13.080 | 1.00 | 0.00 |
| ATOM | 3402 | 1HE  | LYS | A | 248 | -2.609 | 46.063 | 15.051 | 1.00 | 0.00 |
| ATOM | 3403 | 2HE  | LYS | A | 248 | -1.853 | 47.419 | 15.919 | 1.00 | 0.00 |
| ATOM | 3404 | 1HZ  | LYS | A | 248 | -3.974 | 48.037 | 14.978 | 1.00 | 0.00 |
| ATOM | 3405 | 2HZ  | LYS | A | 248 | -2.765 | 48.902 | 14.263 | 1.00 | 0.00 |
| ATOM | 3406 | 3HZ  | LYS | A | 248 | -3.465 | 47.644 | 13.459 | 1.00 | 0.00 |
| ATOM | 3407 | N    | ALA | A | 249 | 4.563  | 44.024 | 13.714 | 1.00 | 0.00 |
| ATOM | 3408 | CA   | ALA | A | 249 | 5.761  | 43.817 | 12.903 | 1.00 | 0.00 |
| ATOM | 3409 | C    | ALA | A | 249 | 5.542  | 42.784 | 11.805 | 1.00 | 0.00 |
| ATOM | 3410 | O    | ALA | A | 249 | 4.847  | 41.786 | 11.997 | 1.00 | 0.00 |
| ATOM | 3411 | CB   | ALA | A | 249 | 6.933  | 43.369 | 13.776 | 1.00 | 0.00 |
| ATOM | 3412 | H    | ALA | A | 249 | 4.472  | 43.532 | 14.591 | 1.00 | 0.00 |
| ATOM | 3413 | HA   | ALA | A | 249 | 6.013  | 44.754 | 12.407 | 1.00 | 0.00 |
| ATOM | 3414 | 1HB  | ALA | A | 249 | 7.814  | 43.221 | 13.152 | 1.00 | 0.00 |
| ATOM | 3415 | 2HB  | ALA | A | 249 | 7.143  | 44.133 | 14.524 | 1.00 | 0.00 |
| ATOM | 3416 | 3HB  | ALA | A | 249 | 6.680  | 42.434 | 14.273 | 1.00 | 0.00 |
| ATOM | 3417 | N    | VAL | A | 250 | 6.136  | 43.029 | 10.646 | 1.00 | 0.00 |
| ATOM | 3418 | CA   | VAL | A | 250 | 6.011  | 42.103 | 9.539  | 1.00 | 0.00 |
| ATOM | 3419 | C    | VAL | A | 250 | 7.375  | 41.474 | 9.289  | 1.00 | 0.00 |
| ATOM | 3420 | O    | VAL | A | 250 | 8.305  | 42.133 | 8.821  | 1.00 | 0.00 |
| ATOM | 3421 | CB   | VAL | A | 250 | 5.506  | 42.791 | 8.257  | 1.00 | 0.00 |
| ATOM | 3422 | CG1  | VAL | A | 250 | 5.415  | 41.790 | 7.115  | 1.00 | 0.00 |
| ATOM | 3423 | CG2  | VAL | A | 250 | 4.154  | 43.444 | 8.500  | 1.00 | 0.00 |
| ATOM | 3424 | H    | VAL | A | 250 | 6.684  | 43.869 | 10.525 | 1.00 | 0.00 |
| ATOM | 3425 | HA   | VAL | A | 250 | 5.328  | 41.287 | 9.779  | 1.00 | 0.00 |
| ATOM | 3426 | HB   | VAL | A | 250 | 6.198  | 43.589 | 7.987  | 1.00 | 0.00 |
| ATOM | 3427 | 1HG1 | VAL | A | 250 | 5.057  | 42.294 | 6.217  | 1.00 | 0.00 |
| ATOM | 3428 | 2HG1 | VAL | A | 250 | 6.401  | 41.366 | 6.924  | 1.00 | 0.00 |
| ATOM | 3429 | 3HG1 | VAL | A | 250 | 4.722  | 40.993 | 7.384  | 1.00 | 0.00 |
| ATOM | 3430 | 1HG2 | VAL | A | 250 | 3.812  | 43.926 | 7.585  | 1.00 | 0.00 |
| ATOM | 3431 | 2HG2 | VAL | A | 250 | 3.433  | 42.684 | 8.801  | 1.00 | 0.00 |
| ATOM | 3432 | 3HG2 | VAL | A | 250 | 4.246  | 44.190 | 9.290  | 1.00 | 0.00 |
| ATOM | 3433 | N    | LEU | A | 251 | 7.479  | 40.193 | 9.628  | 1.00 | 0.00 |
| ATOM | 3434 | CA   | LEU | A | 251 | 8.714  | 39.435 | 9.484  | 1.00 | 0.00 |
| ATOM | 3435 | C    | LEU | A | 251 | 8.433  | 38.039 | 8.919  | 1.00 | 0.00 |
| ATOM | 3436 | O    | LEU | A | 251 | 7.278  | 37.632 | 8.798  | 1.00 | 0.00 |
| ATOM | 3437 | CB   | LEU | A | 251 | 9.434  | 39.336 | 10.835 | 1.00 | 0.00 |
| ATOM | 3438 | CG   | LEU | A | 251 | 8.593  | 38.765 | 11.983 | 1.00 | 0.00 |
| ATOM | 3439 | CD1  | LEU | A | 251 | 8.543  | 37.246 | 11.888 | 1.00 | 0.00 |
| ATOM | 3440 | CD2  | LEU | A | 251 | 9.185  | 39.203 | 13.314 | 1.00 | 0.00 |
| ATOM | 3441 | H    | LEU | A | 251 | 6.660  | 39.734 | 10.001 | 1.00 | 0.00 |
| ATOM | 3442 | HA   | LEU | A | 251 | 9.368  | 39.935 | 8.770  | 1.00 | 0.00 |
| ATOM | 3443 | 1HB  | LEU | A | 251 | 10.222 | 38.635 | 10.564 | 1.00 | 0.00 |
| ATOM | 3444 | 2HB  | LEU | A | 251 | 9.879  | 40.288 | 11.125 | 1.00 | 0.00 |
| ATOM | 3445 | HG   | LEU | A | 251 | 7.596  | 39.200 | 11.902 | 1.00 | 0.00 |
| ATOM | 3446 | 1HD1 | LEU | A | 251 | 7.943  | 36.850 | 12.708 | 1.00 | 0.00 |
| ATOM | 3447 | 2HD1 | LEU | A | 251 | 8.095  | 36.955 | 10.938 | 1.00 | 0.00 |
| ATOM | 3448 | 3HD1 | LEU | A | 251 | 9.553  | 36.844 | 11.952 | 1.00 | 0.00 |
| ATOM | 3449 | 1HD2 | LEU | A | 251 | 8.585  | 38.797 | 14.130 | 1.00 | 0.00 |
| ATOM | 3450 | 2HD2 | LEU | A | 251 | 10.208 | 38.835 | 13.397 | 1.00 | 0.00 |
| ATOM | 3451 | 3HD2 | LEU | A | 251 | 9.185  | 40.292 | 13.372 | 1.00 | 0.00 |
| ATOM | 3452 | N    | ARG | A | 252 | 9.485  | 37.315 | 8.551  | 1.00 | 0.00 |
| ATOM | 3453 | CA   | ARG | A | 252 | 9.315  | 35.966 | 8.025  | 1.00 | 0.00 |
| ATOM | 3454 | C    | ARG | A | 252 | 9.532  | 34.982 | 9.183  | 1.00 | 0.00 |
| ATOM | 3455 | O    | ARG | A | 252 | 10.576 | 34.966 | 9.823  | 1.00 | 0.00 |
| ATOM | 3456 | CB   | ARG | A | 252 | 10.214 | 35.673 | 6.833  | 1.00 | 0.00 |
| ATOM | 3457 | CG   | ARG | A | 252 | 9.790  | 36.338 | 5.533  | 1.00 | 0.00 |
| ATOM | 3458 | CD   | ARG | A | 252 | 10.630 | 35.983 | 4.361  | 1.00 | 0.00 |
| ATOM | 3459 | NE   | ARG | A | 252 | 10.532 | 34.592 | 3.949  | 1.00 | 0.00 |
| ATOM | 3460 | CZ   | ARG | A | 252 | 11.400 | 33.975 | 3.123  | 1.00 | 0.00 |
| ATOM | 3461 | NH1  | ARG | A | 252 | 12.407 | 34.630 | 2.588  | 1.00 | 0.00 |

PEDF\_P1\_final\_docking\_model.txt

|      |      |      |     |   |     |        |        |        |      |      |
|------|------|------|-----|---|-----|--------|--------|--------|------|------|
| ATOM | 3462 | NH2  | ARG | A | 252 | 11.197 | 32.699 | 2.844  | 1.00 | 0.00 |
| ATOM | 3463 | H    | ARG | A | 252 | 10.416 | 37.697 | 8.634  | 1.00 | 0.00 |
| ATOM | 3464 | HA   | ARG | A | 252 | 8.299  | 35.842 | 7.648  | 1.00 | 0.00 |
| ATOM | 3465 | 1HB  | ARG | A | 252 | 11.215 | 36.011 | 7.099  | 1.00 | 0.00 |
| ATOM | 3466 | 2HB  | ARG | A | 252 | 10.220 | 34.592 | 6.697  | 1.00 | 0.00 |
| ATOM | 3467 | 1HG  | ARG | A | 252 | 8.763  | 36.045 | 5.312  | 1.00 | 0.00 |
| ATOM | 3468 | 2HG  | ARG | A | 252 | 9.838  | 37.420 | 5.666  | 1.00 | 0.00 |
| ATOM | 3469 | 1HD  | ARG | A | 252 | 10.330 | 36.596 | 3.511  | 1.00 | 0.00 |
| ATOM | 3470 | 2HD  | ARG | A | 252 | 11.674 | 36.180 | 4.600  | 1.00 | 0.00 |
| ATOM | 3471 | HE   | ARG | A | 252 | 9.843  | 33.893 | 4.196  | 1.00 | 0.00 |
| ATOM | 3472 | 1HH1 | ARG | A | 252 | 12.537 | 35.609 | 2.797  | 1.00 | 0.00 |
| ATOM | 3473 | 2HH1 | ARG | A | 252 | 13.046 | 34.150 | 1.971  | 1.00 | 0.00 |
| ATOM | 3474 | 1HH2 | ARG | A | 252 | 10.408 | 32.216 | 3.250  | 1.00 | 0.00 |
| ATOM | 3475 | 2HH2 | ARG | A | 252 | 11.832 | 32.214 | 2.227  | 1.00 | 0.00 |
| ATOM | 3476 | N    | TYR | A | 253 | 8.529  | 34.156 | 9.443  | 1.00 | 0.00 |
| ATOM | 3477 | CA   | TYR | A | 253 | 8.558  | 33.239 | 10.575 | 1.00 | 0.00 |
| ATOM | 3478 | C    | TYR | A | 253 | 8.487  | 31.749 | 10.230 | 1.00 | 0.00 |
| ATOM | 3479 | O    | TYR | A | 253 | 8.184  | 31.373 | 9.096  | 1.00 | 0.00 |
| ATOM | 3480 | CB   | TYR | A | 253 | 7.444  | 33.717 | 11.524 | 1.00 | 0.00 |
| ATOM | 3481 | CG   | TYR | A | 253 | 7.204  | 32.799 | 12.698 | 1.00 | 0.00 |
| ATOM | 3482 | CD1  | TYR | A | 253 | 6.136  | 31.908 | 12.654 | 1.00 | 0.00 |
| ATOM | 3483 | CD2  | TYR | A | 253 | 8.048  | 32.825 | 13.801 | 1.00 | 0.00 |
| ATOM | 3484 | CE1  | TYR | A | 253 | 5.938  | 31.010 | 13.693 | 1.00 | 0.00 |
| ATOM | 3485 | CE2  | TYR | A | 253 | 7.844  | 31.928 | 14.843 | 1.00 | 0.00 |
| ATOM | 3486 | CZ   | TYR | A | 253 | 6.796  | 31.016 | 14.783 | 1.00 | 0.00 |
| ATOM | 3487 | OH   | TYR | A | 253 | 6.602  | 30.110 | 15.805 | 1.00 | 0.00 |
| ATOM | 3488 | H    | TYR | A | 253 | 7.721  | 34.164 | 8.837  | 1.00 | 0.00 |
| ATOM | 3489 | HA   | TYR | A | 253 | 9.507  | 33.334 | 11.104 | 1.00 | 0.00 |
| ATOM | 3490 | 1HB  | TYR | A | 253 | 7.732  | 34.704 | 11.888 | 1.00 | 0.00 |
| ATOM | 3491 | 2HB  | TYR | A | 253 | 6.531  | 33.799 | 10.934 | 1.00 | 0.00 |
| ATOM | 3492 | HD1  | TYR | A | 253 | 5.465  | 31.933 | 11.795 | 1.00 | 0.00 |
| ATOM | 3493 | HD2  | TYR | A | 253 | 8.858  | 33.554 | 13.827 | 1.00 | 0.00 |
| ATOM | 3494 | HE1  | TYR | A | 253 | 5.103  | 30.310 | 13.664 | 1.00 | 0.00 |
| ATOM | 3495 | HE2  | TYR | A | 253 | 8.506  | 31.939 | 15.709 | 1.00 | 0.00 |
| ATOM | 3496 | HH   | TYR | A | 253 | 7.248  | 30.196 | 16.510 | 1.00 | 0.00 |
| ATOM | 3497 | N    | GLY | A | 254 | 8.781  | 30.912 | 11.224 | 1.00 | 0.00 |
| ATOM | 3498 | CA   | GLY | A | 254 | 8.736  | 29.474 | 11.045 | 1.00 | 0.00 |
| ATOM | 3499 | C    | GLY | A | 254 | 9.160  | 28.754 | 12.309 | 1.00 | 0.00 |
| ATOM | 3500 | O    | GLY | A | 254 | 10.138 | 29.150 | 12.942 | 1.00 | 0.00 |
| ATOM | 3501 | H    | GLY | A | 254 | 9.042  | 31.288 | 12.125 | 1.00 | 0.00 |
| ATOM | 3502 | 1HA  | GLY | A | 254 | 7.718  | 29.178 | 10.791 | 1.00 | 0.00 |
| ATOM | 3503 | 2HA  | GLY | A | 254 | 9.407  | 29.195 | 10.234 | 1.00 | 0.00 |
| ATOM | 3504 | N    | LEU | A | 255 | 8.431  | 27.704 | 12.686 | 1.00 | 0.00 |
| ATOM | 3505 | CA   | LEU | A | 255 | 8.752  | 26.922 | 13.883 | 1.00 | 0.00 |
| ATOM | 3506 | C    | LEU | A | 255 | 9.361  | 25.572 | 13.475 | 1.00 | 0.00 |
| ATOM | 3507 | O    | LEU | A | 255 | 8.773  | 24.844 | 12.684 | 1.00 | 0.00 |
| ATOM | 3508 | CB   | LEU | A | 255 | 7.435  | 26.771 | 14.668 | 1.00 | 0.00 |
| ATOM | 3509 | CG   | LEU | A | 255 | 7.383  | 25.950 | 15.968 | 1.00 | 0.00 |
| ATOM | 3510 | CD1  | LEU | A | 255 | 7.234  | 24.442 | 15.750 | 1.00 | 0.00 |
| ATOM | 3511 | CD2  | LEU | A | 255 | 8.513  | 26.303 | 16.926 | 1.00 | 0.00 |
| ATOM | 3512 | H    | LEU | A | 255 | 7.632  | 27.441 | 12.126 | 1.00 | 0.00 |
| ATOM | 3513 | HA   | LEU | A | 255 | 9.500  | 27.450 | 14.474 | 1.00 | 0.00 |
| ATOM | 3514 | 1HB  | LEU | A | 255 | 7.260  | 27.815 | 14.923 | 1.00 | 0.00 |
| ATOM | 3515 | 2HB  | LEU | A | 255 | 6.625  | 26.412 | 14.033 | 1.00 | 0.00 |
| ATOM | 3516 | HG   | LEU | A | 255 | 6.454  | 26.208 | 16.477 | 1.00 | 0.00 |
| ATOM | 3517 | 1HD1 | LEU | A | 255 | 7.205  | 23.935 | 16.715 | 1.00 | 0.00 |
| ATOM | 3518 | 2HD1 | LEU | A | 255 | 6.309  | 24.242 | 15.209 | 1.00 | 0.00 |
| ATOM | 3519 | 3HD1 | LEU | A | 255 | 8.081  | 24.073 | 15.172 | 1.00 | 0.00 |
| ATOM | 3520 | 1HD2 | LEU | A | 255 | 8.428  | 25.695 | 17.827 | 1.00 | 0.00 |
| ATOM | 3521 | 2HD2 | LEU | A | 255 | 9.472  | 26.109 | 16.445 | 1.00 | 0.00 |
| ATOM | 3522 | 3HD2 | LEU | A | 255 | 8.448  | 27.358 | 17.193 | 1.00 | 0.00 |
| ATOM | 3523 | N    | ASP | A | 256 | 10.542 | 25.248 | 14.001 | 1.00 | 0.00 |
| ATOM | 3524 | CA   | ASP | A | 256 | 11.209 | 23.974 | 13.690 | 1.00 | 0.00 |



PEDF\_P1\_final\_docking\_model.txt

|      |      |      |     |   |     |        |        |        |      |      |
|------|------|------|-----|---|-----|--------|--------|--------|------|------|
| ATOM | 3525 | C    | ASP | A | 256 | 10.955 | 23.042 | 14.864 | 1.00 | 0.00 |
| ATOM | 3526 | O    | ASP | A | 256 | 11.579 | 23.176 | 15.915 | 1.00 | 0.00 |
| ATOM | 3527 | CB   | ASP | A | 256 | 12.710 | 24.157 | 13.452 | 1.00 | 0.00 |
| ATOM | 3528 | CG   | ASP | A | 256 | 13.451 | 22.876 | 13.093 | 1.00 | 0.00 |
| ATOM | 3529 | OD1  | ASP | A | 256 | 12.840 | 21.834 | 13.115 | 1.00 | 0.00 |
| ATOM | 3530 | OD2  | ASP | A | 256 | 14.571 | 22.966 | 12.649 | 1.00 | 0.00 |
| ATOM | 3531 | H    | ASP | A | 256 | 10.991 | 25.897 | 14.631 | 1.00 | 0.00 |
| ATOM | 3532 | HA   | ASP | A | 256 | 10.777 | 23.542 | 12.787 | 1.00 | 0.00 |
| ATOM | 3533 | 1HB  | ASP | A | 256 | 12.943 | 24.929 | 12.718 | 1.00 | 0.00 |
| ATOM | 3534 | 2HB  | ASP | A | 256 | 13.021 | 24.491 | 14.443 | 1.00 | 0.00 |
| ATOM | 3535 | N    | SER | A | 257 | 10.036 | 22.102 | 14.679 | 1.00 | 0.00 |
| ATOM | 3536 | CA   | SER | A | 257 | 9.672  | 21.158 | 15.728 | 1.00 | 0.00 |
| ATOM | 3537 | C    | SER | A | 257 | 10.845 | 20.359 | 16.275 | 1.00 | 0.00 |
| ATOM | 3538 | O    | SER | A | 257 | 10.933 | 20.132 | 17.478 | 1.00 | 0.00 |
| ATOM | 3539 | CB   | SER | A | 257 | 8.609  | 20.211 | 15.205 | 1.00 | 0.00 |
| ATOM | 3540 | OG   | SER | A | 257 | 9.086  | 19.411 | 14.158 | 1.00 | 0.00 |
| ATOM | 3541 | H    | SER | A | 257 | 9.576  | 22.042 | 13.782 | 1.00 | 0.00 |
| ATOM | 3542 | HA   | SER | A | 257 | 9.161  | 21.624 | 16.572 | 1.00 | 0.00 |
| ATOM | 3543 | 1HB  | SER | A | 257 | 8.283  | 19.568 | 16.023 | 1.00 | 0.00 |
| ATOM | 3544 | 2HB  | SER | A | 257 | 7.765  | 20.798 | 14.847 | 1.00 | 0.00 |
| ATOM | 3545 | HG   | SER | A | 257 | 8.385  | 18.828 | 13.857 | 1.00 | 0.00 |
| ATOM | 3546 | N    | ASP | A | 258 | 11.741 | 19.934 | 15.393 | 1.00 | 0.00 |
| ATOM | 3547 | CA   | ASP | A | 258 | 12.901 | 19.144 | 15.792 | 1.00 | 0.00 |
| ATOM | 3548 | C    | ASP | A | 258 | 13.859 | 19.920 | 16.696 | 1.00 | 0.00 |
| ATOM | 3549 | O    | ASP | A | 258 | 14.182 | 19.474 | 17.799 | 1.00 | 0.00 |
| ATOM | 3550 | CB   | ASP | A | 258 | 13.648 | 18.646 | 14.552 | 1.00 | 0.00 |
| ATOM | 3551 | CG   | ASP | A | 258 | 12.922 | 17.555 | 13.777 | 1.00 | 0.00 |
| ATOM | 3552 | OD1  | ASP | A | 258 | 11.962 | 17.028 | 14.288 | 1.00 | 0.00 |
| ATOM | 3553 | OD2  | ASP | A | 258 | 13.232 | 17.366 | 12.625 | 1.00 | 0.00 |
| ATOM | 3554 | H    | ASP | A | 258 | 11.615 | 20.165 | 14.418 | 1.00 | 0.00 |
| ATOM | 3555 | HA   | ASP | A | 258 | 12.578 | 18.283 | 16.378 | 1.00 | 0.00 |
| ATOM | 3556 | 1HB  | ASP | A | 258 | 13.937 | 19.445 | 13.869 | 1.00 | 0.00 |
| ATOM | 3557 | 2HB  | ASP | A | 258 | 14.538 | 18.226 | 15.021 | 1.00 | 0.00 |
| ATOM | 3558 | N    | LEU | A | 259 | 14.327 | 21.069 | 16.217 | 1.00 | 0.00 |
| ATOM | 3559 | CA   | LEU | A | 259 | 15.240 | 21.898 | 16.995 | 1.00 | 0.00 |
| ATOM | 3560 | C    | LEU | A | 259 | 14.515 | 22.440 | 18.211 | 1.00 | 0.00 |
| ATOM | 3561 | O    | LEU | A | 259 | 15.142 | 22.834 | 19.195 | 1.00 | 0.00 |
| ATOM | 3562 | CB   | LEU | A | 259 | 15.799 | 23.043 | 16.141 | 1.00 | 0.00 |
| ATOM | 3563 | CG   | LEU | A | 259 | 16.723 | 22.612 | 14.995 | 1.00 | 0.00 |
| ATOM | 3564 | CD1  | LEU | A | 259 | 17.272 | 23.839 | 14.278 | 1.00 | 0.00 |
| ATOM | 3565 | CD2  | LEU | A | 259 | 17.855 | 21.759 | 15.548 | 1.00 | 0.00 |
| ATOM | 3566 | H    | LEU | A | 259 | 14.047 | 21.376 | 15.297 | 1.00 | 0.00 |
| ATOM | 3567 | HA   | LEU | A | 259 | 16.072 | 21.291 | 17.350 | 1.00 | 0.00 |
| ATOM | 3568 | 1HB  | LEU | A | 259 | 14.866 | 23.438 | 15.741 | 1.00 | 0.00 |
| ATOM | 3569 | 2HB  | LEU | A | 259 | 16.282 | 23.805 | 16.754 | 1.00 | 0.00 |
| ATOM | 3570 | HG   | LEU | A | 259 | 16.134 | 21.990 | 14.321 | 1.00 | 0.00 |
| ATOM | 3571 | 1HD1 | LEU | A | 259 | 17.927 | 23.523 | 13.466 | 1.00 | 0.00 |
| ATOM | 3572 | 2HD1 | LEU | A | 259 | 16.446 | 24.422 | 13.871 | 1.00 | 0.00 |
| ATOM | 3573 | 3HD1 | LEU | A | 259 | 17.836 | 24.449 | 14.982 | 1.00 | 0.00 |
| ATOM | 3574 | 1HD2 | LEU | A | 259 | 18.510 | 21.453 | 14.732 | 1.00 | 0.00 |
| ATOM | 3575 | 2HD2 | LEU | A | 259 | 18.425 | 22.337 | 16.275 | 1.00 | 0.00 |
| ATOM | 3576 | 3HD2 | LEU | A | 259 | 17.441 | 20.874 | 16.031 | 1.00 | 0.00 |
| ATOM | 3577 | N    | SER | A | 260 | 13.190 | 22.464 | 18.128 | 1.00 | 0.00 |
| ATOM | 3578 | CA   | SER | A | 260 | 12.365 | 22.964 | 19.212 | 1.00 | 0.00 |
| ATOM | 3579 | C    | SER | A | 260 | 12.598 | 24.468 | 19.405 | 1.00 | 0.00 |
| ATOM | 3580 | O    | SER | A | 260 | 12.849 | 24.934 | 20.523 | 1.00 | 0.00 |
| ATOM | 3581 | CB   | SER | A | 260 | 12.662 | 22.202 | 20.489 | 1.00 | 0.00 |
| ATOM | 3582 | OG   | SER | A | 260 | 12.406 | 20.831 | 20.356 | 1.00 | 0.00 |
| ATOM | 3583 | H    | SER | A | 260 | 12.745 | 22.125 | 17.287 | 1.00 | 0.00 |
| ATOM | 3584 | HA   | SER | A | 260 | 11.302 | 22.756 | 19.079 | 1.00 | 0.00 |
| ATOM | 3585 | 1HB  | SER | A | 260 | 13.713 | 22.344 | 20.742 | 1.00 | 0.00 |
| ATOM | 3586 | 2HB  | SER | A | 260 | 12.040 | 22.603 | 21.288 | 1.00 | 0.00 |
| ATOM | 3587 | HG   | SER | A | 260 | 12.957 | 20.470 | 19.657 | 1.00 | 0.00 |

PEDF\_P1\_final\_docking\_model.txt

|      |      |      |     |   |     |        |        |        |      |      |
|------|------|------|-----|---|-----|--------|--------|--------|------|------|
| ATOM | 3588 | N    | CYS | A | 261 | 12.520 | 25.225 | 18.310 | 1.00 | 0.00 |
| ATOM | 3589 | CA   | CYS | A | 261 | 12.725 | 26.672 | 18.380 | 1.00 | 0.00 |
| ATOM | 3590 | C    | CYS | A | 261 | 11.964 | 27.464 | 17.316 | 1.00 | 0.00 |
| ATOM | 3591 | O    | CYS | A | 261 | 11.554 | 26.917 | 16.292 | 1.00 | 0.00 |
| ATOM | 3592 | CB   | CYS | A | 261 | 14.231 | 26.791 | 18.146 | 1.00 | 0.00 |
| ATOM | 3593 | SG   | CYS | A | 261 | 14.783 | 26.229 | 16.518 | 1.00 | 0.00 |
| ATOM | 3594 | H    | CYS | A | 261 | 12.317 | 24.800 | 17.417 | 1.00 | 0.00 |
| ATOM | 3595 | HA   | CYS | A | 261 | 12.482 | 27.098 | 19.354 | 1.00 | 0.00 |
| ATOM | 3596 | 1HB  | CYS | A | 261 | 14.545 | 27.832 | 18.228 | 1.00 | 0.00 |
| ATOM | 3597 | 2HB  | CYS | A | 261 | 14.774 | 26.189 | 18.874 | 1.00 | 0.00 |
| ATOM | 3598 | HG   | CYS | A | 261 | 15.939 | 26.885 | 16.529 | 1.00 | 0.00 |
| ATOM | 3599 | N    | LYS | A | 262 | 11.791 | 28.759 | 17.579 | 1.00 | 0.00 |
| ATOM | 3600 | CA   | LYS | A | 262 | 11.090 | 29.677 | 16.677 | 1.00 | 0.00 |
| ATOM | 3601 | C    | LYS | A | 262 | 12.076 | 30.555 | 15.914 | 1.00 | 0.00 |
| ATOM | 3602 | O    | LYS | A | 262 | 12.846 | 31.302 | 16.517 | 1.00 | 0.00 |
| ATOM | 3603 | CB   | LYS | A | 262 | 10.104 | 30.550 | 17.456 | 1.00 | 0.00 |
| ATOM | 3604 | CG   | LYS | A | 262 | 9.063  | 29.770 | 18.247 | 1.00 | 0.00 |
| ATOM | 3605 | CD   | LYS | A | 262 | 8.169  | 30.701 | 19.053 | 1.00 | 0.00 |
| ATOM | 3606 | CE   | LYS | A | 262 | 7.112  | 29.924 | 19.824 | 1.00 | 0.00 |
| ATOM | 3607 | NZ   | LYS | A | 262 | 6.207  | 30.825 | 20.588 | 1.00 | 0.00 |
| ATOM | 3608 | H    | LYS | A | 262 | 12.167 | 29.113 | 18.447 | 1.00 | 0.00 |
| ATOM | 3609 | HA   | LYS | A | 262 | 10.535 | 29.108 | 15.930 | 1.00 | 0.00 |
| ATOM | 3610 | 1HB  | LYS | A | 262 | 10.692 | 31.165 | 18.138 | 1.00 | 0.00 |
| ATOM | 3611 | 2HB  | LYS | A | 262 | 9.603  | 31.191 | 16.731 | 1.00 | 0.00 |
| ATOM | 3612 | 1HG  | LYS | A | 262 | 8.454  | 29.197 | 17.547 | 1.00 | 0.00 |
| ATOM | 3613 | 2HG  | LYS | A | 262 | 9.579  | 29.087 | 18.921 | 1.00 | 0.00 |
| ATOM | 3614 | 1HD  | LYS | A | 262 | 8.792  | 31.260 | 19.753 | 1.00 | 0.00 |
| ATOM | 3615 | 2HD  | LYS | A | 262 | 7.682  | 31.394 | 18.368 | 1.00 | 0.00 |
| ATOM | 3616 | 1HE  | LYS | A | 262 | 6.528  | 29.343 | 19.111 | 1.00 | 0.00 |
| ATOM | 3617 | 2HE  | LYS | A | 262 | 7.619  | 29.249 | 20.513 | 1.00 | 0.00 |
| ATOM | 3618 | 1HZ  | LYS | A | 262 | 5.522  | 30.272 | 21.084 | 1.00 | 0.00 |
| ATOM | 3619 | 2HZ  | LYS | A | 262 | 6.747  | 31.364 | 21.250 | 1.00 | 0.00 |
| ATOM | 3620 | 3HZ  | LYS | A | 262 | 5.736  | 31.450 | 19.949 | 1.00 | 0.00 |
| ATOM | 3621 | N    | ILE | A | 263 | 12.036 | 30.468 | 14.586 | 1.00 | 0.00 |
| ATOM | 3622 | CA   | ILE | A | 263 | 12.930 | 31.241 | 13.720 | 1.00 | 0.00 |
| ATOM | 3623 | C    | ILE | A | 263 | 12.233 | 32.449 | 13.082 | 1.00 | 0.00 |
| ATOM | 3624 | O    | ILE | A | 263 | 11.163 | 32.319 | 12.497 | 1.00 | 0.00 |
| ATOM | 3625 | CB   | ILE | A | 263 | 13.517 | 30.360 | 12.602 | 1.00 | 0.00 |
| ATOM | 3626 | CG1  | ILE | A | 263 | 14.218 | 29.137 | 13.200 | 1.00 | 0.00 |
| ATOM | 3627 | CG2  | ILE | A | 263 | 14.481 | 31.163 | 11.743 | 1.00 | 0.00 |
| ATOM | 3628 | CD1  | ILE | A | 263 | 14.617 | 28.100 | 12.174 | 1.00 | 0.00 |
| ATOM | 3629 | H    | ILE | A | 263 | 11.362 | 29.844 | 14.166 | 1.00 | 0.00 |
| ATOM | 3630 | HA   | ILE | A | 263 | 13.738 | 31.684 | 14.300 | 1.00 | 0.00 |
| ATOM | 3631 | HB   | ILE | A | 263 | 12.704 | 29.984 | 11.982 | 1.00 | 0.00 |
| ATOM | 3632 | 1HG1 | ILE | A | 263 | 15.107 | 29.494 | 13.720 | 1.00 | 0.00 |
| ATOM | 3633 | 2HG1 | ILE | A | 263 | 13.532 | 28.690 | 13.920 | 1.00 | 0.00 |
| ATOM | 3634 | 1HG2 | ILE | A | 263 | 14.888 | 30.525 | 10.959 | 1.00 | 0.00 |
| ATOM | 3635 | 2HG2 | ILE | A | 263 | 13.954 | 32.002 | 11.291 | 1.00 | 0.00 |
| ATOM | 3636 | 3HG2 | ILE | A | 263 | 15.296 | 31.539 | 12.363 | 1.00 | 0.00 |
| ATOM | 3637 | 1HD1 | ILE | A | 263 | 15.107 | 27.264 | 12.673 | 1.00 | 0.00 |
| ATOM | 3638 | 2HD1 | ILE | A | 263 | 13.728 | 27.741 | 11.654 | 1.00 | 0.00 |
| ATOM | 3639 | 3HD1 | ILE | A | 263 | 15.303 | 28.544 | 11.455 | 1.00 | 0.00 |
| ATOM | 3640 | N    | ALA | A | 264 | 12.839 | 33.625 | 13.200 | 1.00 | 0.00 |
| ATOM | 3641 | CA   | ALA | A | 264 | 12.273 | 34.831 | 12.606 | 1.00 | 0.00 |
| ATOM | 3642 | C    | ALA | A | 264 | 13.365 | 35.593 | 11.866 | 1.00 | 0.00 |
| ATOM | 3643 | O    | ALA | A | 264 | 14.529 | 35.589 | 12.272 | 1.00 | 0.00 |
| ATOM | 3644 | CB   | ALA | A | 264 | 11.656 | 35.745 | 13.663 | 1.00 | 0.00 |
| ATOM | 3645 | H    | ALA | A | 264 | 13.708 | 33.689 | 13.710 | 1.00 | 0.00 |
| ATOM | 3646 | HA   | ALA | A | 264 | 11.508 | 34.540 | 11.886 | 1.00 | 0.00 |
| ATOM | 3647 | 1HB  | ALA | A | 264 | 11.245 | 36.632 | 13.181 | 1.00 | 0.00 |
| ATOM | 3648 | 2HB  | ALA | A | 264 | 10.859 | 35.214 | 14.184 | 1.00 | 0.00 |
| ATOM | 3649 | 3HB  | ALA | A | 264 | 12.422 | 36.043 | 14.378 | 1.00 | 0.00 |
| ATOM | 3650 | N    | GLN | A | 265 | 12.984 | 36.252 | 10.779 | 1.00 | 0.00 |

PEDF\_P1\_final\_docking\_model.txt

|      |      |      |     |   |     |        |        |        |      |      |
|------|------|------|-----|---|-----|--------|--------|--------|------|------|
| ATOM | 3651 | CA   | GLN | A | 265 | 13.939 | 37.003 | 9.983  | 1.00 | 0.00 |
| ATOM | 3652 | C    | GLN | A | 265 | 13.511 | 38.445 | 9.748  | 1.00 | 0.00 |
| ATOM | 3653 | O    | GLN | A | 265 | 12.432 | 38.709 | 9.214  | 1.00 | 0.00 |
| ATOM | 3654 | CB   | GLN | A | 265 | 14.153 | 36.311 | 8.634  | 1.00 | 0.00 |
| ATOM | 3655 | CG   | GLN | A | 265 | 15.175 | 36.991 | 7.740  | 1.00 | 0.00 |
| ATOM | 3656 | CD   | GLN | A | 265 | 15.273 | 36.341 | 6.374  | 1.00 | 0.00 |
| ATOM | 3657 | OE1  | GLN | A | 265 | 14.462 | 36.609 | 5.483  | 1.00 | 0.00 |
| ATOM | 3658 | NE2  | GLN | A | 265 | 16.267 | 35.477 | 6.200  | 1.00 | 0.00 |
| ATOM | 3659 | H    | GLN | A | 265 | 12.014 | 36.234 | 10.496 | 1.00 | 0.00 |
| ATOM | 3660 | HA   | GLN | A | 265 | 14.888 | 37.066 | 10.515 | 1.00 | 0.00 |
| ATOM | 3661 | 1HB  | GLN | A | 265 | 14.472 | 35.291 | 8.851  | 1.00 | 0.00 |
| ATOM | 3662 | 2HB  | GLN | A | 265 | 13.184 | 36.289 | 8.135  | 1.00 | 0.00 |
| ATOM | 3663 | 1HG  | GLN | A | 265 | 15.210 | 38.071 | 7.600  | 1.00 | 0.00 |
| ATOM | 3664 | 2HG  | GLN | A | 265 | 16.034 | 36.676 | 8.335  | 1.00 | 0.00 |
| ATOM | 3665 | 1HE2 | GLN | A | 265 | 16.382 | 35.016 | 5.320  | 1.00 | 0.00 |
| ATOM | 3666 | 2HE2 | GLN | A | 265 | 16.901 | 35.287 | 6.950  | 1.00 | 0.00 |
| ATOM | 3667 | N    | LEU | A | 266 | 14.372 | 39.377 | 10.145 | 1.00 | 0.00 |
| ATOM | 3668 | CA   | LEU | A | 266 | 14.100 | 40.798 | 9.990  | 1.00 | 0.00 |
| ATOM | 3669 | C    | LEU | A | 266 | 15.097 | 41.359 | 8.992  | 1.00 | 0.00 |
| ATOM | 3670 | O    | LEU | A | 266 | 16.285 | 41.071 | 9.070  | 1.00 | 0.00 |
| ATOM | 3671 | CB   | LEU | A | 266 | 14.192 | 41.530 | 11.335 | 1.00 | 0.00 |
| ATOM | 3672 | CG   | LEU | A | 266 | 13.072 | 41.206 | 12.332 | 1.00 | 0.00 |
| ATOM | 3673 | CD1  | LEU | A | 266 | 13.445 | 41.714 | 13.718 | 1.00 | 0.00 |
| ATOM | 3674 | CD2  | LEU | A | 266 | 11.771 | 41.837 | 11.858 | 1.00 | 0.00 |
| ATOM | 3675 | H    | LEU | A | 266 | 15.242 | 39.086 | 10.567 | 1.00 | 0.00 |
| ATOM | 3676 | HA   | LEU | A | 266 | 13.096 | 40.936 | 9.591  | 1.00 | 0.00 |
| ATOM | 3677 | 1HB  | LEU | A | 266 | 15.138 | 41.126 | 11.692 | 1.00 | 0.00 |
| ATOM | 3678 | 2HB  | LEU | A | 266 | 14.284 | 42.608 | 11.203 | 1.00 | 0.00 |
| ATOM | 3679 | HG   | LEU | A | 266 | 12.938 | 40.124 | 12.329 | 1.00 | 0.00 |
| ATOM | 3680 | 1HD1 | LEU | A | 266 | 12.643 | 41.480 | 14.420 | 1.00 | 0.00 |
| ATOM | 3681 | 2HD1 | LEU | A | 266 | 14.365 | 41.232 | 14.047 | 1.00 | 0.00 |
| ATOM | 3682 | 3HD1 | LEU | A | 266 | 13.591 | 42.793 | 13.683 | 1.00 | 0.00 |
| ATOM | 3683 | 1HD2 | LEU | A | 266 | 10.976 | 41.606 | 12.567 | 1.00 | 0.00 |
| ATOM | 3684 | 2HD2 | LEU | A | 266 | 11.894 | 42.918 | 11.790 | 1.00 | 0.00 |
| ATOM | 3685 | 3HD2 | LEU | A | 266 | 11.509 | 41.439 | 10.878 | 1.00 | 0.00 |
| ATOM | 3686 | N    | PRO | A | 267 | 14.626 | 42.160 | 8.028  | 1.00 | 0.00 |
| ATOM | 3687 | CA   | PRO | A | 267 | 15.536 | 42.736 | 7.035  | 1.00 | 0.00 |
| ATOM | 3688 | C    | PRO | A | 267 | 16.252 | 44.013 | 7.476  | 1.00 | 0.00 |
| ATOM | 3689 | O    | PRO | A | 267 | 15.744 | 44.797 | 8.290  | 1.00 | 0.00 |
| ATOM | 3690 | CB   | PRO | A | 267 | 14.597 | 42.931 | 5.844  | 1.00 | 0.00 |
| ATOM | 3691 | CG   | PRO | A | 267 | 13.243 | 43.261 | 6.472  | 1.00 | 0.00 |
| ATOM | 3692 | CD   | PRO | A | 267 | 13.223 | 42.449 | 7.760  | 1.00 | 0.00 |
| ATOM | 3693 | HA   | PRO | A | 267 | 16.373 | 42.067 | 6.786  | 1.00 | 0.00 |
| ATOM | 3694 | 1HB  | PRO | A | 267 | 14.940 | 43.746 | 5.189  | 1.00 | 0.00 |
| ATOM | 3695 | 2HB  | PRO | A | 267 | 14.537 | 42.024 | 5.225  | 1.00 | 0.00 |
| ATOM | 3696 | 1HG  | PRO | A | 267 | 13.148 | 44.339 | 6.669  | 1.00 | 0.00 |
| ATOM | 3697 | 2HG  | PRO | A | 267 | 12.416 | 42.982 | 5.803  | 1.00 | 0.00 |
| ATOM | 3698 | 1HD  | PRO | A | 267 | 12.777 | 43.007 | 8.597  | 1.00 | 0.00 |
| ATOM | 3699 | 2HD  | PRO | A | 267 | 12.650 | 41.516 | 7.655  | 1.00 | 0.00 |
| ATOM | 3700 | N    | LEU | A | 268 | 17.445 | 44.200 | 6.923  | 1.00 | 0.00 |
| ATOM | 3701 | CA   | LEU | A | 268 | 18.258 | 45.378 | 7.181  | 1.00 | 0.00 |
| ATOM | 3702 | C    | LEU | A | 268 | 18.482 | 46.016 | 5.825  | 1.00 | 0.00 |
| ATOM | 3703 | O    | LEU | A | 268 | 18.402 | 45.355 | 4.791  | 1.00 | 0.00 |
| ATOM | 3704 | CB   | LEU | A | 268 | 19.582 | 45.021 | 7.867  | 1.00 | 0.00 |
| ATOM | 3705 | CG   | LEU | A | 268 | 19.493 | 44.793 | 9.382  | 1.00 | 0.00 |
| ATOM | 3706 | CD1  | LEU | A | 268 | 19.132 | 43.342 | 9.671  | 1.00 | 0.00 |
| ATOM | 3707 | CD2  | LEU | A | 268 | 20.819 | 45.159 | 10.031 | 1.00 | 0.00 |
| ATOM | 3708 | H    | LEU | A | 268 | 17.795 | 43.488 | 6.298  | 1.00 | 0.00 |
| ATOM | 3709 | HA   | LEU | A | 268 | 17.714 | 46.061 | 7.832  | 1.00 | 0.00 |
| ATOM | 3710 | 1HB  | LEU | A | 268 | 19.797 | 44.081 | 7.360  | 1.00 | 0.00 |
| ATOM | 3711 | 2HB  | LEU | A | 268 | 20.364 | 45.744 | 7.637  | 1.00 | 0.00 |
| ATOM | 3712 | HG   | LEU | A | 268 | 18.734 | 45.475 | 9.767  | 1.00 | 0.00 |
| ATOM | 3713 | 1HD1 | LEU | A | 268 | 19.070 | 43.190 | 10.749 | 1.00 | 0.00 |

PEDF\_P1\_final\_docking\_model.txt

|      |      |      |     |   |     |        |        |        |      |      |
|------|------|------|-----|---|-----|--------|--------|--------|------|------|
| ATOM | 3714 | 2HD1 | LEU | A | 268 | 18.169 | 43.109 | 9.217  | 1.00 | 0.00 |
| ATOM | 3715 | 3HD1 | LEU | A | 268 | 19.897 | 42.688 | 9.256  | 1.00 | 0.00 |
| ATOM | 3716 | 1HD2 | LEU | A | 268 | 20.753 | 44.997 | 11.107 | 1.00 | 0.00 |
| ATOM | 3717 | 2HD2 | LEU | A | 268 | 21.612 | 44.535 | 9.617  | 1.00 | 0.00 |
| ATOM | 3718 | 3HD2 | LEU | A | 268 | 21.044 | 46.207 | 9.835  | 1.00 | 0.00 |
| ATOM | 3719 | N    | THR | A | 269 | 18.760 | 47.306 | 5.832  | 1.00 | 0.00 |
| ATOM | 3720 | CA   | THR | A | 269 | 19.017 | 48.036 | 4.605  | 1.00 | 0.00 |
| ATOM | 3721 | C    | THR | A | 269 | 20.357 | 47.571 | 4.027  | 1.00 | 0.00 |
| ATOM | 3722 | O    | THR | A | 269 | 21.270 | 47.195 | 4.766  | 1.00 | 0.00 |
| ATOM | 3723 | CB   | THR | A | 269 | 19.045 | 49.558 | 4.835  | 1.00 | 0.00 |
| ATOM | 3724 | OG1  | THR | A | 269 | 20.070 | 49.883 | 5.782  | 1.00 | 0.00 |
| ATOM | 3725 | CG2  | THR | A | 269 | 17.702 | 50.043 | 5.360  | 1.00 | 0.00 |
| ATOM | 3726 | H    | THR | A | 269 | 18.795 | 47.798 | 6.714  | 1.00 | 0.00 |
| ATOM | 3727 | HA   | THR | A | 269 | 18.241 | 47.812 | 3.873  | 1.00 | 0.00 |
| ATOM | 3728 | HB   | THR | A | 269 | 19.265 | 50.055 | 3.890  | 1.00 | 0.00 |
| ATOM | 3729 | HG1  | THR | A | 269 | 20.302 | 50.811 | 5.697  | 1.00 | 0.00 |
| ATOM | 3730 | 1HG2 | THR | A | 269 | 17.741 | 51.121 | 5.515  | 1.00 | 0.00 |
| ATOM | 3731 | 2HG2 | THR | A | 269 | 16.922 | 49.808 | 4.636  | 1.00 | 0.00 |
| ATOM | 3732 | 3HG2 | THR | A | 269 | 17.482 | 49.548 | 6.304  | 1.00 | 0.00 |
| ATOM | 3733 | N    | GLY | A | 270 | 20.483 | 47.602 | 2.709  | 1.00 | 0.00 |
| ATOM | 3734 | CA   | GLY | A | 270 | 21.732 | 47.183 | 2.099  | 1.00 | 0.00 |
| ATOM | 3735 | C    | GLY | A | 270 | 21.703 | 45.708 | 1.777  | 1.00 | 0.00 |
| ATOM | 3736 | O    | GLY | A | 270 | 22.739 | 45.055 | 1.700  | 1.00 | 0.00 |
| ATOM | 3737 | H    | GLY | A | 270 | 19.726 | 47.912 | 2.117  | 1.00 | 0.00 |
| ATOM | 3738 | 1HA  | GLY | A | 270 | 21.887 | 47.748 | 1.180  | 1.00 | 0.00 |
| ATOM | 3739 | 2HA  | GLY | A | 270 | 22.550 | 47.384 | 2.789  | 1.00 | 0.00 |
| ATOM | 3740 | N    | SER | A | 271 | 20.494 | 45.189 | 1.606  | 1.00 | 0.00 |
| ATOM | 3741 | CA   | SER | A | 271 | 20.269 | 43.796 | 1.277  | 1.00 | 0.00 |
| ATOM | 3742 | C    | SER | A | 271 | 20.872 | 42.820 | 2.291  | 1.00 | 0.00 |
| ATOM | 3743 | O    | SER | A | 271 | 21.695 | 41.971 | 1.943  | 1.00 | 0.00 |
| ATOM | 3744 | CB   | SER | A | 271 | 20.823 | 43.516 | -0.106 | 1.00 | 0.00 |
| ATOM | 3745 | OG   | SER | A | 271 | 20.185 | 44.279 | -1.093 | 1.00 | 0.00 |
| ATOM | 3746 | H    | SER | A | 271 | 19.700 | 45.804 | 1.713  | 1.00 | 0.00 |
| ATOM | 3747 | HA   | SER | A | 271 | 19.215 | 43.545 | 1.153  | 1.00 | 0.00 |
| ATOM | 3748 | 1HB  | SER | A | 271 | 21.887 | 43.750 | -0.109 | 1.00 | 0.00 |
| ATOM | 3749 | 2HB  | SER | A | 271 | 20.684 | 42.459 | -0.331 | 1.00 | 0.00 |
| ATOM | 3750 | HG   | SER | A | 271 | 20.564 | 44.073 | -1.951 | 1.00 | 0.00 |
| ATOM | 3751 | N    | MET | A | 272 | 20.463 | 42.954 | 3.550  | 1.00 | 0.00 |
| ATOM | 3752 | CA   | MET | A | 272 | 20.930 | 42.074 | 4.621  | 1.00 | 0.00 |
| ATOM | 3753 | C    | MET | A | 272 | 19.765 | 41.666 | 5.514  | 1.00 | 0.00 |
| ATOM | 3754 | O    | MET | A | 272 | 18.698 | 42.283 | 5.481  | 1.00 | 0.00 |
| ATOM | 3755 | CB   | MET | A | 272 | 22.017 | 42.762 | 5.445  | 1.00 | 0.00 |
| ATOM | 3756 | CG   | MET | A | 272 | 23.297 | 43.058 | 4.676  | 1.00 | 0.00 |
| ATOM | 3757 | SD   | MET | A | 272 | 24.554 | 43.853 | 5.697  | 1.00 | 0.00 |
| ATOM | 3758 | CE   | MET | A | 272 | 23.754 | 45.412 | 6.064  | 1.00 | 0.00 |
| ATOM | 3759 | H    | MET | A | 272 | 19.807 | 43.690 | 3.769  | 1.00 | 0.00 |
| ATOM | 3760 | HA   | MET | A | 272 | 21.345 | 41.160 | 4.197  | 1.00 | 0.00 |
| ATOM | 3761 | 1HB  | MET | A | 272 | 21.592 | 43.694 | 5.815  | 1.00 | 0.00 |
| ATOM | 3762 | 2HB  | MET | A | 272 | 22.242 | 42.105 | 6.285  | 1.00 | 0.00 |
| ATOM | 3763 | 1HG  | MET | A | 272 | 23.690 | 42.116 | 4.294  | 1.00 | 0.00 |
| ATOM | 3764 | 2HG  | MET | A | 272 | 23.048 | 43.712 | 3.841  | 1.00 | 0.00 |
| ATOM | 3765 | 1HE  | MET | A | 272 | 24.409 | 46.018 | 6.691  | 1.00 | 0.00 |
| ATOM | 3766 | 2HE  | MET | A | 272 | 23.547 | 45.943 | 5.134  | 1.00 | 0.00 |
| ATOM | 3767 | 3HE  | MET | A | 272 | 22.818 | 45.225 | 6.592  | 1.00 | 0.00 |
| ATOM | 3768 | N    | SER | A | 273 | 19.974 | 40.621 | 6.309  | 1.00 | 0.00 |
| ATOM | 3769 | CA   | SER | A | 273 | 18.948 | 40.139 | 7.224  | 1.00 | 0.00 |
| ATOM | 3770 | C    | SER | A | 273 | 19.560 | 39.527 | 8.473  | 1.00 | 0.00 |
| ATOM | 3771 | O    | SER | A | 273 | 20.725 | 39.137 | 8.498  | 1.00 | 0.00 |
| ATOM | 3772 | CB   | SER | A | 273 | 18.059 | 39.129 | 6.525  | 1.00 | 0.00 |
| ATOM | 3773 | OG   | SER | A | 273 | 18.756 | 37.961 | 6.185  | 1.00 | 0.00 |
| ATOM | 3774 | H    | SER | A | 273 | 20.867 | 40.149 | 6.278  | 1.00 | 0.00 |
| ATOM | 3775 | HA   | SER | A | 273 | 18.225 | 40.905 | 7.506  | 1.00 | 0.00 |
| ATOM | 3776 | 1HB  | SER | A | 273 | 17.236 | 38.870 | 7.190  | 1.00 | 0.00 |

PEDF\_P1\_final\_docking\_model.txt

|      |      |      |     |   |     |        |        |        |      |      |
|------|------|------|-----|---|-----|--------|--------|--------|------|------|
| ATOM | 3777 | 2HB  | SER | A | 273 | 17.662 | 39.582 | 5.617  | 1.00 | 0.00 |
| ATOM | 3778 | HG   | SER | A | 273 | 19.353 | 37.726 | 6.899  | 1.00 | 0.00 |
| ATOM | 3779 | N    | ILE | A | 274 | 18.754 | 39.463 | 9.519  | 1.00 | 0.00 |
| ATOM | 3780 | CA   | ILE | A | 274 | 19.172 | 38.876 | 10.771 | 1.00 | 0.00 |
| ATOM | 3781 | C    | ILE | A | 274 | 18.202 | 37.737 | 11.021 | 1.00 | 0.00 |
| ATOM | 3782 | O    | ILE | A | 274 | 16.986 | 37.902 | 10.883 | 1.00 | 0.00 |
| ATOM | 3783 | CB   | ILE | A | 274 | 19.239 | 39.882 | 11.921 | 1.00 | 0.00 |
| ATOM | 3784 | CG1  | ILE | A | 274 | 20.432 | 40.808 | 11.694 | 1.00 | 0.00 |
| ATOM | 3785 | CG2  | ILE | A | 274 | 19.393 | 39.182 | 13.270 | 1.00 | 0.00 |
| ATOM | 3786 | CD1  | ILE | A | 274 | 20.626 | 41.842 | 12.798 | 1.00 | 0.00 |
| ATOM | 3787 | H    | ILE | A | 274 | 17.819 | 39.836 | 9.438  | 1.00 | 0.00 |
| ATOM | 3788 | HA   | ILE | A | 274 | 20.176 | 38.461 | 10.685 | 1.00 | 0.00 |
| ATOM | 3789 | HB   | ILE | A | 274 | 18.323 | 40.472 | 11.931 | 1.00 | 0.00 |
| ATOM | 3790 | 1HG1 | ILE | A | 274 | 21.320 | 40.181 | 11.622 | 1.00 | 0.00 |
| ATOM | 3791 | 2HG1 | ILE | A | 274 | 20.270 | 41.317 | 10.743 | 1.00 | 0.00 |
| ATOM | 3792 | 1HG2 | ILE | A | 274 | 19.438 | 39.927 | 14.064 | 1.00 | 0.00 |
| ATOM | 3793 | 2HG2 | ILE | A | 274 | 18.541 | 38.524 | 13.438 | 1.00 | 0.00 |
| ATOM | 3794 | 3HG2 | ILE | A | 274 | 20.311 | 38.594 | 13.273 | 1.00 | 0.00 |
| ATOM | 3795 | 1HD1 | ILE | A | 274 | 21.492 | 42.464 | 12.567 | 1.00 | 0.00 |
| ATOM | 3796 | 2HD1 | ILE | A | 274 | 19.738 | 42.470 | 12.869 | 1.00 | 0.00 |
| ATOM | 3797 | 3HD1 | ILE | A | 274 | 20.788 | 41.335 | 13.748 | 1.00 | 0.00 |
| ATOM | 3798 | N    | ILE | A | 275 | 18.741 | 36.574 | 11.356 | 1.00 | 0.00 |
| ATOM | 3799 | CA   | ILE | A | 275 | 17.903 | 35.424 | 11.635 | 1.00 | 0.00 |
| ATOM | 3800 | C    | ILE | A | 275 | 18.008 | 35.090 | 13.117 | 1.00 | 0.00 |
| ATOM | 3801 | O    | ILE | A | 275 | 19.096 | 34.848 | 13.628 | 1.00 | 0.00 |
| ATOM | 3802 | CB   | ILE | A | 275 | 18.302 | 34.198 | 10.793 | 1.00 | 0.00 |
| ATOM | 3803 | CG1  | ILE | A | 275 | 18.162 | 34.507 | 9.300  | 1.00 | 0.00 |
| ATOM | 3804 | CG2  | ILE | A | 275 | 17.455 | 32.994 | 11.173 | 1.00 | 0.00 |
| ATOM | 3805 | CD1  | ILE | A | 275 | 18.732 | 33.436 | 8.399  | 1.00 | 0.00 |
| ATOM | 3806 | H    | ILE | A | 275 | 19.744 | 36.479 | 11.420 | 1.00 | 0.00 |
| ATOM | 3807 | HA   | ILE | A | 275 | 16.855 | 35.658 | 11.450 | 1.00 | 0.00 |
| ATOM | 3808 | HB   | ILE | A | 275 | 19.353 | 33.973 | 10.970 | 1.00 | 0.00 |
| ATOM | 3809 | 1HG1 | ILE | A | 275 | 17.099 | 34.629 | 9.093  | 1.00 | 0.00 |
| ATOM | 3810 | 2HG1 | ILE | A | 275 | 18.677 | 35.450 | 9.115  | 1.00 | 0.00 |
| ATOM | 3811 | 1HG2 | ILE | A | 275 | 17.749 | 32.136 | 10.568 | 1.00 | 0.00 |
| ATOM | 3812 | 2HG2 | ILE | A | 275 | 17.603 | 32.762 | 12.227 | 1.00 | 0.00 |
| ATOM | 3813 | 3HG2 | ILE | A | 275 | 16.403 | 33.218 | 10.995 | 1.00 | 0.00 |
| ATOM | 3814 | 1HD1 | ILE | A | 275 | 18.596 | 33.726 | 7.357  | 1.00 | 0.00 |
| ATOM | 3815 | 2HD1 | ILE | A | 275 | 19.796 | 33.315 | 8.605  | 1.00 | 0.00 |
| ATOM | 3816 | 3HD1 | ILE | A | 275 | 18.218 | 32.494 | 8.582  | 1.00 | 0.00 |
| ATOM | 3817 | N    | PHE | A | 276 | 16.872 | 35.107 | 13.807 | 1.00 | 0.00 |
| ATOM | 3818 | CA   | PHE | A | 276 | 16.840 | 34.798 | 15.233 | 1.00 | 0.00 |
| ATOM | 3819 | C    | PHE | A | 276 | 16.389 | 33.360 | 15.410 | 1.00 | 0.00 |
| ATOM | 3820 | O    | PHE | A | 276 | 15.495 | 32.888 | 14.708 | 1.00 | 0.00 |
| ATOM | 3821 | CB   | PHE | A | 276 | 15.910 | 35.751 | 15.986 | 1.00 | 0.00 |
| ATOM | 3822 | CG   | PHE | A | 276 | 16.400 | 37.171 | 16.025 | 1.00 | 0.00 |
| ATOM | 3823 | CD1  | PHE | A | 276 | 15.960 | 38.097 | 15.091 | 1.00 | 0.00 |
| ATOM | 3824 | CD2  | PHE | A | 276 | 17.302 | 37.583 | 16.995 | 1.00 | 0.00 |
| ATOM | 3825 | CE1  | PHE | A | 276 | 16.411 | 39.404 | 15.126 | 1.00 | 0.00 |
| ATOM | 3826 | CE2  | PHE | A | 276 | 17.753 | 38.888 | 17.033 | 1.00 | 0.00 |
| ATOM | 3827 | CZ   | PHE | A | 276 | 17.306 | 39.799 | 16.097 | 1.00 | 0.00 |
| ATOM | 3828 | H    | PHE | A | 276 | 16.010 | 35.339 | 13.334 | 1.00 | 0.00 |
| ATOM | 3829 | HA   | PHE | A | 276 | 17.841 | 34.894 | 15.655 | 1.00 | 0.00 |
| ATOM | 3830 | 1HB  | PHE | A | 276 | 14.930 | 35.773 | 15.512 | 1.00 | 0.00 |
| ATOM | 3831 | 2HB  | PHE | A | 276 | 15.804 | 35.430 | 17.022 | 1.00 | 0.00 |
| ATOM | 3832 | HD1  | PHE | A | 276 | 15.251 | 37.785 | 14.325 | 1.00 | 0.00 |
| ATOM | 3833 | HD2  | PHE | A | 276 | 17.655 | 36.862 | 17.734 | 1.00 | 0.00 |
| ATOM | 3834 | HE1  | PHE | A | 276 | 16.057 | 40.121 | 14.386 | 1.00 | 0.00 |
| ATOM | 3835 | HE2  | PHE | A | 276 | 18.461 | 39.199 | 17.800 | 1.00 | 0.00 |
| ATOM | 3836 | HZ   | PHE | A | 276 | 17.662 | 40.828 | 16.124 | 1.00 | 0.00 |
| ATOM | 3837 | N    | PHE | A | 277 | 17.027 | 32.671 | 16.345 | 1.00 | 0.00 |
| ATOM | 3838 | CA   | PHE | A | 277 | 16.685 | 31.293 | 16.675 | 1.00 | 0.00 |
| ATOM | 3839 | C    | PHE | A | 277 | 16.296 | 31.357 | 18.143 | 1.00 | 0.00 |

PEDF\_P1\_final\_docking\_model.txt

|      |      |      |     |   |     |        |        |        |      |      |
|------|------|------|-----|---|-----|--------|--------|--------|------|------|
| ATOM | 3840 | O    | PHE | A | 277 | 17.141 | 31.476 | 19.017 | 1.00 | 0.00 |
| ATOM | 3841 | CB   | PHE | A | 277 | 17.846 | 30.326 | 16.433 | 1.00 | 0.00 |
| ATOM | 3842 | CG   | PHE | A | 277 | 18.282 | 30.250 | 14.998 | 1.00 | 0.00 |
| ATOM | 3843 | CD1  | PHE | A | 277 | 19.273 | 31.089 | 14.513 | 1.00 | 0.00 |
| ATOM | 3844 | CD2  | PHE | A | 277 | 17.701 | 29.339 | 14.129 | 1.00 | 0.00 |
| ATOM | 3845 | CE1  | PHE | A | 277 | 19.675 | 31.020 | 13.193 | 1.00 | 0.00 |
| ATOM | 3846 | CE2  | PHE | A | 277 | 18.101 | 29.266 | 12.809 | 1.00 | 0.00 |
| ATOM | 3847 | CZ   | PHE | A | 277 | 19.089 | 30.108 | 12.340 | 1.00 | 0.00 |
| ATOM | 3848 | H    | PHE | A | 277 | 17.779 | 33.125 | 16.845 | 1.00 | 0.00 |
| ATOM | 3849 | HA   | PHE | A | 277 | 15.848 | 30.962 | 16.059 | 1.00 | 0.00 |
| ATOM | 3850 | 1HB  | PHE | A | 277 | 18.718 | 30.636 | 17.008 | 1.00 | 0.00 |
| ATOM | 3851 | 2HB  | PHE | A | 277 | 17.559 | 29.317 | 16.726 | 1.00 | 0.00 |
| ATOM | 3852 | HD1  | PHE | A | 277 | 19.738 | 31.810 | 15.188 | 1.00 | 0.00 |
| ATOM | 3853 | HD2  | PHE | A | 277 | 16.919 | 28.674 | 14.499 | 1.00 | 0.00 |
| ATOM | 3854 | HE1  | PHE | A | 277 | 20.455 | 31.686 | 12.825 | 1.00 | 0.00 |
| ATOM | 3855 | HE2  | PHE | A | 277 | 17.636 | 28.545 | 12.136 | 1.00 | 0.00 |
| ATOM | 3856 | HZ   | PHE | A | 277 | 19.404 | 30.053 | 11.299 | 1.00 | 0.00 |
| ATOM | 3857 | N    | LEU | A | 278 | 15.000 | 31.303 | 18.397 | 1.00 | 0.00 |
| ATOM | 3858 | CA   | LEU | A | 278 | 14.467 | 31.397 | 19.748 | 1.00 | 0.00 |
| ATOM | 3859 | C    | LEU | A | 278 | 13.938 | 30.061 | 20.288 | 1.00 | 0.00 |
| ATOM | 3860 | O    | LEU | A | 278 | 12.891 | 29.577 | 19.854 | 1.00 | 0.00 |
| ATOM | 3861 | CB   | LEU | A | 278 | 13.357 | 32.455 | 19.784 | 1.00 | 0.00 |
| ATOM | 3862 | CG   | LEU | A | 278 | 12.680 | 32.644 | 21.148 | 1.00 | 0.00 |
| ATOM | 3863 | CD1  | LEU | A | 278 | 13.695 | 33.133 | 22.172 | 1.00 | 0.00 |
| ATOM | 3864 | CD2  | LEU | A | 278 | 11.532 | 33.633 | 21.012 | 1.00 | 0.00 |
| ATOM | 3865 | H    | LEU | A | 278 | 14.361 | 31.193 | 17.623 | 1.00 | 0.00 |
| ATOM | 3866 | HA   | LEU | A | 278 | 15.262 | 31.684 | 20.435 | 1.00 | 0.00 |
| ATOM | 3867 | 1HB  | LEU | A | 278 | 13.945 | 33.337 | 19.533 | 1.00 | 0.00 |
| ATOM | 3868 | 2HB  | LEU | A | 278 | 12.610 | 32.284 | 19.009 | 1.00 | 0.00 |
| ATOM | 3869 | HG   | LEU | A | 278 | 12.258 | 31.681 | 21.436 | 1.00 | 0.00 |
| ATOM | 3870 | 1HD1 | LEU | A | 278 | 13.206 | 33.264 | 23.137 | 1.00 | 0.00 |
| ATOM | 3871 | 2HD1 | LEU | A | 278 | 14.496 | 32.399 | 22.269 | 1.00 | 0.00 |
| ATOM | 3872 | 3HD1 | LEU | A | 278 | 14.113 | 34.085 | 21.845 | 1.00 | 0.00 |
| ATOM | 3873 | 1HD2 | LEU | A | 278 | 11.051 | 33.766 | 21.982 | 1.00 | 0.00 |
| ATOM | 3874 | 2HD2 | LEU | A | 278 | 11.916 | 34.592 | 20.663 | 1.00 | 0.00 |
| ATOM | 3875 | 3HD2 | LEU | A | 278 | 10.804 | 33.251 | 20.297 | 1.00 | 0.00 |
| ATOM | 3876 | N    | PRO | A | 279 | 14.651 | 29.449 | 21.249 | 1.00 | 0.00 |
| ATOM | 3877 | CA   | PRO | A | 279 | 14.156 | 28.173 | 21.774 | 1.00 | 0.00 |
| ATOM | 3878 | C    | PRO | A | 279 | 12.790 | 28.310 | 22.465 | 1.00 | 0.00 |
| ATOM | 3879 | O    | PRO | A | 279 | 12.411 | 29.398 | 22.896 | 1.00 | 0.00 |
| ATOM | 3880 | CB   | PRO | A | 279 | 15.274 | 27.776 | 22.742 | 1.00 | 0.00 |
| ATOM | 3881 | CG   | PRO | A | 279 | 15.885 | 29.104 | 23.191 | 1.00 | 0.00 |
| ATOM | 3882 | CD   | PRO | A | 279 | 15.856 | 29.927 | 21.910 | 1.00 | 0.00 |
| ATOM | 3883 | HA   | PRO | A | 279 | 13.983 | 27.427 | 20.985 | 1.00 | 0.00 |
| ATOM | 3884 | 1HB  | PRO | A | 279 | 14.882 | 27.209 | 23.600 | 1.00 | 0.00 |
| ATOM | 3885 | 2HB  | PRO | A | 279 | 16.025 | 27.140 | 22.251 | 1.00 | 0.00 |
| ATOM | 3886 | 1HG  | PRO | A | 279 | 15.295 | 29.560 | 23.999 | 1.00 | 0.00 |
| ATOM | 3887 | 2HG  | PRO | A | 279 | 16.905 | 28.962 | 23.578 | 1.00 | 0.00 |
| ATOM | 3888 | 1HD  | PRO | A | 279 | 15.802 | 31.007 | 22.111 | 1.00 | 0.00 |
| ATOM | 3889 | 2HD  | PRO | A | 279 | 16.748 | 29.760 | 21.288 | 1.00 | 0.00 |
| ATOM | 3890 | N    | LEU | A | 280 | 12.052 | 27.206 | 22.551 | 1.00 | 0.00 |
| ATOM | 3891 | CA   | LEU | A | 280 | 10.728 | 27.199 | 23.178 | 1.00 | 0.00 |
| ATOM | 3892 | C    | LEU | A | 280 | 10.779 | 27.416 | 24.694 | 1.00 | 0.00 |
| ATOM | 3893 | O    | LEU | A | 280 | 10.150 | 28.339 | 25.224 | 1.00 | 0.00 |
| ATOM | 3894 | CB   | LEU | A | 280 | 10.016 | 25.877 | 22.863 | 1.00 | 0.00 |
| ATOM | 3895 | CG   | LEU | A | 280 | 9.588  | 25.698 | 21.401 | 1.00 | 0.00 |
| ATOM | 3896 | CD1  | LEU | A | 280 | 9.051  | 24.291 | 21.183 | 1.00 | 0.00 |
| ATOM | 3897 | CD2  | LEU | A | 280 | 8.536  | 26.739 | 21.048 | 1.00 | 0.00 |
| ATOM | 3898 | H    | LEU | A | 280 | 12.421 | 26.346 | 22.170 | 1.00 | 0.00 |
| ATOM | 3899 | HA   | LEU | A | 280 | 10.136 | 28.027 | 22.789 | 1.00 | 0.00 |
| ATOM | 3900 | 1HB  | LEU | A | 280 | 10.818 | 25.182 | 23.106 | 1.00 | 0.00 |
| ATOM | 3901 | 2HB  | LEU | A | 280 | 9.171  | 25.705 | 23.530 | 1.00 | 0.00 |
| ATOM | 3902 | HG   | LEU | A | 280 | 10.465 | 25.888 | 20.782 | 1.00 | 0.00 |

PEDF\_P1\_final\_docking\_model.txt

|      |      |      |     |   |     |        |        |        |      |      |
|------|------|------|-----|---|-----|--------|--------|--------|------|------|
| ATOM | 3903 | 1HD1 | LEU | A | 280 | 8.750  | 24.173 | 20.142 | 1.00 | 0.00 |
| ATOM | 3904 | 2HD1 | LEU | A | 280 | 9.828  | 23.564 | 21.420 | 1.00 | 0.00 |
| ATOM | 3905 | 3HD1 | LEU | A | 280 | 8.190  | 24.126 | 21.830 | 1.00 | 0.00 |
| ATOM | 3906 | 1HD2 | LEU | A | 280 | 8.233  | 26.611 | 20.008 | 1.00 | 0.00 |
| ATOM | 3907 | 2HD2 | LEU | A | 280 | 7.668  | 26.614 | 21.696 | 1.00 | 0.00 |
| ATOM | 3908 | 3HD2 | LEU | A | 280 | 8.950  | 27.737 | 21.184 | 1.00 | 0.00 |
| ATOM | 3909 | N    | LYS | A | 281 | 11.530 | 26.567 | 25.391 | 1.00 | 0.00 |
| ATOM | 3910 | CA   | LYS | A | 281 | 11.660 | 26.674 | 26.845 | 1.00 | 0.00 |
| ATOM | 3911 | C    | LYS | A | 281 | 12.884 | 27.523 | 27.187 | 1.00 | 0.00 |
| ATOM | 3912 | O    | LYS | A | 281 | 13.854 | 27.544 | 26.425 | 1.00 | 0.00 |
| ATOM | 3913 | CB   | LYS | A | 281 | 11.770 | 25.291 | 27.489 | 1.00 | 0.00 |
| ATOM | 3914 | CG   | LYS | A | 281 | 10.518 | 24.434 | 27.355 | 1.00 | 0.00 |
| ATOM | 3915 | CD   | LYS | A | 281 | 10.723 | 23.057 | 27.969 | 1.00 | 0.00 |
| ATOM | 3916 | CE   | LYS | A | 281 | 9.462  | 22.211 | 27.867 | 1.00 | 0.00 |
| ATOM | 3917 | NZ   | LYS | A | 281 | 9.642  | 20.867 | 28.478 | 1.00 | 0.00 |
| ATOM | 3918 | H    | LYS | A | 281 | 12.023 | 25.831 | 24.906 | 1.00 | 0.00 |
| ATOM | 3919 | HA   | LYS | A | 281 | 10.784 | 27.176 | 27.258 | 1.00 | 0.00 |
| ATOM | 3920 | 1HB  | LYS | A | 281 | 12.610 | 24.783 | 27.013 | 1.00 | 0.00 |
| ATOM | 3921 | 2HB  | LYS | A | 281 | 11.992 | 25.446 | 28.545 | 1.00 | 0.00 |
| ATOM | 3922 | 1HG  | LYS | A | 281 | 9.696  | 24.940 | 27.863 | 1.00 | 0.00 |
| ATOM | 3923 | 2HG  | LYS | A | 281 | 10.282 | 24.329 | 26.297 | 1.00 | 0.00 |
| ATOM | 3924 | 1HD  | LYS | A | 281 | 11.538 | 22.559 | 27.442 | 1.00 | 0.00 |
| ATOM | 3925 | 2HD  | LYS | A | 281 | 10.992 | 23.180 | 29.018 | 1.00 | 0.00 |
| ATOM | 3926 | 1HE  | LYS | A | 281 | 8.656  | 22.737 | 28.378 | 1.00 | 0.00 |
| ATOM | 3927 | 2HE  | LYS | A | 281 | 9.210  | 22.100 | 26.812 | 1.00 | 0.00 |
| ATOM | 3928 | 1HZ  | LYS | A | 281 | 8.785  | 20.339 | 28.389 | 1.00 | 0.00 |
| ATOM | 3929 | 2HZ  | LYS | A | 281 | 10.389 | 20.378 | 28.004 | 1.00 | 0.00 |
| ATOM | 3930 | 3HZ  | LYS | A | 281 | 9.874  | 20.970 | 29.456 | 1.00 | 0.00 |
| ATOM | 3931 | N    | VAL | A | 282 | 12.841 | 28.228 | 28.315 | 1.00 | 0.00 |
| ATOM | 3932 | CA   | VAL | A | 282 | 13.985 | 29.039 | 28.722 | 1.00 | 0.00 |
| ATOM | 3933 | C    | VAL | A | 282 | 15.132 | 28.087 | 29.043 | 1.00 | 0.00 |
| ATOM | 3934 | O    | VAL | A | 282 | 14.957 | 27.101 | 29.766 | 1.00 | 0.00 |
| ATOM | 3935 | CB   | VAL | A | 282 | 13.677 | 29.924 | 29.944 | 1.00 | 0.00 |
| ATOM | 3936 | CG1  | VAL | A | 282 | 14.932 | 30.651 | 30.405 | 1.00 | 0.00 |
| ATOM | 3937 | CG2  | VAL | A | 282 | 12.576 | 30.921 | 29.617 | 1.00 | 0.00 |
| ATOM | 3938 | H    | VAL | A | 282 | 12.018 | 28.209 | 28.900 | 1.00 | 0.00 |
| ATOM | 3939 | HA   | VAL | A | 282 | 14.320 | 29.687 | 27.911 | 1.00 | 0.00 |
| ATOM | 3940 | HB   | VAL | A | 282 | 13.304 | 29.295 | 30.752 | 1.00 | 0.00 |
| ATOM | 3941 | 1HG1 | VAL | A | 282 | 14.696 | 31.272 | 31.270 | 1.00 | 0.00 |
| ATOM | 3942 | 2HG1 | VAL | A | 282 | 15.694 | 29.923 | 30.679 | 1.00 | 0.00 |
| ATOM | 3943 | 3HG1 | VAL | A | 282 | 15.304 | 31.282 | 29.598 | 1.00 | 0.00 |
| ATOM | 3944 | 1HG2 | VAL | A | 282 | 12.370 | 31.537 | 30.491 | 1.00 | 0.00 |
| ATOM | 3945 | 2HG2 | VAL | A | 282 | 12.895 | 31.556 | 28.791 | 1.00 | 0.00 |
| ATOM | 3946 | 3HG2 | VAL | A | 282 | 11.671 | 30.383 | 29.332 | 1.00 | 0.00 |
| ATOM | 3947 | N    | THR | A | 283 | 16.302 | 28.384 | 28.492 | 1.00 | 0.00 |
| ATOM | 3948 | CA   | THR | A | 283 | 17.474 | 27.541 | 28.692 | 1.00 | 0.00 |
| ATOM | 3949 | C    | THR | A | 283 | 18.745 | 28.187 | 28.135 | 1.00 | 0.00 |
| ATOM | 3950 | O    | THR | A | 283 | 18.686 | 29.110 | 27.315 | 1.00 | 0.00 |
| ATOM | 3951 | CB   | THR | A | 283 | 17.285 | 26.160 | 28.037 | 1.00 | 0.00 |
| ATOM | 3952 | OG1  | THR | A | 283 | 18.398 | 25.317 | 28.363 | 1.00 | 0.00 |
| ATOM | 3953 | CG2  | THR | A | 283 | 17.183 | 26.296 | 26.526 | 1.00 | 0.00 |
| ATOM | 3954 | H    | THR | A | 283 | 16.384 | 29.213 | 27.921 | 1.00 | 0.00 |
| ATOM | 3955 | HA   | THR | A | 283 | 17.652 | 27.404 | 29.759 | 1.00 | 0.00 |
| ATOM | 3956 | HB   | THR | A | 283 | 16.372 | 25.707 | 28.423 | 1.00 | 0.00 |
| ATOM | 3957 | HG1  | THR | A | 283 | 18.278 | 24.457 | 27.954 | 1.00 | 0.00 |
| ATOM | 3958 | 1HG2 | THR | A | 283 | 17.049 | 25.310 | 26.081 | 1.00 | 0.00 |
| ATOM | 3959 | 2HG2 | THR | A | 283 | 16.330 | 26.927 | 26.274 | 1.00 | 0.00 |
| ATOM | 3960 | 3HG2 | THR | A | 283 | 18.095 | 26.748 | 26.139 | 1.00 | 0.00 |
| ATOM | 3961 | N    | GLN | A | 284 | 19.892 | 27.697 | 28.600 | 1.00 | 0.00 |
| ATOM | 3962 | CA   | GLN | A | 284 | 21.186 | 28.183 | 28.137 | 1.00 | 0.00 |
| ATOM | 3963 | C    | GLN | A | 284 | 21.764 | 27.103 | 27.232 | 1.00 | 0.00 |
| ATOM | 3964 | O    | GLN | A | 284 | 22.838 | 27.264 | 26.642 | 1.00 | 0.00 |
| ATOM | 3965 | CB   | GLN | A | 284 | 22.131 | 28.478 | 29.305 | 1.00 | 0.00 |

PEDF\_P1\_final\_docking\_model.txt

|      |      |      |     |   |     |        |        |        |      |      |
|------|------|------|-----|---|-----|--------|--------|--------|------|------|
| ATOM | 3966 | CG   | GLN | A | 284 | 21.660 | 29.594 | 30.221 | 1.00 | 0.00 |
| ATOM | 3967 | CD   | GLN | A | 284 | 22.621 | 29.848 | 31.366 | 1.00 | 0.00 |
| ATOM | 3968 | OE1  | GLN | A | 284 | 23.730 | 29.306 | 31.396 | 1.00 | 0.00 |
| ATOM | 3969 | NE2  | GLN | A | 284 | 22.200 | 30.671 | 32.320 | 1.00 | 0.00 |
| ATOM | 3970 | H    | GLN | A | 284 | 19.861 | 26.965 | 29.296 | 1.00 | 0.00 |
| ATOM | 3971 | HA   | GLN | A | 284 | 21.048 | 29.098 | 27.562 | 1.00 | 0.00 |
| ATOM | 3972 | 1HB  | GLN | A | 284 | 22.230 | 27.552 | 29.872 | 1.00 | 0.00 |
| ATOM | 3973 | 2HB  | GLN | A | 284 | 23.096 | 28.741 | 28.870 | 1.00 | 0.00 |
| ATOM | 3974 | 1HG  | GLN | A | 284 | 21.323 | 30.561 | 29.847 | 1.00 | 0.00 |
| ATOM | 3975 | 2HG  | GLN | A | 284 | 20.805 | 29.037 | 30.604 | 1.00 | 0.00 |
| ATOM | 3976 | 1HE2 | GLN | A | 284 | 22.791 | 30.876 | 33.101 | 1.00 | 0.00 |
| ATOM | 3977 | 2HE2 | GLN | A | 284 | 21.293 | 31.087 | 32.257 | 1.00 | 0.00 |
| ATOM | 3978 | N    | ASN | A | 285 | 21.032 | 25.995 | 27.145 | 1.00 | 0.00 |
| ATOM | 3979 | CA   | ASN | A | 285 | 21.407 | 24.864 | 26.307 | 1.00 | 0.00 |
| ATOM | 3980 | C    | ASN | A | 285 | 20.751 | 25.001 | 24.933 | 1.00 | 0.00 |
| ATOM | 3981 | O    | ASN | A | 285 | 19.562 | 24.725 | 24.757 | 1.00 | 0.00 |
| ATOM | 3982 | CB   | ASN | A | 285 | 21.037 | 23.540 | 26.949 | 1.00 | 0.00 |
| ATOM | 3983 | CG   | ASN | A | 285 | 21.502 | 22.339 | 26.172 | 1.00 | 0.00 |
| ATOM | 3984 | OD1  | ASN | A | 285 | 21.787 | 22.424 | 24.972 | 1.00 | 0.00 |
| ATOM | 3985 | ND2  | ASN | A | 285 | 21.501 | 21.207 | 26.829 | 1.00 | 0.00 |
| ATOM | 3986 | H    | ASN | A | 285 | 20.181 | 25.945 | 27.687 | 1.00 | 0.00 |
| ATOM | 3987 | HA   | ASN | A | 285 | 22.487 | 24.860 | 26.153 | 1.00 | 0.00 |
| ATOM | 3988 | 1HB  | ASN | A | 285 | 21.210 | 23.367 | 28.012 | 1.00 | 0.00 |
| ATOM | 3989 | 2HB  | ASN | A | 285 | 19.970 | 23.680 | 26.773 | 1.00 | 0.00 |
| ATOM | 3990 | 1HD2 | ASN | A | 285 | 21.799 | 20.367 | 26.375 | 1.00 | 0.00 |
| ATOM | 3991 | 2HD2 | ASN | A | 285 | 21.203 | 21.182 | 27.783 | 1.00 | 0.00 |
| ATOM | 3992 | N    | LEU | A | 286 | 21.550 | 25.432 | 23.965 | 1.00 | 0.00 |
| ATOM | 3993 | CA   | LEU | A | 286 | 21.084 | 25.651 | 22.603 | 1.00 | 0.00 |
| ATOM | 3994 | C    | LEU | A | 286 | 21.796 | 24.724 | 21.612 | 1.00 | 0.00 |
| ATOM | 3995 | O    | LEU | A | 286 | 21.752 | 24.939 | 20.400 | 1.00 | 0.00 |
| ATOM | 3996 | CB   | LEU | A | 286 | 21.290 | 27.119 | 22.208 | 1.00 | 0.00 |
| ATOM | 3997 | CG   | LEU | A | 286 | 20.644 | 28.145 | 23.148 | 1.00 | 0.00 |
| ATOM | 3998 | CD1  | LEU | A | 286 | 20.893 | 29.555 | 22.630 | 1.00 | 0.00 |
| ATOM | 3999 | CD2  | LEU | A | 286 | 19.153 | 27.865 | 23.258 | 1.00 | 0.00 |
| ATOM | 4000 | H    | LEU | A | 286 | 22.518 | 25.613 | 24.189 | 1.00 | 0.00 |
| ATOM | 4001 | HA   | LEU | A | 286 | 20.023 | 25.411 | 22.537 | 1.00 | 0.00 |
| ATOM | 4002 | 1HB  | LEU | A | 286 | 22.375 | 27.172 | 22.285 | 1.00 | 0.00 |
| ATOM | 4003 | 2HB  | LEU | A | 286 | 20.990 | 27.305 | 21.177 | 1.00 | 0.00 |
| ATOM | 4004 | HG   | LEU | A | 286 | 21.085 | 28.002 | 24.135 | 1.00 | 0.00 |
| ATOM | 4005 | 1HD1 | LEU | A | 286 | 20.430 | 30.277 | 23.304 | 1.00 | 0.00 |
| ATOM | 4006 | 2HD1 | LEU | A | 286 | 21.966 | 29.741 | 22.582 | 1.00 | 0.00 |
| ATOM | 4007 | 3HD1 | LEU | A | 286 | 20.460 | 29.659 | 21.636 | 1.00 | 0.00 |
| ATOM | 4008 | 1HD2 | LEU | A | 286 | 18.695 | 28.595 | 23.927 | 1.00 | 0.00 |
| ATOM | 4009 | 2HD2 | LEU | A | 286 | 18.695 | 27.939 | 22.272 | 1.00 | 0.00 |
| ATOM | 4010 | 3HD2 | LEU | A | 286 | 18.999 | 26.862 | 23.656 | 1.00 | 0.00 |
| ATOM | 4011 | N    | THR | A | 287 | 22.429 | 23.685 | 22.147 | 1.00 | 0.00 |
| ATOM | 4012 | CA   | THR | A | 287 | 23.187 | 22.711 | 21.367 | 1.00 | 0.00 |
| ATOM | 4013 | C    | THR | A | 287 | 22.565 | 22.159 | 20.083 | 1.00 | 0.00 |
| ATOM | 4014 | O    | THR | A | 287 | 23.139 | 22.320 | 19.005 | 1.00 | 0.00 |
| ATOM | 4015 | CB   | THR | A | 287 | 23.538 | 21.506 | 22.259 | 1.00 | 0.00 |
| ATOM | 4016 | OG1  | THR | A | 287 | 24.322 | 21.947 | 23.375 | 1.00 | 0.00 |
| ATOM | 4017 | CG2  | THR | A | 287 | 24.323 | 20.469 | 21.471 | 1.00 | 0.00 |
| ATOM | 4018 | H    | THR | A | 287 | 22.374 | 23.576 | 23.150 | 1.00 | 0.00 |
| ATOM | 4019 | HA   | THR | A | 287 | 24.101 | 23.171 | 20.991 | 1.00 | 0.00 |
| ATOM | 4020 | HB   | THR | A | 287 | 22.616 | 21.058 | 22.629 | 1.00 | 0.00 |
| ATOM | 4021 | HG1  | THR | A | 287 | 23.820 | 22.586 | 23.886 | 1.00 | 0.00 |
| ATOM | 4022 | 1HG2 | THR | A | 287 | 24.562 | 19.625 | 22.118 | 1.00 | 0.00 |
| ATOM | 4023 | 2HG2 | THR | A | 287 | 23.725 | 20.124 | 20.628 | 1.00 | 0.00 |
| ATOM | 4024 | 3HG2 | THR | A | 287 | 25.246 | 20.916 | 21.102 | 1.00 | 0.00 |
| ATOM | 4025 | N    | LEU | A | 288 | 21.421 | 21.487 | 20.189 | 1.00 | 0.00 |
| ATOM | 4026 | CA   | LEU | A | 288 | 20.771 | 20.925 | 19.004 | 1.00 | 0.00 |
| ATOM | 4027 | C    | LEU | A | 288 | 20.744 | 21.956 | 17.890 | 1.00 | 0.00 |
| ATOM | 4028 | O    | LEU | A | 288 | 20.998 | 21.626 | 16.728 | 1.00 | 0.00 |



PEDF\_P1\_final\_docking\_model.txt

|      |      |      |     |   |     |        |        |        |      |      |
|------|------|------|-----|---|-----|--------|--------|--------|------|------|
| ATOM | 4029 | CB   | LEU | A | 288 | 19.349 | 20.455 | 19.336 | 1.00 | 0.00 |
| ATOM | 4030 | CG   | LEU | A | 288 | 19.265 | 19.189 | 20.198 | 1.00 | 0.00 |
| ATOM | 4031 | CD1  | LEU | A | 288 | 17.818 | 18.918 | 20.588 | 1.00 | 0.00 |
| ATOM | 4032 | CD2  | LEU | A | 288 | 19.845 | 18.011 | 19.429 | 1.00 | 0.00 |
| ATOM | 4033 | H    | LEU | A | 288 | 20.990 | 21.359 | 21.094 | 1.00 | 0.00 |
| ATOM | 4034 | HA   | LEU | A | 288 | 21.345 | 20.072 | 18.643 | 1.00 | 0.00 |
| ATOM | 4035 | 1HB  | LEU | A | 288 | 19.006 | 21.318 | 19.905 | 1.00 | 0.00 |
| ATOM | 4036 | 2HB  | LEU | A | 288 | 18.740 | 20.346 | 18.439 | 1.00 | 0.00 |
| ATOM | 4037 | HG   | LEU | A | 288 | 19.888 | 19.353 | 21.077 | 1.00 | 0.00 |
| ATOM | 4038 | 1HD1 | LEU | A | 288 | 17.768 | 18.017 | 21.200 | 1.00 | 0.00 |
| ATOM | 4039 | 2HD1 | LEU | A | 288 | 17.430 | 19.764 | 21.156 | 1.00 | 0.00 |
| ATOM | 4040 | 3HD1 | LEU | A | 288 | 17.219 | 18.779 | 19.689 | 1.00 | 0.00 |
| ATOM | 4041 | 1HD2 | LEU | A | 288 | 19.785 | 17.112 | 20.043 | 1.00 | 0.00 |
| ATOM | 4042 | 2HD2 | LEU | A | 288 | 19.279 | 17.862 | 18.509 | 1.00 | 0.00 |
| ATOM | 4043 | 3HD2 | LEU | A | 288 | 20.888 | 18.214 | 19.185 | 1.00 | 0.00 |
| ATOM | 4044 | N    | ILE | A | 289 | 20.435 | 23.202 | 18.261 | 1.00 | 0.00 |
| ATOM | 4045 | CA   | ILE | A | 289 | 20.356 | 24.322 | 17.320 | 1.00 | 0.00 |
| ATOM | 4046 | C    | ILE | A | 289 | 21.714 | 24.685 | 16.718 | 1.00 | 0.00 |
| ATOM | 4047 | O    | ILE | A | 289 | 21.864 | 24.769 | 15.497 | 1.00 | 0.00 |
| ATOM | 4048 | CB   | ILE | A | 289 | 19.765 | 25.573 | 17.995 | 1.00 | 0.00 |
| ATOM | 4049 | CG1  | ILE | A | 289 | 18.296 | 25.341 | 18.357 | 1.00 | 0.00 |
| ATOM | 4050 | CG2  | ILE | A | 289 | 19.908 | 26.785 | 17.088 | 1.00 | 0.00 |
| ATOM | 4051 | CD1  | ILE | A | 289 | 17.714 | 26.405 | 19.259 | 1.00 | 0.00 |
| ATOM | 4052 | H    | ILE | A | 289 | 20.249 | 23.368 | 19.240 | 1.00 | 0.00 |
| ATOM | 4053 | HA   | ILE | A | 289 | 19.753 | 24.054 | 16.454 | 1.00 | 0.00 |
| ATOM | 4054 | HB   | ILE | A | 289 | 20.294 | 25.755 | 18.931 | 1.00 | 0.00 |
| ATOM | 4055 | 1HG1 | ILE | A | 289 | 17.734 | 25.308 | 17.424 | 1.00 | 0.00 |
| ATOM | 4056 | 2HG1 | ILE | A | 289 | 18.234 | 24.372 | 18.852 | 1.00 | 0.00 |
| ATOM | 4057 | 1HG2 | ILE | A | 289 | 19.485 | 27.660 | 17.580 | 1.00 | 0.00 |
| ATOM | 4058 | 2HG2 | ILE | A | 289 | 20.963 | 26.961 | 16.879 | 1.00 | 0.00 |
| ATOM | 4059 | 3HG2 | ILE | A | 289 | 19.379 | 26.604 | 16.152 | 1.00 | 0.00 |
| ATOM | 4060 | 1HD1 | ILE | A | 289 | 16.670 | 26.172 | 19.472 | 1.00 | 0.00 |
| ATOM | 4061 | 2HD1 | ILE | A | 289 | 18.275 | 26.439 | 20.193 | 1.00 | 0.00 |
| ATOM | 4062 | 3HD1 | ILE | A | 289 | 17.774 | 27.374 | 18.766 | 1.00 | 0.00 |
| ATOM | 4063 | N    | GLU | A | 290 | 22.697 | 24.905 | 17.583 | 1.00 | 0.00 |
| ATOM | 4064 | CA   | GLU | A | 290 | 24.038 | 25.243 | 17.141 | 1.00 | 0.00 |
| ATOM | 4065 | C    | GLU | A | 290 | 24.565 | 24.182 | 16.169 | 1.00 | 0.00 |
| ATOM | 4066 | O    | GLU | A | 290 | 25.170 | 24.503 | 15.138 | 1.00 | 0.00 |
| ATOM | 4067 | CB   | GLU | A | 290 | 24.977 | 25.385 | 18.341 | 1.00 | 0.00 |
| ATOM | 4068 | CG   | GLU | A | 290 | 24.624 | 26.525 | 19.285 | 1.00 | 0.00 |
| ATOM | 4069 | CD   | GLU | A | 290 | 25.525 | 26.538 | 20.488 | 1.00 | 0.00 |
| ATOM | 4070 | OE1  | GLU | A | 290 | 26.496 | 25.819 | 20.487 | 1.00 | 0.00 |
| ATOM | 4071 | OE2  | GLU | A | 290 | 25.308 | 27.347 | 21.359 | 1.00 | 0.00 |
| ATOM | 4072 | H    | GLU | A | 290 | 22.508 | 24.836 | 18.573 | 1.00 | 0.00 |
| ATOM | 4073 | HA   | GLU | A | 290 | 24.021 | 26.189 | 16.598 | 1.00 | 0.00 |
| ATOM | 4074 | 1HB  | GLU | A | 290 | 24.944 | 24.440 | 18.884 | 1.00 | 0.00 |
| ATOM | 4075 | 2HB  | GLU | A | 290 | 25.981 | 25.541 | 17.944 | 1.00 | 0.00 |
| ATOM | 4076 | 1HG  | GLU | A | 290 | 24.642 | 27.505 | 18.808 | 1.00 | 0.00 |
| ATOM | 4077 | 2HG  | GLU | A | 290 | 23.606 | 26.293 | 19.597 | 1.00 | 0.00 |
| ATOM | 4078 | N    | GLU | A | 291 | 24.321 | 22.919 | 16.508 | 1.00 | 0.00 |
| ATOM | 4079 | CA   | GLU | A | 291 | 24.759 | 21.788 | 15.697 | 1.00 | 0.00 |
| ATOM | 4080 | C    | GLU | A | 291 | 24.170 | 21.778 | 14.291 | 1.00 | 0.00 |
| ATOM | 4081 | O    | GLU | A | 291 | 24.661 | 21.073 | 13.413 | 1.00 | 0.00 |
| ATOM | 4082 | CB   | GLU | A | 291 | 24.410 | 20.477 | 16.405 | 1.00 | 0.00 |
| ATOM | 4083 | CG   | GLU | A | 291 | 25.173 | 20.240 | 17.701 | 1.00 | 0.00 |
| ATOM | 4084 | CD   | GLU | A | 291 | 26.656 | 20.185 | 17.459 | 1.00 | 0.00 |
| ATOM | 4085 | OE1  | GLU | A | 291 | 27.077 | 19.404 | 16.641 | 1.00 | 0.00 |
| ATOM | 4086 | OE2  | GLU | A | 291 | 27.358 | 21.001 | 18.010 | 1.00 | 0.00 |
| ATOM | 4087 | H    | GLU | A | 291 | 23.812 | 22.744 | 17.362 | 1.00 | 0.00 |
| ATOM | 4088 | HA   | GLU | A | 291 | 25.838 | 21.835 | 15.549 | 1.00 | 0.00 |
| ATOM | 4089 | 1HB  | GLU | A | 291 | 23.340 | 20.503 | 16.614 | 1.00 | 0.00 |
| ATOM | 4090 | 2HB  | GLU | A | 291 | 24.624 | 19.669 | 15.705 | 1.00 | 0.00 |
| ATOM | 4091 | 1HG  | GLU | A | 291 | 24.959 | 20.980 | 18.472 | 1.00 | 0.00 |

PEDF\_P1\_final\_docking\_model.txt

|      |      |      |     |   |     |        |        |        |      |      |
|------|------|------|-----|---|-----|--------|--------|--------|------|------|
| ATOM | 4092 | 2HG  | GLU | A | 291 | 24.822 | 19.263 | 18.030 | 1.00 | 0.00 |
| ATOM | 4093 | N    | SER | A | 292 | 23.123 | 22.567 | 14.077 | 1.00 | 0.00 |
| ATOM | 4094 | CA   | SER | A | 292 | 22.469 | 22.624 | 12.779 | 1.00 | 0.00 |
| ATOM | 4095 | C    | SER | A | 292 | 23.012 | 23.718 | 11.875 | 1.00 | 0.00 |
| ATOM | 4096 | O    | SER | A | 292 | 22.984 | 23.592 | 10.648 | 1.00 | 0.00 |
| ATOM | 4097 | CB   | SER | A | 292 | 20.977 | 22.811 | 12.973 | 1.00 | 0.00 |
| ATOM | 4098 | OG   | SER | A | 292 | 20.400 | 21.747 | 13.679 | 1.00 | 0.00 |
| ATOM | 4099 | H    | SER | A | 292 | 22.772 | 23.141 | 14.830 | 1.00 | 0.00 |
| ATOM | 4100 | HA   | SER | A | 292 | 22.506 | 21.680 | 12.233 | 1.00 | 0.00 |
| ATOM | 4101 | 1HB  | SER | A | 292 | 20.810 | 23.735 | 13.525 | 1.00 | 0.00 |
| ATOM | 4102 | 2HB  | SER | A | 292 | 20.504 | 22.884 | 11.994 | 1.00 | 0.00 |
| ATOM | 4103 | HG   | SER | A | 292 | 20.809 | 21.680 | 14.545 | 1.00 | 0.00 |
| ATOM | 4104 | N    | LEU | A | 293 | 23.504 | 24.791 | 12.485 | 1.00 | 0.00 |
| ATOM | 4105 | CA   | LEU | A | 293 | 24.016 | 25.928 | 11.734 | 1.00 | 0.00 |
| ATOM | 4106 | C    | LEU | A | 293 | 25.066 | 25.579 | 10.692 | 1.00 | 0.00 |
| ATOM | 4107 | O    | LEU | A | 293 | 26.195 | 25.216 | 11.024 | 1.00 | 0.00 |
| ATOM | 4108 | CB   | LEU | A | 293 | 24.540 | 26.989 | 12.702 | 1.00 | 0.00 |
| ATOM | 4109 | CG   | LEU | A | 293 | 23.482 | 27.464 | 13.702 | 1.00 | 0.00 |
| ATOM | 4110 | CD1  | LEU | A | 293 | 24.069 | 28.430 | 14.733 | 1.00 | 0.00 |
| ATOM | 4111 | CD2  | LEU | A | 293 | 22.254 | 28.049 | 13.003 | 1.00 | 0.00 |
| ATOM | 4112 | H    | LEU | A | 293 | 23.524 | 24.819 | 13.494 | 1.00 | 0.00 |
| ATOM | 4113 | HA   | LEU | A | 293 | 23.208 | 26.381 | 11.161 | 1.00 | 0.00 |
| ATOM | 4114 | 1HB  | LEU | A | 293 | 25.312 | 26.406 | 13.202 | 1.00 | 0.00 |
| ATOM | 4115 | 2HB  | LEU | A | 293 | 25.000 | 27.824 | 12.175 | 1.00 | 0.00 |
| ATOM | 4116 | HG   | LEU | A | 293 | 23.141 | 26.587 | 14.253 | 1.00 | 0.00 |
| ATOM | 4117 | 1HD1 | LEU | A | 293 | 23.287 | 28.744 | 15.425 | 1.00 | 0.00 |
| ATOM | 4118 | 2HD1 | LEU | A | 293 | 24.864 | 27.931 | 15.288 | 1.00 | 0.00 |
| ATOM | 4119 | 3HD1 | LEU | A | 293 | 24.474 | 29.303 | 14.223 | 1.00 | 0.00 |
| ATOM | 4120 | 1HD2 | LEU | A | 293 | 21.530 | 28.372 | 13.751 | 1.00 | 0.00 |
| ATOM | 4121 | 2HD2 | LEU | A | 293 | 22.553 | 28.902 | 12.394 | 1.00 | 0.00 |
| ATOM | 4122 | 3HD2 | LEU | A | 293 | 21.802 | 27.290 | 12.365 | 1.00 | 0.00 |
| ATOM | 4123 | N    | THR | A | 294 | 24.672 | 25.668 | 9.427  | 1.00 | 0.00 |
| ATOM | 4124 | CA   | THR | A | 294 | 25.581 | 25.443 | 8.316  | 1.00 | 0.00 |
| ATOM | 4125 | C    | THR | A | 294 | 25.053 | 26.374 | 7.247  | 1.00 | 0.00 |
| ATOM | 4126 | O    | THR | A | 294 | 23.972 | 26.941 | 7.404  | 1.00 | 0.00 |
| ATOM | 4127 | CB   | THR | A | 294 | 25.606 | 23.986 | 7.818  | 1.00 | 0.00 |
| ATOM | 4128 | OG1  | THR | A | 294 | 24.324 | 23.642 | 7.276  | 1.00 | 0.00 |
| ATOM | 4129 | CG2  | THR | A | 294 | 25.941 | 23.038 | 8.959  | 1.00 | 0.00 |
| ATOM | 4130 | H    | THR | A | 294 | 23.708 | 25.900 | 9.235  | 1.00 | 0.00 |
| ATOM | 4131 | HA   | THR | A | 294 | 26.597 | 25.705 | 8.612  | 1.00 | 0.00 |
| ATOM | 4132 | HB   | THR | A | 294 | 26.358 | 23.892 | 7.035  | 1.00 | 0.00 |
| ATOM | 4133 | HG1  | THR | A | 294 | 24.342 | 22.733 | 6.966  | 1.00 | 0.00 |
| ATOM | 4134 | 1HG2 | THR | A | 294 | 25.955 | 22.013 | 8.587  | 1.00 | 0.00 |
| ATOM | 4135 | 2HG2 | THR | A | 294 | 26.921 | 23.290 | 9.365  | 1.00 | 0.00 |
| ATOM | 4136 | 3HG2 | THR | A | 294 | 25.189 | 23.131 | 9.741  | 1.00 | 0.00 |
| ATOM | 4137 | N    | SER | A | 295 | 25.809 | 26.543 | 6.170  | 1.00 | 0.00 |
| ATOM | 4138 | CA   | SER | A | 295 | 25.406 | 27.442 | 5.102  | 1.00 | 0.00 |
| ATOM | 4139 | C    | SER | A | 295 | 24.203 | 26.906 | 4.367  | 1.00 | 0.00 |
| ATOM | 4140 | O    | SER | A | 295 | 23.240 | 27.639 | 4.105  | 1.00 | 0.00 |
| ATOM | 4141 | CB   | SER | A | 295 | 26.555 | 27.663 | 4.138  | 1.00 | 0.00 |
| ATOM | 4142 | OG   | SER | A | 295 | 27.620 | 28.350 | 4.736  | 1.00 | 0.00 |
| ATOM | 4143 | H    | SER | A | 295 | 26.681 | 26.040 | 6.087  | 1.00 | 0.00 |
| ATOM | 4144 | HA   | SER | A | 295 | 25.213 | 28.460 | 5.443  | 1.00 | 0.00 |
| ATOM | 4145 | 1HB  | SER | A | 295 | 26.910 | 26.693 | 3.791  | 1.00 | 0.00 |
| ATOM | 4146 | 2HB  | SER | A | 295 | 26.193 | 28.241 | 3.289  | 1.00 | 0.00 |
| ATOM | 4147 | HG   | SER | A | 295 | 27.948 | 27.843 | 5.483  | 1.00 | 0.00 |
| ATOM | 4148 | N    | GLU | A | 296 | 24.252 | 25.617 | 4.047  | 1.00 | 0.00 |
| ATOM | 4149 | CA   | GLU | A | 296 | 23.159 | 24.993 | 3.322  | 1.00 | 0.00 |
| ATOM | 4150 | C    | GLU | A | 296 | 21.894 | 24.949 | 4.166  | 1.00 | 0.00 |
| ATOM | 4151 | O    | GLU | A | 296 | 20.798 | 25.207 | 3.670  | 1.00 | 0.00 |
| ATOM | 4152 | CB   | GLU | A | 296 | 23.548 | 23.580 | 2.881  | 1.00 | 0.00 |
| ATOM | 4153 | CG   | GLU | A | 296 | 24.599 | 23.532 | 1.781  | 1.00 | 0.00 |
| ATOM | 4154 | CD   | GLU | A | 296 | 25.021 | 22.119 | 1.490  | 1.00 | 0.00 |

PEDF\_P1\_final\_docking\_model.txt

|      |      |      |     |   |     |        |        |        |      |      |
|------|------|------|-----|---|-----|--------|--------|--------|------|------|
| ATOM | 4155 | OE1  | GLU | A | 296 | 24.564 | 21.231 | 2.168  | 1.00 | 0.00 |
| ATOM | 4156 | OE2  | GLU | A | 296 | 25.710 | 21.914 | 0.518  | 1.00 | 0.00 |
| ATOM | 4157 | H    | GLU | A | 296 | 25.053 | 25.059 | 4.306  | 1.00 | 0.00 |
| ATOM | 4158 | HA   | GLU | A | 296 | 22.919 | 25.582 | 2.436  | 1.00 | 0.00 |
| ATOM | 4159 | 1HB  | GLU | A | 296 | 23.923 | 23.063 | 3.764  | 1.00 | 0.00 |
| ATOM | 4160 | 2HB  | GLU | A | 296 | 22.637 | 23.092 | 2.533  | 1.00 | 0.00 |
| ATOM | 4161 | 1HG  | GLU | A | 296 | 24.282 | 24.014 | 0.856  | 1.00 | 0.00 |
| ATOM | 4162 | 2HG  | GLU | A | 296 | 25.439 | 24.081 | 2.205  | 1.00 | 0.00 |
| ATOM | 4163 | N    | PHE | A | 297 | 22.034 | 24.633 | 5.445  | 1.00 | 0.00 |
| ATOM | 4164 | CA   | PHE | A | 297 | 20.867 | 24.589 | 6.304  | 1.00 | 0.00 |
| ATOM | 4165 | C    | PHE | A | 297 | 20.202 | 25.955 | 6.330  | 1.00 | 0.00 |
| ATOM | 4166 | O    | PHE | A | 297 | 18.979 | 26.048 | 6.235  | 1.00 | 0.00 |
| ATOM | 4167 | CB   | PHE | A | 297 | 21.293 | 24.164 | 7.707  | 1.00 | 0.00 |
| ATOM | 4168 | CG   | PHE | A | 297 | 20.207 | 24.351 | 8.739  | 1.00 | 0.00 |
| ATOM | 4169 | CD1  | PHE | A | 297 | 20.333 | 25.357 | 9.691  | 1.00 | 0.00 |
| ATOM | 4170 | CD2  | PHE | A | 297 | 19.101 | 23.510 | 8.759  | 1.00 | 0.00 |
| ATOM | 4171 | CE1  | PHE | A | 297 | 19.369 | 25.506 | 10.680 | 1.00 | 0.00 |
| ATOM | 4172 | CE2  | PHE | A | 297 | 18.137 | 23.657 | 9.750  | 1.00 | 0.00 |
| ATOM | 4173 | CZ   | PHE | A | 297 | 18.278 | 24.646 | 10.718 | 1.00 | 0.00 |
| ATOM | 4174 | H    | PHE | A | 297 | 22.941 | 24.421 | 5.836  | 1.00 | 0.00 |
| ATOM | 4175 | HA   | PHE | A | 297 | 20.141 | 23.878 | 5.906  | 1.00 | 0.00 |
| ATOM | 4176 | 1HB  | PHE | A | 297 | 21.560 | 23.108 | 7.714  | 1.00 | 0.00 |
| ATOM | 4177 | 2HB  | PHE | A | 297 | 22.147 | 24.756 | 8.034  | 1.00 | 0.00 |
| ATOM | 4178 | HD1  | PHE | A | 297 | 21.194 | 26.024 | 9.650  | 1.00 | 0.00 |
| ATOM | 4179 | HD2  | PHE | A | 297 | 18.989 | 22.734 | 8.001  | 1.00 | 0.00 |
| ATOM | 4180 | HE1  | PHE | A | 297 | 19.470 | 26.296 | 11.423 | 1.00 | 0.00 |
| ATOM | 4181 | HE2  | PHE | A | 297 | 17.270 | 22.996 | 9.769  | 1.00 | 0.00 |
| ATOM | 4182 | HZ   | PHE | A | 297 | 17.533 | 24.744 | 11.506 | 1.00 | 0.00 |
| ATOM | 4183 | N    | ILE | A | 298 | 21.001 | 27.015 | 6.442  | 1.00 | 0.00 |
| ATOM | 4184 | CA   | ILE | A | 298 | 20.450 | 28.365 | 6.484  | 1.00 | 0.00 |
| ATOM | 4185 | C    | ILE | A | 298 | 19.729 | 28.750 | 5.185  | 1.00 | 0.00 |
| ATOM | 4186 | O    | ILE | A | 298 | 18.781 | 29.530 | 5.218  | 1.00 | 0.00 |
| ATOM | 4187 | CB   | ILE | A | 298 | 21.528 | 29.373 | 6.898  | 1.00 | 0.00 |
| ATOM | 4188 | CG1  | ILE | A | 298 | 21.962 | 29.087 | 8.336  | 1.00 | 0.00 |
| ATOM | 4189 | CG2  | ILE | A | 298 | 21.046 | 30.816 | 6.790  | 1.00 | 0.00 |
| ATOM | 4190 | CD1  | ILE | A | 298 | 20.808 | 29.240 | 9.326  | 1.00 | 0.00 |
| ATOM | 4191 | H    | ILE | A | 298 | 22.002 | 26.890 | 6.499  | 1.00 | 0.00 |
| ATOM | 4192 | HA   | ILE | A | 298 | 19.672 | 28.439 | 7.242  | 1.00 | 0.00 |
| ATOM | 4193 | HB   | ILE | A | 298 | 22.397 | 29.249 | 6.252  | 1.00 | 0.00 |
| ATOM | 4194 | 1HG1 | ILE | A | 298 | 22.350 | 28.069 | 8.361  | 1.00 | 0.00 |
| ATOM | 4195 | 2HG1 | ILE | A | 298 | 22.763 | 29.786 | 8.578  | 1.00 | 0.00 |
| ATOM | 4196 | 1HG2 | ILE | A | 298 | 21.846 | 31.491 | 7.095  | 1.00 | 0.00 |
| ATOM | 4197 | 2HG2 | ILE | A | 298 | 20.765 | 31.029 | 5.760  | 1.00 | 0.00 |
| ATOM | 4198 | 3HG2 | ILE | A | 298 | 20.182 | 30.961 | 7.439  | 1.00 | 0.00 |
| ATOM | 4199 | 1HD1 | ILE | A | 298 | 21.162 | 29.028 | 10.335 | 1.00 | 0.00 |
| ATOM | 4200 | 2HD1 | ILE | A | 298 | 20.424 | 30.260 | 9.284  | 1.00 | 0.00 |
| ATOM | 4201 | 3HD1 | ILE | A | 298 | 20.012 | 28.543 | 9.069  | 1.00 | 0.00 |
| ATOM | 4202 | N    | HIS | A | 299 | 20.167 | 28.208 | 4.049  | 1.00 | 0.00 |
| ATOM | 4203 | CA   | HIS | A | 299 | 19.528 | 28.509 | 2.759  | 1.00 | 0.00 |
| ATOM | 4204 | C    | HIS | A | 299 | 18.109 | 27.923 | 2.689  | 1.00 | 0.00 |
| ATOM | 4205 | O    | HIS | A | 299 | 17.211 | 28.525 | 2.096  | 1.00 | 0.00 |
| ATOM | 4206 | CB   | HIS | A | 299 | 20.373 | 27.973 | 1.599  | 1.00 | 0.00 |
| ATOM | 4207 | CG   | HIS | A | 299 | 19.694 | 28.063 | 0.268  | 1.00 | 0.00 |
| ATOM | 4208 | ND1  | HIS | A | 299 | 19.430 | 29.266 | -0.352 | 1.00 | 0.00 |
| ATOM | 4209 | CD2  | HIS | A | 299 | 19.224 | 27.101 | -0.560 | 1.00 | 0.00 |
| ATOM | 4210 | CE1  | HIS | A | 299 | 18.827 | 29.039 | -1.507 | 1.00 | 0.00 |
| ATOM | 4211 | NE2  | HIS | A | 299 | 18.690 | 27.734 | -1.656 | 1.00 | 0.00 |
| ATOM | 4212 | H    | HIS | A | 299 | 20.955 | 27.576 | 4.072  | 1.00 | 0.00 |
| ATOM | 4213 | HA   | HIS | A | 299 | 19.423 | 29.588 | 2.645  | 1.00 | 0.00 |
| ATOM | 4214 | 1HB  | HIS | A | 299 | 21.300 | 28.541 | 1.514  | 1.00 | 0.00 |
| ATOM | 4215 | 2HB  | HIS | A | 299 | 20.606 | 26.921 | 1.760  | 1.00 | 0.00 |
| ATOM | 4216 | HD1  | HIS | A | 299 | 19.718 | 30.170 | -0.036 | 1.00 | 0.00 |
| ATOM | 4217 | HD2  | HIS | A | 299 | 19.206 | 26.013 | -0.497 | 1.00 | 0.00 |

PEDF\_P1\_final\_docking\_model.txt

|      |      |      |     |   |     |        |        |        |      |      |
|------|------|------|-----|---|-----|--------|--------|--------|------|------|
| ATOM | 4218 | HE1  | HIS | A | 299 | 18.534 | 29.867 | -2.152 | 1.00 | 0.00 |
| ATOM | 4219 | N    | ASP | A | 300 | 17.901 | 26.757 | 3.295  | 1.00 | 0.00 |
| ATOM | 4220 | CA   | ASP | A | 300 | 16.584 | 26.135 | 3.287  | 1.00 | 0.00 |
| ATOM | 4221 | C    | ASP | A | 300 | 15.660 | 26.898 | 4.219  | 1.00 | 0.00 |
| ATOM | 4222 | O    | ASP | A | 300 | 14.524 | 27.210 | 3.873  | 1.00 | 0.00 |
| ATOM | 4223 | CB   | ASP | A | 300 | 16.667 | 24.664 | 3.702  | 1.00 | 0.00 |
| ATOM | 4224 | CG   | ASP | A | 300 | 17.293 | 23.750 | 2.656  | 1.00 | 0.00 |
| ATOM | 4225 | OD1  | ASP | A | 300 | 17.440 | 24.176 | 1.535  | 1.00 | 0.00 |
| ATOM | 4226 | OD2  | ASP | A | 300 | 17.761 | 22.698 | 3.020  | 1.00 | 0.00 |
| ATOM | 4227 | H    | ASP | A | 300 | 18.662 | 26.292 | 3.769  | 1.00 | 0.00 |
| ATOM | 4228 | HA   | ASP | A | 300 | 16.158 | 26.185 | 2.284  | 1.00 | 0.00 |
| ATOM | 4229 | 1HB  | ASP | A | 300 | 17.162 | 24.510 | 4.661  | 1.00 | 0.00 |
| ATOM | 4230 | 2HB  | ASP | A | 300 | 15.606 | 24.432 | 3.798  | 1.00 | 0.00 |
| ATOM | 4231 | N    | ILE | A | 301 | 16.153 | 27.201 | 5.411  | 1.00 | 0.00 |
| ATOM | 4232 | CA   | ILE | A | 301 | 15.363 | 27.944 | 6.374  | 1.00 | 0.00 |
| ATOM | 4233 | C    | ILE | A | 301 | 14.969 | 29.277 | 5.752  | 1.00 | 0.00 |
| ATOM | 4234 | O    | ILE | A | 301 | 13.851 | 29.740 | 5.934  | 1.00 | 0.00 |
| ATOM | 4235 | CB   | ILE | A | 301 | 16.188 | 28.159 | 7.644  | 1.00 | 0.00 |
| ATOM | 4236 | CG1  | ILE | A | 301 | 16.454 | 26.819 | 8.325  | 1.00 | 0.00 |
| ATOM | 4237 | CG2  | ILE | A | 301 | 15.535 | 29.161 | 8.594  | 1.00 | 0.00 |
| ATOM | 4238 | CD1  | ILE | A | 301 | 15.162 | 26.120 | 8.753  | 1.00 | 0.00 |
| ATOM | 4239 | H    | ILE | A | 301 | 17.089 | 26.915 | 5.659  | 1.00 | 0.00 |
| ATOM | 4240 | HA   | ILE | A | 301 | 14.433 | 27.421 | 6.593  | 1.00 | 0.00 |
| ATOM | 4241 | HB   | ILE | A | 301 | 17.174 | 28.533 | 7.368  | 1.00 | 0.00 |
| ATOM | 4242 | 1HG1 | ILE | A | 301 | 17.002 | 26.198 | 7.617  | 1.00 | 0.00 |
| ATOM | 4243 | 2HG1 | ILE | A | 301 | 17.081 | 27.017 | 9.195  | 1.00 | 0.00 |
| ATOM | 4244 | 1HG2 | ILE | A | 301 | 16.157 | 29.280 | 9.481  | 1.00 | 0.00 |
| ATOM | 4245 | 2HG2 | ILE | A | 301 | 15.430 | 30.122 | 8.093  | 1.00 | 0.00 |
| ATOM | 4246 | 3HG2 | ILE | A | 301 | 14.551 | 28.796 | 8.888  | 1.00 | 0.00 |
| ATOM | 4247 | 1HD1 | ILE | A | 301 | 15.403 | 25.171 | 9.233  | 1.00 | 0.00 |
| ATOM | 4248 | 2HD1 | ILE | A | 301 | 14.620 | 26.754 | 9.455  | 1.00 | 0.00 |
| ATOM | 4249 | 3HD1 | ILE | A | 301 | 14.541 | 25.935 | 7.878  | 1.00 | 0.00 |
| ATOM | 4250 | N    | ASP | A | 302 | 15.879 | 29.879 | 4.996  | 1.00 | 0.00 |
| ATOM | 4251 | CA   | ASP | A | 302 | 15.592 | 31.159 | 4.373  | 1.00 | 0.00 |
| ATOM | 4252 | C    | ASP | A | 302 | 14.391 | 31.056 | 3.440  | 1.00 | 0.00 |
| ATOM | 4253 | O    | ASP | A | 302 | 13.540 | 31.944 | 3.407  | 1.00 | 0.00 |
| ATOM | 4254 | CB   | ASP | A | 302 | 16.816 | 31.668 | 3.607  | 1.00 | 0.00 |
| ATOM | 4255 | CG   | ASP | A | 302 | 16.653 | 33.061 | 3.016  | 1.00 | 0.00 |
| ATOM | 4256 | OD1  | ASP | A | 302 | 16.467 | 33.987 | 3.770  | 1.00 | 0.00 |
| ATOM | 4257 | OD2  | ASP | A | 302 | 16.871 | 33.214 | 1.837  | 1.00 | 0.00 |
| ATOM | 4258 | H    | ASP | A | 302 | 16.782 | 29.451 | 4.847  | 1.00 | 0.00 |
| ATOM | 4259 | HA   | ASP | A | 302 | 15.330 | 31.891 | 5.137  | 1.00 | 0.00 |
| ATOM | 4260 | 1HB  | ASP | A | 302 | 17.739 | 31.624 | 4.185  | 1.00 | 0.00 |
| ATOM | 4261 | 2HB  | ASP | A | 302 | 16.855 | 30.934 | 2.801  | 1.00 | 0.00 |
| ATOM | 4262 | N    | ARG | A | 303 | 14.311 | 29.965 | 2.690  | 1.00 | 0.00 |
| ATOM | 4263 | CA   | ARG | A | 303 | 13.214 | 29.798 | 1.750  | 1.00 | 0.00 |
| ATOM | 4264 | C    | ARG | A | 303 | 11.938 | 29.206 | 2.324  | 1.00 | 0.00 |
| ATOM | 4265 | O    | ARG | A | 303 | 10.855 | 29.521 | 1.845  | 1.00 | 0.00 |
| ATOM | 4266 | CB   | ARG | A | 303 | 13.663 | 29.001 | 0.534  | 1.00 | 0.00 |
| ATOM | 4267 | CG   | ARG | A | 303 | 14.746 | 29.665 | -0.301 | 1.00 | 0.00 |
| ATOM | 4268 | CD   | ARG | A | 303 | 15.168 | 28.882 | -1.491 | 1.00 | 0.00 |
| ATOM | 4269 | NE   | ARG | A | 303 | 14.126 | 28.693 | -2.488 | 1.00 | 0.00 |
| ATOM | 4270 | CZ   | ARG | A | 303 | 14.236 | 27.894 | -3.567 | 1.00 | 0.00 |
| ATOM | 4271 | NH1  | ARG | A | 303 | 15.349 | 27.239 | -3.815 | 1.00 | 0.00 |
| ATOM | 4272 | NH2  | ARG | A | 303 | 13.202 | 27.804 | -4.385 | 1.00 | 0.00 |
| ATOM | 4273 | H    | ARG | A | 303 | 15.010 | 29.240 | 2.764  | 1.00 | 0.00 |
| ATOM | 4274 | HA   | ARG | A | 303 | 12.899 | 30.772 | 1.373  | 1.00 | 0.00 |
| ATOM | 4275 | 1HB  | ARG | A | 303 | 14.028 | 28.042 | 0.899  | 1.00 | 0.00 |
| ATOM | 4276 | 2HB  | ARG | A | 303 | 12.780 | 28.842 | -0.085 | 1.00 | 0.00 |
| ATOM | 4277 | 1HG  | ARG | A | 303 | 14.375 | 30.630 | -0.648 | 1.00 | 0.00 |
| ATOM | 4278 | 2HG  | ARG | A | 303 | 15.623 | 29.819 | 0.328  | 1.00 | 0.00 |
| ATOM | 4279 | 1HD  | ARG | A | 303 | 15.995 | 29.397 | -1.979 | 1.00 | 0.00 |
| ATOM | 4280 | 2HD  | ARG | A | 303 | 15.494 | 27.895 | -1.168 | 1.00 | 0.00 |

PEDF\_P1\_final\_docking\_model.txt

|      |      |      |     |   |     |        |        |        |      |      |
|------|------|------|-----|---|-----|--------|--------|--------|------|------|
| ATOM | 4281 | HE   | ARG | A | 303 | 13.201 | 29.100 | -2.539 | 1.00 | 0.00 |
| ATOM | 4282 | 1HH1 | ARG | A | 303 | 16.136 | 27.333 | -3.189 | 1.00 | 0.00 |
| ATOM | 4283 | 2HH1 | ARG | A | 303 | 15.411 | 26.646 | -4.629 | 1.00 | 0.00 |
| ATOM | 4284 | 1HH2 | ARG | A | 303 | 12.360 | 28.328 | -4.190 | 1.00 | 0.00 |
| ATOM | 4285 | 2HH2 | ARG | A | 303 | 13.258 | 27.213 | -5.202 | 1.00 | 0.00 |
| ATOM | 4286 | N    | GLU | A | 304 | 12.058 | 28.353 | 3.338  | 1.00 | 0.00 |
| ATOM | 4287 | CA   | GLU | A | 304 | 10.890 | 27.722 | 3.946  | 1.00 | 0.00 |
| ATOM | 4288 | C    | GLU | A | 304 | 10.100 | 28.706 | 4.839  | 1.00 | 0.00 |
| ATOM | 4289 | O    | GLU | A | 304 | 8.953  | 28.430 | 5.217  | 1.00 | 0.00 |
| ATOM | 4290 | CB   | GLU | A | 304 | 11.321 | 26.499 | 4.759  | 1.00 | 0.00 |
| ATOM | 4291 | CG   | GLU | A | 304 | 11.858 | 25.346 | 3.924  | 1.00 | 0.00 |
| ATOM | 4292 | CD   | GLU | A | 304 | 12.333 | 24.216 | 4.794  | 1.00 | 0.00 |
| ATOM | 4293 | OE1  | GLU | A | 304 | 12.258 | 24.343 | 5.993  | 1.00 | 0.00 |
| ATOM | 4294 | OE2  | GLU | A | 304 | 12.665 | 23.183 | 4.263  | 1.00 | 0.00 |
| ATOM | 4295 | H    | GLU | A | 304 | 12.977 | 28.136 | 3.697  | 1.00 | 0.00 |
| ATOM | 4296 | HA   | GLU | A | 304 | 10.196 | 27.402 | 3.168  | 1.00 | 0.00 |
| ATOM | 4297 | 1HB  | GLU | A | 304 | 12.092 | 26.834 | 5.453  | 1.00 | 0.00 |
| ATOM | 4298 | 2HB  | GLU | A | 304 | 10.447 | 26.165 | 5.320  | 1.00 | 0.00 |
| ATOM | 4299 | 1HG  | GLU | A | 304 | 11.141 | 24.966 | 3.197  | 1.00 | 0.00 |
| ATOM | 4300 | 2HG  | GLU | A | 304 | 12.708 | 25.783 | 3.401  | 1.00 | 0.00 |
| ATOM | 4301 | N    | LEU | A | 305 | 10.694 | 29.862 | 5.150  | 1.00 | 0.00 |
| ATOM | 4302 | CA   | LEU | A | 305 | 10.050 | 30.873 | 6.002  | 1.00 | 0.00 |
| ATOM | 4303 | C    | LEU | A | 305 | 8.843  | 31.549 | 5.352  | 1.00 | 0.00 |
| ATOM | 4304 | O    | LEU | A | 305 | 8.831  | 31.793 | 4.152  | 1.00 | 0.00 |
| ATOM | 4305 | CB   | LEU | A | 305 | 11.091 | 31.881 | 6.496  | 1.00 | 0.00 |
| ATOM | 4306 | CG   | LEU | A | 305 | 11.437 | 31.736 | 7.981  | 1.00 | 0.00 |
| ATOM | 4307 | CD1  | LEU | A | 305 | 11.663 | 30.284 | 8.405  | 1.00 | 0.00 |
| ATOM | 4308 | CD2  | LEU | A | 305 | 12.617 | 32.628 | 8.367  | 1.00 | 0.00 |
| ATOM | 4309 | H    | LEU | A | 305 | 11.618 | 30.043 | 4.784  | 1.00 | 0.00 |
| ATOM | 4310 | HA   | LEU | A | 305 | 9.655  | 30.397 | 6.899  | 1.00 | 0.00 |
| ATOM | 4311 | 1HB  | LEU | A | 305 | 11.935 | 31.582 | 5.876  | 1.00 | 0.00 |
| ATOM | 4312 | 2HB  | LEU | A | 305 | 10.807 | 32.905 | 6.255  | 1.00 | 0.00 |
| ATOM | 4313 | HG   | LEU | A | 305 | 10.575 | 32.084 | 8.550  | 1.00 | 0.00 |
| ATOM | 4314 | 1HD1 | LEU | A | 305 | 11.904 | 30.248 | 9.467  | 1.00 | 0.00 |
| ATOM | 4315 | 2HD1 | LEU | A | 305 | 10.758 | 29.706 | 8.220  | 1.00 | 0.00 |
| ATOM | 4316 | 3HD1 | LEU | A | 305 | 12.488 | 29.862 | 7.832  | 1.00 | 0.00 |
| ATOM | 4317 | 1HD2 | LEU | A | 305 | 12.836 | 32.502 | 9.428  | 1.00 | 0.00 |
| ATOM | 4318 | 2HD2 | LEU | A | 305 | 13.492 | 32.349 | 7.779  | 1.00 | 0.00 |
| ATOM | 4319 | 3HD2 | LEU | A | 305 | 12.365 | 33.670 | 8.171  | 1.00 | 0.00 |
| ATOM | 4320 | N    | LYS | A | 306 | 7.829  | 31.853 | 6.156  | 1.00 | 0.00 |
| ATOM | 4321 | CA   | LYS | A | 306 | 6.598  | 32.491 | 5.669  | 1.00 | 0.00 |
| ATOM | 4322 | C    | LYS | A | 306 | 6.400  | 33.878 | 6.292  | 1.00 | 0.00 |
| ATOM | 4323 | O    | LYS | A | 306 | 6.635  | 34.058 | 7.486  | 1.00 | 0.00 |
| ATOM | 4324 | CB   | LYS | A | 306 | 5.385  | 31.607 | 5.964  | 1.00 | 0.00 |
| ATOM | 4325 | CG   | LYS | A | 306 | 5.367  | 30.289 | 5.201  | 1.00 | 0.00 |
| ATOM | 4326 | CD   | LYS | A | 306 | 4.115  | 29.484 | 5.517  | 1.00 | 0.00 |
| ATOM | 4327 | CE   | LYS | A | 306 | 4.102  | 28.162 | 4.764  | 1.00 | 0.00 |
| ATOM | 4328 | NZ   | LYS | A | 306 | 2.885  | 27.361 | 5.067  | 1.00 | 0.00 |
| ATOM | 4329 | H    | LYS | A | 306 | 7.914  | 31.634 | 7.138  | 1.00 | 0.00 |
| ATOM | 4330 | HA   | LYS | A | 306 | 6.663  | 32.644 | 4.591  | 1.00 | 0.00 |
| ATOM | 4331 | 1HB  | LYS | A | 306 | 5.390  | 31.405 | 7.035  | 1.00 | 0.00 |
| ATOM | 4332 | 2HB  | LYS | A | 306 | 4.497  | 32.186 | 5.708  | 1.00 | 0.00 |
| ATOM | 4333 | 1HG  | LYS | A | 306 | 5.400  | 30.507 | 4.133  | 1.00 | 0.00 |
| ATOM | 4334 | 2HG  | LYS | A | 306 | 6.249  | 29.714 | 5.481  | 1.00 | 0.00 |
| ATOM | 4335 | 1HD  | LYS | A | 306 | 4.088  | 29.292 | 6.590  | 1.00 | 0.00 |
| ATOM | 4336 | 2HD  | LYS | A | 306 | 3.243  | 30.072 | 5.232  | 1.00 | 0.00 |
| ATOM | 4337 | 1HE  | LYS | A | 306 | 4.139  | 28.376 | 3.697  | 1.00 | 0.00 |
| ATOM | 4338 | 2HE  | LYS | A | 306 | 4.989  | 27.597 | 5.051  | 1.00 | 0.00 |
| ATOM | 4339 | 1HZ  | LYS | A | 306 | 2.915  | 26.494 | 4.549  | 1.00 | 0.00 |
| ATOM | 4340 | 2HZ  | LYS | A | 306 | 2.851  | 27.161 | 6.057  | 1.00 | 0.00 |
| ATOM | 4341 | 3HZ  | LYS | A | 306 | 2.063  | 27.884 | 4.801  | 1.00 | 0.00 |
| ATOM | 4342 | N    | THR | A | 307 | 5.967  | 34.856 | 5.494  | 1.00 | 0.00 |
| ATOM | 4343 | CA   | THR | A | 307 | 5.746  | 36.206 | 6.016  | 1.00 | 0.00 |

PEDF\_P1\_final\_docking\_model.txt

|      |      |      |     |   |     |        |        |        |      |      |
|------|------|------|-----|---|-----|--------|--------|--------|------|------|
| ATOM | 4344 | C    | THR | A | 307 | 4.493  | 36.213 | 6.868  | 1.00 | 0.00 |
| ATOM | 4345 | O    | THR | A | 307 | 3.435  | 35.753 | 6.445  | 1.00 | 0.00 |
| ATOM | 4346 | CB   | THR | A | 307 | 5.606  | 37.250 | 4.893  | 1.00 | 0.00 |
| ATOM | 4347 | OG1  | THR | A | 307 | 6.799  | 37.266 | 4.099  | 1.00 | 0.00 |
| ATOM | 4348 | CG2  | THR | A | 307 | 5.373  | 38.635 | 5.479  | 1.00 | 0.00 |
| ATOM | 4349 | H    | THR | A | 307 | 5.787  | 34.671 | 4.518  | 1.00 | 0.00 |
| ATOM | 4350 | HA   | THR | A | 307 | 6.583  | 36.497 | 6.652  | 1.00 | 0.00 |
| ATOM | 4351 | HB   | THR | A | 307 | 4.762  | 36.978 | 4.260  | 1.00 | 0.00 |
| ATOM | 4352 | HG1  | THR | A | 307 | 6.709  | 37.917 | 3.400  | 1.00 | 0.00 |
| ATOM | 4353 | 1HG2 | THR | A | 307 | 5.276  | 39.359 | 4.670  | 1.00 | 0.00 |
| ATOM | 4354 | 2HG2 | THR | A | 307 | 4.460  | 38.629 | 6.074  | 1.00 | 0.00 |
| ATOM | 4355 | 3HG2 | THR | A | 307 | 6.217  | 38.908 | 6.111  | 1.00 | 0.00 |
| ATOM | 4356 | N    | VAL | A | 308 | 4.623  | 36.744 | 8.073  | 1.00 | 0.00 |
| ATOM | 4357 | CA   | VAL | A | 308 | 3.511  | 36.821 | 8.995  | 1.00 | 0.00 |
| ATOM | 4358 | C    | VAL | A | 308 | 3.582  | 38.169 | 9.681  | 1.00 | 0.00 |
| ATOM | 4359 | O    | VAL | A | 308 | 4.506  | 38.940 | 9.446  | 1.00 | 0.00 |
| ATOM | 4360 | CB   | VAL | A | 308 | 3.513  | 35.682 | 10.037 | 1.00 | 0.00 |
| ATOM | 4361 | CG1  | VAL | A | 308 | 2.081  | 35.280 | 10.402 | 1.00 | 0.00 |
| ATOM | 4362 | CG2  | VAL | A | 308 | 4.295  | 34.443 | 9.605  | 1.00 | 0.00 |
| ATOM | 4363 | H    | VAL | A | 308 | 5.523  | 37.105 | 8.356  | 1.00 | 0.00 |
| ATOM | 4364 | HA   | VAL | A | 308 | 2.556  | 36.775 | 8.470  | 1.00 | 0.00 |
| ATOM | 4365 | HB   | VAL | A | 308 | 4.010  | 36.031 | 10.942 | 1.00 | 0.00 |
| ATOM | 4366 | 1HG1 | VAL | A | 308 | 2.105  | 34.476 | 11.138 | 1.00 | 0.00 |
| ATOM | 4367 | 2HG1 | VAL | A | 308 | 1.557  | 36.139 | 10.821 | 1.00 | 0.00 |
| ATOM | 4368 | 3HG1 | VAL | A | 308 | 1.560  | 34.937 | 9.508  | 1.00 | 0.00 |
| ATOM | 4369 | 1HG2 | VAL | A | 308 | 4.249  | 33.690 | 10.391 | 1.00 | 0.00 |
| ATOM | 4370 | 2HG2 | VAL | A | 308 | 3.860  | 34.040 | 8.690  | 1.00 | 0.00 |
| ATOM | 4371 | 3HG2 | VAL | A | 308 | 5.335  | 34.714 | 9.424  | 1.00 | 0.00 |
| ATOM | 4372 | N    | GLN | A | 309 | 2.589  | 38.463 | 10.510 | 1.00 | 0.00 |
| ATOM | 4373 | CA   | GLN | A | 309 | 2.568  | 39.709 | 11.262 | 1.00 | 0.00 |
| ATOM | 4374 | C    | GLN | A | 309 | 2.765  | 39.261 | 12.700 | 1.00 | 0.00 |
| ATOM | 4375 | O    | GLN | A | 309 | 2.205  | 38.245 | 13.115 | 1.00 | 0.00 |
| ATOM | 4376 | CB   | GLN | A | 309 | 1.257  | 40.481 | 11.087 | 1.00 | 0.00 |
| ATOM | 4377 | CG   | GLN | A | 309 | 0.997  | 40.952 | 9.666  | 1.00 | 0.00 |
| ATOM | 4378 | CD   | GLN | A | 309 | -0.335 | 41.662 | 9.527  | 1.00 | 0.00 |
| ATOM | 4379 | OE1  | GLN | A | 309 | -1.038 | 41.893 | 10.515 | 1.00 | 0.00 |
| ATOM | 4380 | NE2  | GLN | A | 309 | -0.693 | 42.011 | 8.296  | 1.00 | 0.00 |
| ATOM | 4381 | H    | GLN | A | 309 | 1.829  | 37.807 | 10.623 | 1.00 | 0.00 |
| ATOM | 4382 | HA   | GLN | A | 309 | 3.386  | 40.349 | 10.931 | 1.00 | 0.00 |
| ATOM | 4383 | 1HB  | GLN | A | 309 | 0.455  | 39.816 | 11.408 | 1.00 | 0.00 |
| ATOM | 4384 | 2HB  | GLN | A | 309 | 1.306  | 41.339 | 11.756 | 1.00 | 0.00 |
| ATOM | 4385 | 1HG  | GLN | A | 309 | 1.734  | 41.505 | 9.084  | 1.00 | 0.00 |
| ATOM | 4386 | 2HG  | GLN | A | 309 | 0.896  | 39.945 | 9.258  | 1.00 | 0.00 |
| ATOM | 4387 | 1HE2 | GLN | A | 309 | -1.563 | 42.482 | 8.142  | 1.00 | 0.00 |
| ATOM | 4388 | 2HE2 | GLN | A | 309 | -0.094 | 41.803 | 7.523  | 1.00 | 0.00 |
| ATOM | 4389 | N    | ALA | A | 310 | 3.552  | 39.994 | 13.473 | 1.00 | 0.00 |
| ATOM | 4390 | CA   | ALA | A | 310 | 3.780  | 39.552 | 14.835 | 1.00 | 0.00 |
| ATOM | 4391 | C    | ALA | A | 310 | 4.018  | 40.657 | 15.821 | 1.00 | 0.00 |
| ATOM | 4392 | O    | ALA | A | 310 | 4.255  | 41.805 | 15.456 | 1.00 | 0.00 |
| ATOM | 4393 | CB   | ALA | A | 310 | 5.021  | 38.661 | 14.889 | 1.00 | 0.00 |
| ATOM | 4394 | H    | ALA | A | 310 | 3.995  | 40.842 | 13.150 | 1.00 | 0.00 |
| ATOM | 4395 | HA   | ALA | A | 310 | 2.887  | 39.038 | 15.190 | 1.00 | 0.00 |
| ATOM | 4396 | 1HB  | ALA | A | 310 | 5.187  | 38.332 | 15.915 | 1.00 | 0.00 |
| ATOM | 4397 | 2HB  | ALA | A | 310 | 4.873  | 37.791 | 14.249 | 1.00 | 0.00 |
| ATOM | 4398 | 3HB  | ALA | A | 310 | 5.887  | 39.223 | 14.544 | 1.00 | 0.00 |
| ATOM | 4399 | N    | VAL | A | 311 | 3.925  | 40.289 | 17.089 | 1.00 | 0.00 |
| ATOM | 4400 | CA   | VAL | A | 311 | 4.170  | 41.213 | 18.176 | 1.00 | 0.00 |
| ATOM | 4401 | C    | VAL | A | 311 | 5.614  | 40.920 | 18.508 | 1.00 | 0.00 |
| ATOM | 4402 | O    | VAL | A | 311 | 5.935  | 39.881 | 19.075 | 1.00 | 0.00 |
| ATOM | 4403 | CB   | VAL | A | 311 | 3.257  | 41.004 | 19.399 | 1.00 | 0.00 |
| ATOM | 4404 | CG1  | VAL | A | 311 | 3.609  | 41.991 | 20.501 | 1.00 | 0.00 |
| ATOM | 4405 | CG2  | VAL | A | 311 | 1.795  | 41.148 | 19.003 | 1.00 | 0.00 |
| ATOM | 4406 | H    | VAL | A | 311 | 3.675  | 39.334 | 17.302 | 1.00 | 0.00 |

PEDF\_P1\_final\_docking\_model.txt

|      |      |      |     |   |     |        |        |        |      |      |
|------|------|------|-----|---|-----|--------|--------|--------|------|------|
| ATOM | 4407 | HA   | VAL | A | 311 | 4.044  | 42.247 | 17.853 | 1.00 | 0.00 |
| ATOM | 4408 | HB   | VAL | A | 311 | 3.386  | 39.986 | 19.767 | 1.00 | 0.00 |
| ATOM | 4409 | 1HG1 | VAL | A | 311 | 2.954  | 41.829 | 21.358 | 1.00 | 0.00 |
| ATOM | 4410 | 2HG1 | VAL | A | 311 | 4.645  | 41.844 | 20.805 | 1.00 | 0.00 |
| ATOM | 4411 | 3HG1 | VAL | A | 311 | 3.479  | 43.009 | 20.134 | 1.00 | 0.00 |
| ATOM | 4412 | 1HG2 | VAL | A | 311 | 1.164  | 40.997 | 19.879 | 1.00 | 0.00 |
| ATOM | 4413 | 2HG2 | VAL | A | 311 | 1.625  | 42.147 | 18.601 | 1.00 | 0.00 |
| ATOM | 4414 | 3HG2 | VAL | A | 311 | 1.548  | 40.405 | 18.246 | 1.00 | 0.00 |
| ATOM | 4415 | N    | LEU | A | 312 | 6.480  | 41.842 | 18.116 | 1.00 | 0.00 |
| ATOM | 4416 | CA   | LEU | A | 312 | 7.907  | 41.694 | 18.304 | 1.00 | 0.00 |
| ATOM | 4417 | C    | LEU | A | 312 | 8.535  | 42.610 | 19.353 | 1.00 | 0.00 |
| ATOM | 4418 | O    | LEU | A | 312 | 8.298  | 43.825 | 19.379 | 1.00 | 0.00 |
| ATOM | 4419 | CB   | LEU | A | 312 | 8.604  | 41.908 | 16.955 | 1.00 | 0.00 |
| ATOM | 4420 | CG   | LEU | A | 312 | 10.127 | 42.080 | 17.026 | 1.00 | 0.00 |
| ATOM | 4421 | CD1  | LEU | A | 312 | 10.789 | 40.744 | 17.331 | 1.00 | 0.00 |
| ATOM | 4422 | CD2  | LEU | A | 312 | 10.637 | 42.648 | 15.710 | 1.00 | 0.00 |
| ATOM | 4423 | H    | LEU | A | 312 | 6.126  | 42.677 | 17.670 | 1.00 | 0.00 |
| ATOM | 4424 | HA   | LEU | A | 312 | 8.124  | 40.693 | 18.675 | 1.00 | 0.00 |
| ATOM | 4425 | 1HB  | LEU | A | 312 | 8.357  | 40.962 | 16.476 | 1.00 | 0.00 |
| ATOM | 4426 | 2HB  | LEU | A | 312 | 8.155  | 42.727 | 16.393 | 1.00 | 0.00 |
| ATOM | 4427 | HG   | LEU | A | 312 | 10.333 | 42.812 | 17.808 | 1.00 | 0.00 |
| ATOM | 4428 | 1HD1 | LEU | A | 312 | 11.870 | 40.876 | 17.380 | 1.00 | 0.00 |
| ATOM | 4429 | 2HD1 | LEU | A | 312 | 10.427 | 40.367 | 18.288 | 1.00 | 0.00 |
| ATOM | 4430 | 3HD1 | LEU | A | 312 | 10.547 | 40.030 | 16.544 | 1.00 | 0.00 |
| ATOM | 4431 | 1HD2 | LEU | A | 312 | 11.719 | 42.770 | 15.763 | 1.00 | 0.00 |
| ATOM | 4432 | 2HD2 | LEU | A | 312 | 10.388 | 41.965 | 14.898 | 1.00 | 0.00 |
| ATOM | 4433 | 3HD2 | LEU | A | 312 | 10.171 | 43.616 | 15.526 | 1.00 | 0.00 |
| ATOM | 4434 | N    | THR | A | 313 | 9.336  | 42.004 | 20.222 | 1.00 | 0.00 |
| ATOM | 4435 | CA   | THR | A | 313 | 10.079 | 42.732 | 21.243 | 1.00 | 0.00 |
| ATOM | 4436 | C    | THR | A | 313 | 11.487 | 42.177 | 21.176 | 1.00 | 0.00 |
| ATOM | 4437 | O    | THR | A | 313 | 11.710 | 40.991 | 21.427 | 1.00 | 0.00 |
| ATOM | 4438 | CB   | THR | A | 313 | 9.498  | 42.561 | 22.659 | 1.00 | 0.00 |
| ATOM | 4439 | OG1  | THR | A | 313 | 9.418  | 41.166 | 22.980 | 1.00 | 0.00 |
| ATOM | 4440 | CG2  | THR | A | 313 | 8.110  | 43.177 | 22.744 | 1.00 | 0.00 |
| ATOM | 4441 | H    | THR | A | 313 | 9.429  | 41.000 | 20.168 | 1.00 | 0.00 |
| ATOM | 4442 | HA   | THR | A | 313 | 10.079 | 43.797 | 21.010 | 1.00 | 0.00 |
| ATOM | 4443 | HB   | THR | A | 313 | 10.157 | 43.052 | 23.374 | 1.00 | 0.00 |
| ATOM | 4444 | HG1  | THR | A | 313 | 8.636  | 40.788 | 22.569 | 1.00 | 0.00 |
| ATOM | 4445 | 1HG2 | THR | A | 313 | 7.716  | 43.047 | 23.752 | 1.00 | 0.00 |
| ATOM | 4446 | 2HG2 | THR | A | 313 | 8.170  | 44.240 | 22.512 | 1.00 | 0.00 |
| ATOM | 4447 | 3HG2 | THR | A | 313 | 7.450  | 42.686 | 22.030 | 1.00 | 0.00 |
| ATOM | 4448 | N    | VAL | A | 314 | 12.430 | 43.032 | 20.806 | 1.00 | 0.00 |
| ATOM | 4449 | CA   | VAL | A | 314 | 13.827 | 42.636 | 20.706 | 1.00 | 0.00 |
| ATOM | 4450 | C    | VAL | A | 314 | 14.677 | 43.605 | 21.535 | 1.00 | 0.00 |
| ATOM | 4451 | O    | VAL | A | 314 | 14.530 | 44.825 | 21.422 | 1.00 | 0.00 |
| ATOM | 4452 | CB   | VAL | A | 314 | 14.321 | 42.624 | 19.247 | 1.00 | 0.00 |
| ATOM | 4453 | CG1  | VAL | A | 314 | 13.985 | 43.939 | 18.560 | 1.00 | 0.00 |
| ATOM | 4454 | CG2  | VAL | A | 314 | 15.818 | 42.363 | 19.194 | 1.00 | 0.00 |
| ATOM | 4455 | H    | VAL | A | 314 | 12.172 | 43.984 | 20.588 | 1.00 | 0.00 |
| ATOM | 4456 | HA   | VAL | A | 314 | 13.990 | 41.645 | 21.132 | 1.00 | 0.00 |
| ATOM | 4457 | HB   | VAL | A | 314 | 13.838 | 41.803 | 18.717 | 1.00 | 0.00 |
| ATOM | 4458 | 1HG1 | VAL | A | 314 | 14.341 | 43.913 | 17.530 | 1.00 | 0.00 |
| ATOM | 4459 | 2HG1 | VAL | A | 314 | 12.906 | 44.088 | 18.567 | 1.00 | 0.00 |
| ATOM | 4460 | 3HG1 | VAL | A | 314 | 14.469 | 44.760 | 19.089 | 1.00 | 0.00 |
| ATOM | 4461 | 1HG2 | VAL | A | 314 | 16.150 | 42.357 | 18.156 | 1.00 | 0.00 |
| ATOM | 4462 | 2HG2 | VAL | A | 314 | 16.343 | 43.148 | 19.738 | 1.00 | 0.00 |
| ATOM | 4463 | 3HG2 | VAL | A | 314 | 16.037 | 41.397 | 19.649 | 1.00 | 0.00 |
| ATOM | 4464 | N    | PRO | A | 315 | 15.572 | 43.069 | 22.388 | 1.00 | 0.00 |
| ATOM | 4465 | CA   | PRO | A | 315 | 16.424 | 43.920 | 23.220 | 1.00 | 0.00 |
| ATOM | 4466 | C    | PRO | A | 315 | 17.380 | 44.808 | 22.426 | 1.00 | 0.00 |
| ATOM | 4467 | O    | PRO | A | 315 | 17.751 | 44.488 | 21.293 | 1.00 | 0.00 |
| ATOM | 4468 | CB   | PRO | A | 315 | 17.184 | 42.916 | 24.093 | 1.00 | 0.00 |
| ATOM | 4469 | CG   | PRO | A | 315 | 16.328 | 41.696 | 24.086 | 1.00 | 0.00 |

PEDF\_P1\_final\_docking\_model.txt

|      |      |      |     |   |     |        |        |        |      |      |
|------|------|------|-----|---|-----|--------|--------|--------|------|------|
| ATOM | 4470 | CD   | PRO | A | 315 | 15.711 | 41.648 | 22.714 | 1.00 | 0.00 |
| ATOM | 4471 | HA   | PRO | A | 315 | 15.849 | 44.642 | 23.819 | 1.00 | 0.00 |
| ATOM | 4472 | 1HB  | PRO | A | 315 | 18.184 | 42.704 | 23.686 | 1.00 | 0.00 |
| ATOM | 4473 | 2HB  | PRO | A | 315 | 17.326 | 43.297 | 25.115 | 1.00 | 0.00 |
| ATOM | 4474 | 1HG  | PRO | A | 315 | 16.923 | 40.792 | 24.284 | 1.00 | 0.00 |
| ATOM | 4475 | 2HG  | PRO | A | 315 | 15.554 | 41.749 | 24.866 | 1.00 | 0.00 |
| ATOM | 4476 | 1HD  | PRO | A | 315 | 16.349 | 41.120 | 21.989 | 1.00 | 0.00 |
| ATOM | 4477 | 2HD  | PRO | A | 315 | 14.736 | 41.140 | 22.714 | 1.00 | 0.00 |
| ATOM | 4478 | N    | LYS | A | 316 | 17.748 | 45.940 | 23.022 | 1.00 | 0.00 |
| ATOM | 4479 | CA   | LYS | A | 316 | 18.697 | 46.866 | 22.415 | 1.00 | 0.00 |
| ATOM | 4480 | C    | LYS | A | 316 | 20.032 | 46.163 | 22.611 | 1.00 | 0.00 |
| ATOM | 4481 | O    | LYS | A | 316 | 20.294 | 45.612 | 23.683 | 1.00 | 0.00 |
| ATOM | 4482 | CB   | LYS | A | 316 | 18.674 | 48.251 | 23.064 | 1.00 | 0.00 |
| ATOM | 4483 | CG   | LYS | A | 316 | 19.608 | 49.265 | 22.417 | 1.00 | 0.00 |
| ATOM | 4484 | CD   | LYS | A | 316 | 19.462 | 50.638 | 23.057 | 1.00 | 0.00 |
| ATOM | 4485 | CE   | LYS | A | 316 | 20.385 | 51.655 | 22.401 | 1.00 | 0.00 |
| ATOM | 4486 | NZ   | LYS | A | 316 | 20.242 | 53.007 | 23.006 | 1.00 | 0.00 |
| ATOM | 4487 | H    | LYS | A | 316 | 17.354 | 46.161 | 23.925 | 1.00 | 0.00 |
| ATOM | 4488 | HA   | LYS | A | 316 | 18.460 | 46.997 | 21.359 | 1.00 | 0.00 |
| ATOM | 4489 | 1HB  | LYS | A | 316 | 17.647 | 48.614 | 23.006 | 1.00 | 0.00 |
| ATOM | 4490 | 2HB  | LYS | A | 316 | 18.952 | 48.118 | 24.110 | 1.00 | 0.00 |
| ATOM | 4491 | 1HG  | LYS | A | 316 | 20.634 | 48.915 | 22.536 | 1.00 | 0.00 |
| ATOM | 4492 | 2HG  | LYS | A | 316 | 19.367 | 49.330 | 21.357 | 1.00 | 0.00 |
| ATOM | 4493 | 1HD  | LYS | A | 316 | 18.426 | 50.963 | 22.949 | 1.00 | 0.00 |
| ATOM | 4494 | 2HD  | LYS | A | 316 | 19.707 | 50.556 | 24.115 | 1.00 | 0.00 |
| ATOM | 4495 | 1HE  | LYS | A | 316 | 21.411 | 51.311 | 22.519 | 1.00 | 0.00 |
| ATOM | 4496 | 2HE  | LYS | A | 316 | 20.139 | 51.705 | 21.341 | 1.00 | 0.00 |
| ATOM | 4497 | 1HZ  | LYS | A | 316 | 20.869 | 53.650 | 22.544 | 1.00 | 0.00 |
| ATOM | 4498 | 2HZ  | LYS | A | 316 | 19.290 | 53.327 | 22.896 | 1.00 | 0.00 |
| ATOM | 4499 | 3HZ  | LYS | A | 316 | 20.470 | 52.961 | 23.989 | 1.00 | 0.00 |
| ATOM | 4500 | N    | LEU | A | 317 | 20.881 | 46.175 | 21.594 | 1.00 | 0.00 |
| ATOM | 4501 | CA   | LEU | A | 317 | 22.159 | 45.486 | 21.713 | 1.00 | 0.00 |
| ATOM | 4502 | C    | LEU | A | 317 | 23.379 | 46.305 | 21.294 | 1.00 | 0.00 |
| ATOM | 4503 | O    | LEU | A | 317 | 23.388 | 46.930 | 20.235 | 1.00 | 0.00 |
| ATOM | 4504 | CB   | LEU | A | 317 | 22.072 | 44.208 | 20.881 | 1.00 | 0.00 |
| ATOM | 4505 | CG   | LEU | A | 317 | 23.003 | 43.085 | 21.324 | 1.00 | 0.00 |
| ATOM | 4506 | CD1  | LEU | A | 317 | 22.613 | 42.553 | 22.705 | 1.00 | 0.00 |
| ATOM | 4507 | CD2  | LEU | A | 317 | 23.068 | 41.974 | 20.275 | 1.00 | 0.00 |
| ATOM | 4508 | H    | LEU | A | 317 | 20.659 | 46.655 | 20.733 | 1.00 | 0.00 |
| ATOM | 4509 | HA   | LEU | A | 317 | 22.349 | 45.247 | 22.759 | 1.00 | 0.00 |
| ATOM | 4510 | 1HB  | LEU | A | 317 | 21.037 | 43.937 | 21.081 | 1.00 | 0.00 |
| ATOM | 4511 | 2HB  | LEU | A | 317 | 22.196 | 44.410 | 19.817 | 1.00 | 0.00 |
| ATOM | 4512 | HG   | LEU | A | 317 | 24.005 | 43.508 | 21.405 | 1.00 | 0.00 |
| ATOM | 4513 | 1HD1 | LEU | A | 317 | 23.295 | 41.753 | 22.993 | 1.00 | 0.00 |
| ATOM | 4514 | 2HD1 | LEU | A | 317 | 22.672 | 43.360 | 23.436 | 1.00 | 0.00 |
| ATOM | 4515 | 3HD1 | LEU | A | 317 | 21.595 | 42.166 | 22.671 | 1.00 | 0.00 |
| ATOM | 4516 | 1HD2 | LEU | A | 317 | 23.741 | 41.188 | 20.620 | 1.00 | 0.00 |
| ATOM | 4517 | 2HD2 | LEU | A | 317 | 22.072 | 41.559 | 20.122 | 1.00 | 0.00 |
| ATOM | 4518 | 3HD2 | LEU | A | 317 | 23.439 | 42.382 | 19.335 | 1.00 | 0.00 |
| ATOM | 4519 | N    | LYS | A | 318 | 24.399 | 46.307 | 22.147 | 1.00 | 0.00 |
| ATOM | 4520 | CA   | LYS | A | 318 | 25.654 | 47.009 | 21.872 | 1.00 | 0.00 |
| ATOM | 4521 | C    | LYS | A | 318 | 26.721 | 46.141 | 22.515 | 1.00 | 0.00 |
| ATOM | 4522 | O    | LYS | A | 318 | 26.915 | 46.176 | 23.729 | 1.00 | 0.00 |
| ATOM | 4523 | CB   | LYS | A | 318 | 25.667 | 48.431 | 22.436 | 1.00 | 0.00 |
| ATOM | 4524 | CG   | LYS | A | 318 | 26.902 | 49.242 | 22.068 | 1.00 | 0.00 |
| ATOM | 4525 | CD   | LYS | A | 318 | 26.804 | 50.667 | 22.591 | 1.00 | 0.00 |
| ATOM | 4526 | CE   | LYS | A | 318 | 27.987 | 51.508 | 22.135 | 1.00 | 0.00 |
| ATOM | 4527 | NZ   | LYS | A | 318 | 27.859 | 52.927 | 22.564 | 1.00 | 0.00 |
| ATOM | 4528 | H    | LYS | A | 318 | 24.298 | 45.803 | 23.016 | 1.00 | 0.00 |
| ATOM | 4529 | HA   | LYS | A | 318 | 25.808 | 47.081 | 20.795 | 1.00 | 0.00 |
| ATOM | 4530 | 1HB  | LYS | A | 318 | 24.777 | 48.933 | 22.057 | 1.00 | 0.00 |
| ATOM | 4531 | 2HB  | LYS | A | 318 | 25.600 | 48.345 | 23.521 | 1.00 | 0.00 |
| ATOM | 4532 | 1HG  | LYS | A | 318 | 27.777 | 48.756 | 22.500 | 1.00 | 0.00 |



PEDF\_P1\_final\_docking\_model.txt

|      |      |      |     |   |     |        |        |        |      |      |
|------|------|------|-----|---|-----|--------|--------|--------|------|------|
| ATOM | 4533 | 2HG  | LYS | A | 318 | 26.995 | 49.259 | 20.983 | 1.00 | 0.00 |
| ATOM | 4534 | 1HD  | LYS | A | 318 | 25.878 | 51.110 | 22.221 | 1.00 | 0.00 |
| ATOM | 4535 | 2HD  | LYS | A | 318 | 26.780 | 50.637 | 23.681 | 1.00 | 0.00 |
| ATOM | 4536 | 1HE  | LYS | A | 318 | 28.894 | 51.081 | 22.560 | 1.00 | 0.00 |
| ATOM | 4537 | 2HE  | LYS | A | 318 | 28.039 | 51.462 | 21.048 | 1.00 | 0.00 |
| ATOM | 4538 | 1HZ  | LYS | A | 318 | 28.662 | 53.450 | 22.242 | 1.00 | 0.00 |
| ATOM | 4539 | 2HZ  | LYS | A | 318 | 27.018 | 53.325 | 22.170 | 1.00 | 0.00 |
| ATOM | 4540 | 3HZ  | LYS | A | 318 | 27.811 | 52.971 | 23.572 | 1.00 | 0.00 |
| ATOM | 4541 | N    | LEU | A | 319 | 27.401 | 45.348 | 21.692 | 1.00 | 0.00 |
| ATOM | 4542 | CA   | LEU | A | 319 | 28.411 | 44.429 | 22.191 | 1.00 | 0.00 |
| ATOM | 4543 | C    | LEU | A | 319 | 29.757 | 44.559 | 21.508 | 1.00 | 0.00 |
| ATOM | 4544 | O    | LEU | A | 319 | 29.871 | 45.082 | 20.398 | 1.00 | 0.00 |
| ATOM | 4545 | CB   | LEU | A | 319 | 28.021 | 42.966 | 21.983 | 1.00 | 0.00 |
| ATOM | 4546 | CG   | LEU | A | 319 | 26.636 | 42.513 | 22.425 | 1.00 | 0.00 |
| ATOM | 4547 | CD1  | LEU | A | 319 | 26.461 | 41.027 | 22.125 | 1.00 | 0.00 |
| ATOM | 4548 | CD2  | LEU | A | 319 | 26.343 | 42.816 | 23.890 | 1.00 | 0.00 |
| ATOM | 4549 | H    | LEU | A | 319 | 27.214 | 45.383 | 20.700 | 1.00 | 0.00 |
| ATOM | 4550 | HA   | LEU | A | 319 | 28.612 | 44.642 | 23.240 | 1.00 | 0.00 |
| ATOM | 4551 | 1HB  | LEU | A | 319 | 28.075 | 42.921 | 20.896 | 1.00 | 0.00 |
| ATOM | 4552 | 2HB  | LEU | A | 319 | 28.758 | 42.287 | 22.412 | 1.00 | 0.00 |
| ATOM | 4553 | HG   | LEU | A | 319 | 25.909 | 43.083 | 21.846 | 1.00 | 0.00 |
| ATOM | 4554 | 1HD1 | LEU | A | 319 | 25.469 | 40.706 | 22.442 | 1.00 | 0.00 |
| ATOM | 4555 | 2HD1 | LEU | A | 319 | 26.571 | 40.857 | 21.054 | 1.00 | 0.00 |
| ATOM | 4556 | 3HD1 | LEU | A | 319 | 27.216 | 40.456 | 22.664 | 1.00 | 0.00 |
| ATOM | 4557 | 1HD2 | LEU | A | 319 | 25.340 | 42.468 | 24.139 | 1.00 | 0.00 |
| ATOM | 4558 | 2HD2 | LEU | A | 319 | 27.072 | 42.306 | 24.520 | 1.00 | 0.00 |
| ATOM | 4559 | 3HD2 | LEU | A | 319 | 26.406 | 43.891 | 24.059 | 1.00 | 0.00 |
| ATOM | 4560 | N    | SER | A | 320 | 30.776 | 44.064 | 22.200 | 1.00 | 0.00 |
| ATOM | 4561 | CA   | SER | A | 320 | 32.140 | 44.075 | 21.704 | 1.00 | 0.00 |
| ATOM | 4562 | C    | SER | A | 320 | 32.837 | 42.820 | 22.222 | 1.00 | 0.00 |
| ATOM | 4563 | O    | SER | A | 320 | 32.386 | 42.185 | 23.183 | 1.00 | 0.00 |
| ATOM | 4564 | CB   | SER | A | 320 | 32.867 | 45.331 | 22.143 | 1.00 | 0.00 |
| ATOM | 4565 | OG   | SER | A | 320 | 33.038 | 45.381 | 23.533 | 1.00 | 0.00 |
| ATOM | 4566 | H    | SER | A | 320 | 30.586 | 43.665 | 23.108 | 1.00 | 0.00 |
| ATOM | 4567 | HA   | SER | A | 320 | 32.205 | 44.165 | 20.619 | 1.00 | 0.00 |
| ATOM | 4568 | 1HB  | SER | A | 320 | 33.845 | 45.353 | 21.665 | 1.00 | 0.00 |
| ATOM | 4569 | 2HB  | SER | A | 320 | 32.289 | 46.198 | 21.826 | 1.00 | 0.00 |
| ATOM | 4570 | HG   | SER | A | 320 | 33.500 | 46.189 | 23.769 | 1.00 | 0.00 |
| ATOM | 4571 | N    | TYR | A | 321 | 33.921 | 42.451 | 21.552 | 1.00 | 0.00 |
| ATOM | 4572 | CA   | TYR | A | 321 | 34.697 | 41.283 | 21.912 | 1.00 | 0.00 |
| ATOM | 4573 | C    | TYR | A | 321 | 36.099 | 41.506 | 21.415 | 1.00 | 0.00 |
| ATOM | 4574 | O    | TYR | A | 321 | 36.308 | 41.992 | 20.302 | 1.00 | 0.00 |
| ATOM | 4575 | CB   | TYR | A | 321 | 34.103 | 40.004 | 21.317 | 1.00 | 0.00 |
| ATOM | 4576 | CG   | TYR | A | 321 | 34.985 | 38.786 | 21.480 | 1.00 | 0.00 |
| ATOM | 4577 | CD1  | TYR | A | 321 | 35.059 | 38.118 | 22.694 | 1.00 | 0.00 |
| ATOM | 4578 | CD2  | TYR | A | 321 | 35.738 | 38.306 | 20.419 | 1.00 | 0.00 |
| ATOM | 4579 | CE1  | TYR | A | 321 | 35.863 | 37.004 | 22.848 | 1.00 | 0.00 |
| ATOM | 4580 | CE2  | TYR | A | 321 | 36.544 | 37.193 | 20.562 | 1.00 | 0.00 |
| ATOM | 4581 | CZ   | TYR | A | 321 | 36.604 | 36.545 | 21.779 | 1.00 | 0.00 |
| ATOM | 4582 | OH   | TYR | A | 321 | 37.405 | 35.436 | 21.926 | 1.00 | 0.00 |
| ATOM | 4583 | H    | TYR | A | 321 | 34.211 | 43.010 | 20.762 | 1.00 | 0.00 |
| ATOM | 4584 | HA   | TYR | A | 321 | 34.717 | 41.172 | 22.996 | 1.00 | 0.00 |
| ATOM | 4585 | 1HB  | TYR | A | 321 | 33.148 | 39.831 | 21.813 | 1.00 | 0.00 |
| ATOM | 4586 | 2HB  | TYR | A | 321 | 33.934 | 40.191 | 20.257 | 1.00 | 0.00 |
| ATOM | 4587 | HD1  | TYR | A | 321 | 34.471 | 38.486 | 23.534 | 1.00 | 0.00 |
| ATOM | 4588 | HD2  | TYR | A | 321 | 35.686 | 38.822 | 19.461 | 1.00 | 0.00 |
| ATOM | 4589 | HE1  | TYR | A | 321 | 35.912 | 36.490 | 23.808 | 1.00 | 0.00 |
| ATOM | 4590 | HE2  | TYR | A | 321 | 37.129 | 36.832 | 19.716 | 1.00 | 0.00 |
| ATOM | 4591 | HH   | TYR | A | 321 | 38.090 | 35.376 | 21.256 | 1.00 | 0.00 |
| ATOM | 4592 | N    | GLU | A | 322 | 37.057 | 41.140 | 22.253 | 1.00 | 0.00 |
| ATOM | 4593 | CA   | GLU | A | 322 | 38.459 | 41.284 | 21.930 | 1.00 | 0.00 |
| ATOM | 4594 | C    | GLU | A | 322 | 39.144 | 40.103 | 22.569 | 1.00 | 0.00 |
| ATOM | 4595 | O    | GLU | A | 322 | 39.312 | 40.071 | 23.778 | 1.00 | 0.00 |

PEDF\_P1\_final\_docking\_model.txt

|      |      |      |     |   |     |        |        |        |      |      |
|------|------|------|-----|---|-----|--------|--------|--------|------|------|
| ATOM | 4596 | CB   | GLU | A | 322 | 39.035 | 42.608 | 22.438 | 1.00 | 0.00 |
| ATOM | 4597 | CG   | GLU | A | 322 | 38.461 | 43.844 | 21.761 | 1.00 | 0.00 |
| ATOM | 4598 | CD   | GLU | A | 322 | 39.214 | 45.083 | 22.157 | 1.00 | 0.00 |
| ATOM | 4599 | OE1  | GLU | A | 322 | 40.289 | 44.957 | 22.693 | 1.00 | 0.00 |
| ATOM | 4600 | OE2  | GLU | A | 322 | 38.769 | 46.157 | 21.825 | 1.00 | 0.00 |
| ATOM | 4601 | H    | GLU | A | 322 | 36.796 | 40.748 | 23.146 | 1.00 | 0.00 |
| ATOM | 4602 | HA   | GLU | A | 322 | 38.594 | 41.255 | 20.848 | 1.00 | 0.00 |
| ATOM | 4603 | 1HB  | GLU | A | 322 | 38.831 | 42.654 | 23.508 | 1.00 | 0.00 |
| ATOM | 4604 | 2HB  | GLU | A | 322 | 40.112 | 42.571 | 22.274 | 1.00 | 0.00 |
| ATOM | 4605 | 1HG  | GLU | A | 322 | 38.433 | 43.769 | 20.674 | 1.00 | 0.00 |
| ATOM | 4606 | 2HG  | GLU | A | 322 | 37.444 | 43.899 | 22.146 | 1.00 | 0.00 |
| ATOM | 4607 | N    | GLY | A | 323 | 39.521 | 39.122 | 21.765 | 1.00 | 0.00 |
| ATOM | 4608 | CA   | GLY | A | 323 | 40.172 | 37.966 | 22.330 | 1.00 | 0.00 |
| ATOM | 4609 | C    | GLY | A | 323 | 41.084 | 37.268 | 21.357 | 1.00 | 0.00 |
| ATOM | 4610 | O    | GLY | A | 323 | 41.451 | 37.815 | 20.321 | 1.00 | 0.00 |
| ATOM | 4611 | H    | GLY | A | 323 | 39.365 | 39.161 | 20.768 | 1.00 | 0.00 |
| ATOM | 4612 | 1HA  | GLY | A | 323 | 40.768 | 38.277 | 23.188 | 1.00 | 0.00 |
| ATOM | 4613 | 2HA  | GLY | A | 323 | 39.414 | 37.253 | 22.654 | 1.00 | 0.00 |
| ATOM | 4614 | N    | GLU | A | 324 | 41.457 | 36.048 | 21.713 | 1.00 | 0.00 |
| ATOM | 4615 | CA   | GLU | A | 324 | 42.320 | 35.233 | 20.887 | 1.00 | 0.00 |
| ATOM | 4616 | C    | GLU | A | 324 | 41.557 | 33.950 | 20.567 | 1.00 | 0.00 |
| ATOM | 4617 | O    | GLU | A | 324 | 40.974 | 33.327 | 21.452 | 1.00 | 0.00 |
| ATOM | 4618 | CB   | GLU | A | 324 | 43.645 | 34.932 | 21.590 | 1.00 | 0.00 |
| ATOM | 4619 | CG   | GLU | A | 324 | 44.517 | 36.154 | 21.840 | 1.00 | 0.00 |
| ATOM | 4620 | CD   | GLU | A | 324 | 44.087 | 36.888 | 23.080 | 1.00 | 0.00 |
| ATOM | 4621 | OE1  | GLU | A | 324 | 43.277 | 36.364 | 23.806 | 1.00 | 0.00 |
| ATOM | 4622 | OE2  | GLU | A | 324 | 44.650 | 37.919 | 23.361 | 1.00 | 0.00 |
| ATOM | 4623 | H    | GLU | A | 324 | 41.125 | 35.678 | 22.592 | 1.00 | 0.00 |
| ATOM | 4624 | HA   | GLU | A | 324 | 42.541 | 35.755 | 19.955 | 1.00 | 0.00 |
| ATOM | 4625 | 1HB  | GLU | A | 324 | 43.400 | 34.461 | 22.543 | 1.00 | 0.00 |
| ATOM | 4626 | 2HB  | GLU | A | 324 | 44.186 | 34.223 | 20.963 | 1.00 | 0.00 |
| ATOM | 4627 | 1HG  | GLU | A | 324 | 45.580 | 35.923 | 21.906 | 1.00 | 0.00 |
| ATOM | 4628 | 2HG  | GLU | A | 324 | 44.336 | 36.780 | 20.967 | 1.00 | 0.00 |
| ATOM | 4629 | N    | VAL | A | 325 | 41.545 | 33.570 | 19.296 | 1.00 | 0.00 |
| ATOM | 4630 | CA   | VAL | A | 325 | 40.849 | 32.366 | 18.866 | 1.00 | 0.00 |
| ATOM | 4631 | C    | VAL | A | 325 | 41.864 | 31.315 | 18.407 | 1.00 | 0.00 |
| ATOM | 4632 | O    | VAL | A | 325 | 41.568 | 30.477 | 17.557 | 1.00 | 0.00 |
| ATOM | 4633 | CB   | VAL | A | 325 | 39.856 | 32.657 | 17.726 | 1.00 | 0.00 |
| ATOM | 4634 | CG1  | VAL | A | 325 | 38.739 | 33.569 | 18.212 | 1.00 | 0.00 |
| ATOM | 4635 | CG2  | VAL | A | 325 | 40.574 | 33.283 | 16.540 | 1.00 | 0.00 |
| ATOM | 4636 | H    | VAL | A | 325 | 42.031 | 34.129 | 18.609 | 1.00 | 0.00 |
| ATOM | 4637 | HA   | VAL | A | 325 | 40.303 | 31.907 | 19.691 | 1.00 | 0.00 |
| ATOM | 4638 | HB   | VAL | A | 325 | 39.430 | 31.716 | 17.377 | 1.00 | 0.00 |
| ATOM | 4639 | 1HG1 | VAL | A | 325 | 38.045 | 33.764 | 17.393 | 1.00 | 0.00 |
| ATOM | 4640 | 2HG1 | VAL | A | 325 | 38.205 | 33.086 | 19.031 | 1.00 | 0.00 |
| ATOM | 4641 | 3HG1 | VAL | A | 325 | 39.163 | 34.510 | 18.559 | 1.00 | 0.00 |
| ATOM | 4642 | 1HG2 | VAL | A | 325 | 39.857 | 33.482 | 15.743 | 1.00 | 0.00 |
| ATOM | 4643 | 2HG2 | VAL | A | 325 | 41.040 | 34.218 | 16.851 | 1.00 | 0.00 |
| ATOM | 4644 | 3HG2 | VAL | A | 325 | 41.340 | 32.599 | 16.176 | 1.00 | 0.00 |
| ATOM | 4645 | N    | THR | A | 326 | 43.063 | 31.366 | 18.981 | 1.00 | 0.00 |
| ATOM | 4646 | CA   | THR | A | 326 | 44.122 | 30.428 | 18.620 | 1.00 | 0.00 |
| ATOM | 4647 | C    | THR | A | 326 | 43.843 | 29.035 | 19.175 | 1.00 | 0.00 |
| ATOM | 4648 | O    | THR | A | 326 | 44.133 | 28.027 | 18.526 | 1.00 | 0.00 |
| ATOM | 4649 | CB   | THR | A | 326 | 45.495 | 30.905 | 19.128 | 1.00 | 0.00 |
| ATOM | 4650 | OG1  | THR | A | 326 | 45.890 | 32.083 | 18.412 | 1.00 | 0.00 |
| ATOM | 4651 | CG2  | THR | A | 326 | 46.543 | 29.821 | 18.929 | 1.00 | 0.00 |
| ATOM | 4652 | H    | THR | A | 326 | 43.247 | 32.069 | 19.683 | 1.00 | 0.00 |
| ATOM | 4653 | HA   | THR | A | 326 | 44.168 | 30.323 | 17.536 | 1.00 | 0.00 |
| ATOM | 4654 | HB   | THR | A | 326 | 45.418 | 31.144 | 20.188 | 1.00 | 0.00 |
| ATOM | 4655 | HG1  | THR | A | 326 | 45.948 | 31.882 | 17.475 | 1.00 | 0.00 |
| ATOM | 4656 | 1HG2 | THR | A | 326 | 47.507 | 30.176 | 19.294 | 1.00 | 0.00 |
| ATOM | 4657 | 2HG2 | THR | A | 326 | 46.252 | 28.928 | 19.482 | 1.00 | 0.00 |
| ATOM | 4658 | 3HG2 | THR | A | 326 | 46.622 | 29.582 | 17.869 | 1.00 | 0.00 |

PEDF\_P1\_final\_docking\_model.txt

|      |      |      |     |   |     |        |        |        |      |      |
|------|------|------|-----|---|-----|--------|--------|--------|------|------|
| ATOM | 4659 | N    | LYS | A | 327 | 43.289 | 28.981 | 20.382 | 1.00 | 0.00 |
| ATOM | 4660 | CA   | LYS | A | 327 | 42.985 | 27.702 | 21.005 | 1.00 | 0.00 |
| ATOM | 4661 | C    | LYS | A | 327 | 41.834 | 27.019 | 20.281 | 1.00 | 0.00 |
| ATOM | 4662 | O    | LYS | A | 327 | 41.770 | 25.791 | 20.225 | 1.00 | 0.00 |
| ATOM | 4663 | CB   | LYS | A | 327 | 42.646 | 27.888 | 22.485 | 1.00 | 0.00 |
| ATOM | 4664 | CG   | LYS | A | 327 | 42.386 | 26.591 | 23.239 | 1.00 | 0.00 |
| ATOM | 4665 | CD   | LYS | A | 327 | 42.155 | 26.849 | 24.720 | 1.00 | 0.00 |
| ATOM | 4666 | CE   | LYS | A | 327 | 41.898 | 25.553 | 25.475 | 1.00 | 0.00 |
| ATOM | 4667 | NZ   | LYS | A | 327 | 41.683 | 25.789 | 26.929 | 1.00 | 0.00 |
| ATOM | 4668 | H    | LYS | A | 327 | 43.074 | 29.834 | 20.879 | 1.00 | 0.00 |
| ATOM | 4669 | HA   | LYS | A | 327 | 43.848 | 27.040 | 20.929 | 1.00 | 0.00 |
| ATOM | 4670 | 1HB  | LYS | A | 327 | 43.487 | 28.411 | 22.941 | 1.00 | 0.00 |
| ATOM | 4671 | 2HB  | LYS | A | 327 | 41.758 | 28.519 | 22.533 | 1.00 | 0.00 |
| ATOM | 4672 | 1HG  | LYS | A | 327 | 41.505 | 26.112 | 22.811 | 1.00 | 0.00 |
| ATOM | 4673 | 2HG  | LYS | A | 327 | 43.250 | 25.939 | 23.114 | 1.00 | 0.00 |
| ATOM | 4674 | 1HD  | LYS | A | 327 | 43.039 | 27.340 | 25.130 | 1.00 | 0.00 |
| ATOM | 4675 | 2HD  | LYS | A | 327 | 41.293 | 27.508 | 24.828 | 1.00 | 0.00 |
| ATOM | 4676 | 1HE  | LYS | A | 327 | 41.015 | 25.079 | 25.050 | 1.00 | 0.00 |
| ATOM | 4677 | 2HE  | LYS | A | 327 | 42.761 | 24.901 | 25.337 | 1.00 | 0.00 |
| ATOM | 4678 | 1HZ  | LYS | A | 327 | 41.517 | 24.906 | 27.392 | 1.00 | 0.00 |
| ATOM | 4679 | 2HZ  | LYS | A | 327 | 42.503 | 26.227 | 27.324 | 1.00 | 0.00 |
| ATOM | 4680 | 3HZ  | LYS | A | 327 | 40.884 | 26.392 | 27.057 | 1.00 | 0.00 |
| ATOM | 4681 | N    | SER | A | 328 | 40.932 | 27.824 | 19.725 | 1.00 | 0.00 |
| ATOM | 4682 | CA   | SER | A | 328 | 39.782 | 27.305 | 18.991 | 1.00 | 0.00 |
| ATOM | 4683 | C    | SER | A | 328 | 40.264 | 26.666 | 17.695 | 1.00 | 0.00 |
| ATOM | 4684 | O    | SER | A | 328 | 39.924 | 25.523 | 17.377 | 1.00 | 0.00 |
| ATOM | 4685 | CB   | SER | A | 328 | 38.781 | 28.409 | 18.710 | 1.00 | 0.00 |
| ATOM | 4686 | OG   | SER | A | 328 | 38.193 | 28.897 | 19.884 | 1.00 | 0.00 |
| ATOM | 4687 | H    | SER | A | 328 | 41.048 | 28.823 | 19.815 | 1.00 | 0.00 |
| ATOM | 4688 | HA   | SER | A | 328 | 39.173 | 26.612 | 19.574 | 1.00 | 0.00 |
| ATOM | 4689 | 1HB  | SER | A | 328 | 39.297 | 29.226 | 18.205 | 1.00 | 0.00 |
| ATOM | 4690 | 2HB  | SER | A | 328 | 38.001 | 28.016 | 18.059 | 1.00 | 0.00 |
| ATOM | 4691 | HG   | SER | A | 328 | 37.568 | 29.592 | 19.662 | 1.00 | 0.00 |
| ATOM | 4692 | N    | LEU | A | 329 | 41.064 | 27.415 | 16.950 | 1.00 | 0.00 |
| ATOM | 4693 | CA   | LEU | A | 329 | 41.579 | 26.921 | 15.696 | 1.00 | 0.00 |
| ATOM | 4694 | C    | LEU | A | 329 | 42.407 | 25.666 | 15.907 | 1.00 | 0.00 |
| ATOM | 4695 | O    | LEU | A | 329 | 42.430 | 24.785 | 15.054 | 1.00 | 0.00 |
| ATOM | 4696 | CB   | LEU | A | 329 | 42.389 | 28.001 | 14.984 | 1.00 | 0.00 |
| ATOM | 4697 | CG   | LEU | A | 329 | 41.501 | 29.147 | 14.500 | 1.00 | 0.00 |
| ATOM | 4698 | CD1  | LEU | A | 329 | 42.313 | 30.264 | 13.848 | 1.00 | 0.00 |
| ATOM | 4699 | CD2  | LEU | A | 329 | 40.391 | 28.646 | 13.578 | 1.00 | 0.00 |
| ATOM | 4700 | H    | LEU | A | 329 | 41.321 | 28.343 | 17.256 | 1.00 | 0.00 |
| ATOM | 4701 | HA   | LEU | A | 329 | 40.751 | 26.641 | 15.046 | 1.00 | 0.00 |
| ATOM | 4702 | 1HB  | LEU | A | 329 | 43.027 | 28.316 | 15.808 | 1.00 | 0.00 |
| ATOM | 4703 | 2HB  | LEU | A | 329 | 43.005 | 27.584 | 14.187 | 1.00 | 0.00 |
| ATOM | 4704 | HG   | LEU | A | 329 | 41.015 | 29.573 | 15.378 | 1.00 | 0.00 |
| ATOM | 4705 | 1HD1 | LEU | A | 329 | 41.642 | 31.058 | 13.519 | 1.00 | 0.00 |
| ATOM | 4706 | 2HD1 | LEU | A | 329 | 43.023 | 30.667 | 14.570 | 1.00 | 0.00 |
| ATOM | 4707 | 3HD1 | LEU | A | 329 | 42.853 | 29.867 | 12.989 | 1.00 | 0.00 |
| ATOM | 4708 | 1HD2 | LEU | A | 329 | 39.779 | 29.489 | 13.254 | 1.00 | 0.00 |
| ATOM | 4709 | 2HD2 | LEU | A | 329 | 40.832 | 28.161 | 12.707 | 1.00 | 0.00 |
| ATOM | 4710 | 3HD2 | LEU | A | 329 | 39.767 | 27.931 | 14.114 | 1.00 | 0.00 |
| ATOM | 4711 | N    | GLN | A | 330 | 43.072 | 25.564 | 17.052 | 1.00 | 0.00 |
| ATOM | 4712 | CA   | GLN | A | 330 | 43.900 | 24.396 | 17.312 | 1.00 | 0.00 |
| ATOM | 4713 | C    | GLN | A | 330 | 43.107 | 23.101 | 17.339 | 1.00 | 0.00 |
| ATOM | 4714 | O    | GLN | A | 330 | 43.598 | 22.062 | 16.886 | 1.00 | 0.00 |
| ATOM | 4715 | CB   | GLN | A | 330 | 44.639 | 24.563 | 18.643 | 1.00 | 0.00 |
| ATOM | 4716 | CG   | GLN | A | 330 | 45.591 | 23.427 | 18.973 | 1.00 | 0.00 |
| ATOM | 4717 | CD   | GLN | A | 330 | 46.361 | 23.672 | 20.257 | 1.00 | 0.00 |
| ATOM | 4718 | OE1  | GLN | A | 330 | 46.161 | 24.684 | 20.934 | 1.00 | 0.00 |
| ATOM | 4719 | NE2  | GLN | A | 330 | 47.250 | 22.746 | 20.598 | 1.00 | 0.00 |
| ATOM | 4720 | H    | GLN | A | 330 | 43.012 | 26.290 | 17.751 | 1.00 | 0.00 |
| ATOM | 4721 | HA   | GLN | A | 330 | 44.624 | 24.275 | 16.507 | 1.00 | 0.00 |

PEDF\_P1\_final\_docking\_model.txt

|      |      |      |     |   |     |        |        |        |      |      |
|------|------|------|-----|---|-----|--------|--------|--------|------|------|
| ATOM | 4722 | 1HB  | GLN | A | 330 | 45.191 | 25.501 | 18.580 | 1.00 | 0.00 |
| ATOM | 4723 | 2HB  | GLN | A | 330 | 43.877 | 24.642 | 19.418 | 1.00 | 0.00 |
| ATOM | 4724 | 1HG  | GLN | A | 330 | 45.287 | 22.380 | 18.959 | 1.00 | 0.00 |
| ATOM | 4725 | 2HG  | GLN | A | 330 | 46.255 | 23.622 | 18.130 | 1.00 | 0.00 |
| ATOM | 4726 | 1HE2 | GLN | A | 330 | 47.789 | 22.854 | 21.435 | 1.00 | 0.00 |
| ATOM | 4727 | 2HE2 | GLN | A | 330 | 47.382 | 21.941 | 20.019 | 1.00 | 0.00 |
| ATOM | 4728 | N    | GLU | A | 331 | 41.885 | 23.142 | 17.858 | 1.00 | 0.00 |
| ATOM | 4729 | CA   | GLU | A | 331 | 41.087 | 21.928 | 17.863 | 1.00 | 0.00 |
| ATOM | 4730 | C    | GLU | A | 331 | 40.067 | 21.976 | 16.741 | 1.00 | 0.00 |
| ATOM | 4731 | O    | GLU | A | 331 | 38.917 | 21.574 | 16.899 | 1.00 | 0.00 |
| ATOM | 4732 | CB   | GLU | A | 331 | 40.389 | 21.740 | 19.212 | 1.00 | 0.00 |
| ATOM | 4733 | CG   | GLU | A | 331 | 41.317 | 21.341 | 20.350 | 1.00 | 0.00 |
| ATOM | 4734 | CD   | GLU | A | 331 | 40.556 | 21.149 | 21.633 | 1.00 | 0.00 |
| ATOM | 4735 | OE1  | GLU | A | 331 | 39.354 | 21.260 | 21.611 | 1.00 | 0.00 |
| ATOM | 4736 | OE2  | GLU | A | 331 | 41.164 | 20.781 | 22.611 | 1.00 | 0.00 |
| ATOM | 4737 | H    | GLU | A | 331 | 41.495 | 23.988 | 18.248 | 1.00 | 0.00 |
| ATOM | 4738 | HA   | GLU | A | 331 | 41.727 | 21.064 | 17.683 | 1.00 | 0.00 |
| ATOM | 4739 | 1HB  | GLU | A | 331 | 39.904 | 22.686 | 19.454 | 1.00 | 0.00 |
| ATOM | 4740 | 2HB  | GLU | A | 331 | 39.631 | 20.969 | 19.074 | 1.00 | 0.00 |
| ATOM | 4741 | 1HG  | GLU | A | 331 | 41.902 | 20.446 | 20.139 | 1.00 | 0.00 |
| ATOM | 4742 | 2HG  | GLU | A | 331 | 41.984 | 22.195 | 20.448 | 1.00 | 0.00 |
| ATOM | 4743 | N    | MET | A | 332 | 40.515 | 22.488 | 15.599 | 1.00 | 0.00 |
| ATOM | 4744 | CA   | MET | A | 332 | 39.698 | 22.587 | 14.396 | 1.00 | 0.00 |
| ATOM | 4745 | C    | MET | A | 332 | 40.515 | 22.029 | 13.250 | 1.00 | 0.00 |
| ATOM | 4746 | O    | MET | A | 332 | 40.463 | 22.529 | 12.129 | 1.00 | 0.00 |
| ATOM | 4747 | CB   | MET | A | 332 | 39.297 | 24.027 | 14.077 | 1.00 | 0.00 |
| ATOM | 4748 | CG   | MET | A | 332 | 38.144 | 24.534 | 14.938 | 1.00 | 0.00 |
| ATOM | 4749 | SD   | MET | A | 332 | 37.693 | 26.228 | 14.543 | 1.00 | 0.00 |
| ATOM | 4750 | CE   | MET | A | 332 | 37.351 | 25.974 | 12.796 | 1.00 | 0.00 |
| ATOM | 4751 | H    | MET | A | 332 | 41.468 | 22.821 | 15.575 | 1.00 | 0.00 |
| ATOM | 4752 | HA   | MET | A | 332 | 38.793 | 21.991 | 14.511 | 1.00 | 0.00 |
| ATOM | 4753 | 1HB  | MET | A | 332 | 40.181 | 24.644 | 14.233 | 1.00 | 0.00 |
| ATOM | 4754 | 2HB  | MET | A | 332 | 39.016 | 24.053 | 13.023 | 1.00 | 0.00 |
| ATOM | 4755 | 1HG  | MET | A | 332 | 37.286 | 23.884 | 14.774 | 1.00 | 0.00 |
| ATOM | 4756 | 2HG  | MET | A | 332 | 38.450 | 24.476 | 15.982 | 1.00 | 0.00 |
| ATOM | 4757 | 1HE  | MET | A | 332 | 37.047 | 26.918 | 12.343 | 1.00 | 0.00 |
| ATOM | 4758 | 2HE  | MET | A | 332 | 38.249 | 25.605 | 12.299 | 1.00 | 0.00 |
| ATOM | 4759 | 3HE  | MET | A | 332 | 36.549 | 25.243 | 12.685 | 1.00 | 0.00 |
| ATOM | 4760 | N    | LYS | A | 333 | 41.271 | 20.979 | 13.559 | 1.00 | 0.00 |
| ATOM | 4761 | CA   | LYS | A | 333 | 42.132 | 20.316 | 12.594 | 1.00 | 0.00 |
| ATOM | 4762 | C    | LYS | A | 333 | 43.063 | 21.329 | 11.940 | 1.00 | 0.00 |
| ATOM | 4763 | O    | LYS | A | 333 | 43.269 | 21.326 | 10.722 | 1.00 | 0.00 |
| ATOM | 4764 | CB   | LYS | A | 333 | 41.301 | 19.592 | 11.534 | 1.00 | 0.00 |
| ATOM | 4765 | CG   | LYS | A | 333 | 40.411 | 18.483 | 12.081 | 1.00 | 0.00 |
| ATOM | 4766 | CD   | LYS | A | 333 | 39.625 | 17.805 | 10.969 | 1.00 | 0.00 |
| ATOM | 4767 | CE   | LYS | A | 333 | 38.697 | 16.733 | 11.521 | 1.00 | 0.00 |
| ATOM | 4768 | NZ   | LYS | A | 333 | 37.853 | 16.126 | 10.456 | 1.00 | 0.00 |
| ATOM | 4769 | H    | LYS | A | 333 | 41.239 | 20.634 | 14.508 | 1.00 | 0.00 |
| ATOM | 4770 | HA   | LYS | A | 333 | 42.759 | 19.582 | 13.102 | 1.00 | 0.00 |
| ATOM | 4771 | 1HB  | LYS | A | 333 | 40.682 | 20.344 | 11.044 | 1.00 | 0.00 |
| ATOM | 4772 | 2HB  | LYS | A | 333 | 42.000 | 19.171 | 10.811 | 1.00 | 0.00 |
| ATOM | 4773 | 1HG  | LYS | A | 333 | 41.042 | 17.748 | 12.582 | 1.00 | 0.00 |
| ATOM | 4774 | 2HG  | LYS | A | 333 | 39.719 | 18.918 | 12.802 | 1.00 | 0.00 |
| ATOM | 4775 | 1HD  | LYS | A | 333 | 39.038 | 18.562 | 10.447 | 1.00 | 0.00 |
| ATOM | 4776 | 2HD  | LYS | A | 333 | 40.330 | 17.350 | 10.273 | 1.00 | 0.00 |
| ATOM | 4777 | 1HE  | LYS | A | 333 | 39.306 | 15.959 | 11.986 | 1.00 | 0.00 |
| ATOM | 4778 | 2HE  | LYS | A | 333 | 38.056 | 17.191 | 12.275 | 1.00 | 0.00 |
| ATOM | 4779 | 1HZ  | LYS | A | 333 | 37.253 | 15.422 | 10.863 | 1.00 | 0.00 |
| ATOM | 4780 | 2HZ  | LYS | A | 333 | 37.286 | 16.843 | 10.026 | 1.00 | 0.00 |
| ATOM | 4781 | 3HZ  | LYS | A | 333 | 38.446 | 15.701 | 9.758  | 1.00 | 0.00 |
| ATOM | 4782 | N    | LEU | A | 334 | 43.638 | 22.189 | 12.771 | 1.00 | 0.00 |
| ATOM | 4783 | CA   | LEU | A | 334 | 44.539 | 23.214 | 12.288 | 1.00 | 0.00 |
| ATOM | 4784 | C    | LEU | A | 334 | 45.793 | 23.296 | 13.154 | 1.00 | 0.00 |

PEDF\_P1\_final\_docking\_model.txt

|      |      |      |     |   |     |        |        |        |      |      |
|------|------|------|-----|---|-----|--------|--------|--------|------|------|
| ATOM | 4785 | O    | LEU | A | 334 | 46.552 | 24.258 | 13.068 | 1.00 | 0.00 |
| ATOM | 4786 | CB   | LEU | A | 334 | 43.821 | 24.569 | 12.249 | 1.00 | 0.00 |
| ATOM | 4787 | CG   | LEU | A | 334 | 42.786 | 24.727 | 11.128 | 1.00 | 0.00 |
| ATOM | 4788 | CD1  | LEU | A | 334 | 41.980 | 26.002 | 11.337 | 1.00 | 0.00 |
| ATOM | 4789 | CD2  | LEU | A | 334 | 43.494 | 24.752 | 9.781  | 1.00 | 0.00 |
| ATOM | 4790 | H    | LEU | A | 334 | 43.445 | 22.130 | 13.761 | 1.00 | 0.00 |
| ATOM | 4791 | HA   | LEU | A | 334 | 44.874 | 22.961 | 11.283 | 1.00 | 0.00 |
| ATOM | 4792 | 1HB  | LEU | A | 334 | 43.322 | 24.533 | 13.216 | 1.00 | 0.00 |
| ATOM | 4793 | 2HB  | LEU | A | 334 | 44.527 | 25.399 | 12.235 | 1.00 | 0.00 |
| ATOM | 4794 | HG   | LEU | A | 334 | 42.146 | 23.845 | 11.151 | 1.00 | 0.00 |
| ATOM | 4795 | 1HD1 | LEU | A | 334 | 41.248 | 26.106 | 10.536 | 1.00 | 0.00 |
| ATOM | 4796 | 2HD1 | LEU | A | 334 | 41.463 | 25.952 | 12.296 | 1.00 | 0.00 |
| ATOM | 4797 | 3HD1 | LEU | A | 334 | 42.650 | 26.861 | 11.329 | 1.00 | 0.00 |
| ATOM | 4798 | 1HD2 | LEU | A | 334 | 42.758 | 24.864 | 8.985  | 1.00 | 0.00 |
| ATOM | 4799 | 2HD2 | LEU | A | 334 | 44.191 | 25.590 | 9.752  | 1.00 | 0.00 |
| ATOM | 4800 | 3HD2 | LEU | A | 334 | 44.042 | 23.820 | 9.640  | 1.00 | 0.00 |
| ATOM | 4801 | N    | GLN | A | 335 | 46.009 | 22.276 | 13.981 | 1.00 | 0.00 |
| ATOM | 4802 | CA   | GLN | A | 335 | 47.173 | 22.226 | 14.860 | 1.00 | 0.00 |
| ATOM | 4803 | C    | GLN | A | 335 | 48.496 | 22.319 | 14.104 | 1.00 | 0.00 |
| ATOM | 4804 | O    | GLN | A | 335 | 49.431 | 23.001 | 14.534 | 1.00 | 0.00 |
| ATOM | 4805 | CB   | GLN | A | 335 | 47.151 | 20.936 | 15.684 | 1.00 | 0.00 |
| ATOM | 4806 | CG   | GLN | A | 335 | 48.295 | 20.810 | 16.675 | 1.00 | 0.00 |
| ATOM | 4807 | CD   | GLN | A | 335 | 48.213 | 19.536 | 17.495 | 1.00 | 0.00 |
| ATOM | 4808 | OE1  | GLN | A | 335 | 47.339 | 18.694 | 17.273 | 1.00 | 0.00 |
| ATOM | 4809 | NE2  | GLN | A | 335 | 49.123 | 19.390 | 18.451 | 1.00 | 0.00 |
| ATOM | 4810 | H    | GLN | A | 335 | 45.346 | 21.514 | 13.999 | 1.00 | 0.00 |
| ATOM | 4811 | HA   | GLN | A | 335 | 47.162 | 23.086 | 15.530 | 1.00 | 0.00 |
| ATOM | 4812 | 1HB  | GLN | A | 335 | 46.199 | 20.917 | 16.215 | 1.00 | 0.00 |
| ATOM | 4813 | 2HB  | GLN | A | 335 | 47.186 | 20.109 | 14.974 | 1.00 | 0.00 |
| ATOM | 4814 | 1HG  | GLN | A | 335 | 49.337 | 20.961 | 16.395 | 1.00 | 0.00 |
| ATOM | 4815 | 2HG  | GLN | A | 335 | 47.963 | 21.642 | 17.296 | 1.00 | 0.00 |
| ATOM | 4816 | 1HE2 | GLN | A | 335 | 49.118 | 18.570 | 19.025 | 1.00 | 0.00 |
| ATOM | 4817 | 2HE2 | GLN | A | 335 | 49.813 | 20.099 | 18.598 | 1.00 | 0.00 |
| ATOM | 4818 | N    | SER | A | 336 | 48.561 | 21.616 | 12.979 | 1.00 | 0.00 |
| ATOM | 4819 | CA   | SER | A | 336 | 49.742 | 21.578 | 12.131 | 1.00 | 0.00 |
| ATOM | 4820 | C    | SER | A | 336 | 50.412 | 22.937 | 11.878 | 1.00 | 0.00 |
| ATOM | 4821 | O    | SER | A | 336 | 51.631 | 23.004 | 11.704 | 1.00 | 0.00 |
| ATOM | 4822 | CB   | SER | A | 336 | 49.369 | 20.940 | 10.807 | 1.00 | 0.00 |
| ATOM | 4823 | OG   | SER | A | 336 | 48.938 | 19.616 | 10.964 | 1.00 | 0.00 |
| ATOM | 4824 | H    | SER | A | 336 | 47.745 | 21.086 | 12.709 | 1.00 | 0.00 |
| ATOM | 4825 | HA   | SER | A | 336 | 50.518 | 20.906 | 12.500 | 1.00 | 0.00 |
| ATOM | 4826 | 1HB  | SER | A | 336 | 48.567 | 21.522 | 10.354 | 1.00 | 0.00 |
| ATOM | 4827 | 2HB  | SER | A | 336 | 50.241 | 20.954 | 10.155 | 1.00 | 0.00 |
| ATOM | 4828 | HG   | SER | A | 336 | 48.712 | 19.250 | 10.106 | 1.00 | 0.00 |
| ATOM | 4829 | N    | LEU | A | 337 | 49.623 | 24.010 | 11.857 | 1.00 | 0.00 |
| ATOM | 4830 | CA   | LEU | A | 337 | 50.146 | 25.358 | 11.609 | 1.00 | 0.00 |
| ATOM | 4831 | C    | LEU | A | 337 | 50.938 | 25.968 | 12.772 | 1.00 | 0.00 |
| ATOM | 4832 | O    | LEU | A | 337 | 51.806 | 26.816 | 12.555 | 1.00 | 0.00 |
| ATOM | 4833 | CB   | LEU | A | 337 | 48.983 | 26.288 | 11.240 | 1.00 | 0.00 |
| ATOM | 4834 | CG   | LEU | A | 337 | 48.184 | 25.873 | 9.998  | 1.00 | 0.00 |
| ATOM | 4835 | CD1  | LEU | A | 337 | 46.986 | 26.795 | 9.816  | 1.00 | 0.00 |
| ATOM | 4836 | CD2  | LEU | A | 337 | 49.088 | 25.914 | 8.775  | 1.00 | 0.00 |
| ATOM | 4837 | H    | LEU | A | 337 | 48.633 | 23.888 | 12.017 | 1.00 | 0.00 |
| ATOM | 4838 | HA   | LEU | A | 337 | 50.861 | 25.327 | 10.787 | 1.00 | 0.00 |
| ATOM | 4839 | 1HB  | LEU | A | 337 | 48.372 | 26.170 | 12.134 | 1.00 | 0.00 |
| ATOM | 4840 | 2HB  | LEU | A | 337 | 49.307 | 27.325 | 11.155 | 1.00 | 0.00 |
| ATOM | 4841 | HG   | LEU | A | 337 | 47.870 | 24.839 | 10.145 | 1.00 | 0.00 |
| ATOM | 4842 | 1HD1 | LEU | A | 337 | 46.425 | 26.493 | 8.931  | 1.00 | 0.00 |
| ATOM | 4843 | 2HD1 | LEU | A | 337 | 46.342 | 26.732 | 10.692 | 1.00 | 0.00 |
| ATOM | 4844 | 3HD1 | LEU | A | 337 | 47.332 | 27.820 | 9.692  | 1.00 | 0.00 |
| ATOM | 4845 | 1HD2 | LEU | A | 337 | 48.519 | 25.619 | 7.893  | 1.00 | 0.00 |
| ATOM | 4846 | 2HD2 | LEU | A | 337 | 49.470 | 26.926 | 8.638  | 1.00 | 0.00 |
| ATOM | 4847 | 3HD2 | LEU | A | 337 | 49.923 | 25.227 | 8.915  | 1.00 | 0.00 |

PEDF\_P1\_final\_docking\_model.txt

|      |      |     |     |   |     |        |        |        |      |      |
|------|------|-----|-----|---|-----|--------|--------|--------|------|------|
| ATOM | 4848 | N   | PHE | A | 338 | 50.628 | 25.547 | 13.997 | 1.00 | 0.00 |
| ATOM | 4849 | CA  | PHE | A | 338 | 51.308 | 26.063 | 15.186 | 1.00 | 0.00 |
| ATOM | 4850 | C   | PHE | A | 338 | 52.535 | 25.239 | 15.518 | 1.00 | 0.00 |
| ATOM | 4851 | O   | PHE | A | 338 | 53.383 | 25.650 | 16.315 | 1.00 | 0.00 |
| ATOM | 4852 | CB  | PHE | A | 338 | 50.341 | 26.048 | 16.376 | 1.00 | 0.00 |
| ATOM | 4853 | CG  | PHE | A | 338 | 49.023 | 26.701 | 16.018 | 1.00 | 0.00 |
| ATOM | 4854 | CD1 | PHE | A | 338 | 47.981 | 25.941 | 15.495 | 1.00 | 0.00 |
| ATOM | 4855 | CD2 | PHE | A | 338 | 48.846 | 28.064 | 16.217 | 1.00 | 0.00 |
| ATOM | 4856 | CE1 | PHE | A | 338 | 46.771 | 26.542 | 15.168 | 1.00 | 0.00 |
| ATOM | 4857 | CE2 | PHE | A | 338 | 47.635 | 28.664 | 15.893 | 1.00 | 0.00 |
| ATOM | 4858 | CZ  | PHE | A | 338 | 46.596 | 27.905 | 15.368 | 1.00 | 0.00 |
| ATOM | 4859 | H   | PHE | A | 338 | 49.903 | 24.852 | 14.107 | 1.00 | 0.00 |
| ATOM | 4860 | HA  | PHE | A | 338 | 51.657 | 27.080 | 15.001 | 1.00 | 0.00 |
| ATOM | 4861 | 1HB | PHE | A | 338 | 50.136 | 25.022 | 16.681 | 1.00 | 0.00 |
| ATOM | 4862 | 2HB | PHE | A | 338 | 50.770 | 26.596 | 17.214 | 1.00 | 0.00 |
| ATOM | 4863 | HD1 | PHE | A | 338 | 48.125 | 24.871 | 15.346 | 1.00 | 0.00 |
| ATOM | 4864 | HD2 | PHE | A | 338 | 49.659 | 28.664 | 16.628 | 1.00 | 0.00 |
| ATOM | 4865 | HE1 | PHE | A | 338 | 45.960 | 25.943 | 14.755 | 1.00 | 0.00 |
| ATOM | 4866 | HE2 | PHE | A | 338 | 47.501 | 29.734 | 16.051 | 1.00 | 0.00 |
| ATOM | 4867 | HZ  | PHE | A | 338 | 45.648 | 28.377 | 15.113 | 1.00 | 0.00 |
| ATOM | 4868 | N   | ASP | A | 339 | 52.610 | 24.066 | 14.904 | 1.00 | 0.00 |
| ATOM | 4869 | CA  | ASP | A | 339 | 53.713 | 23.151 | 15.106 | 1.00 | 0.00 |
| ATOM | 4870 | C   | ASP | A | 339 | 54.867 | 23.510 | 14.168 | 1.00 | 0.00 |
| ATOM | 4871 | O   | ASP | A | 339 | 55.651 | 24.407 | 14.458 | 1.00 | 0.00 |
| ATOM | 4872 | CB  | ASP | A | 339 | 53.263 | 21.706 | 14.880 | 1.00 | 0.00 |
| ATOM | 4873 | CG  | ASP | A | 339 | 52.374 | 21.144 | 15.981 | 1.00 | 0.00 |
| ATOM | 4874 | OD1 | ASP | A | 339 | 52.284 | 21.759 | 17.017 | 1.00 | 0.00 |
| ATOM | 4875 | OD2 | ASP | A | 339 | 51.673 | 20.194 | 15.725 | 1.00 | 0.00 |
| ATOM | 4876 | H   | ASP | A | 339 | 51.866 | 23.807 | 14.272 | 1.00 | 0.00 |
| ATOM | 4877 | HA  | ASP | A | 339 | 54.087 | 23.243 | 16.126 | 1.00 | 0.00 |
| ATOM | 4878 | 1HB | ASP | A | 339 | 52.787 | 21.545 | 13.912 | 1.00 | 0.00 |
| ATOM | 4879 | 2HB | ASP | A | 339 | 54.228 | 21.199 | 14.899 | 1.00 | 0.00 |
| ATOM | 4880 | N   | SER | A | 340 | 54.964 | 22.812 | 13.042 | 1.00 | 0.00 |
| ATOM | 4881 | CA  | SER | A | 340 | 56.030 | 23.067 | 12.076 | 1.00 | 0.00 |
| ATOM | 4882 | C   | SER | A | 340 | 55.480 | 23.109 | 10.653 | 1.00 | 0.00 |
| ATOM | 4883 | O   | SER | A | 340 | 55.662 | 22.175 | 9.870  | 1.00 | 0.00 |
| ATOM | 4884 | CB  | SER | A | 340 | 57.109 | 22.008 | 12.195 | 1.00 | 0.00 |
| ATOM | 4885 | OG  | SER | A | 340 | 58.234 | 22.314 | 11.418 | 1.00 | 0.00 |
| ATOM | 4886 | H   | SER | A | 340 | 54.287 | 22.088 | 12.848 | 1.00 | 0.00 |
| ATOM | 4887 | HA  | SER | A | 340 | 56.595 | 23.976 | 12.285 | 1.00 | 0.00 |
| ATOM | 4888 | 1HB | SER | A | 340 | 57.409 | 21.934 | 13.240 | 1.00 | 0.00 |
| ATOM | 4889 | 2HB | SER | A | 340 | 56.700 | 21.054 | 11.867 | 1.00 | 0.00 |
| ATOM | 4890 | HG  | SER | A | 340 | 58.891 | 21.621 | 11.522 | 1.00 | 0.00 |
| ATOM | 4891 | N   | PRO | A | 341 | 54.788 | 24.198 | 10.304 | 1.00 | 0.00 |
| ATOM | 4892 | CA  | PRO | A | 341 | 54.222 | 24.334 | 8.960  | 1.00 | 0.00 |
| ATOM | 4893 | C   | PRO | A | 341 | 55.319 | 24.666 | 7.957  | 1.00 | 0.00 |
| ATOM | 4894 | O   | PRO | A | 341 | 56.472 | 24.864 | 8.333  | 1.00 | 0.00 |
| ATOM | 4895 | CB  | PRO | A | 341 | 53.194 | 25.463 | 9.089  | 1.00 | 0.00 |
| ATOM | 4896 | CG  | PRO | A | 341 | 53.742 | 26.343 | 10.160 | 1.00 | 0.00 |
| ATOM | 4897 | CD  | PRO | A | 341 | 54.385 | 25.411 | 11.152 | 1.00 | 0.00 |
| ATOM | 4898 | HA  | PRO | A | 341 | 53.761 | 23.404 | 8.596  | 1.00 | 0.00 |
| ATOM | 4899 | 1HB | PRO | A | 341 | 53.078 | 26.012 | 8.143  | 1.00 | 0.00 |
| ATOM | 4900 | 2HB | PRO | A | 341 | 52.201 | 25.075 | 9.361  | 1.00 | 0.00 |
| ATOM | 4901 | 1HG | PRO | A | 341 | 54.475 | 27.055 | 9.754  | 1.00 | 0.00 |
| ATOM | 4902 | 2HG | PRO | A | 341 | 52.945 | 26.936 | 10.633 | 1.00 | 0.00 |
| ATOM | 4903 | 1HD | PRO | A | 341 | 55.273 | 25.856 | 11.626 | 1.00 | 0.00 |
| ATOM | 4904 | 2HD | PRO | A | 341 | 53.697 | 25.127 | 11.963 | 1.00 | 0.00 |
| ATOM | 4905 | N   | ASP | A | 342 | 54.960 | 24.725 | 6.684  | 1.00 | 0.00 |
| ATOM | 4906 | CA  | ASP | A | 342 | 55.924 | 25.060 | 5.651  | 1.00 | 0.00 |
| ATOM | 4907 | C   | ASP | A | 342 | 55.443 | 26.303 | 4.912  | 1.00 | 0.00 |
| ATOM | 4908 | O   | ASP | A | 342 | 54.498 | 26.240 | 4.124  | 1.00 | 0.00 |
| ATOM | 4909 | CB  | ASP | A | 342 | 56.119 | 23.893 | 4.680  | 1.00 | 0.00 |
| ATOM | 4910 | CG  | ASP | A | 342 | 57.160 | 24.142 | 3.597  | 1.00 | 0.00 |

PEDF\_P1\_final\_docking\_model.txt

|      |      |     |     |   |     |        |        |        |      |      |
|------|------|-----|-----|---|-----|--------|--------|--------|------|------|
| ATOM | 4911 | OD1 | ASP | A | 342 | 57.657 | 25.241 | 3.520  | 1.00 | 0.00 |
| ATOM | 4912 | OD2 | ASP | A | 342 | 57.563 | 23.199 | 2.960  | 1.00 | 0.00 |
| ATOM | 4913 | H   | ASP | A | 342 | 54.003 | 24.535 | 6.421  | 1.00 | 0.00 |
| ATOM | 4914 | HA  | ASP | A | 342 | 56.887 | 25.292 | 6.106  | 1.00 | 0.00 |
| ATOM | 4915 | 1HB | ASP | A | 342 | 56.332 | 22.946 | 5.176  | 1.00 | 0.00 |
| ATOM | 4916 | 2HB | ASP | A | 342 | 55.127 | 23.852 | 4.228  | 1.00 | 0.00 |
| ATOM | 4917 | N   | PHE | A | 343 | 56.091 | 27.433 | 5.172  | 1.00 | 0.00 |
| ATOM | 4918 | CA  | PHE | A | 343 | 55.718 | 28.685 | 4.526  | 1.00 | 0.00 |
| ATOM | 4919 | C   | PHE | A | 343 | 56.872 | 29.220 | 3.698  | 1.00 | 0.00 |
| ATOM | 4920 | O   | PHE | A | 343 | 57.002 | 30.428 | 3.507  | 1.00 | 0.00 |
| ATOM | 4921 | CB  | PHE | A | 343 | 55.287 | 29.722 | 5.564  | 1.00 | 0.00 |
| ATOM | 4922 | CG  | PHE | A | 343 | 53.951 | 29.435 | 6.190  | 1.00 | 0.00 |
| ATOM | 4923 | CD1 | PHE | A | 343 | 53.845 | 29.187 | 7.550  | 1.00 | 0.00 |
| ATOM | 4924 | CD2 | PHE | A | 343 | 52.799 | 29.411 | 5.419  | 1.00 | 0.00 |
| ATOM | 4925 | CE1 | PHE | A | 343 | 52.617 | 28.922 | 8.127  | 1.00 | 0.00 |
| ATOM | 4926 | CE2 | PHE | A | 343 | 51.570 | 29.147 | 5.993  | 1.00 | 0.00 |
| ATOM | 4927 | CZ  | PHE | A | 343 | 51.480 | 28.902 | 7.348  | 1.00 | 0.00 |
| ATOM | 4928 | H   | PHE | A | 343 | 56.858 | 27.428 | 5.830  | 1.00 | 0.00 |
| ATOM | 4929 | HA  | PHE | A | 343 | 54.886 | 28.515 | 3.841  | 1.00 | 0.00 |
| ATOM | 4930 | 1HB | PHE | A | 343 | 56.010 | 29.762 | 6.378  | 1.00 | 0.00 |
| ATOM | 4931 | 2HB | PHE | A | 343 | 55.208 | 30.705 | 5.101  | 1.00 | 0.00 |
| ATOM | 4932 | HD1 | PHE | A | 343 | 54.745 | 29.203 | 8.166  | 1.00 | 0.00 |
| ATOM | 4933 | HD2 | PHE | A | 343 | 52.870 | 29.604 | 4.348  | 1.00 | 0.00 |
| ATOM | 4934 | HE1 | PHE | A | 343 | 52.549 | 28.729 | 9.197  | 1.00 | 0.00 |
| ATOM | 4935 | HE2 | PHE | A | 343 | 50.672 | 29.132 | 5.376  | 1.00 | 0.00 |
| ATOM | 4936 | HZ  | PHE | A | 343 | 50.512 | 28.693 | 7.801  | 1.00 | 0.00 |
| ATOM | 4937 | N   | SER | A | 344 | 57.706 | 28.312 | 3.204  | 1.00 | 0.00 |
| ATOM | 4938 | CA  | SER | A | 344 | 58.867 | 28.688 | 2.407  | 1.00 | 0.00 |
| ATOM | 4939 | C   | SER | A | 344 | 58.552 | 29.643 | 1.251  | 1.00 | 0.00 |
| ATOM | 4940 | O   | SER | A | 344 | 59.459 | 30.230 | 0.655  | 1.00 | 0.00 |
| ATOM | 4941 | CB  | SER | A | 344 | 59.529 | 27.434 | 1.871  | 1.00 | 0.00 |
| ATOM | 4942 | OG  | SER | A | 344 | 58.698 | 26.740 | 0.980  | 1.00 | 0.00 |
| ATOM | 4943 | H   | SER | A | 344 | 57.530 | 27.334 | 3.386  | 1.00 | 0.00 |
| ATOM | 4944 | HA  | SER | A | 344 | 59.670 | 29.133 | 2.996  | 1.00 | 0.00 |
| ATOM | 4945 | 1HB | SER | A | 344 | 60.445 | 27.717 | 1.353  | 1.00 | 0.00 |
| ATOM | 4946 | 2HB | SER | A | 344 | 59.773 | 26.782 | 2.709  | 1.00 | 0.00 |
| ATOM | 4947 | HG  | SER | A | 344 | 57.890 | 26.483 | 1.431  | 1.00 | 0.00 |
| ATOM | 4948 | N   | LYS | A | 345 | 57.272 | 29.809 | 0.939  | 1.00 | 0.00 |
| ATOM | 4949 | CA  | LYS | A | 345 | 56.879 | 30.727 | -0.124 | 1.00 | 0.00 |
| ATOM | 4950 | C   | LYS | A | 345 | 56.805 | 32.158 | 0.406  | 1.00 | 0.00 |
| ATOM | 4951 | O   | LYS | A | 345 | 56.677 | 33.109 | -0.362 | 1.00 | 0.00 |
| ATOM | 4952 | CB  | LYS | A | 345 | 55.535 | 30.312 | -0.725 | 1.00 | 0.00 |
| ATOM | 4953 | CG  | LYS | A | 345 | 55.599 | 29.080 | -1.618 | 1.00 | 0.00 |
| ATOM | 4954 | CD  | LYS | A | 345 | 54.225 | 28.721 | -2.164 | 1.00 | 0.00 |
| ATOM | 4955 | CE  | LYS | A | 345 | 54.216 | 27.324 | -2.767 | 1.00 | 0.00 |
| ATOM | 4956 | NZ  | LYS | A | 345 | 52.833 | 26.810 | -2.962 | 1.00 | 0.00 |
| ATOM | 4957 | H   | LYS | A | 345 | 56.557 | 29.299 | 1.438  | 1.00 | 0.00 |
| ATOM | 4958 | HA  | LYS | A | 345 | 57.630 | 30.719 | -0.915 | 1.00 | 0.00 |
| ATOM | 4959 | 1HB | LYS | A | 345 | 54.858 | 30.122 | 0.107  | 1.00 | 0.00 |
| ATOM | 4960 | 2HB | LYS | A | 345 | 55.168 | 31.160 | -1.304 | 1.00 | 0.00 |
| ATOM | 4961 | 1HG | LYS | A | 345 | 56.277 | 29.287 | -2.447 | 1.00 | 0.00 |
| ATOM | 4962 | 2HG | LYS | A | 345 | 55.987 | 28.247 | -1.032 | 1.00 | 0.00 |
| ATOM | 4963 | 1HD | LYS | A | 345 | 53.503 | 28.769 | -1.347 | 1.00 | 0.00 |
| ATOM | 4964 | 2HD | LYS | A | 345 | 53.954 | 29.448 | -2.930 | 1.00 | 0.00 |
| ATOM | 4965 | 1HE | LYS | A | 345 | 54.727 | 27.363 | -3.728 | 1.00 | 0.00 |
| ATOM | 4966 | 2HE | LYS | A | 345 | 54.759 | 26.659 | -2.096 | 1.00 | 0.00 |
| ATOM | 4967 | 1HZ | LYS | A | 345 | 52.872 | 25.884 | -3.363 | 1.00 | 0.00 |
| ATOM | 4968 | 2HZ | LYS | A | 345 | 52.359 | 26.772 | -2.071 | 1.00 | 0.00 |
| ATOM | 4969 | 3HZ | LYS | A | 345 | 52.331 | 27.426 | -3.585 | 1.00 | 0.00 |
| ATOM | 4970 | N   | ILE | A | 346 | 56.876 | 32.298 | 1.724  | 1.00 | 0.00 |
| ATOM | 4971 | CA  | ILE | A | 346 | 56.831 | 33.603 | 2.374  | 1.00 | 0.00 |
| ATOM | 4972 | C   | ILE | A | 346 | 58.243 | 34.054 | 2.725  | 1.00 | 0.00 |
| ATOM | 4973 | O   | ILE | A | 346 | 58.617 | 35.211 | 2.524  | 1.00 | 0.00 |

PEDF\_P1\_final\_docking\_model.txt

|      |      |      |     |   |     |        |        |        |      |      |
|------|------|------|-----|---|-----|--------|--------|--------|------|------|
| ATOM | 4974 | CB   | ILE | A | 346 | 56.025 | 33.583 | 3.680  | 1.00 | 0.00 |
| ATOM | 4975 | CG1  | ILE | A | 346 | 54.551 | 33.311 | 3.439  | 1.00 | 0.00 |
| ATOM | 4976 | CG2  | ILE | A | 346 | 56.194 | 34.888 | 4.462  | 1.00 | 0.00 |
| ATOM | 4977 | CD1  | ILE | A | 346 | 53.758 | 33.258 | 4.741  | 1.00 | 0.00 |
| ATOM | 4978 | H    | ILE | A | 346 | 56.964 | 31.468 | 2.293  | 1.00 | 0.00 |
| ATOM | 4979 | HA   | ILE | A | 346 | 56.443 | 34.359 | 1.692  | 1.00 | 0.00 |
| ATOM | 4980 | HB   | ILE | A | 346 | 56.368 | 32.753 | 4.297  | 1.00 | 0.00 |
| ATOM | 4981 | 1HG1 | ILE | A | 346 | 54.175 | 34.108 | 2.798  | 1.00 | 0.00 |
| ATOM | 4982 | 2HG1 | ILE | A | 346 | 54.479 | 32.359 | 2.913  | 1.00 | 0.00 |
| ATOM | 4983 | 1HG2 | ILE | A | 346 | 55.610 | 34.840 | 5.381  | 1.00 | 0.00 |
| ATOM | 4984 | 2HG2 | ILE | A | 346 | 57.245 | 35.031 | 4.708  | 1.00 | 0.00 |
| ATOM | 4985 | 3HG2 | ILE | A | 346 | 55.847 | 35.724 | 3.855  | 1.00 | 0.00 |
| ATOM | 4986 | 1HD1 | ILE | A | 346 | 52.709 | 33.061 | 4.521  | 1.00 | 0.00 |
| ATOM | 4987 | 2HD1 | ILE | A | 346 | 54.151 | 32.463 | 5.375  | 1.00 | 0.00 |
| ATOM | 4988 | 3HD1 | ILE | A | 346 | 53.845 | 34.211 | 5.260  | 1.00 | 0.00 |
| ATOM | 4989 | N    | THR | A | 347 | 59.021 | 33.116 | 3.254  | 1.00 | 0.00 |
| ATOM | 4990 | CA   | THR | A | 347 | 60.384 | 33.385 | 3.678  | 1.00 | 0.00 |
| ATOM | 4991 | C    | THR | A | 347 | 61.179 | 32.079 | 3.796  | 1.00 | 0.00 |
| ATOM | 4992 | O    | THR | A | 347 | 60.604 | 30.992 | 3.915  | 1.00 | 0.00 |
| ATOM | 4993 | CB   | THR | A | 347 | 60.419 | 34.130 | 5.025  | 1.00 | 0.00 |
| ATOM | 4994 | OG1  | THR | A | 347 | 61.771 | 34.488 | 5.341  | 1.00 | 0.00 |
| ATOM | 4995 | CG2  | THR | A | 347 | 59.858 | 33.254 | 6.134  | 1.00 | 0.00 |
| ATOM | 4996 | H    | THR | A | 347 | 58.647 | 32.184 | 3.363  | 1.00 | 0.00 |
| ATOM | 4997 | HA   | THR | A | 347 | 60.890 | 33.994 | 2.928  | 1.00 | 0.00 |
| ATOM | 4998 | HB   | THR | A | 347 | 59.822 | 35.038 | 4.943  | 1.00 | 0.00 |
| ATOM | 4999 | HG1  | THR | A | 347 | 62.120 | 35.058 | 4.651  | 1.00 | 0.00 |
| ATOM | 5000 | 1HG2 | THR | A | 347 | 59.890 | 33.798 | 7.078  | 1.00 | 0.00 |
| ATOM | 5001 | 2HG2 | THR | A | 347 | 58.826 | 32.990 | 5.902  | 1.00 | 0.00 |
| ATOM | 5002 | 3HG2 | THR | A | 347 | 60.455 | 32.347 | 6.217  | 1.00 | 0.00 |
| ATOM | 5003 | N    | GLY | A | 348 | 62.502 | 32.188 | 3.755  | 1.00 | 0.00 |
| ATOM | 5004 | CA   | GLY | A | 348 | 63.332 | 31.007 | 3.869  | 1.00 | 0.00 |
| ATOM | 5005 | C    | GLY | A | 348 | 63.387 | 30.528 | 5.306  | 1.00 | 0.00 |
| ATOM | 5006 | O    | GLY | A | 348 | 63.482 | 29.331 | 5.575  | 1.00 | 0.00 |
| ATOM | 5007 | H    | GLY | A | 348 | 62.943 | 33.090 | 3.645  | 1.00 | 0.00 |
| ATOM | 5008 | 1HA  | GLY | A | 348 | 62.916 | 30.218 | 3.242  | 1.00 | 0.00 |
| ATOM | 5009 | 2HA  | GLY | A | 348 | 64.340 | 31.246 | 3.530  | 1.00 | 0.00 |
| ATOM | 5010 | N    | LYS | A | 349 | 63.330 | 31.469 | 6.238  | 1.00 | 0.00 |
| ATOM | 5011 | CA   | LYS | A | 349 | 63.378 | 31.131 | 7.652  | 1.00 | 0.00 |
| ATOM | 5012 | C    | LYS | A | 349 | 62.116 | 30.379 | 8.074  | 1.00 | 0.00 |
| ATOM | 5013 | O    | LYS | A | 349 | 61.031 | 30.619 | 7.540  | 1.00 | 0.00 |
| ATOM | 5014 | CB   | LYS | A | 349 | 63.553 | 32.393 | 8.498  | 1.00 | 0.00 |
| ATOM | 5015 | CG   | LYS | A | 349 | 64.900 | 33.083 | 8.328  | 1.00 | 0.00 |
| ATOM | 5016 | CD   | LYS | A | 349 | 65.012 | 34.307 | 9.225  | 1.00 | 0.00 |
| ATOM | 5017 | CE   | LYS | A | 349 | 66.348 | 35.010 | 9.040  | 1.00 | 0.00 |
| ATOM | 5018 | NZ   | LYS | A | 349 | 66.478 | 36.201 | 9.922  | 1.00 | 0.00 |
| ATOM | 5019 | H    | LYS | A | 349 | 63.252 | 32.439 | 5.966  | 1.00 | 0.00 |
| ATOM | 5020 | HA   | LYS | A | 349 | 64.219 | 30.464 | 7.844  | 1.00 | 0.00 |
| ATOM | 5021 | 1HB  | LYS | A | 349 | 62.755 | 33.080 | 8.215  | 1.00 | 0.00 |
| ATOM | 5022 | 2HB  | LYS | A | 349 | 63.425 | 32.100 | 9.541  | 1.00 | 0.00 |
| ATOM | 5023 | 1HG  | LYS | A | 349 | 65.687 | 32.373 | 8.581  | 1.00 | 0.00 |
| ATOM | 5024 | 2HG  | LYS | A | 349 | 65.005 | 33.385 | 7.287  | 1.00 | 0.00 |
| ATOM | 5025 | 1HD  | LYS | A | 349 | 64.201 | 34.994 | 8.978  | 1.00 | 0.00 |
| ATOM | 5026 | 2HD  | LYS | A | 349 | 64.912 | 33.987 | 10.263 | 1.00 | 0.00 |
| ATOM | 5027 | 1HE  | LYS | A | 349 | 67.142 | 34.300 | 9.269  | 1.00 | 0.00 |
| ATOM | 5028 | 2HE  | LYS | A | 349 | 66.429 | 35.319 | 7.998  | 1.00 | 0.00 |
| ATOM | 5029 | 1HZ  | LYS | A | 349 | 67.376 | 36.638 | 9.768  | 1.00 | 0.00 |
| ATOM | 5030 | 2HZ  | LYS | A | 349 | 65.742 | 36.860 | 9.709  | 1.00 | 0.00 |
| ATOM | 5031 | 3HZ  | LYS | A | 349 | 66.404 | 35.915 | 10.887 | 1.00 | 0.00 |
| ATOM | 5032 | N    | PRO | A | 350 | 62.243 | 29.439 | 9.025  | 1.00 | 0.00 |
| ATOM | 5033 | CA   | PRO | A | 350 | 61.053 | 28.696 | 9.461  | 1.00 | 0.00 |
| ATOM | 5034 | C    | PRO | A | 350 | 60.187 | 29.563 | 10.365 | 1.00 | 0.00 |
| ATOM | 5035 | O    | PRO | A | 350 | 60.634 | 30.022 | 11.421 | 1.00 | 0.00 |
| ATOM | 5036 | CB   | PRO | A | 350 | 61.611 | 27.474 | 10.196 | 1.00 | 0.00 |



PEDF\_P1\_final\_docking\_model.txt

|      |      |      |     |   |     |        |        |        |      |      |
|------|------|------|-----|---|-----|--------|--------|--------|------|------|
| ATOM | 5037 | CG   | PRO | A | 350 | 62.936 | 27.923 | 10.712 | 1.00 | 0.00 |
| ATOM | 5038 | CD   | PRO | A | 350 | 63.456 | 28.892 | 9.684  | 1.00 | 0.00 |
| ATOM | 5039 | HA   | PRO | A | 350 | 60.403 | 28.404 | 8.623  | 1.00 | 0.00 |
| ATOM | 5040 | 1HB  | PRO | A | 350 | 60.950 | 27.160 | 11.018 | 1.00 | 0.00 |
| ATOM | 5041 | 2HB  | PRO | A | 350 | 61.718 | 26.611 | 9.522  | 1.00 | 0.00 |
| ATOM | 5042 | 1HG  | PRO | A | 350 | 62.837 | 28.405 | 11.696 | 1.00 | 0.00 |
| ATOM | 5043 | 2HG  | PRO | A | 350 | 63.623 | 27.073 | 10.837 | 1.00 | 0.00 |
| ATOM | 5044 | 1HD  | PRO | A | 350 | 64.030 | 29.713 | 10.139 | 1.00 | 0.00 |
| ATOM | 5045 | 2HD  | PRO | A | 350 | 64.116 | 28.406 | 8.950  | 1.00 | 0.00 |
| ATOM | 5046 | N    | ILE | A | 351 | 58.955 | 29.801 | 9.940  | 1.00 | 0.00 |
| ATOM | 5047 | CA   | ILE | A | 351 | 58.030 | 30.595 | 10.727 | 1.00 | 0.00 |
| ATOM | 5048 | C    | ILE | A | 351 | 56.803 | 29.730 | 10.937 | 1.00 | 0.00 |
| ATOM | 5049 | O    | ILE | A | 351 | 56.507 | 28.857 | 10.121 | 1.00 | 0.00 |
| ATOM | 5050 | CB   | ILE | A | 351 | 57.643 | 31.918 | 10.042 | 1.00 | 0.00 |
| ATOM | 5051 | CG1  | ILE | A | 351 | 57.114 | 31.654 | 8.630  | 1.00 | 0.00 |
| ATOM | 5052 | CG2  | ILE | A | 351 | 58.833 | 32.864 | 10.000 | 1.00 | 0.00 |
| ATOM | 5053 | CD1  | ILE | A | 351 | 56.527 | 32.875 | 7.959  | 1.00 | 0.00 |
| ATOM | 5054 | H    | ILE | A | 351 | 58.650 | 29.425 | 9.053  | 1.00 | 0.00 |
| ATOM | 5055 | HA   | ILE | A | 351 | 58.453 | 30.819 | 11.705 | 1.00 | 0.00 |
| ATOM | 5056 | HB   | ILE | A | 351 | 56.829 | 32.382 | 10.600 | 1.00 | 0.00 |
| ATOM | 5057 | 1HG1 | ILE | A | 351 | 57.947 | 31.279 | 8.037  | 1.00 | 0.00 |
| ATOM | 5058 | 2HG1 | ILE | A | 351 | 56.349 | 30.881 | 8.710  | 1.00 | 0.00 |
| ATOM | 5059 | 1HG2 | ILE | A | 351 | 58.542 | 33.794 | 9.513  | 1.00 | 0.00 |
| ATOM | 5060 | 2HG2 | ILE | A | 351 | 59.165 | 33.076 | 11.016 | 1.00 | 0.00 |
| ATOM | 5061 | 3HG2 | ILE | A | 351 | 59.646 | 32.401 | 9.442  | 1.00 | 0.00 |
| ATOM | 5062 | 1HD1 | ILE | A | 351 | 56.174 | 32.609 | 6.963  | 1.00 | 0.00 |
| ATOM | 5063 | 2HD1 | ILE | A | 351 | 55.692 | 33.251 | 8.551  | 1.00 | 0.00 |
| ATOM | 5064 | 3HD1 | ILE | A | 351 | 57.290 | 33.648 | 7.877  | 1.00 | 0.00 |
| ATOM | 5065 | N    | LYS | A | 352 | 56.096 | 29.948 | 12.035 | 1.00 | 0.00 |
| ATOM | 5066 | CA   | LYS | A | 352 | 54.907 | 29.159 | 12.310 | 1.00 | 0.00 |
| ATOM | 5067 | C    | LYS | A | 352 | 53.788 | 30.044 | 12.819 | 1.00 | 0.00 |
| ATOM | 5068 | O    | LYS | A | 352 | 54.029 | 31.130 | 13.333 | 1.00 | 0.00 |
| ATOM | 5069 | CB   | LYS | A | 352 | 55.212 | 28.056 | 13.325 | 1.00 | 0.00 |
| ATOM | 5070 | CG   | LYS | A | 352 | 55.680 | 28.562 | 14.682 | 1.00 | 0.00 |
| ATOM | 5071 | CD   | LYS | A | 352 | 55.990 | 27.409 | 15.626 | 1.00 | 0.00 |
| ATOM | 5072 | CE   | LYS | A | 352 | 56.461 | 27.914 | 16.982 | 1.00 | 0.00 |
| ATOM | 5073 | NZ   | LYS | A | 352 | 56.703 | 26.799 | 17.937 | 1.00 | 0.00 |
| ATOM | 5074 | H    | LYS | A | 352 | 56.375 | 30.663 | 12.692 | 1.00 | 0.00 |
| ATOM | 5075 | HA   | LYS | A | 352 | 54.552 | 28.694 | 11.390 | 1.00 | 0.00 |
| ATOM | 5076 | 1HB  | LYS | A | 352 | 54.297 | 27.476 | 13.450 | 1.00 | 0.00 |
| ATOM | 5077 | 2HB  | LYS | A | 352 | 55.985 | 27.423 | 12.887 | 1.00 | 0.00 |
| ATOM | 5078 | 1HG  | LYS | A | 352 | 56.578 | 29.164 | 14.536 | 1.00 | 0.00 |
| ATOM | 5079 | 2HG  | LYS | A | 352 | 54.894 | 29.181 | 15.112 | 1.00 | 0.00 |
| ATOM | 5080 | 1HD  | LYS | A | 352 | 55.086 | 26.812 | 15.753 | 1.00 | 0.00 |
| ATOM | 5081 | 2HD  | LYS | A | 352 | 56.771 | 26.794 | 15.178 | 1.00 | 0.00 |
| ATOM | 5082 | 1HE  | LYS | A | 352 | 57.383 | 28.474 | 16.837 | 1.00 | 0.00 |
| ATOM | 5083 | 2HE  | LYS | A | 352 | 55.694 | 28.576 | 17.384 | 1.00 | 0.00 |
| ATOM | 5084 | 1HZ  | LYS | A | 352 | 57.012 | 27.175 | 18.822 | 1.00 | 0.00 |
| ATOM | 5085 | 2HZ  | LYS | A | 352 | 55.847 | 26.279 | 18.073 | 1.00 | 0.00 |
| ATOM | 5086 | 3HZ  | LYS | A | 352 | 57.414 | 26.185 | 17.565 | 1.00 | 0.00 |
| ATOM | 5087 | N    | LEU | A | 353 | 52.557 | 29.579 | 12.665 | 1.00 | 0.00 |
| ATOM | 5088 | CA   | LEU | A | 353 | 51.419 | 30.341 | 13.141 | 1.00 | 0.00 |
| ATOM | 5089 | C    | LEU | A | 353 | 51.523 | 30.365 | 14.657 | 1.00 | 0.00 |
| ATOM | 5090 | O    | LEU | A | 353 | 51.483 | 29.324 | 15.313 | 1.00 | 0.00 |
| ATOM | 5091 | CB   | LEU | A | 353 | 50.094 | 29.724 | 12.675 | 1.00 | 0.00 |
| ATOM | 5092 | CG   | LEU | A | 353 | 48.836 | 30.511 | 13.063 | 1.00 | 0.00 |
| ATOM | 5093 | CD1  | LEU | A | 353 | 48.932 | 31.939 | 12.542 | 1.00 | 0.00 |
| ATOM | 5094 | CD2  | LEU | A | 353 | 47.606 | 29.814 | 12.500 | 1.00 | 0.00 |
| ATOM | 5095 | H    | LEU | A | 353 | 52.399 | 28.689 | 12.214 | 1.00 | 0.00 |
| ATOM | 5096 | HA   | LEU | A | 353 | 51.475 | 31.359 | 12.757 | 1.00 | 0.00 |
| ATOM | 5097 | 1HB  | LEU | A | 353 | 50.247 | 29.770 | 11.598 | 1.00 | 0.00 |
| ATOM | 5098 | 2HB  | LEU | A | 353 | 50.003 | 28.683 | 12.984 | 1.00 | 0.00 |
| ATOM | 5099 | HG   | LEU | A | 353 | 48.763 | 30.490 | 14.150 | 1.00 | 0.00 |

PEDF\_P1\_final\_docking\_model.txt

|      |      |      |     |   |     |        |        |        |      |      |
|------|------|------|-----|---|-----|--------|--------|--------|------|------|
| ATOM | 5100 | 1HD1 | LEU | A | 353 | 48.034 | 32.490 | 12.822 | 1.00 | 0.00 |
| ATOM | 5101 | 2HD1 | LEU | A | 353 | 49.805 | 32.426 | 12.976 | 1.00 | 0.00 |
| ATOM | 5102 | 3HD1 | LEU | A | 353 | 49.024 | 31.925 | 11.457 | 1.00 | 0.00 |
| ATOM | 5103 | 1HD2 | LEU | A | 353 | 46.712 | 30.373 | 12.777 | 1.00 | 0.00 |
| ATOM | 5104 | 2HD2 | LEU | A | 353 | 47.681 | 29.763 | 11.413 | 1.00 | 0.00 |
| ATOM | 5105 | 3HD2 | LEU | A | 353 | 47.542 | 28.804 | 12.907 | 1.00 | 0.00 |
| ATOM | 5106 | N    | THR | A | 354 | 51.665 | 31.559 | 15.216 | 1.00 | 0.00 |
| ATOM | 5107 | CA   | THR | A | 354 | 51.791 | 31.683 | 16.656 | 1.00 | 0.00 |
| ATOM | 5108 | C    | THR | A | 354 | 50.492 | 32.083 | 17.360 | 1.00 | 0.00 |
| ATOM | 5109 | O    | THR | A | 354 | 50.149 | 31.503 | 18.387 | 1.00 | 0.00 |
| ATOM | 5110 | CB   | THR | A | 354 | 52.881 | 32.709 | 17.016 | 1.00 | 0.00 |
| ATOM | 5111 | OG1  | THR | A | 354 | 54.143 | 32.274 | 16.492 | 1.00 | 0.00 |
| ATOM | 5112 | CG2  | THR | A | 354 | 52.990 | 32.864 | 18.526 | 1.00 | 0.00 |
| ATOM | 5113 | H    | THR | A | 354 | 51.687 | 32.393 | 14.647 | 1.00 | 0.00 |
| ATOM | 5114 | HA   | THR | A | 354 | 52.051 | 30.717 | 17.088 | 1.00 | 0.00 |
| ATOM | 5115 | HB   | THR | A | 354 | 52.625 | 33.670 | 16.571 | 1.00 | 0.00 |
| ATOM | 5116 | HG1  | THR | A | 354 | 54.518 | 31.609 | 17.074 | 1.00 | 0.00 |
| ATOM | 5117 | 1HG2 | THR | A | 354 | 53.766 | 33.593 | 18.760 | 1.00 | 0.00 |
| ATOM | 5118 | 2HG2 | THR | A | 354 | 52.036 | 33.205 | 18.926 | 1.00 | 0.00 |
| ATOM | 5119 | 3HG2 | THR | A | 354 | 53.248 | 31.904 | 18.971 | 1.00 | 0.00 |
| ATOM | 5120 | N    | GLN | A | 355 | 49.775 | 33.066 | 16.821 | 1.00 | 0.00 |
| ATOM | 5121 | CA   | GLN | A | 355 | 48.499 | 33.489 | 17.409 | 1.00 | 0.00 |
| ATOM | 5122 | C    | GLN | A | 355 | 47.556 | 34.163 | 16.424 | 1.00 | 0.00 |
| ATOM | 5123 | O    | GLN | A | 355 | 47.987 | 34.730 | 15.418 | 1.00 | 0.00 |
| ATOM | 5124 | CB   | GLN | A | 355 | 48.756 | 34.443 | 18.579 | 1.00 | 0.00 |
| ATOM | 5125 | CG   | GLN | A | 355 | 47.497 | 34.917 | 19.283 | 1.00 | 0.00 |
| ATOM | 5126 | CD   | GLN | A | 355 | 47.783 | 35.485 | 20.661 | 1.00 | 0.00 |
| ATOM | 5127 | OE1  | GLN | A | 355 | 48.076 | 34.745 | 21.604 | 1.00 | 0.00 |
| ATOM | 5128 | NE2  | GLN | A | 355 | 47.696 | 36.804 | 20.786 | 1.00 | 0.00 |
| ATOM | 5129 | H    | GLN | A | 355 | 50.113 | 33.532 | 15.991 | 1.00 | 0.00 |
| ATOM | 5130 | HA   | GLN | A | 355 | 47.953 | 32.615 | 17.764 | 1.00 | 0.00 |
| ATOM | 5131 | 1HB  | GLN | A | 355 | 49.396 | 33.912 | 19.283 | 1.00 | 0.00 |
| ATOM | 5132 | 2HB  | GLN | A | 355 | 49.295 | 35.299 | 18.173 | 1.00 | 0.00 |
| ATOM | 5133 | 1HG  | GLN | A | 355 | 46.758 | 35.559 | 18.804 | 1.00 | 0.00 |
| ATOM | 5134 | 2HG  | GLN | A | 355 | 47.082 | 33.915 | 19.403 | 1.00 | 0.00 |
| ATOM | 5135 | 1HE2 | GLN | A | 355 | 47.874 | 37.236 | 21.671 | 1.00 | 0.00 |
| ATOM | 5136 | 2HE2 | GLN | A | 355 | 47.453 | 37.367 | 19.995 | 1.00 | 0.00 |
| ATOM | 5137 | N    | VAL | A | 356 | 46.264 | 34.083 | 16.732 | 1.00 | 0.00 |
| ATOM | 5138 | CA   | VAL | A | 356 | 45.210 | 34.657 | 15.910 | 1.00 | 0.00 |
| ATOM | 5139 | C    | VAL | A | 356 | 44.285 | 35.476 | 16.804 | 1.00 | 0.00 |
| ATOM | 5140 | O    | VAL | A | 356 | 43.612 | 34.924 | 17.667 | 1.00 | 0.00 |
| ATOM | 5141 | CB   | VAL | A | 356 | 44.399 | 33.578 | 15.169 | 1.00 | 0.00 |
| ATOM | 5142 | CG1  | VAL | A | 356 | 43.296 | 34.218 | 14.338 | 1.00 | 0.00 |
| ATOM | 5143 | CG2  | VAL | A | 356 | 45.309 | 32.739 | 14.286 | 1.00 | 0.00 |
| ATOM | 5144 | H    | VAL | A | 356 | 46.016 | 33.597 | 17.582 | 1.00 | 0.00 |
| ATOM | 5145 | HA   | VAL | A | 356 | 45.616 | 35.348 | 15.170 | 1.00 | 0.00 |
| ATOM | 5146 | HB   | VAL | A | 356 | 43.957 | 32.902 | 15.901 | 1.00 | 0.00 |
| ATOM | 5147 | 1HG1 | VAL | A | 356 | 42.732 | 33.441 | 13.821 | 1.00 | 0.00 |
| ATOM | 5148 | 2HG1 | VAL | A | 356 | 42.626 | 34.777 | 14.992 | 1.00 | 0.00 |
| ATOM | 5149 | 3HG1 | VAL | A | 356 | 43.737 | 34.893 | 13.606 | 1.00 | 0.00 |
| ATOM | 5150 | 1HG2 | VAL | A | 356 | 44.720 | 31.981 | 13.770 | 1.00 | 0.00 |
| ATOM | 5151 | 2HG2 | VAL | A | 356 | 45.797 | 33.382 | 13.552 | 1.00 | 0.00 |
| ATOM | 5152 | 3HG2 | VAL | A | 356 | 46.066 | 32.252 | 14.901 | 1.00 | 0.00 |
| ATOM | 5153 | N    | GLU | A | 357 | 44.249 | 36.790 | 16.598 | 1.00 | 0.00 |
| ATOM | 5154 | CA   | GLU | A | 357 | 43.406 | 37.654 | 17.419 | 1.00 | 0.00 |
| ATOM | 5155 | C    | GLU | A | 357 | 42.182 | 38.188 | 16.677 | 1.00 | 0.00 |
| ATOM | 5156 | O    | GLU | A | 357 | 42.236 | 38.490 | 15.483 | 1.00 | 0.00 |
| ATOM | 5157 | CB   | GLU | A | 357 | 44.231 | 38.825 | 17.957 | 1.00 | 0.00 |
| ATOM | 5158 | CG   | GLU | A | 357 | 45.466 | 38.414 | 18.746 | 1.00 | 0.00 |
| ATOM | 5159 | CD   | GLU | A | 357 | 46.359 | 39.593 | 19.017 | 1.00 | 0.00 |
| ATOM | 5160 | OE1  | GLU | A | 357 | 46.051 | 40.665 | 18.555 | 1.00 | 0.00 |
| ATOM | 5161 | OE2  | GLU | A | 357 | 47.286 | 39.448 | 19.779 | 1.00 | 0.00 |
| ATOM | 5162 | H    | GLU | A | 357 | 44.810 | 37.202 | 15.866 | 1.00 | 0.00 |

PEDF\_P1\_final\_docking\_model.txt

|      |      |      |     |   |     |        |        |        |      |      |
|------|------|------|-----|---|-----|--------|--------|--------|------|------|
| ATOM | 5163 | HA   | GLU | A | 357 | 43.004 | 37.088 | 18.260 | 1.00 | 0.00 |
| ATOM | 5164 | 1HB  | GLU | A | 357 | 44.533 | 39.423 | 17.097 | 1.00 | 0.00 |
| ATOM | 5165 | 2HB  | GLU | A | 357 | 43.572 | 39.413 | 18.596 | 1.00 | 0.00 |
| ATOM | 5166 | 1HG  | GLU | A | 357 | 45.234 | 37.912 | 19.685 | 1.00 | 0.00 |
| ATOM | 5167 | 2HG  | GLU | A | 357 | 45.976 | 37.719 | 18.080 | 1.00 | 0.00 |
| ATOM | 5168 | N    | HIS | A | 358 | 41.080 | 38.317 | 17.404 | 1.00 | 0.00 |
| ATOM | 5169 | CA   | HIS | A | 358 | 39.835 | 38.790 | 16.818 | 1.00 | 0.00 |
| ATOM | 5170 | C    | HIS | A | 358 | 39.229 | 39.946 | 17.613 | 1.00 | 0.00 |
| ATOM | 5171 | O    | HIS | A | 358 | 39.120 | 39.898 | 18.836 | 1.00 | 0.00 |
| ATOM | 5172 | CB   | HIS | A | 358 | 38.825 | 37.642 | 16.716 | 1.00 | 0.00 |
| ATOM | 5173 | CG   | HIS | A | 358 | 37.514 | 38.046 | 16.117 | 1.00 | 0.00 |
| ATOM | 5174 | ND1  | HIS | A | 358 | 37.410 | 38.599 | 14.858 | 1.00 | 0.00 |
| ATOM | 5175 | CD2  | HIS | A | 358 | 36.253 | 37.979 | 16.604 | 1.00 | 0.00 |
| ATOM | 5176 | CE1  | HIS | A | 358 | 36.140 | 38.853 | 14.596 | 1.00 | 0.00 |
| ATOM | 5177 | NE2  | HIS | A | 358 | 35.418 | 38.487 | 15.639 | 1.00 | 0.00 |
| ATOM | 5178 | H    | HIS | A | 358 | 41.104 | 38.082 | 18.386 | 1.00 | 0.00 |
| ATOM | 5179 | HA   | HIS | A | 358 | 40.026 | 39.182 | 15.819 | 1.00 | 0.00 |
| ATOM | 5180 | 1HB  | HIS | A | 358 | 39.223 | 36.846 | 16.085 | 1.00 | 0.00 |
| ATOM | 5181 | 2HB  | HIS | A | 358 | 38.607 | 37.245 | 17.707 | 1.00 | 0.00 |
| ATOM | 5182 | HD1  | HIS | A | 358 | 38.155 | 38.716 | 14.200 | 1.00 | 0.00 |
| ATOM | 5183 | HD2  | HIS | A | 358 | 35.842 | 37.621 | 17.548 | 1.00 | 0.00 |
| ATOM | 5184 | HE1  | HIS | A | 358 | 35.847 | 39.294 | 13.643 | 1.00 | 0.00 |
| ATOM | 5185 | N    | ARG | A | 359 | 38.849 | 40.994 | 16.900 | 1.00 | 0.00 |
| ATOM | 5186 | CA   | ARG | A | 359 | 38.234 | 42.157 | 17.517 | 1.00 | 0.00 |
| ATOM | 5187 | C    | ARG | A | 359 | 36.950 | 42.433 | 16.745 | 1.00 | 0.00 |
| ATOM | 5188 | O    | ARG | A | 359 | 36.982 | 42.674 | 15.535 | 1.00 | 0.00 |
| ATOM | 5189 | CB   | ARG | A | 359 | 39.154 | 43.367 | 17.582 | 1.00 | 0.00 |
| ATOM | 5190 | CG   | ARG | A | 359 | 40.402 | 43.177 | 18.430 | 1.00 | 0.00 |
| ATOM | 5191 | CD   | ARG | A | 359 | 41.527 | 44.079 | 18.074 | 1.00 | 0.00 |
| ATOM | 5192 | NE   | ARG | A | 359 | 42.692 | 43.959 | 18.937 | 1.00 | 0.00 |
| ATOM | 5193 | CZ   | ARG | A | 359 | 43.670 | 43.046 | 18.778 | 1.00 | 0.00 |
| ATOM | 5194 | NH1  | ARG | A | 359 | 43.612 | 42.151 | 17.818 | 1.00 | 0.00 |
| ATOM | 5195 | NH2  | ARG | A | 359 | 44.681 | 43.060 | 19.630 | 1.00 | 0.00 |
| ATOM | 5196 | H    | ARG | A | 359 | 38.991 | 40.985 | 15.900 | 1.00 | 0.00 |
| ATOM | 5197 | HA   | ARG | A | 359 | 37.991 | 41.938 | 18.557 | 1.00 | 0.00 |
| ATOM | 5198 | 1HB  | ARG | A | 359 | 39.447 | 43.599 | 16.559 | 1.00 | 0.00 |
| ATOM | 5199 | 2HB  | ARG | A | 359 | 38.568 | 44.191 | 17.987 | 1.00 | 0.00 |
| ATOM | 5200 | 1HG  | ARG | A | 359 | 40.143 | 43.358 | 19.473 | 1.00 | 0.00 |
| ATOM | 5201 | 2HG  | ARG | A | 359 | 40.745 | 42.148 | 18.314 | 1.00 | 0.00 |
| ATOM | 5202 | 1HD  | ARG | A | 359 | 41.851 | 43.857 | 17.057 | 1.00 | 0.00 |
| ATOM | 5203 | 2HD  | ARG | A | 359 | 41.185 | 45.111 | 18.130 | 1.00 | 0.00 |
| ATOM | 5204 | HE   | ARG | A | 359 | 42.951 | 44.502 | 19.749 | 1.00 | 0.00 |
| ATOM | 5205 | 1HH1 | ARG | A | 359 | 42.824 | 42.142 | 17.186 | 1.00 | 0.00 |
| ATOM | 5206 | 2HH1 | ARG | A | 359 | 44.356 | 41.475 | 17.716 | 1.00 | 0.00 |
| ATOM | 5207 | 1HH2 | ARG | A | 359 | 44.701 | 43.745 | 20.374 | 1.00 | 0.00 |
| ATOM | 5208 | 2HH2 | ARG | A | 359 | 45.427 | 42.388 | 19.535 | 1.00 | 0.00 |
| ATOM | 5209 | N    | ALA | A | 360 | 35.820 | 42.378 | 17.436 | 1.00 | 0.00 |
| ATOM | 5210 | CA   | ALA | A | 360 | 34.552 | 42.618 | 16.782 | 1.00 | 0.00 |
| ATOM | 5211 | C    | ALA | A | 360 | 33.689 | 43.574 | 17.584 | 1.00 | 0.00 |
| ATOM | 5212 | O    | ALA | A | 360 | 33.793 | 43.648 | 18.804 | 1.00 | 0.00 |
| ATOM | 5213 | CB   | ALA | A | 360 | 33.793 | 41.304 | 16.590 | 1.00 | 0.00 |
| ATOM | 5214 | H    | ALA | A | 360 | 35.832 | 42.168 | 18.424 | 1.00 | 0.00 |
| ATOM | 5215 | HA   | ALA | A | 360 | 34.740 | 43.087 | 15.816 | 1.00 | 0.00 |
| ATOM | 5216 | 1HB  | ALA | A | 360 | 32.842 | 41.503 | 16.097 | 1.00 | 0.00 |
| ATOM | 5217 | 2HB  | ALA | A | 360 | 34.386 | 40.627 | 15.974 | 1.00 | 0.00 |
| ATOM | 5218 | 3HB  | ALA | A | 360 | 33.609 | 40.845 | 17.560 | 1.00 | 0.00 |
| ATOM | 5219 | N    | GLY | A | 361 | 32.843 | 44.316 | 16.882 | 1.00 | 0.00 |
| ATOM | 5220 | CA   | GLY | A | 361 | 31.962 | 45.257 | 17.541 | 1.00 | 0.00 |
| ATOM | 5221 | C    | GLY | A | 361 | 30.632 | 45.208 | 16.838 | 1.00 | 0.00 |
| ATOM | 5222 | O    | GLY | A | 361 | 30.552 | 45.503 | 15.644 | 1.00 | 0.00 |
| ATOM | 5223 | H    | GLY | A | 361 | 32.807 | 44.230 | 15.876 | 1.00 | 0.00 |
| ATOM | 5224 | 1HA  | GLY | A | 361 | 31.856 | 44.973 | 18.588 | 1.00 | 0.00 |
| ATOM | 5225 | 2HA  | GLY | A | 361 | 32.395 | 46.254 | 17.479 | 1.00 | 0.00 |

PEDF\_P1\_final\_docking\_model.txt

|      |      |     |     |   |     |        |        |        |      |      |
|------|------|-----|-----|---|-----|--------|--------|--------|------|------|
| ATOM | 5226 | N   | PHE | A | 362 | 29.586 | 44.835 | 17.566 | 1.00 | 0.00 |
| ATOM | 5227 | CA  | PHE | A | 362 | 28.258 | 44.730 | 16.970 | 1.00 | 0.00 |
| ATOM | 5228 | C   | PHE | A | 362 | 27.217 | 45.552 | 17.727 | 1.00 | 0.00 |
| ATOM | 5229 | O   | PHE | A | 362 | 27.222 | 45.588 | 18.962 | 1.00 | 0.00 |
| ATOM | 5230 | CB  | PHE | A | 362 | 27.822 | 43.265 | 16.912 | 1.00 | 0.00 |
| ATOM | 5231 | CG  | PHE | A | 362 | 26.521 | 43.047 | 16.193 | 1.00 | 0.00 |
| ATOM | 5232 | CD1 | PHE | A | 362 | 26.472 | 43.039 | 14.807 | 1.00 | 0.00 |
| ATOM | 5233 | CD2 | PHE | A | 362 | 25.345 | 42.851 | 16.900 | 1.00 | 0.00 |
| ATOM | 5234 | CE1 | PHE | A | 362 | 25.275 | 42.839 | 14.144 | 1.00 | 0.00 |
| ATOM | 5235 | CE2 | PHE | A | 362 | 24.148 | 42.650 | 16.241 | 1.00 | 0.00 |
| ATOM | 5236 | CZ  | PHE | A | 362 | 24.114 | 42.645 | 14.861 | 1.00 | 0.00 |
| ATOM | 5237 | H   | PHE | A | 362 | 29.704 | 44.620 | 18.546 | 1.00 | 0.00 |
| ATOM | 5238 | HA  | PHE | A | 362 | 28.275 | 45.132 | 15.956 | 1.00 | 0.00 |
| ATOM | 5239 | 1HB | PHE | A | 362 | 28.571 | 42.671 | 16.389 | 1.00 | 0.00 |
| ATOM | 5240 | 2HB | PHE | A | 362 | 27.690 | 42.874 | 17.920 | 1.00 | 0.00 |
| ATOM | 5241 | HD1 | PHE | A | 362 | 27.390 | 43.192 | 14.240 | 1.00 | 0.00 |
| ATOM | 5242 | HD2 | PHE | A | 362 | 25.372 | 42.856 | 17.991 | 1.00 | 0.00 |
| ATOM | 5243 | HE1 | PHE | A | 362 | 25.250 | 42.836 | 13.055 | 1.00 | 0.00 |
| ATOM | 5244 | HE2 | PHE | A | 362 | 23.231 | 42.497 | 16.809 | 1.00 | 0.00 |
| ATOM | 5245 | HZ  | PHE | A | 362 | 23.170 | 42.488 | 14.339 | 1.00 | 0.00 |
| ATOM | 5246 | N   | GLU | A | 363 | 26.325 | 46.209 | 16.985 | 1.00 | 0.00 |
| ATOM | 5247 | CA  | GLU | A | 363 | 25.291 | 47.040 | 17.602 | 1.00 | 0.00 |
| ATOM | 5248 | C   | GLU | A | 363 | 24.043 | 47.304 | 16.758 | 1.00 | 0.00 |
| ATOM | 5249 | O   | GLU | A | 363 | 24.113 | 47.373 | 15.526 | 1.00 | 0.00 |
| ATOM | 5250 | CB  | GLU | A | 363 | 25.906 | 48.381 | 18.008 | 1.00 | 0.00 |
| ATOM | 5251 | CG  | GLU | A | 363 | 24.943 | 49.328 | 18.710 | 1.00 | 0.00 |
| ATOM | 5252 | CD  | GLU | A | 363 | 25.623 | 50.612 | 19.096 | 1.00 | 0.00 |
| ATOM | 5253 | OE1 | GLU | A | 363 | 26.774 | 50.773 | 18.771 | 1.00 | 0.00 |
| ATOM | 5254 | OE2 | GLU | A | 363 | 24.960 | 51.478 | 19.617 | 1.00 | 0.00 |
| ATOM | 5255 | H   | GLU | A | 363 | 26.360 | 46.134 | 15.978 | 1.00 | 0.00 |
| ATOM | 5256 | HA  | GLU | A | 363 | 24.895 | 46.541 | 18.487 | 1.00 | 0.00 |
| ATOM | 5257 | 1HB | GLU | A | 363 | 26.744 | 48.160 | 18.669 | 1.00 | 0.00 |
| ATOM | 5258 | 2HB | GLU | A | 363 | 26.276 | 48.851 | 17.096 | 1.00 | 0.00 |
| ATOM | 5259 | 1HG | GLU | A | 363 | 24.051 | 49.552 | 18.125 | 1.00 | 0.00 |
| ATOM | 5260 | 2HG | GLU | A | 363 | 24.659 | 48.783 | 19.609 | 1.00 | 0.00 |
| ATOM | 5261 | N   | TRP | A | 364 | 22.906 | 47.456 | 17.439 | 1.00 | 0.00 |
| ATOM | 5262 | CA  | TRP | A | 364 | 21.638 | 47.772 | 16.786 | 1.00 | 0.00 |
| ATOM | 5263 | C   | TRP | A | 364 | 20.669 | 48.477 | 17.714 | 1.00 | 0.00 |
| ATOM | 5264 | O   | TRP | A | 364 | 20.765 | 48.376 | 18.938 | 1.00 | 0.00 |
| ATOM | 5265 | CB  | TRP | A | 364 | 20.976 | 46.523 | 16.143 | 1.00 | 0.00 |
| ATOM | 5266 | CG  | TRP | A | 364 | 20.359 | 45.505 | 17.100 | 1.00 | 0.00 |
| ATOM | 5267 | CD1 | TRP | A | 364 | 19.524 | 45.727 | 18.209 | 1.00 | 0.00 |
| ATOM | 5268 | CD2 | TRP | A | 364 | 20.455 | 44.062 | 17.034 | 1.00 | 0.00 |
| ATOM | 5269 | NE1 | TRP | A | 364 | 19.129 | 44.570 | 18.795 | 1.00 | 0.00 |
| ATOM | 5270 | CE2 | TRP | A | 364 | 19.688 | 43.516 | 18.090 | 1.00 | 0.00 |
| ATOM | 5271 | CE3 | TRP | A | 364 | 21.112 | 43.202 | 16.168 | 1.00 | 0.00 |
| ATOM | 5272 | CZ2 | TRP | A | 364 | 19.608 | 42.139 | 18.255 | 1.00 | 0.00 |
| ATOM | 5273 | CZ3 | TRP | A | 364 | 21.023 | 41.824 | 16.341 | 1.00 | 0.00 |
| ATOM | 5274 | CH2 | TRP | A | 364 | 20.276 | 41.291 | 17.382 | 1.00 | 0.00 |
| ATOM | 5275 | H   | TRP | A | 364 | 22.929 | 47.347 | 18.443 | 1.00 | 0.00 |
| ATOM | 5276 | HA  | TRP | A | 364 | 21.810 | 48.458 | 15.957 | 1.00 | 0.00 |
| ATOM | 5277 | 1HB | TRP | A | 364 | 20.159 | 46.824 | 15.487 | 1.00 | 0.00 |
| ATOM | 5278 | 2HB | TRP | A | 364 | 21.713 | 45.961 | 15.570 | 1.00 | 0.00 |
| ATOM | 5279 | HD1 | TRP | A | 364 | 19.301 | 46.763 | 18.458 | 1.00 | 0.00 |
| ATOM | 5280 | HE1 | TRP | A | 364 | 18.531 | 44.495 | 19.606 | 1.00 | 0.00 |
| ATOM | 5281 | HE3 | TRP | A | 364 | 21.707 | 43.580 | 15.337 | 1.00 | 0.00 |
| ATOM | 5282 | HZ2 | TRP | A | 364 | 19.013 | 41.741 | 19.077 | 1.00 | 0.00 |
| ATOM | 5283 | HZ3 | TRP | A | 364 | 21.551 | 41.173 | 15.644 | 1.00 | 0.00 |
| ATOM | 5284 | HH2 | TRP | A | 364 | 20.207 | 40.212 | 17.525 | 1.00 | 0.00 |
| ATOM | 5285 | N   | ASN | A | 365 | 19.728 | 49.194 | 17.113 | 1.00 | 0.00 |
| ATOM | 5286 | CA  | ASN | A | 365 | 18.725 | 49.926 | 17.863 | 1.00 | 0.00 |
| ATOM | 5287 | C   | ASN | A | 365 | 17.511 | 50.249 | 17.009 | 1.00 | 0.00 |
| ATOM | 5288 | O   | ASN | A | 365 | 17.284 | 49.619 | 15.979 | 1.00 | 0.00 |

PEDF\_P1\_final\_docking\_model.txt

|      |      |      |     |   |     |        |        |        |      |      |
|------|------|------|-----|---|-----|--------|--------|--------|------|------|
| ATOM | 5289 | CB   | ASN | A | 365 | 19.301 | 51.199 | 18.456 | 1.00 | 0.00 |
| ATOM | 5290 | CG   | ASN | A | 365 | 19.760 | 52.193 | 17.425 | 1.00 | 0.00 |
| ATOM | 5291 | OD1  | ASN | A | 365 | 19.462 | 52.063 | 16.232 | 1.00 | 0.00 |
| ATOM | 5292 | ND2  | ASN | A | 365 | 20.551 | 53.138 | 17.865 | 1.00 | 0.00 |
| ATOM | 5293 | H    | ASN | A | 365 | 19.711 | 49.230 | 16.104 | 1.00 | 0.00 |
| ATOM | 5294 | HA   | ASN | A | 365 | 18.360 | 49.313 | 18.689 | 1.00 | 0.00 |
| ATOM | 5295 | 1HB  | ASN | A | 365 | 18.781 | 51.728 | 19.255 | 1.00 | 0.00 |
| ATOM | 5296 | 2HB  | ASN | A | 365 | 20.173 | 50.689 | 18.865 | 1.00 | 0.00 |
| ATOM | 5297 | 1HD2 | ASN | A | 365 | 20.896 | 53.834 | 17.235 | 1.00 | 0.00 |
| ATOM | 5298 | 2HD2 | ASN | A | 365 | 20.811 | 53.163 | 18.830 | 1.00 | 0.00 |
| ATOM | 5299 | N    | GLU | A | 366 | 16.739 | 51.233 | 17.458 | 1.00 | 0.00 |
| ATOM | 5300 | CA   | GLU | A | 366 | 15.515 | 51.662 | 16.786 | 1.00 | 0.00 |
| ATOM | 5301 | C    | GLU | A | 366 | 15.671 | 52.171 | 15.359 | 1.00 | 0.00 |
| ATOM | 5302 | O    | GLU | A | 366 | 14.770 | 52.007 | 14.544 | 1.00 | 0.00 |
| ATOM | 5303 | CB   | GLU | A | 366 | 14.839 | 52.749 | 17.625 | 1.00 | 0.00 |
| ATOM | 5304 | CG   | GLU | A | 366 | 14.290 | 52.263 | 18.959 | 1.00 | 0.00 |
| ATOM | 5305 | CD   | GLU | A | 366 | 15.373 | 52.181 | 19.998 | 1.00 | 0.00 |
| ATOM | 5306 | OE1  | GLU | A | 366 | 16.498 | 52.484 | 19.682 | 1.00 | 0.00 |
| ATOM | 5307 | OE2  | GLU | A | 366 | 15.058 | 51.925 | 21.136 | 1.00 | 0.00 |
| ATOM | 5308 | H    | GLU | A | 366 | 17.023 | 51.700 | 18.307 | 1.00 | 0.00 |
| ATOM | 5309 | HA   | GLU | A | 366 | 14.836 | 50.815 | 16.678 | 1.00 | 0.00 |
| ATOM | 5310 | 1HB  | GLU | A | 366 | 15.585 | 53.525 | 17.801 | 1.00 | 0.00 |
| ATOM | 5311 | 2HB  | GLU | A | 366 | 14.026 | 53.156 | 17.024 | 1.00 | 0.00 |
| ATOM | 5312 | 1HG  | GLU | A | 366 | 13.470 | 52.873 | 19.337 | 1.00 | 0.00 |
| ATOM | 5313 | 2HG  | GLU | A | 366 | 13.924 | 51.262 | 18.736 | 1.00 | 0.00 |
| ATOM | 5314 | N    | ASP | A | 367 | 16.808 | 52.782 | 15.056 | 1.00 | 0.00 |
| ATOM | 5315 | CA   | ASP | A | 367 | 17.047 | 53.334 | 13.727 | 1.00 | 0.00 |
| ATOM | 5316 | C    | ASP | A | 367 | 16.677 | 52.424 | 12.567 | 1.00 | 0.00 |
| ATOM | 5317 | O    | ASP | A | 367 | 17.120 | 51.280 | 12.486 | 1.00 | 0.00 |
| ATOM | 5318 | CB   | ASP | A | 367 | 18.520 | 53.729 | 13.599 | 1.00 | 0.00 |
| ATOM | 5319 | CG   | ASP | A | 367 | 18.911 | 54.967 | 14.394 | 1.00 | 0.00 |
| ATOM | 5320 | OD1  | ASP | A | 367 | 18.035 | 55.616 | 14.915 | 1.00 | 0.00 |
| ATOM | 5321 | OD2  | ASP | A | 367 | 20.083 | 55.166 | 14.607 | 1.00 | 0.00 |
| ATOM | 5322 | H    | ASP | A | 367 | 17.526 | 52.868 | 15.761 | 1.00 | 0.00 |
| ATOM | 5323 | HA   | ASP | A | 367 | 16.425 | 54.217 | 13.576 | 1.00 | 0.00 |
| ATOM | 5324 | 1HB  | ASP | A | 367 | 19.209 | 52.916 | 13.831 | 1.00 | 0.00 |
| ATOM | 5325 | 2HB  | ASP | A | 367 | 18.566 | 53.953 | 12.533 | 1.00 | 0.00 |
| ATOM | 5326 | N    | GLY | A | 368 | 15.854 | 52.955 | 11.670 | 1.00 | 0.00 |
| ATOM | 5327 | CA   | GLY | A | 368 | 15.423 | 52.206 | 10.510 | 1.00 | 0.00 |
| ATOM | 5328 | C    | GLY | A | 368 | 15.320 | 53.130 | 9.316  | 1.00 | 0.00 |
| ATOM | 5329 | O    | GLY | A | 368 | 15.651 | 54.309 | 9.414  | 1.00 | 0.00 |
| ATOM | 5330 | H    | GLY | A | 368 | 15.521 | 53.900 | 11.797 | 1.00 | 0.00 |
| ATOM | 5331 | 1HA  | GLY | A | 368 | 16.148 | 51.418 | 10.305 | 1.00 | 0.00 |
| ATOM | 5332 | 2HA  | GLY | A | 368 | 14.451 | 51.759 | 10.715 | 1.00 | 0.00 |
| ATOM | 5333 | N    | ALA | A | 369 | 14.864 | 52.597 | 8.189  | 1.00 | 0.00 |
| ATOM | 5334 | CA   | ALA | A | 369 | 14.718 | 53.383 | 6.968  | 1.00 | 0.00 |
| ATOM | 5335 | C    | ALA | A | 369 | 13.421 | 54.197 | 6.981  | 1.00 | 0.00 |
| ATOM | 5336 | O    | ALA | A | 369 | 13.449 | 55.427 | 7.001  | 1.00 | 0.00 |
| ATOM | 5337 | CB   | ALA | A | 369 | 14.764 | 52.484 | 5.730  | 1.00 | 0.00 |
| ATOM | 5338 | H    | ALA | A | 369 | 14.611 | 51.619 | 8.178  | 1.00 | 0.00 |
| ATOM | 5339 | HA   | ALA | A | 369 | 15.543 | 54.092 | 6.908  | 1.00 | 0.00 |
| ATOM | 5340 | 1HB  | ALA | A | 369 | 14.653 | 53.095 | 4.834  | 1.00 | 0.00 |
| ATOM | 5341 | 2HB  | ALA | A | 369 | 15.719 | 51.960 | 5.696  | 1.00 | 0.00 |
| ATOM | 5342 | 3HB  | ALA | A | 369 | 13.953 | 51.759 | 5.777  | 1.00 | 0.00 |
| ATOM | 5343 | N    | GLY | A | 370 | 12.286 | 53.505 | 6.961  | 1.00 | 0.00 |
| ATOM | 5344 | CA   | GLY | A | 370 | 11.002 | 54.179 | 6.972  | 1.00 | 0.00 |
| ATOM | 5345 | C    | GLY | A | 370 | 10.038 | 53.456 | 7.886  | 1.00 | 0.00 |
| ATOM | 5346 | O    | GLY | A | 370 | 10.388 | 53.113 | 9.012  | 1.00 | 0.00 |
| ATOM | 5347 | H    | GLY | A | 370 | 12.312 | 52.496 | 6.938  | 1.00 | 0.00 |
| ATOM | 5348 | 1HA  | GLY | A | 370 | 11.139 | 55.201 | 7.324  | 1.00 | 0.00 |
| ATOM | 5349 | 2HA  | GLY | A | 370 | 10.600 | 54.196 | 5.960  | 1.00 | 0.00 |
| ATOM | 5350 | N    | THR | A | 371 | 8.822  | 53.221 | 7.402  | 1.00 | 0.00 |
| ATOM | 5351 | CA   | THR | A | 371 | 7.804  | 52.525 | 8.184  | 1.00 | 0.00 |

PEDF\_P1\_final\_docking\_model.txt

|      |      |      |     |   |     |         |        |        |      |      |
|------|------|------|-----|---|-----|---------|--------|--------|------|------|
| ATOM | 5352 | C    | THR | A | 371 | 6.769   | 51.866 | 7.263  | 1.00 | 0.00 |
| ATOM | 5353 | O    | THR | A | 371 | 6.282   | 52.490 | 6.317  | 1.00 | 0.00 |
| ATOM | 5354 | CB   | THR | A | 371 | 7.086   | 53.480 | 9.156  | 1.00 | 0.00 |
| ATOM | 5355 | OG1  | THR | A | 371 | 6.091   | 52.757 | 9.892  | 1.00 | 0.00 |
| ATOM | 5356 | CG2  | THR | A | 371 | 6.422   | 54.617 | 8.394  | 1.00 | 0.00 |
| ATOM | 5357 | H    | THR | A | 371 | 8.597   | 53.533 | 6.468  | 1.00 | 0.00 |
| ATOM | 5358 | HA   | THR | A | 371 | 8.266   | 51.723 | 8.760  | 1.00 | 0.00 |
| ATOM | 5359 | HB   | THR | A | 371 | 7.816   | 53.889 | 9.854  | 1.00 | 0.00 |
| ATOM | 5360 | HG1  | THR | A | 371 | 5.451   | 52.383 | 9.282  | 1.00 | 0.00 |
| ATOM | 5361 | 1HG2 | THR | A | 371 | 5.921   | 55.281 | 9.098  | 1.00 | 0.00 |
| ATOM | 5362 | 2HG2 | THR | A | 371 | 7.179   | 55.175 | 7.842  | 1.00 | 0.00 |
| ATOM | 5363 | 3HG2 | THR | A | 371 | 5.692   | 54.208 | 7.697  | 1.00 | 0.00 |
| ATOM | 5364 | N    | THR | A | 372 | 6.445   | 50.605 | 7.546  | 1.00 | 0.00 |
| ATOM | 5365 | CA   | THR | A | 372 | 5.473   | 49.842 | 6.759  | 1.00 | 0.00 |
| ATOM | 5366 | C    | THR | A | 372 | 5.518   | 50.184 | 5.268  | 1.00 | 0.00 |
| ATOM | 5367 | O    | THR | A | 372 | 6.522   | 49.946 | 4.592  | 1.00 | 0.00 |
| ATOM | 5368 | CB   | THR | A | 372 | 4.040   | 50.072 | 7.274  | 1.00 | 0.00 |
| ATOM | 5369 | OG1  | THR | A | 372 | 3.690   | 51.454 | 7.117  | 1.00 | 0.00 |
| ATOM | 5370 | CG2  | THR | A | 372 | 3.933   | 49.689 | 8.742  | 1.00 | 0.00 |
| ATOM | 5371 | H    | THR | A | 372 | 6.892   | 50.164 | 8.337  | 1.00 | 0.00 |
| ATOM | 5372 | HA   | THR | A | 372 | 5.703   | 48.778 | 6.819  | 1.00 | 0.00 |
| ATOM | 5373 | HB   | THR | A | 372 | 3.351   | 49.463 | 6.689  | 1.00 | 0.00 |
| ATOM | 5374 | HG1  | THR | A | 372 | 3.737   | 51.692 | 6.188  | 1.00 | 0.00 |
| ATOM | 5375 | 1HG2 | THR | A | 372 | 2.913   | 49.859 | 9.088  | 1.00 | 0.00 |
| ATOM | 5376 | 2HG2 | THR | A | 372 | 4.188   | 48.637 | 8.863  | 1.00 | 0.00 |
| ATOM | 5377 | 3HG2 | THR | A | 372 | 4.621   | 50.299 | 9.327  | 1.00 | 0.00 |
| ATOM | 5378 | N    | HIS | A | 373 | -9.014  | 42.039 | 6.802  | 1.00 | 0.00 |
| ATOM | 5379 | CA   | HIS | A | 373 | -9.947  | 41.418 | 7.740  | 1.00 | 0.00 |
| ATOM | 5380 | C    | HIS | A | 373 | -9.490  | 39.989 | 8.008  | 1.00 | 0.00 |
| ATOM | 5381 | O    | HIS | A | 373 | -9.156  | 39.260 | 7.072  | 1.00 | 0.00 |
| ATOM | 5382 | CB   | HIS | A | 373 | -11.380 | 41.433 | 7.198  | 1.00 | 0.00 |
| ATOM | 5383 | CG   | HIS | A | 373 | -12.381 | 40.819 | 8.127  | 1.00 | 0.00 |
| ATOM | 5384 | ND1  | HIS | A | 373 | -12.744 | 41.406 | 9.321  | 1.00 | 0.00 |
| ATOM | 5385 | CD2  | HIS | A | 373 | -13.094 | 39.672 | 8.038  | 1.00 | 0.00 |
| ATOM | 5386 | CE1  | HIS | A | 373 | -13.640 | 40.645 | 9.926  | 1.00 | 0.00 |
| ATOM | 5387 | NE2  | HIS | A | 373 | -13.868 | 39.588 | 9.169  | 1.00 | 0.00 |
| ATOM | 5388 | H    | HIS | A | 373 | -9.232  | 42.035 | 5.816  | 1.00 | 0.00 |
| ATOM | 5389 | HA   | HIS | A | 373 | -9.933  | 41.961 | 8.684  | 1.00 | 0.00 |
| ATOM | 5390 | 1HB  | HIS | A | 373 | -11.706 | 42.458 | 7.022  | 1.00 | 0.00 |
| ATOM | 5391 | 2HB  | HIS | A | 373 | -11.434 | 40.871 | 6.265  | 1.00 | 0.00 |
| ATOM | 5392 | HD1  | HIS | A | 373 | -12.453 | 42.304 | 9.651  | 1.00 | 0.00 |
| ATOM | 5393 | HD2  | HIS | A | 373 | -13.142 | 38.886 | 7.284  | 1.00 | 0.00 |
| ATOM | 5394 | HE1  | HIS | A | 373 | -14.056 | 40.938 | 10.890 | 1.00 | 0.00 |
| ATOM | 5395 | N    | LEU | A | 374 | -9.501  | 39.583 | 9.275  | 1.00 | 0.00 |
| ATOM | 5396 | CA   | LEU | A | 374 | -9.041  | 38.249 | 9.663  | 1.00 | 0.00 |
| ATOM | 5397 | C    | LEU | A | 374 | -7.513  | 38.224 | 9.603  | 1.00 | 0.00 |
| ATOM | 5398 | O    | LEU | A | 374 | -6.910  | 38.468 | 8.562  | 1.00 | 0.00 |
| ATOM | 5399 | CB   | LEU | A | 374 | -9.685  | 37.070 | 8.916  | 1.00 | 0.00 |
| ATOM | 5400 | CG   | LEU | A | 374 | -11.178 | 36.932 | 9.213  | 1.00 | 0.00 |
| ATOM | 5401 | CD1  | LEU | A | 374 | -11.829 | 35.842 | 8.361  | 1.00 | 0.00 |
| ATOM | 5402 | CD2  | LEU | A | 374 | -11.442 | 36.737 | 10.707 | 1.00 | 0.00 |
| ATOM | 5403 | H    | LEU | A | 374 | -9.837  | 40.214 | 9.988  | 1.00 | 0.00 |
| ATOM | 5404 | HA   | LEU | A | 374 | -9.343  | 38.043 | 10.689 | 1.00 | 0.00 |
| ATOM | 5405 | 1HB  | LEU | A | 374 | -9.520  | 37.398 | 7.891  | 1.00 | 0.00 |
| ATOM | 5406 | 2HB  | LEU | A | 374 | -9.146  | 36.139 | 9.090  | 1.00 | 0.00 |
| ATOM | 5407 | HG   | LEU | A | 374 | -11.653 | 37.871 | 8.928  | 1.00 | 0.00 |
| ATOM | 5408 | 1HD1 | LEU | A | 374 | -12.890 | 35.776 | 8.602  | 1.00 | 0.00 |
| ATOM | 5409 | 2HD1 | LEU | A | 374 | -11.713 | 36.087 | 7.305  | 1.00 | 0.00 |
| ATOM | 5410 | 3HD1 | LEU | A | 374 | -11.350 | 34.885 | 8.567  | 1.00 | 0.00 |
| ATOM | 5411 | 1HD2 | LEU | A | 374 | -12.515 | 36.644 | 10.877 | 1.00 | 0.00 |
| ATOM | 5412 | 2HD2 | LEU | A | 374 | -10.939 | 35.833 | 11.051 | 1.00 | 0.00 |
| ATOM | 5413 | 3HD2 | LEU | A | 374 | -11.061 | 37.596 | 11.259 | 1.00 | 0.00 |
| ATOM | 5414 | N    | THR | A | 375 | -6.887  | 37.924 | 10.731 | 1.00 | 0.00 |

PEDF\_P1\_final\_docking\_model.txt

|      |      |      |     |   |     |        |        |        |      |      |
|------|------|------|-----|---|-----|--------|--------|--------|------|------|
| ATOM | 5415 | CA   | THR | A | 375 | -5.443 | 37.884 | 10.797 | 1.00 | 0.00 |
| ATOM | 5416 | C    | THR | A | 375 | -4.995 | 36.583 | 11.425 | 1.00 | 0.00 |
| ATOM | 5417 | O    | THR | A | 375 | -5.788 | 35.655 | 11.586 | 1.00 | 0.00 |
| ATOM | 5418 | CB   | THR | A | 375 | -4.872 | 39.066 | 11.602 | 1.00 | 0.00 |
| ATOM | 5419 | OG1  | THR | A | 375 | -5.288 | 38.961 | 12.970 | 1.00 | 0.00 |
| ATOM | 5420 | CG2  | THR | A | 375 | -5.359 | 40.387 | 11.029 | 1.00 | 0.00 |
| ATOM | 5421 | H    | THR | A | 375 | -7.423 | 37.719 | 11.562 | 1.00 | 0.00 |
| ATOM | 5422 | HA   | THR | A | 375 | -5.027 | 37.919 | 9.790  | 1.00 | 0.00 |
| ATOM | 5423 | HB   | THR | A | 375 | -3.783 | 39.031 | 11.559 | 1.00 | 0.00 |
| ATOM | 5424 | HG1  | THR | A | 375 | -4.930 | 39.698 | 13.470 | 1.00 | 0.00 |
| ATOM | 5425 | 1HG2 | THR | A | 375 | -4.944 | 41.210 | 11.611 | 1.00 | 0.00 |
| ATOM | 5426 | 2HG2 | THR | A | 375 | -5.034 | 40.475 | 9.992  | 1.00 | 0.00 |
| ATOM | 5427 | 3HG2 | THR | A | 375 | -6.446 | 40.423 | 11.072 | 1.00 | 0.00 |
| ATOM | 5428 | N    | PHE | A | 376 | -3.715 | 36.531 | 11.778 | 1.00 | 0.00 |
| ATOM | 5429 | CA   | PHE | A | 376 | -3.120 | 35.357 | 12.392 | 1.00 | 0.00 |
| ATOM | 5430 | C    | PHE | A | 376 | -2.317 | 35.783 | 13.625 | 1.00 | 0.00 |
| ATOM | 5431 | O    | PHE | A | 376 | -1.516 | 36.714 | 13.573 | 1.00 | 0.00 |
| ATOM | 5432 | CB   | PHE | A | 376 | -2.230 | 34.614 | 11.394 | 1.00 | 0.00 |
| ATOM | 5433 | CG   | PHE | A | 376 | -1.581 | 33.383 | 11.959 | 1.00 | 0.00 |
| ATOM | 5434 | CD1  | PHE | A | 376 | -2.303 | 32.209 | 12.111 | 1.00 | 0.00 |
| ATOM | 5435 | CD2  | PHE | A | 376 | -0.248 | 33.397 | 12.342 | 1.00 | 0.00 |
| ATOM | 5436 | CE1  | PHE | A | 376 | -1.707 | 31.075 | 12.631 | 1.00 | 0.00 |
| ATOM | 5437 | CE2  | PHE | A | 376 | 0.350  | 32.266 | 12.861 | 1.00 | 0.00 |
| ATOM | 5438 | CZ   | PHE | A | 376 | -0.381 | 31.104 | 13.006 | 1.00 | 0.00 |
| ATOM | 5439 | H    | PHE | A | 376 | -3.139 | 37.343 | 11.610 | 1.00 | 0.00 |
| ATOM | 5440 | HA   | PHE | A | 376 | -3.904 | 34.677 | 12.727 | 1.00 | 0.00 |
| ATOM | 5441 | 1HB  | PHE | A | 376 | -2.817 | 34.291 | 10.536 | 1.00 | 0.00 |
| ATOM | 5442 | 2HB  | PHE | A | 376 | -1.423 | 35.264 | 11.056 | 1.00 | 0.00 |
| ATOM | 5443 | HD1  | PHE | A | 376 | -3.352 | 32.186 | 11.813 | 1.00 | 0.00 |
| ATOM | 5444 | HD2  | PHE | A | 376 | 0.329  | 34.315 | 12.228 | 1.00 | 0.00 |
| ATOM | 5445 | HE1  | PHE | A | 376 | -2.286 | 30.159 | 12.745 | 1.00 | 0.00 |
| ATOM | 5446 | HE2  | PHE | A | 376 | 1.399  | 32.290 | 13.157 | 1.00 | 0.00 |
| ATOM | 5447 | HZ   | PHE | A | 376 | 0.089  | 30.211 | 13.418 | 1.00 | 0.00 |
| ATOM | 5448 | N    | PRO | A | 377 | -2.537 | 35.107 | 14.760 | 1.00 | 0.00 |
| ATOM | 5449 | CA   | PRO | A | 377 | -1.823 | 35.428 | 16.004 | 1.00 | 0.00 |
| ATOM | 5450 | C    | PRO | A | 377 | -0.354 | 35.028 | 15.916 | 1.00 | 0.00 |
| ATOM | 5451 | O    | PRO | A | 377 | -0.028 | 33.977 | 15.364 | 1.00 | 0.00 |
| ATOM | 5452 | CB   | PRO | A | 377 | -2.569 | 34.637 | 17.083 | 1.00 | 0.00 |
| ATOM | 5453 | CG   | PRO | A | 377 | -3.186 | 33.496 | 16.348 | 1.00 | 0.00 |
| ATOM | 5454 | CD   | PRO | A | 377 | -3.521 | 34.036 | 14.983 | 1.00 | 0.00 |
| ATOM | 5455 | HA   | PRO | A | 377 | -1.812 | 36.506 | 16.222 | 1.00 | 0.00 |
| ATOM | 5456 | 1HB  | PRO | A | 377 | -1.885 | 34.282 | 17.868 | 1.00 | 0.00 |
| ATOM | 5457 | 2HB  | PRO | A | 377 | -3.335 | 35.253 | 17.578 | 1.00 | 0.00 |
| ATOM | 5458 | 1HG  | PRO | A | 377 | -2.491 | 32.646 | 16.277 | 1.00 | 0.00 |
| ATOM | 5459 | 2HG  | PRO | A | 377 | -4.088 | 33.133 | 16.862 | 1.00 | 0.00 |
| ATOM | 5460 | 1HD  | PRO | A | 377 | -3.428 | 33.271 | 14.199 | 1.00 | 0.00 |
| ATOM | 5461 | 2HD  | PRO | A | 377 | -4.549 | 34.425 | 14.931 | 1.00 | 0.00 |
| ATOM | 5462 | N    | LEU | A | 378 | 0.536  | 35.852 | 16.458 | 1.00 | 0.00 |
| ATOM | 5463 | CA   | LEU | A | 378 | 1.949  | 35.503 | 16.438 | 1.00 | 0.00 |
| ATOM | 5464 | C    | LEU | A | 378 | 2.804  | 36.310 | 17.402 | 1.00 | 0.00 |
| ATOM | 5465 | O    | LEU | A | 378 | 2.956  | 37.522 | 17.262 | 1.00 | 0.00 |
| ATOM | 5466 | CB   | LEU | A | 378 | 2.539  | 35.605 | 15.032 | 1.00 | 0.00 |
| ATOM | 5467 | CG   | LEU | A | 378 | 3.923  | 34.965 | 14.971 | 1.00 | 0.00 |
| ATOM | 5468 | CD1  | LEU | A | 378 | 3.882  | 33.495 | 15.390 | 1.00 | 0.00 |
| ATOM | 5469 | CD2  | LEU | A | 378 | 4.573  | 35.164 | 13.607 | 1.00 | 0.00 |
| ATOM | 5470 | H    | LEU | A | 378 | 0.250  | 36.721 | 16.886 | 1.00 | 0.00 |
| ATOM | 5471 | HA   | LEU | A | 378 | 2.074  | 34.469 | 16.759 | 1.00 | 0.00 |
| ATOM | 5472 | 1HB  | LEU | A | 378 | 1.802  | 35.016 | 14.488 | 1.00 | 0.00 |
| ATOM | 5473 | 2HB  | LEU | A | 378 | 2.529  | 36.631 | 14.663 | 1.00 | 0.00 |
| ATOM | 5474 | HG   | LEU | A | 378 | 4.550  | 35.480 | 15.699 | 1.00 | 0.00 |
| ATOM | 5475 | 1HD1 | LEU | A | 378 | 4.885  | 33.072 | 15.334 | 1.00 | 0.00 |
| ATOM | 5476 | 2HD1 | LEU | A | 378 | 3.513  | 33.418 | 16.413 | 1.00 | 0.00 |
| ATOM | 5477 | 3HD1 | LEU | A | 378 | 3.220  | 32.945 | 14.723 | 1.00 | 0.00 |

PEDF\_P1\_final\_docking\_model.txt

|      |      |      |     |   |     |        |        |        |      |      |
|------|------|------|-----|---|-----|--------|--------|--------|------|------|
| ATOM | 5478 | 1HD2 | LEU | A | 378 | 5.558  | 34.695 | 13.602 | 1.00 | 0.00 |
| ATOM | 5479 | 2HD2 | LEU | A | 378 | 3.950  | 34.709 | 12.837 | 1.00 | 0.00 |
| ATOM | 5480 | 3HD2 | LEU | A | 378 | 4.678  | 36.230 | 13.406 | 1.00 | 0.00 |
| ATOM | 5481 | N    | ASP | A | 379 | 3.359  | 35.615 | 18.387 | 1.00 | 0.00 |
| ATOM | 5482 | CA   | ASP | A | 379 | 4.218  | 36.229 | 19.387 | 1.00 | 0.00 |
| ATOM | 5483 | C    | ASP | A | 379 | 5.676  | 35.871 | 19.160 | 1.00 | 0.00 |
| ATOM | 5484 | O    | ASP | A | 379 | 6.021  | 34.697 | 18.993 | 1.00 | 0.00 |
| ATOM | 5485 | CB   | ASP | A | 379 | 3.788  | 35.807 | 20.794 | 1.00 | 0.00 |
| ATOM | 5486 | CG   | ASP | A | 379 | 2.413  | 36.314 | 21.210 | 1.00 | 0.00 |
| ATOM | 5487 | OD1  | ASP | A | 379 | 2.178  | 37.494 | 21.097 | 1.00 | 0.00 |
| ATOM | 5488 | OD2  | ASP | A | 379 | 1.562  | 35.503 | 21.487 | 1.00 | 0.00 |
| ATOM | 5489 | H    | ASP | A | 379 | 3.174  | 34.623 | 18.439 | 1.00 | 0.00 |
| ATOM | 5490 | HA   | ASP | A | 379 | 4.153  | 37.315 | 19.313 | 1.00 | 0.00 |
| ATOM | 5491 | 1HB  | ASP | A | 379 | 3.843  | 34.731 | 20.961 | 1.00 | 0.00 |
| ATOM | 5492 | 2HB  | ASP | A | 379 | 4.554  | 36.308 | 21.387 | 1.00 | 0.00 |
| ATOM | 5493 | N    | TYR | A | 380 | 6.534  | 36.881 | 19.138 | 1.00 | 0.00 |
| ATOM | 5494 | CA   | TYR | A | 380 | 7.955  | 36.631 | 18.987 | 1.00 | 0.00 |
| ATOM | 5495 | C    | TYR | A | 380 | 8.684  | 37.574 | 19.927 | 1.00 | 0.00 |
| ATOM | 5496 | O    | TYR | A | 380 | 9.085  | 38.678 | 19.548 | 1.00 | 0.00 |
| ATOM | 5497 | CB   | TYR | A | 380 | 8.381  | 36.824 | 17.533 | 1.00 | 0.00 |
| ATOM | 5498 | CG   | TYR | A | 380 | 9.714  | 36.148 | 17.354 | 1.00 | 0.00 |
| ATOM | 5499 | CD1  | TYR | A | 380 | 9.765  | 34.772 | 17.170 | 1.00 | 0.00 |
| ATOM | 5500 | CD2  | TYR | A | 380 | 10.884 | 36.893 | 17.399 | 1.00 | 0.00 |
| ATOM | 5501 | CE1  | TYR | A | 380 | 10.994 | 34.133 | 17.073 | 1.00 | 0.00 |
| ATOM | 5502 | CE2  | TYR | A | 380 | 12.110 | 36.254 | 17.306 | 1.00 | 0.00 |
| ATOM | 5503 | CZ   | TYR | A | 380 | 12.164 | 34.875 | 17.165 | 1.00 | 0.00 |
| ATOM | 5504 | OH   | TYR | A | 380 | 13.386 | 34.244 | 17.126 | 1.00 | 0.00 |
| ATOM | 5505 | H    | TYR | A | 380 | 6.209  | 37.833 | 19.226 | 1.00 | 0.00 |
| ATOM | 5506 | HA   | TYR | A | 380 | 8.182  | 35.603 | 19.270 | 1.00 | 0.00 |
| ATOM | 5507 | 1HB  | TYR | A | 380 | 7.603  | 36.384 | 16.907 | 1.00 | 0.00 |
| ATOM | 5508 | 2HB  | TYR | A | 380 | 8.430  | 37.897 | 17.351 | 1.00 | 0.00 |
| ATOM | 5509 | HD1  | TYR | A | 380 | 8.830  | 34.215 | 17.106 | 1.00 | 0.00 |
| ATOM | 5510 | HD2  | TYR | A | 380 | 10.815 | 37.975 | 17.509 | 1.00 | 0.00 |
| ATOM | 5511 | HE1  | TYR | A | 380 | 11.044 | 33.054 | 16.929 | 1.00 | 0.00 |
| ATOM | 5512 | HE2  | TYR | A | 380 | 13.032 | 36.835 | 17.344 | 1.00 | 0.00 |
| ATOM | 5513 | HH   | TYR | A | 380 | 14.125 | 34.852 | 17.204 | 1.00 | 0.00 |
| ATOM | 5514 | N    | HIS | A | 381 | 8.825  | 37.126 | 21.170 | 1.00 | 0.00 |
| ATOM | 5515 | CA   | HIS | A | 381 | 9.494  | 37.900 | 22.197 | 1.00 | 0.00 |
| ATOM | 5516 | C    | HIS | A | 381 | 10.855 | 37.311 | 22.539 | 1.00 | 0.00 |
| ATOM | 5517 | O    | HIS | A | 381 | 10.957 | 36.202 | 23.067 | 1.00 | 0.00 |
| ATOM | 5518 | CB   | HIS | A | 381 | 8.627  | 37.983 | 23.457 | 1.00 | 0.00 |
| ATOM | 5519 | CG   | HIS | A | 381 | 7.223  | 38.433 | 23.193 | 1.00 | 0.00 |
| ATOM | 5520 | ND1  | HIS | A | 381 | 6.894  | 39.753 | 22.971 | 1.00 | 0.00 |
| ATOM | 5521 | CD2  | HIS | A | 381 | 6.064  | 37.738 | 23.115 | 1.00 | 0.00 |
| ATOM | 5522 | CE1  | HIS | A | 381 | 5.592  | 39.851 | 22.767 | 1.00 | 0.00 |
| ATOM | 5523 | NE2  | HIS | A | 381 | 5.066  | 38.643 | 22.850 | 1.00 | 0.00 |
| ATOM | 5524 | H    | HIS | A | 381 | 8.453  | 36.217 | 21.403 | 1.00 | 0.00 |
| ATOM | 5525 | HA   | HIS | A | 381 | 9.680  | 38.910 | 21.832 | 1.00 | 0.00 |
| ATOM | 5526 | 1HB  | HIS | A | 381 | 8.556  | 37.004 | 23.931 | 1.00 | 0.00 |
| ATOM | 5527 | 2HB  | HIS | A | 381 | 9.055  | 38.696 | 24.161 | 1.00 | 0.00 |
| ATOM | 5528 | HD2  | HIS | A | 381 | 5.827  | 36.679 | 23.222 | 1.00 | 0.00 |
| ATOM | 5529 | HE1  | HIS | A | 381 | 5.132  | 40.819 | 22.571 | 1.00 | 0.00 |
| ATOM | 5530 | HE2  | HIS | A | 381 | 4.089  | 38.412 | 22.738 | 1.00 | 0.00 |
| ATOM | 5531 | N    | LEU | A | 382 | 11.894 | 38.075 | 22.221 | 1.00 | 0.00 |
| ATOM | 5532 | CA   | LEU | A | 382 | 13.266 | 37.698 | 22.488 | 1.00 | 0.00 |
| ATOM | 5533 | C    | LEU | A | 382 | 13.628 | 38.173 | 23.887 | 1.00 | 0.00 |
| ATOM | 5534 | O    | LEU | A | 382 | 14.425 | 39.100 | 24.053 | 1.00 | 0.00 |
| ATOM | 5535 | CB   | LEU | A | 382 | 14.212 | 38.293 | 21.438 | 1.00 | 0.00 |
| ATOM | 5536 | CG   | LEU | A | 382 | 14.042 | 37.740 | 20.017 | 1.00 | 0.00 |
| ATOM | 5537 | CD1  | LEU | A | 382 | 14.887 | 38.544 | 19.039 | 1.00 | 0.00 |
| ATOM | 5538 | CD2  | LEU | A | 382 | 14.438 | 36.272 | 19.992 | 1.00 | 0.00 |
| ATOM | 5539 | H    | LEU | A | 382 | 11.705 | 38.960 | 21.772 | 1.00 | 0.00 |
| ATOM | 5540 | HA   | LEU | A | 382 | 13.358 | 36.613 | 22.462 | 1.00 | 0.00 |



PEDF\_P1\_final\_docking\_model.txt

|      |      |      |     |   |     |        |        |        |      |      |
|------|------|------|-----|---|-----|--------|--------|--------|------|------|
| ATOM | 5541 | 1HB  | LEU | A | 382 | 13.888 | 39.332 | 21.476 | 1.00 | 0.00 |
| ATOM | 5542 | 2HB  | LEU | A | 382 | 15.254 | 38.227 | 21.749 | 1.00 | 0.00 |
| ATOM | 5543 | HG   | LEU | A | 382 | 12.982 | 37.803 | 19.770 | 1.00 | 0.00 |
| ATOM | 5544 | 1HD1 | LEU | A | 382 | 14.759 | 38.144 | 18.033 | 1.00 | 0.00 |
| ATOM | 5545 | 2HD1 | LEU | A | 382 | 14.570 | 39.587 | 19.056 | 1.00 | 0.00 |
| ATOM | 5546 | 3HD1 | LEU | A | 382 | 15.936 | 38.478 | 19.325 | 1.00 | 0.00 |
| ATOM | 5547 | 1HD2 | LEU | A | 382 | 14.316 | 35.879 | 18.982 | 1.00 | 0.00 |
| ATOM | 5548 | 2HD2 | LEU | A | 382 | 15.480 | 36.170 | 20.298 | 1.00 | 0.00 |
| ATOM | 5549 | 3HD2 | LEU | A | 382 | 13.803 | 35.711 | 20.678 | 1.00 | 0.00 |
| ATOM | 5550 | N    | ASN | A | 383 | 13.031 | 37.539 | 24.889 | 1.00 | 0.00 |
| ATOM | 5551 | CA   | ASN | A | 383 | 13.279 | 37.893 | 26.278 | 1.00 | 0.00 |
| ATOM | 5552 | C    | ASN | A | 383 | 13.921 | 36.731 | 27.023 | 1.00 | 0.00 |
| ATOM | 5553 | O    | ASN | A | 383 | 13.705 | 36.533 | 28.218 | 1.00 | 0.00 |
| ATOM | 5554 | CB   | ASN | A | 383 | 12.006 | 38.331 | 26.978 | 1.00 | 0.00 |
| ATOM | 5555 | CG   | ASN | A | 383 | 10.958 | 37.255 | 27.057 | 1.00 | 0.00 |
| ATOM | 5556 | OD1  | ASN | A | 383 | 11.105 | 36.173 | 26.478 | 1.00 | 0.00 |
| ATOM | 5557 | ND2  | ASN | A | 383 | 9.866  | 37.577 | 27.704 | 1.00 | 0.00 |
| ATOM | 5558 | H    | ASN | A | 383 | 12.387 | 36.790 | 24.680 | 1.00 | 0.00 |
| ATOM | 5559 | HA   | ASN | A | 383 | 13.982 | 38.726 | 26.328 | 1.00 | 0.00 |
| ATOM | 5560 | 1HB  | ASN | A | 383 | 12.046 | 38.862 | 27.930 | 1.00 | 0.00 |
| ATOM | 5561 | 2HB  | ASN | A | 383 | 11.734 | 39.028 | 26.185 | 1.00 | 0.00 |
| ATOM | 5562 | 1HD2 | ASN | A | 383 | 9.126  | 36.910 | 27.797 | 1.00 | 0.00 |
| ATOM | 5563 | 2HD2 | ASN | A | 383 | 9.772  | 38.488 | 28.104 | 1.00 | 0.00 |
| ATOM | 5564 | N    | GLN | A | 384 | 14.702 | 35.952 | 26.289 | 1.00 | 0.00 |
| ATOM | 5565 | CA   | GLN | A | 384 | 15.405 | 34.813 | 26.853 | 1.00 | 0.00 |
| ATOM | 5566 | C    | GLN | A | 384 | 16.569 | 34.508 | 25.914 | 1.00 | 0.00 |
| ATOM | 5567 | O    | GLN | A | 384 | 16.579 | 34.954 | 24.757 | 1.00 | 0.00 |
| ATOM | 5568 | CB   | GLN | A | 384 | 14.486 | 33.597 | 26.998 | 1.00 | 0.00 |
| ATOM | 5569 | CG   | GLN | A | 384 | 13.798 | 33.180 | 25.710 | 1.00 | 0.00 |
| ATOM | 5570 | CD   | GLN | A | 384 | 12.906 | 31.967 | 25.897 | 1.00 | 0.00 |
| ATOM | 5571 | OE1  | GLN | A | 384 | 11.771 | 32.080 | 26.368 | 1.00 | 0.00 |
| ATOM | 5572 | NE2  | GLN | A | 384 | 13.416 | 30.796 | 25.533 | 1.00 | 0.00 |
| ATOM | 5573 | H    | GLN | A | 384 | 14.810 | 36.159 | 25.306 | 1.00 | 0.00 |
| ATOM | 5574 | HA   | GLN | A | 384 | 15.795 | 35.075 | 27.836 | 1.00 | 0.00 |
| ATOM | 5575 | 1HB  | GLN | A | 384 | 15.102 | 32.779 | 27.370 | 1.00 | 0.00 |
| ATOM | 5576 | 2HB  | GLN | A | 384 | 13.737 | 33.857 | 27.748 | 1.00 | 0.00 |
| ATOM | 5577 | 1HG  | GLN | A | 384 | 13.273 | 33.885 | 25.066 | 1.00 | 0.00 |
| ATOM | 5578 | 2HG  | GLN | A | 384 | 14.718 | 32.859 | 25.221 | 1.00 | 0.00 |
| ATOM | 5579 | 1HE2 | GLN | A | 384 | 12.875 | 29.961 | 25.633 | 1.00 | 0.00 |
| ATOM | 5580 | 2HE2 | GLN | A | 384 | 14.342 | 30.749 | 25.158 | 1.00 | 0.00 |
| ATOM | 5581 | N    | PRO | A | 385 | 17.567 | 33.752 | 26.399 | 1.00 | 0.00 |
| ATOM | 5582 | CA   | PRO | A | 385 | 18.743 | 33.393 | 25.595 | 1.00 | 0.00 |
| ATOM | 5583 | C    | PRO | A | 385 | 18.402 | 32.978 | 24.161 | 1.00 | 0.00 |
| ATOM | 5584 | O    | PRO | A | 385 | 17.545 | 32.120 | 23.942 | 1.00 | 0.00 |
| ATOM | 5585 | CB   | PRO | A | 385 | 19.409 | 32.290 | 26.418 | 1.00 | 0.00 |
| ATOM | 5586 | CG   | PRO | A | 385 | 19.110 | 32.690 | 27.857 | 1.00 | 0.00 |
| ATOM | 5587 | CD   | PRO | A | 385 | 17.683 | 33.210 | 27.752 | 1.00 | 0.00 |
| ATOM | 5588 | HA   | PRO | A | 385 | 19.439 | 34.234 | 25.459 | 1.00 | 0.00 |
| ATOM | 5589 | 1HB  | PRO | A | 385 | 18.994 | 31.300 | 26.176 | 1.00 | 0.00 |
| ATOM | 5590 | 2HB  | PRO | A | 385 | 20.491 | 32.241 | 26.226 | 1.00 | 0.00 |
| ATOM | 5591 | 1HG  | PRO | A | 385 | 19.200 | 31.829 | 28.536 | 1.00 | 0.00 |
| ATOM | 5592 | 2HG  | PRO | A | 385 | 19.816 | 33.455 | 28.212 | 1.00 | 0.00 |
| ATOM | 5593 | 1HD  | PRO | A | 385 | 16.938 | 32.415 | 27.905 | 1.00 | 0.00 |
| ATOM | 5594 | 2HD  | PRO | A | 385 | 17.471 | 33.995 | 28.492 | 1.00 | 0.00 |
| ATOM | 5595 | N    | PHE | A | 386 | 19.075 | 33.599 | 23.194 | 1.00 | 0.00 |
| ATOM | 5596 | CA   | PHE | A | 386 | 18.859 | 33.300 | 21.780 | 1.00 | 0.00 |
| ATOM | 5597 | C    | PHE | A | 386 | 20.135 | 33.447 | 20.965 | 1.00 | 0.00 |
| ATOM | 5598 | O    | PHE | A | 386 | 21.165 | 33.892 | 21.459 | 1.00 | 0.00 |
| ATOM | 5599 | CB   | PHE | A | 386 | 17.769 | 34.207 | 21.206 | 1.00 | 0.00 |
| ATOM | 5600 | CG   | PHE | A | 386 | 18.121 | 35.668 | 21.232 | 1.00 | 0.00 |
| ATOM | 5601 | CD1  | PHE | A | 386 | 18.892 | 36.228 | 20.225 | 1.00 | 0.00 |
| ATOM | 5602 | CD2  | PHE | A | 386 | 17.682 | 36.483 | 22.264 | 1.00 | 0.00 |
| ATOM | 5603 | CE1  | PHE | A | 386 | 19.216 | 37.572 | 20.248 | 1.00 | 0.00 |

PEDF\_P1\_final\_docking\_model.txt

|      |      |      |     |   |     |        |        |        |      |      |
|------|------|------|-----|---|-----|--------|--------|--------|------|------|
| ATOM | 5604 | CE2  | PHE | A | 386 | 18.003 | 37.827 | 22.290 | 1.00 | 0.00 |
| ATOM | 5605 | CZ   | PHE | A | 386 | 18.771 | 38.371 | 21.280 | 1.00 | 0.00 |
| ATOM | 5606 | H    | PHE | A | 386 | 19.756 | 34.299 | 23.450 | 1.00 | 0.00 |
| ATOM | 5607 | HA   | PHE | A | 386 | 18.546 | 32.261 | 21.665 | 1.00 | 0.00 |
| ATOM | 5608 | 1HB  | PHE | A | 386 | 17.578 | 33.952 | 20.165 | 1.00 | 0.00 |
| ATOM | 5609 | 2HB  | PHE | A | 386 | 16.850 | 34.098 | 21.781 | 1.00 | 0.00 |
| ATOM | 5610 | HD1  | PHE | A | 386 | 19.242 | 35.597 | 19.409 | 1.00 | 0.00 |
| ATOM | 5611 | HD2  | PHE | A | 386 | 17.075 | 36.053 | 23.062 | 1.00 | 0.00 |
| ATOM | 5612 | HE1  | PHE | A | 386 | 19.823 | 37.999 | 19.451 | 1.00 | 0.00 |
| ATOM | 5613 | HE2  | PHE | A | 386 | 17.651 | 38.457 | 23.106 | 1.00 | 0.00 |
| ATOM | 5614 | HZ   | PHE | A | 386 | 19.027 | 39.429 | 21.300 | 1.00 | 0.00 |
| ATOM | 5615 | N    | ILE | A | 387 | 20.041 | 33.072 | 19.698 | 1.00 | 0.00 |
| ATOM | 5616 | CA   | ILE | A | 387 | 21.156 | 33.139 | 18.762 | 1.00 | 0.00 |
| ATOM | 5617 | C    | ILE | A | 387 | 20.689 | 33.926 | 17.529 | 1.00 | 0.00 |
| ATOM | 5618 | O    | ILE | A | 387 | 19.579 | 33.718 | 17.034 | 1.00 | 0.00 |
| ATOM | 5619 | CB   | ILE | A | 387 | 21.652 | 31.743 | 18.343 | 1.00 | 0.00 |
| ATOM | 5620 | CG1  | ILE | A | 387 | 22.147 | 30.964 | 19.565 | 1.00 | 0.00 |
| ATOM | 5621 | CG2  | ILE | A | 387 | 22.753 | 31.860 | 17.301 | 1.00 | 0.00 |
| ATOM | 5622 | CD1  | ILE | A | 387 | 22.442 | 29.508 | 19.282 | 1.00 | 0.00 |
| ATOM | 5623 | H    | ILE | A | 387 | 19.149 | 32.725 | 19.376 | 1.00 | 0.00 |
| ATOM | 5624 | HA   | ILE | A | 387 | 21.987 | 33.696 | 19.194 | 1.00 | 0.00 |
| ATOM | 5625 | HB   | ILE | A | 387 | 20.817 | 31.179 | 17.929 | 1.00 | 0.00 |
| ATOM | 5626 | 1HG1 | ILE | A | 387 | 23.053 | 31.456 | 19.918 | 1.00 | 0.00 |
| ATOM | 5627 | 2HG1 | ILE | A | 387 | 21.374 | 31.035 | 20.330 | 1.00 | 0.00 |
| ATOM | 5628 | 1HG2 | ILE | A | 387 | 23.092 | 30.864 | 17.016 | 1.00 | 0.00 |
| ATOM | 5629 | 2HG2 | ILE | A | 387 | 22.368 | 32.376 | 16.422 | 1.00 | 0.00 |
| ATOM | 5630 | 3HG2 | ILE | A | 387 | 23.589 | 32.423 | 17.715 | 1.00 | 0.00 |
| ATOM | 5631 | 1HD1 | ILE | A | 387 | 22.788 | 29.023 | 20.195 | 1.00 | 0.00 |
| ATOM | 5632 | 2HD1 | ILE | A | 387 | 21.536 | 29.014 | 18.930 | 1.00 | 0.00 |
| ATOM | 5633 | 3HD1 | ILE | A | 387 | 23.216 | 29.435 | 18.519 | 1.00 | 0.00 |
| ATOM | 5634 | N    | PHE | A | 388 | 21.506 | 34.853 | 17.048 | 1.00 | 0.00 |
| ATOM | 5635 | CA   | PHE | A | 388 | 21.121 | 35.592 | 15.852 | 1.00 | 0.00 |
| ATOM | 5636 | C    | PHE | A | 388 | 22.241 | 35.452 | 14.844 | 1.00 | 0.00 |
| ATOM | 5637 | O    | PHE | A | 388 | 23.402 | 35.300 | 15.211 | 1.00 | 0.00 |
| ATOM | 5638 | CB   | PHE | A | 388 | 20.850 | 37.065 | 16.164 | 1.00 | 0.00 |
| ATOM | 5639 | CG   | PHE | A | 388 | 22.091 | 37.865 | 16.438 | 1.00 | 0.00 |
| ATOM | 5640 | CD1  | PHE | A | 388 | 22.761 | 38.509 | 15.408 | 1.00 | 0.00 |
| ATOM | 5641 | CD2  | PHE | A | 388 | 22.593 | 37.975 | 17.727 | 1.00 | 0.00 |
| ATOM | 5642 | CE1  | PHE | A | 388 | 23.903 | 39.245 | 15.660 | 1.00 | 0.00 |
| ATOM | 5643 | CE2  | PHE | A | 388 | 23.734 | 38.711 | 17.981 | 1.00 | 0.00 |
| ATOM | 5644 | CZ   | PHE | A | 388 | 24.390 | 39.346 | 16.946 | 1.00 | 0.00 |
| ATOM | 5645 | H    | PHE | A | 388 | 22.390 | 35.060 | 17.491 | 1.00 | 0.00 |
| ATOM | 5646 | HA   | PHE | A | 388 | 20.212 | 35.163 | 15.429 | 1.00 | 0.00 |
| ATOM | 5647 | 1HB  | PHE | A | 388 | 20.352 | 37.542 | 15.321 | 1.00 | 0.00 |
| ATOM | 5648 | 2HB  | PHE | A | 388 | 20.222 | 37.150 | 17.050 | 1.00 | 0.00 |
| ATOM | 5649 | HD1  | PHE | A | 388 | 22.375 | 38.429 | 14.391 | 1.00 | 0.00 |
| ATOM | 5650 | HD2  | PHE | A | 388 | 22.075 | 37.472 | 18.544 | 1.00 | 0.00 |
| ATOM | 5651 | HE1  | PHE | A | 388 | 24.419 | 39.745 | 14.841 | 1.00 | 0.00 |
| ATOM | 5652 | HE2  | PHE | A | 388 | 24.117 | 38.790 | 18.998 | 1.00 | 0.00 |
| ATOM | 5653 | HZ   | PHE | A | 388 | 25.290 | 39.925 | 17.144 | 1.00 | 0.00 |
| ATOM | 5654 | N    | VAL | A | 389 | 21.887 | 35.492 | 13.570 | 1.00 | 0.00 |
| ATOM | 5655 | CA   | VAL | A | 389 | 22.865 | 35.351 | 12.516 | 1.00 | 0.00 |
| ATOM | 5656 | C    | VAL | A | 389 | 22.667 | 36.460 | 11.515 | 1.00 | 0.00 |
| ATOM | 5657 | O    | VAL | A | 389 | 21.639 | 36.505 | 10.845 | 1.00 | 0.00 |
| ATOM | 5658 | CB   | VAL | A | 389 | 22.763 | 33.988 | 11.806 | 1.00 | 0.00 |
| ATOM | 5659 | CG1  | VAL | A | 389 | 23.796 | 33.889 | 10.693 | 1.00 | 0.00 |
| ATOM | 5660 | CG2  | VAL | A | 389 | 22.945 | 32.853 | 12.802 | 1.00 | 0.00 |
| ATOM | 5661 | H    | VAL | A | 389 | 20.916 | 35.623 | 13.326 | 1.00 | 0.00 |
| ATOM | 5662 | HA   | VAL | A | 389 | 23.880 | 35.461 | 12.900 | 1.00 | 0.00 |
| ATOM | 5663 | HB   | VAL | A | 389 | 21.763 | 33.882 | 11.384 | 1.00 | 0.00 |
| ATOM | 5664 | 1HG1 | VAL | A | 389 | 23.709 | 32.920 | 10.201 | 1.00 | 0.00 |
| ATOM | 5665 | 2HG1 | VAL | A | 389 | 23.623 | 34.681 | 9.964  | 1.00 | 0.00 |
| ATOM | 5666 | 3HG1 | VAL | A | 389 | 24.795 | 33.993 | 11.114 | 1.00 | 0.00 |

PEDF\_P1\_final\_docking\_model.txt

|      |      |      |     |   |     |        |        |        |      |      |
|------|------|------|-----|---|-----|--------|--------|--------|------|------|
| ATOM | 5667 | 1HG2 | VAL | A | 389 | 22.869 | 31.898 | 12.283 | 1.00 | 0.00 |
| ATOM | 5668 | 2HG2 | VAL | A | 389 | 23.925 | 32.935 | 13.271 | 1.00 | 0.00 |
| ATOM | 5669 | 3HG2 | VAL | A | 389 | 22.170 | 32.912 | 13.567 | 1.00 | 0.00 |
| ATOM | 5670 | N    | LEU | A | 390 | 23.645 | 37.363 | 11.436 | 1.00 | 0.00 |
| ATOM | 5671 | CA   | LEU | A | 390 | 23.608 | 38.487 | 10.502 | 1.00 | 0.00 |
| ATOM | 5672 | C    | LEU | A | 390 | 24.131 | 37.931 | 9.186  | 1.00 | 0.00 |
| ATOM | 5673 | O    | LEU | A | 390 | 25.302 | 37.592 | 9.080  | 1.00 | 0.00 |
| ATOM | 5674 | CB   | LEU | A | 390 | 24.450 | 39.671 | 10.994 | 1.00 | 0.00 |
| ATOM | 5675 | CG   | LEU | A | 390 | 24.626 | 40.812 | 9.985  | 1.00 | 0.00 |
| ATOM | 5676 | CD1  | LEU | A | 390 | 23.306 | 41.547 | 9.793  | 1.00 | 0.00 |
| ATOM | 5677 | CD2  | LEU | A | 390 | 25.706 | 41.764 | 10.475 | 1.00 | 0.00 |
| ATOM | 5678 | H    | LEU | A | 390 | 24.440 | 37.259 | 12.050 | 1.00 | 0.00 |
| ATOM | 5679 | HA   | LEU | A | 390 | 22.581 | 38.830 | 10.384 | 1.00 | 0.00 |
| ATOM | 5680 | 1HB  | LEU | A | 390 | 23.827 | 39.998 | 11.825 | 1.00 | 0.00 |
| ATOM | 5681 | 2HB  | LEU | A | 390 | 25.419 | 39.346 | 11.374 | 1.00 | 0.00 |
| ATOM | 5682 | HG   | LEU | A | 390 | 24.971 | 40.368 | 9.051  | 1.00 | 0.00 |
| ATOM | 5683 | 1HD1 | LEU | A | 390 | 23.440 | 42.355 | 9.075  | 1.00 | 0.00 |
| ATOM | 5684 | 2HD1 | LEU | A | 390 | 22.553 | 40.852 | 9.420  | 1.00 | 0.00 |
| ATOM | 5685 | 3HD1 | LEU | A | 390 | 22.978 | 41.960 | 10.746 | 1.00 | 0.00 |
| ATOM | 5686 | 1HD2 | LEU | A | 390 | 25.830 | 42.574 | 9.756  | 1.00 | 0.00 |
| ATOM | 5687 | 2HD2 | LEU | A | 390 | 25.417 | 42.176 | 11.442 | 1.00 | 0.00 |
| ATOM | 5688 | 3HD2 | LEU | A | 390 | 26.648 | 41.224 | 10.578 | 1.00 | 0.00 |
| ATOM | 5689 | N    | ARG | A | 391 | 23.268 | 37.836 | 8.184  | 1.00 | 0.00 |
| ATOM | 5690 | CA   | ARG | A | 391 | 23.677 | 37.275 | 6.904  | 1.00 | 0.00 |
| ATOM | 5691 | C    | ARG | A | 391 | 23.539 | 38.258 | 5.748  | 1.00 | 0.00 |
| ATOM | 5692 | O    | ARG | A | 391 | 22.683 | 39.146 | 5.778  | 1.00 | 0.00 |
| ATOM | 5693 | CB   | ARG | A | 391 | 22.944 | 35.976 | 6.605  | 1.00 | 0.00 |
| ATOM | 5694 | CG   | ARG | A | 391 | 21.432 | 36.100 | 6.516  | 1.00 | 0.00 |
| ATOM | 5695 | CD   | ARG | A | 391 | 20.746 | 34.885 | 6.006  | 1.00 | 0.00 |
| ATOM | 5696 | NE   | ARG | A | 391 | 20.912 | 34.653 | 4.580  | 1.00 | 0.00 |
| ATOM | 5697 | CZ   | ARG | A | 391 | 20.129 | 35.187 | 3.622  | 1.00 | 0.00 |
| ATOM | 5698 | NH1  | ARG | A | 391 | 19.105 | 35.950 | 3.932  | 1.00 | 0.00 |
| ATOM | 5699 | NH2  | ARG | A | 391 | 20.403 | 34.902 | 2.361  | 1.00 | 0.00 |
| ATOM | 5700 | H    | ARG | A | 391 | 22.316 | 38.153 | 8.301  | 1.00 | 0.00 |
| ATOM | 5701 | HA   | ARG | A | 391 | 24.736 | 37.016 | 6.936  | 1.00 | 0.00 |
| ATOM | 5702 | 1HB  | ARG | A | 391 | 23.331 | 35.604 | 5.657  | 1.00 | 0.00 |
| ATOM | 5703 | 2HB  | ARG | A | 391 | 23.200 | 35.276 | 7.400  | 1.00 | 0.00 |
| ATOM | 5704 | 1HG  | ARG | A | 391 | 21.042 | 36.312 | 7.511  | 1.00 | 0.00 |
| ATOM | 5705 | 2HG  | ARG | A | 391 | 21.191 | 36.928 | 5.847  | 1.00 | 0.00 |
| ATOM | 5706 | 1HD  | ARG | A | 391 | 21.139 | 34.012 | 6.526  | 1.00 | 0.00 |
| ATOM | 5707 | 2HD  | ARG | A | 391 | 19.678 | 34.973 | 6.201  | 1.00 | 0.00 |
| ATOM | 5708 | HE   | ARG | A | 391 | 21.597 | 34.090 | 4.094  | 1.00 | 0.00 |
| ATOM | 5709 | 1HH1 | ARG | A | 391 | 18.897 | 36.144 | 4.901  | 1.00 | 0.00 |
| ATOM | 5710 | 2HH1 | ARG | A | 391 | 18.530 | 36.340 | 3.199  | 1.00 | 0.00 |
| ATOM | 5711 | 1HH2 | ARG | A | 391 | 21.184 | 34.298 | 2.141  | 1.00 | 0.00 |
| ATOM | 5712 | 2HH2 | ARG | A | 391 | 19.832 | 35.288 | 1.624  | 1.00 | 0.00 |
| ATOM | 5713 | N    | ASP | A | 392 | 24.396 | 38.108 | 4.738  | 1.00 | 0.00 |
| ATOM | 5714 | CA   | ASP | A | 392 | 24.325 | 38.956 | 3.549  | 1.00 | 0.00 |
| ATOM | 5715 | C    | ASP | A | 392 | 23.362 | 38.256 | 2.601  | 1.00 | 0.00 |
| ATOM | 5716 | O    | ASP | A | 392 | 23.558 | 37.085 | 2.276  | 1.00 | 0.00 |
| ATOM | 5717 | CB   | ASP | A | 392 | 25.657 | 39.061 | 2.837  | 1.00 | 0.00 |
| ATOM | 5718 | CG   | ASP | A | 392 | 25.305 | 39.854 | 1.616  | 1.00 | 0.00 |
| ATOM | 5719 | OD1  | ASP | A | 392 | 25.690 | 39.484 | 0.516  | 1.00 | 0.00 |
| ATOM | 5720 | OD2  | ASP | A | 392 | 24.571 | 40.816 | 1.779  | 1.00 | 0.00 |
| ATOM | 5721 | H    | ASP | A | 392 | 25.110 | 37.395 | 4.792  | 1.00 | 0.00 |
| ATOM | 5722 | HA   | ASP | A | 392 | 23.936 | 39.938 | 3.819  | 1.00 | 0.00 |
| ATOM | 5723 | 1HB  | ASP | A | 392 | 26.455 | 39.458 | 3.465  | 1.00 | 0.00 |
| ATOM | 5724 | 2HB  | ASP | A | 392 | 25.847 | 38.007 | 2.630  | 1.00 | 0.00 |
| ATOM | 5725 | N    | THR | A | 393 | 22.325 | 38.969 | 2.170  | 1.00 | 0.00 |
| ATOM | 5726 | CA   | THR | A | 393 | 21.308 | 38.403 | 1.280  | 1.00 | 0.00 |
| ATOM | 5727 | C    | THR | A | 393 | 21.779 | 38.003 | -0.117 | 1.00 | 0.00 |
| ATOM | 5728 | O    | THR | A | 393 | 21.348 | 36.978 | -0.647 | 1.00 | 0.00 |
| ATOM | 5729 | CB   | THR | A | 393 | 20.139 | 39.392 | 1.115  | 1.00 | 0.00 |

PEDF\_P1\_final\_docking\_model.txt

|      |      |      |     |   |     |        |        |        |      |      |
|------|------|------|-----|---|-----|--------|--------|--------|------|------|
| ATOM | 5730 | OG1  | THR | A | 393 | 19.525 | 39.626 | 2.389  | 1.00 | 0.00 |
| ATOM | 5731 | CG2  | THR | A | 393 | 19.102 | 38.835 | 0.151  | 1.00 | 0.00 |
| ATOM | 5732 | H    | THR | A | 393 | 22.239 | 39.930 | 2.467  | 1.00 | 0.00 |
| ATOM | 5733 | HA   | THR | A | 393 | 20.935 | 37.467 | 1.695  | 1.00 | 0.00 |
| ATOM | 5734 | HB   | THR | A | 393 | 20.524 | 40.335 | 0.728  | 1.00 | 0.00 |
| ATOM | 5735 | HG1  | THR | A | 393 | 18.796 | 40.243 | 2.283  | 1.00 | 0.00 |
| ATOM | 5736 | 1HG2 | THR | A | 393 | 18.284 | 39.548 | 0.047  | 1.00 | 0.00 |
| ATOM | 5737 | 2HG2 | THR | A | 393 | 19.564 | 38.667 | -0.822 | 1.00 | 0.00 |
| ATOM | 5738 | 3HG2 | THR | A | 393 | 18.716 | 37.893 | 0.538  | 1.00 | 0.00 |
| ATOM | 5739 | N    | ASP | A | 394 | 22.648 | 38.815 | -0.714 | 1.00 | 0.00 |
| ATOM | 5740 | CA   | ASP | A | 394 | 23.143 | 38.555 | -2.063 | 1.00 | 0.00 |
| ATOM | 5741 | C    | ASP | A | 394 | 24.010 | 37.310 | -2.188 | 1.00 | 0.00 |
| ATOM | 5742 | O    | ASP | A | 394 | 23.723 | 36.420 | -2.994 | 1.00 | 0.00 |
| ATOM | 5743 | CB   | ASP | A | 394 | 23.930 | 39.769 | -2.565 | 1.00 | 0.00 |
| ATOM | 5744 | CG   | ASP | A | 394 | 23.072 | 40.985 | -2.885 | 1.00 | 0.00 |
| ATOM | 5745 | OD1  | ASP | A | 394 | 21.873 | 40.846 | -2.933 | 1.00 | 0.00 |
| ATOM | 5746 | OD2  | ASP | A | 394 | 23.605 | 42.069 | -2.924 | 1.00 | 0.00 |
| ATOM | 5747 | H    | ASP | A | 394 | 22.974 | 39.633 | -0.220 | 1.00 | 0.00 |
| ATOM | 5748 | HA   | ASP | A | 394 | 22.304 | 38.372 | -2.735 | 1.00 | 0.00 |
| ATOM | 5749 | 1HB  | ASP | A | 394 | 24.743 | 40.063 | -1.902 | 1.00 | 0.00 |
| ATOM | 5750 | 2HB  | ASP | A | 394 | 24.341 | 39.361 | -3.488 | 1.00 | 0.00 |
| ATOM | 5751 | N    | THR | A | 395 | 25.078 | 37.263 | -1.397 | 1.00 | 0.00 |
| ATOM | 5752 | CA   | THR | A | 395 | 26.011 | 36.146 | -1.411 | 1.00 | 0.00 |
| ATOM | 5753 | C    | THR | A | 395 | 25.610 | 35.069 | -0.412 | 1.00 | 0.00 |
| ATOM | 5754 | O    | THR | A | 395 | 25.933 | 33.901 | -0.590 | 1.00 | 0.00 |
| ATOM | 5755 | CB   | THR | A | 395 | 27.446 | 36.609 | -1.100 | 1.00 | 0.00 |
| ATOM | 5756 | OG1  | THR | A | 395 | 27.489 | 37.195 | 0.208  | 1.00 | 0.00 |
| ATOM | 5757 | CG2  | THR | A | 395 | 27.911 | 37.632 | -2.125 | 1.00 | 0.00 |
| ATOM | 5758 | H    | THR | A | 395 | 25.243 | 38.034 | -0.765 | 1.00 | 0.00 |
| ATOM | 5759 | HA   | THR | A | 395 | 26.001 | 35.669 | -2.392 | 1.00 | 0.00 |
| ATOM | 5760 | HB   | THR | A | 395 | 28.110 | 35.745 | -1.123 | 1.00 | 0.00 |
| ATOM | 5761 | HG1  | THR | A | 395 | 26.896 | 37.950 | 0.239  | 1.00 | 0.00 |
| ATOM | 5762 | 1HG2 | THR | A | 395 | 28.927 | 37.947 | -1.889 | 1.00 | 0.00 |
| ATOM | 5763 | 2HG2 | THR | A | 395 | 27.890 | 37.185 | -3.119 | 1.00 | 0.00 |
| ATOM | 5764 | 3HG2 | THR | A | 395 | 27.248 | 38.496 | -2.102 | 1.00 | 0.00 |
| ATOM | 5765 | N    | GLY | A | 396 | 24.907 | 35.472 | 0.641  | 1.00 | 0.00 |
| ATOM | 5766 | CA   | GLY | A | 396 | 24.486 | 34.532 | 1.661  | 1.00 | 0.00 |
| ATOM | 5767 | C    | GLY | A | 396 | 25.570 | 34.338 | 2.701  | 1.00 | 0.00 |
| ATOM | 5768 | O    | GLY | A | 396 | 25.484 | 33.449 | 3.539  | 1.00 | 0.00 |
| ATOM | 5769 | H    | GLY | A | 396 | 24.659 | 36.446 | 0.738  | 1.00 | 0.00 |
| ATOM | 5770 | 1HA  | GLY | A | 396 | 23.588 | 34.913 | 2.148  | 1.00 | 0.00 |
| ATOM | 5771 | 2HA  | GLY | A | 396 | 24.265 | 33.574 | 1.193  | 1.00 | 0.00 |
| ATOM | 5772 | N    | ALA | A | 397 | 26.592 | 35.184 | 2.649  | 1.00 | 0.00 |
| ATOM | 5773 | CA   | ALA | A | 397 | 27.723 | 35.114 | 3.571  | 1.00 | 0.00 |
| ATOM | 5774 | C    | ALA | A | 397 | 27.394 | 35.471 | 5.020  | 1.00 | 0.00 |
| ATOM | 5775 | O    | ALA | A | 397 | 26.643 | 36.408 | 5.297  | 1.00 | 0.00 |
| ATOM | 5776 | CB   | ALA | A | 397 | 28.859 | 36.020 | 3.094  | 1.00 | 0.00 |
| ATOM | 5777 | H    | ALA | A | 397 | 26.579 | 35.903 | 1.940  | 1.00 | 0.00 |
| ATOM | 5778 | HA   | ALA | A | 397 | 28.081 | 34.085 | 3.607  | 1.00 | 0.00 |
| ATOM | 5779 | 1HB  | ALA | A | 397 | 29.693 | 35.955 | 3.793  | 1.00 | 0.00 |
| ATOM | 5780 | 2HB  | ALA | A | 397 | 29.189 | 35.701 | 2.105  | 1.00 | 0.00 |
| ATOM | 5781 | 3HB  | ALA | A | 397 | 28.507 | 37.049 | 3.045  | 1.00 | 0.00 |
| ATOM | 5782 | N    | LEU | A | 398 | 27.974 | 34.706 | 5.938  | 1.00 | 0.00 |
| ATOM | 5783 | CA   | LEU | A | 398 | 27.795 | 34.906 | 7.375  | 1.00 | 0.00 |
| ATOM | 5784 | C    | LEU | A | 398 | 28.645 | 36.112 | 7.760  | 1.00 | 0.00 |
| ATOM | 5785 | O    | LEU | A | 398 | 29.867 | 36.038 | 7.735  | 1.00 | 0.00 |
| ATOM | 5786 | CB   | LEU | A | 398 | 28.328 | 33.666 | 8.099  | 1.00 | 0.00 |
| ATOM | 5787 | CG   | LEU | A | 398 | 27.811 | 33.305 | 9.497  | 1.00 | 0.00 |
| ATOM | 5788 | CD1  | LEU | A | 398 | 28.725 | 32.257 | 10.133 | 1.00 | 0.00 |
| ATOM | 5789 | CD2  | LEU | A | 398 | 27.626 | 34.492 | 10.436 | 1.00 | 0.00 |
| ATOM | 5790 | H    | LEU | A | 398 | 28.565 | 33.953 | 5.616  | 1.00 | 0.00 |
| ATOM | 5791 | HA   | LEU | A | 398 | 26.748 | 35.122 | 7.586  | 1.00 | 0.00 |
| ATOM | 5792 | 1HB  | LEU | A | 398 | 27.993 | 32.898 | 7.404  | 1.00 | 0.00 |

PEDF\_P1\_final\_docking\_model.txt

|      |      |      |     |   |     |        |        |        |      |      |
|------|------|------|-----|---|-----|--------|--------|--------|------|------|
| ATOM | 5793 | 2HB  | LEU | A | 398 | 29.417 | 33.663 | 8.146  | 1.00 | 0.00 |
| ATOM | 5794 | HG   | LEU | A | 398 | 26.817 | 32.875 | 9.374  | 1.00 | 0.00 |
| ATOM | 5795 | 1HD1 | LEU | A | 398 | 28.353 | 32.004 | 11.126 | 1.00 | 0.00 |
| ATOM | 5796 | 2HD1 | LEU | A | 398 | 28.738 | 31.361 | 9.512  | 1.00 | 0.00 |
| ATOM | 5797 | 3HD1 | LEU | A | 398 | 29.735 | 32.657 | 10.215 | 1.00 | 0.00 |
| ATOM | 5798 | 1HD2 | LEU | A | 398 | 27.257 | 34.139 | 11.399 | 1.00 | 0.00 |
| ATOM | 5799 | 2HD2 | LEU | A | 398 | 28.581 | 34.998 | 10.576 | 1.00 | 0.00 |
| ATOM | 5800 | 3HD2 | LEU | A | 398 | 26.906 | 35.188 | 10.006 | 1.00 | 0.00 |
| ATOM | 5801 | N    | LEU | A | 399 | 28.015 | 37.221 | 8.120  | 1.00 | 0.00 |
| ATOM | 5802 | CA   | LEU | A | 399 | 28.775 | 38.415 | 8.481  | 1.00 | 0.00 |
| ATOM | 5803 | C    | LEU | A | 399 | 28.966 | 38.567 | 9.982  | 1.00 | 0.00 |
| ATOM | 5804 | O    | LEU | A | 399 | 29.938 | 39.184 | 10.431 | 1.00 | 0.00 |
| ATOM | 5805 | CB   | LEU | A | 399 | 28.071 | 39.658 | 7.943  | 1.00 | 0.00 |
| ATOM | 5806 | CG   | LEU | A | 399 | 27.660 | 39.570 | 6.473  | 1.00 | 0.00 |
| ATOM | 5807 | CD1  | LEU | A | 399 | 26.884 | 40.818 | 6.050  | 1.00 | 0.00 |
| ATOM | 5808 | CD2  | LEU | A | 399 | 28.841 | 39.286 | 5.543  | 1.00 | 0.00 |
| ATOM | 5809 | H    | LEU | A | 399 | 27.006 | 37.253 | 8.149  | 1.00 | 0.00 |
| ATOM | 5810 | HA   | LEU | A | 399 | 29.780 | 38.347 | 8.067  | 1.00 | 0.00 |
| ATOM | 5811 | 1HB  | LEU | A | 399 | 27.190 | 39.653 | 8.582  | 1.00 | 0.00 |
| ATOM | 5812 | 2HB  | LEU | A | 399 | 28.650 | 40.562 | 8.130  | 1.00 | 0.00 |
| ATOM | 5813 | HG   | LEU | A | 399 | 26.983 | 38.721 | 6.376  | 1.00 | 0.00 |
| ATOM | 5814 | 1HD1 | LEU | A | 399 | 26.602 | 40.733 | 5.001  | 1.00 | 0.00 |
| ATOM | 5815 | 2HD1 | LEU | A | 399 | 25.985 | 40.912 | 6.660  | 1.00 | 0.00 |
| ATOM | 5816 | 3HD1 | LEU | A | 399 | 27.510 | 41.699 | 6.187  | 1.00 | 0.00 |
| ATOM | 5817 | 1HD2 | LEU | A | 399 | 28.488 | 39.234 | 4.513  | 1.00 | 0.00 |
| ATOM | 5818 | 2HD2 | LEU | A | 399 | 29.577 | 40.085 | 5.635  | 1.00 | 0.00 |
| ATOM | 5819 | 3HD2 | LEU | A | 399 | 29.300 | 38.336 | 5.817  | 1.00 | 0.00 |
| ATOM | 5820 | N    | PHE | A | 400 | 28.052 | 38.006 | 10.762 | 1.00 | 0.00 |
| ATOM | 5821 | CA   | PHE | A | 400 | 28.149 | 38.124 | 12.206 | 1.00 | 0.00 |
| ATOM | 5822 | C    | PHE | A | 400 | 27.285 | 37.075 | 12.867 | 1.00 | 0.00 |
| ATOM | 5823 | O    | PHE | A | 400 | 26.209 | 36.744 | 12.380 | 1.00 | 0.00 |
| ATOM | 5824 | CB   | PHE | A | 400 | 27.673 | 39.498 | 12.685 | 1.00 | 0.00 |
| ATOM | 5825 | CG   | PHE | A | 400 | 28.785 | 40.321 | 13.290 | 1.00 | 0.00 |
| ATOM | 5826 | CD1  | PHE | A | 400 | 29.285 | 40.003 | 14.547 | 1.00 | 0.00 |
| ATOM | 5827 | CD2  | PHE | A | 400 | 29.286 | 41.420 | 12.602 | 1.00 | 0.00 |
| ATOM | 5828 | CE1  | PHE | A | 400 | 30.257 | 40.808 | 15.129 | 1.00 | 0.00 |
| ATOM | 5829 | CE2  | PHE | A | 400 | 30.258 | 42.225 | 13.185 | 1.00 | 0.00 |
| ATOM | 5830 | CZ   | PHE | A | 400 | 30.730 | 41.930 | 14.458 | 1.00 | 0.00 |
| ATOM | 5831 | H    | PHE | A | 400 | 27.281 | 37.492 | 10.361 | 1.00 | 0.00 |
| ATOM | 5832 | HA   | PHE | A | 400 | 29.177 | 37.947 | 12.524 | 1.00 | 0.00 |
| ATOM | 5833 | 1HB  | PHE | A | 400 | 27.269 | 40.068 | 11.849 | 1.00 | 0.00 |
| ATOM | 5834 | 2HB  | PHE | A | 400 | 26.906 | 39.383 | 13.449 | 1.00 | 0.00 |
| ATOM | 5835 | HD1  | PHE | A | 400 | 28.906 | 39.120 | 15.063 | 1.00 | 0.00 |
| ATOM | 5836 | HD2  | PHE | A | 400 | 28.915 | 41.651 | 11.603 | 1.00 | 0.00 |
| ATOM | 5837 | HE1  | PHE | A | 400 | 30.651 | 40.560 | 16.114 | 1.00 | 0.00 |
| ATOM | 5838 | HE2  | PHE | A | 400 | 30.650 | 43.087 | 12.646 | 1.00 | 0.00 |
| ATOM | 5839 | HZ   | PHE | A | 400 | 31.468 | 42.577 | 14.930 | 1.00 | 0.00 |
| ATOM | 5840 | N    | ILE | A | 401 | 27.755 | 36.535 | 13.975 | 1.00 | 0.00 |
| ATOM | 5841 | CA   | ILE | A | 401 | 26.963 | 35.556 | 14.685 | 1.00 | 0.00 |
| ATOM | 5842 | C    | ILE | A | 401 | 27.111 | 35.789 | 16.177 | 1.00 | 0.00 |
| ATOM | 5843 | O    | ILE | A | 401 | 28.173 | 36.198 | 16.656 | 1.00 | 0.00 |
| ATOM | 5844 | CB   | ILE | A | 401 | 27.379 | 34.115 | 14.339 | 1.00 | 0.00 |
| ATOM | 5845 | CG1  | ILE | A | 401 | 26.415 | 33.112 | 14.979 | 1.00 | 0.00 |
| ATOM | 5846 | CG2  | ILE | A | 401 | 28.806 | 33.850 | 14.793 | 1.00 | 0.00 |
| ATOM | 5847 | CD1  | ILE | A | 401 | 26.565 | 31.702 | 14.456 | 1.00 | 0.00 |
| ATOM | 5848 | H    | ILE | A | 401 | 28.661 | 36.793 | 14.339 | 1.00 | 0.00 |
| ATOM | 5849 | HA   | ILE | A | 401 | 25.904 | 35.685 | 14.464 | 1.00 | 0.00 |
| ATOM | 5850 | HB   | ILE | A | 401 | 27.309 | 33.974 | 13.261 | 1.00 | 0.00 |
| ATOM | 5851 | 1HG1 | ILE | A | 401 | 26.600 | 33.124 | 16.052 | 1.00 | 0.00 |
| ATOM | 5852 | 2HG1 | ILE | A | 401 | 25.403 | 33.466 | 14.782 | 1.00 | 0.00 |
| ATOM | 5853 | 1HG2 | ILE | A | 401 | 29.084 | 32.826 | 14.542 | 1.00 | 0.00 |
| ATOM | 5854 | 2HG2 | ILE | A | 401 | 29.482 | 34.542 | 14.293 | 1.00 | 0.00 |
| ATOM | 5855 | 3HG2 | ILE | A | 401 | 28.877 | 33.989 | 15.872 | 1.00 | 0.00 |

PEDF\_P1\_final\_docking\_model.txt

|      |      |      |     |   |     |        |        |        |      |      |
|------|------|------|-----|---|-----|--------|--------|--------|------|------|
| ATOM | 5856 | 1HD1 | ILE | A | 401 | 25.849 | 31.049 | 14.956 | 1.00 | 0.00 |
| ATOM | 5857 | 2HD1 | ILE | A | 401 | 26.379 | 31.689 | 13.382 | 1.00 | 0.00 |
| ATOM | 5858 | 3HD1 | ILE | A | 401 | 27.576 | 31.346 | 14.653 | 1.00 | 0.00 |
| ATOM | 5859 | N    | GLY | A | 402 | 26.035 | 35.551 | 16.915 | 1.00 | 0.00 |
| ATOM | 5860 | CA   | GLY | A | 402 | 26.102 | 35.747 | 18.344 | 1.00 | 0.00 |
| ATOM | 5861 | C    | GLY | A | 402 | 25.144 | 34.907 | 19.166 | 1.00 | 0.00 |
| ATOM | 5862 | O    | GLY | A | 402 | 24.014 | 34.642 | 18.747 | 1.00 | 0.00 |
| ATOM | 5863 | H    | GLY | A | 402 | 25.169 | 35.236 | 16.502 | 1.00 | 0.00 |
| ATOM | 5864 | 1HA  | GLY | A | 402 | 27.107 | 35.506 | 18.690 | 1.00 | 0.00 |
| ATOM | 5865 | 2HA  | GLY | A | 402 | 25.881 | 36.789 | 18.571 | 1.00 | 0.00 |
| ATOM | 5866 | N    | LYS | A | 403 | 25.616 | 34.474 | 20.334 | 1.00 | 0.00 |
| ATOM | 5867 | CA   | LYS | A | 403 | 24.816 | 33.703 | 21.279 | 1.00 | 0.00 |
| ATOM | 5868 | C    | LYS | A | 403 | 24.583 | 34.713 | 22.395 | 1.00 | 0.00 |
| ATOM | 5869 | O    | LYS | A | 403 | 25.517 | 35.075 | 23.091 | 1.00 | 0.00 |
| ATOM | 5870 | CB   | LYS | A | 403 | 25.524 | 32.441 | 21.774 | 1.00 | 0.00 |
| ATOM | 5871 | CG   | LYS | A | 403 | 24.693 | 31.583 | 22.718 | 1.00 | 0.00 |
| ATOM | 5872 | CD   | LYS | A | 403 | 25.324 | 30.213 | 22.922 | 1.00 | 0.00 |
| ATOM | 5873 | CE   | LYS | A | 403 | 24.509 | 29.366 | 23.888 | 1.00 | 0.00 |
| ATOM | 5874 | NZ   | LYS | A | 403 | 25.133 | 28.035 | 24.122 | 1.00 | 0.00 |
| ATOM | 5875 | H    | LYS | A | 403 | 26.574 | 34.695 | 20.566 | 1.00 | 0.00 |
| ATOM | 5876 | HA   | LYS | A | 403 | 23.886 | 33.388 | 20.804 | 1.00 | 0.00 |
| ATOM | 5877 | 1HB  | LYS | A | 403 | 25.789 | 31.857 | 20.892 | 1.00 | 0.00 |
| ATOM | 5878 | 2HB  | LYS | A | 403 | 26.433 | 32.762 | 22.283 | 1.00 | 0.00 |
| ATOM | 5879 | 1HG  | LYS | A | 403 | 24.619 | 32.096 | 23.678 | 1.00 | 0.00 |
| ATOM | 5880 | 2HG  | LYS | A | 403 | 23.697 | 31.464 | 22.293 | 1.00 | 0.00 |
| ATOM | 5881 | 1HD  | LYS | A | 403 | 25.382 | 29.711 | 21.956 | 1.00 | 0.00 |
| ATOM | 5882 | 2HD  | LYS | A | 403 | 26.329 | 30.350 | 23.320 | 1.00 | 0.00 |
| ATOM | 5883 | 1HE  | LYS | A | 403 | 24.432 | 29.902 | 24.832 | 1.00 | 0.00 |
| ATOM | 5884 | 2HE  | LYS | A | 403 | 23.513 | 29.230 | 23.466 | 1.00 | 0.00 |
| ATOM | 5885 | 1HZ  | LYS | A | 403 | 24.562 | 27.505 | 24.766 | 1.00 | 0.00 |
| ATOM | 5886 | 2HZ  | LYS | A | 403 | 25.203 | 27.536 | 23.246 | 1.00 | 0.00 |
| ATOM | 5887 | 3HZ  | LYS | A | 403 | 26.055 | 28.160 | 24.514 | 1.00 | 0.00 |
| ATOM | 5888 | N    | ILE | A | 404 | 23.360 | 35.194 | 22.552 | 1.00 | 0.00 |
| ATOM | 5889 | CA   | ILE | A | 404 | 23.080 | 36.191 | 23.586 | 1.00 | 0.00 |
| ATOM | 5890 | C    | ILE | A | 404 | 22.460 | 35.577 | 24.845 | 1.00 | 0.00 |
| ATOM | 5891 | O    | ILE | A | 404 | 21.269 | 35.253 | 24.870 | 1.00 | 0.00 |
| ATOM | 5892 | CB   | ILE | A | 404 | 22.141 | 37.290 | 23.056 | 1.00 | 0.00 |
| ATOM | 5893 | CG1  | ILE | A | 404 | 22.714 | 37.912 | 21.780 | 1.00 | 0.00 |
| ATOM | 5894 | CG2  | ILE | A | 404 | 21.916 | 38.355 | 24.118 | 1.00 | 0.00 |
| ATOM | 5895 | CD1  | ILE | A | 404 | 24.077 | 38.539 | 21.966 | 1.00 | 0.00 |
| ATOM | 5896 | H    | ILE | A | 404 | 22.607 | 34.876 | 21.958 | 1.00 | 0.00 |
| ATOM | 5897 | HA   | ILE | A | 404 | 24.004 | 36.641 | 23.946 | 1.00 | 0.00 |
| ATOM | 5898 | HB   | ILE | A | 404 | 21.186 | 36.840 | 22.784 | 1.00 | 0.00 |
| ATOM | 5899 | 1HG1 | ILE | A | 404 | 22.776 | 37.122 | 21.033 | 1.00 | 0.00 |
| ATOM | 5900 | 2HG1 | ILE | A | 404 | 22.007 | 38.673 | 21.445 | 1.00 | 0.00 |
| ATOM | 5901 | 1HG2 | ILE | A | 404 | 21.250 | 39.124 | 23.726 | 1.00 | 0.00 |
| ATOM | 5902 | 2HG2 | ILE | A | 404 | 21.466 | 37.901 | 24.999 | 1.00 | 0.00 |
| ATOM | 5903 | 3HG2 | ILE | A | 404 | 22.870 | 38.806 | 24.389 | 1.00 | 0.00 |
| ATOM | 5904 | 1HD1 | ILE | A | 404 | 24.417 | 38.960 | 21.019 | 1.00 | 0.00 |
| ATOM | 5905 | 2HD1 | ILE | A | 404 | 24.015 | 39.331 | 22.713 | 1.00 | 0.00 |
| ATOM | 5906 | 3HD1 | ILE | A | 404 | 24.784 | 37.781 | 22.299 | 1.00 | 0.00 |
| ATOM | 5907 | N    | LEU | A | 405 | 23.281 | 35.414 | 25.882 | 1.00 | 0.00 |
| ATOM | 5908 | CA   | LEU | A | 405 | 22.831 | 34.862 | 27.161 | 1.00 | 0.00 |
| ATOM | 5909 | C    | LEU | A | 405 | 22.400 | 36.004 | 28.085 | 1.00 | 0.00 |
| ATOM | 5910 | O    | LEU | A | 405 | 21.588 | 35.808 | 28.985 | 1.00 | 0.00 |
| ATOM | 5911 | CB   | LEU | A | 405 | 23.940 | 34.024 | 27.810 | 1.00 | 0.00 |
| ATOM | 5912 | CG   | LEU | A | 405 | 24.381 | 32.792 | 27.010 | 1.00 | 0.00 |
| ATOM | 5913 | CD1  | LEU | A | 405 | 25.542 | 32.102 | 27.711 | 1.00 | 0.00 |
| ATOM | 5914 | CD2  | LEU | A | 405 | 23.204 | 31.841 | 26.851 | 1.00 | 0.00 |
| ATOM | 5915 | H    | LEU | A | 405 | 24.249 | 35.683 | 25.776 | 1.00 | 0.00 |
| ATOM | 5916 | HA   | LEU | A | 405 | 21.962 | 34.225 | 26.998 | 1.00 | 0.00 |
| ATOM | 5917 | 1HB  | LEU | A | 405 | 24.737 | 34.766 | 27.824 | 1.00 | 0.00 |
| ATOM | 5918 | 2HB  | LEU | A | 405 | 23.687 | 33.743 | 28.833 | 1.00 | 0.00 |

PEDF\_P1\_final\_docking\_model.txt

|      |      |      |     |   |     |        |        |        |      |      |
|------|------|------|-----|---|-----|--------|--------|--------|------|------|
| ATOM | 5919 | HG   | LEU | A | 405 | 24.666 | 33.137 | 26.016 | 1.00 | 0.00 |
| ATOM | 5920 | 1HD1 | LEU | A | 405 | 25.849 | 31.228 | 27.135 | 1.00 | 0.00 |
| ATOM | 5921 | 2HD1 | LEU | A | 405 | 26.381 | 32.793 | 27.793 | 1.00 | 0.00 |
| ATOM | 5922 | 3HD1 | LEU | A | 405 | 25.231 | 31.788 | 28.707 | 1.00 | 0.00 |
| ATOM | 5923 | 1HD2 | LEU | A | 405 | 23.518 | 30.966 | 26.281 | 1.00 | 0.00 |
| ATOM | 5924 | 2HD2 | LEU | A | 405 | 22.854 | 31.527 | 27.835 | 1.00 | 0.00 |
| ATOM | 5925 | 3HD2 | LEU | A | 405 | 22.395 | 32.346 | 26.323 | 1.00 | 0.00 |
| ATOM | 5926 | N    | ASP | A | 406 | 22.947 | 37.193 | 27.839 | 1.00 | 0.00 |
| ATOM | 5927 | CA   | ASP | A | 406 | 22.647 | 38.385 | 28.630 | 1.00 | 0.00 |
| ATOM | 5928 | C    | ASP | A | 406 | 22.751 | 39.636 | 27.748 | 1.00 | 0.00 |
| ATOM | 5929 | O    | ASP | A | 406 | 23.845 | 40.028 | 27.344 | 1.00 | 0.00 |
| ATOM | 5930 | CB   | ASP | A | 406 | 23.592 | 38.494 | 29.829 | 1.00 | 0.00 |
| ATOM | 5931 | CG   | ASP | A | 406 | 23.298 | 39.664 | 30.758 | 1.00 | 0.00 |
| ATOM | 5932 | OD1  | ASP | A | 406 | 22.454 | 40.462 | 30.427 | 1.00 | 0.00 |
| ATOM | 5933 | OD2  | ASP | A | 406 | 23.801 | 39.665 | 31.856 | 1.00 | 0.00 |
| ATOM | 5934 | H    | ASP | A | 406 | 23.597 | 37.264 | 27.069 | 1.00 | 0.00 |
| ATOM | 5935 | HA   | ASP | A | 406 | 21.623 | 38.334 | 29.001 | 1.00 | 0.00 |
| ATOM | 5936 | 1HB  | ASP | A | 406 | 23.661 | 37.575 | 30.413 | 1.00 | 0.00 |
| ATOM | 5937 | 2HB  | ASP | A | 406 | 24.537 | 38.669 | 29.313 | 1.00 | 0.00 |
| ATOM | 5938 | N    | PRO | A | 407 | 21.613 | 40.286 | 27.457 | 1.00 | 0.00 |
| ATOM | 5939 | CA   | PRO | A | 407 | 21.581 | 41.492 | 26.623 | 1.00 | 0.00 |
| ATOM | 5940 | C    | PRO | A | 407 | 22.489 | 42.590 | 27.168 | 1.00 | 0.00 |
| ATOM | 5941 | O    | PRO | A | 407 | 23.082 | 43.355 | 26.407 | 1.00 | 0.00 |
| ATOM | 5942 | CB   | PRO | A | 407 | 20.108 | 41.912 | 26.635 | 1.00 | 0.00 |
| ATOM | 5943 | CG   | PRO | A | 407 | 19.361 | 40.641 | 26.851 | 1.00 | 0.00 |
| ATOM | 5944 | CD   | PRO | A | 407 | 20.197 | 39.846 | 27.819 | 1.00 | 0.00 |
| ATOM | 5945 | HA   | PRO | A | 407 | 21.949 | 41.313 | 25.602 | 1.00 | 0.00 |
| ATOM | 5946 | 1HB  | PRO | A | 407 | 19.902 | 42.636 | 27.437 | 1.00 | 0.00 |
| ATOM | 5947 | 2HB  | PRO | A | 407 | 19.817 | 42.389 | 25.688 | 1.00 | 0.00 |
| ATOM | 5948 | 1HG  | PRO | A | 407 | 18.358 | 40.833 | 27.261 | 1.00 | 0.00 |
| ATOM | 5949 | 2HG  | PRO | A | 407 | 19.223 | 40.095 | 25.906 | 1.00 | 0.00 |
| ATOM | 5950 | 1HD  | PRO | A | 407 | 19.947 | 40.070 | 28.866 | 1.00 | 0.00 |
| ATOM | 5951 | 2HD  | PRO | A | 407 | 20.071 | 38.761 | 27.683 | 1.00 | 0.00 |
| ATOM | 5952 | N    | ARG | A | 408 | 22.578 | 42.659 | 28.494 | 1.00 | 0.00 |
| ATOM | 5953 | CA   | ARG | A | 408 | 23.377 | 43.669 | 29.171 | 1.00 | 0.00 |
| ATOM | 5954 | C    | ARG | A | 408 | 24.826 | 43.673 | 28.721 | 1.00 | 0.00 |
| ATOM | 5955 | O    | ARG | A | 408 | 25.599 | 44.549 | 29.091 | 1.00 | 0.00 |
| ATOM | 5956 | CB   | ARG | A | 408 | 23.277 | 43.544 | 30.684 | 1.00 | 0.00 |
| ATOM | 5957 | CG   | ARG | A | 408 | 21.909 | 43.869 | 31.264 | 1.00 | 0.00 |
| ATOM | 5958 | CD   | ARG | A | 408 | 21.813 | 43.703 | 32.737 | 1.00 | 0.00 |
| ATOM | 5959 | NE   | ARG | A | 408 | 22.619 | 44.641 | 33.503 | 1.00 | 0.00 |
| ATOM | 5960 | CZ   | ARG | A | 408 | 22.881 | 44.527 | 34.819 | 1.00 | 0.00 |
| ATOM | 5961 | NH1  | ARG | A | 408 | 22.376 | 43.541 | 35.527 | 1.00 | 0.00 |
| ATOM | 5962 | NH2  | ARG | A | 408 | 23.642 | 45.446 | 35.386 | 1.00 | 0.00 |
| ATOM | 5963 | H    | ARG | A | 408 | 22.070 | 41.983 | 29.046 | 1.00 | 0.00 |
| ATOM | 5964 | HA   | ARG | A | 408 | 22.995 | 44.662 | 28.933 | 1.00 | 0.00 |
| ATOM | 5965 | 1HB  | ARG | A | 408 | 23.540 | 42.518 | 30.937 | 1.00 | 0.00 |
| ATOM | 5966 | 2HB  | ARG | A | 408 | 24.017 | 44.223 | 31.109 | 1.00 | 0.00 |
| ATOM | 5967 | 1HG  | ARG | A | 408 | 21.669 | 44.906 | 31.026 | 1.00 | 0.00 |
| ATOM | 5968 | 2HG  | ARG | A | 408 | 21.173 | 43.211 | 30.802 | 1.00 | 0.00 |
| ATOM | 5969 | 1HD  | ARG | A | 408 | 20.776 | 43.839 | 33.041 | 1.00 | 0.00 |
| ATOM | 5970 | 2HD  | ARG | A | 408 | 22.141 | 42.699 | 33.002 | 1.00 | 0.00 |
| ATOM | 5971 | HE   | ARG | A | 408 | 23.089 | 45.483 | 33.200 | 1.00 | 0.00 |
| ATOM | 5972 | 1HH1 | ARG | A | 408 | 21.781 | 42.856 | 35.083 | 1.00 | 0.00 |
| ATOM | 5973 | 2HH1 | ARG | A | 408 | 22.584 | 43.473 | 36.513 | 1.00 | 0.00 |
| ATOM | 5974 | 1HH2 | ARG | A | 408 | 24.008 | 46.208 | 34.830 | 1.00 | 0.00 |
| ATOM | 5975 | 2HH2 | ARG | A | 408 | 23.854 | 45.385 | 36.371 | 1.00 | 0.00 |
| ATOM | 5976 | N    | GLY | A | 409 | 25.201 | 42.694 | 27.915 | 1.00 | 0.00 |
| ATOM | 5977 | CA   | GLY | A | 409 | 26.567 | 42.655 | 27.442 | 1.00 | 0.00 |
| ATOM | 5978 | C    | GLY | A | 409 | 27.508 | 42.124 | 28.498 | 1.00 | 0.00 |
| ATOM | 5979 | O    | GLY | A | 409 | 27.117 | 41.960 | 29.654 | 1.00 | 0.00 |
| ATOM | 5980 | H    | GLY | A | 409 | 24.558 | 41.973 | 27.621 | 1.00 | 0.00 |
| ATOM | 5981 | 1HA  | GLY | A | 409 | 26.622 | 42.009 | 26.566 | 1.00 | 0.00 |

PEDF\_P1\_final\_docking\_model.txt

|      |      |      |     |   |     |        |        |        |      |      |
|------|------|------|-----|---|-----|--------|--------|--------|------|------|
| ATOM | 5982 | 2HA  | GLY | A | 409 | 26.878 | 43.663 | 27.169 | 1.00 | 0.00 |
| ATOM | 5983 | N    | PRO | A | 410 | 28.766 | 41.846 | 28.121 | 1.00 | 0.00 |
| ATOM | 5984 | CA   | PRO | A | 410 | 29.793 | 41.324 | 29.025 | 1.00 | 0.00 |
| ATOM | 5985 | C    | PRO | A | 410 | 29.915 | 42.122 | 30.327 | 1.00 | 0.00 |
| ATOM | 5986 | O    | PRO | A | 410 | 29.736 | 43.342 | 30.348 | 1.00 | 0.00 |
| ATOM | 5987 | OXT  | PRO | A | 410 | 30.189 | 41.560 | 31.351 | 1.00 | 0.00 |
| ATOM | 5988 | CB   | PRO | A | 410 | 31.058 | 41.371 | 28.160 | 1.00 | 0.00 |
| ATOM | 5989 | CG   | PRO | A | 410 | 30.557 | 41.243 | 26.723 | 1.00 | 0.00 |
| ATOM | 5990 | CD   | PRO | A | 410 | 29.253 | 42.029 | 26.760 | 1.00 | 0.00 |
| ATOM | 5991 | HA   | PRO | A | 410 | 29.579 | 40.301 | 29.367 | 1.00 | 0.00 |
| ATOM | 5992 | 1HB  | PRO | A | 410 | 31.609 | 42.312 | 28.303 | 1.00 | 0.00 |
| ATOM | 5993 | 2HB  | PRO | A | 410 | 31.748 | 40.552 | 28.411 | 1.00 | 0.00 |
| ATOM | 5994 | 1HG  | PRO | A | 410 | 31.282 | 41.662 | 26.010 | 1.00 | 0.00 |
| ATOM | 5995 | 2HG  | PRO | A | 410 | 30.407 | 40.189 | 26.447 | 1.00 | 0.00 |
| ATOM | 5996 | 1HD  | PRO | A | 410 | 29.404 | 43.096 | 26.542 | 1.00 | 0.00 |
| ATOM | 5997 | 2HD  | PRO | A | 410 | 28.520 | 41.653 | 26.031 | 1.00 | 0.00 |
| TER  |      |      |     |   |     |        |        |        |      |      |
| ATOM | 5998 | N    | THR | B | 210 | 37.066 | 7.904  | -5.395 | 1.00 | 0.00 |
| ATOM | 5999 | CA   | THR | B | 210 | 38.372 | 8.458  | -5.740 | 1.00 | 0.00 |
| ATOM | 6000 | C    | THR | B | 210 | 38.705 | 9.732  | -4.983 | 1.00 | 0.00 |
| ATOM | 6001 | O    | THR | B | 210 | 39.297 | 10.669 | -5.509 | 1.00 | 0.00 |
| ATOM | 6002 | CB   | THR | B | 210 | 38.466 | 8.750  | -7.250 | 1.00 | 0.00 |
| ATOM | 6003 | OG1  | THR | B | 210 | 37.390 | 9.613  | -7.639 | 1.00 | 0.00 |
| ATOM | 6004 | CG2  | THR | B | 210 | 38.389 | 7.458  | -8.048 | 1.00 | 0.00 |
| ATOM | 6005 | 1H   | THR | B | 210 | 36.366 | 7.796  | -6.101 | 1.00 | 0.00 |
| ATOM | 6006 | 2H   | THR | B | 210 | 37.000 | 6.983  | -5.011 | 1.00 | 0.00 |
| ATOM | 6007 | 3H   | THR | B | 210 | 36.491 | 8.363  | -4.718 | 1.00 | 0.00 |
| ATOM | 6008 | HA   | THR | B | 210 | 39.156 | 7.752  | -5.467 | 1.00 | 0.00 |
| ATOM | 6009 | HB   | THR | B | 210 | 39.413 | 9.248  | -7.456 | 1.00 | 0.00 |
| ATOM | 6010 | HG1  | THR | B | 210 | 36.551 | 9.186  | -7.448 | 1.00 | 0.00 |
| ATOM | 6011 | 1HG2 | THR | B | 210 | 38.457 | 7.685  | -9.112 | 1.00 | 0.00 |
| ATOM | 6012 | 2HG2 | THR | B | 210 | 39.212 | 6.805  | -7.762 | 1.00 | 0.00 |
| ATOM | 6013 | 3HG2 | THR | B | 210 | 37.442 | 6.960  | -7.843 | 1.00 | 0.00 |
| ATOM | 6014 | N    | SER | B | 211 | 38.298 | 9.712  | -3.703 | 1.00 | 0.00 |
| ATOM | 6015 | CA   | SER | B | 211 | 38.449 | 10.863 | -2.805 | 1.00 | 0.00 |
| ATOM | 6016 | C    | SER | B | 211 | 39.736 | 11.655 | -2.974 | 1.00 | 0.00 |
| ATOM | 6017 | O    | SER | B | 211 | 39.727 | 12.807 | -3.381 | 1.00 | 0.00 |
| ATOM | 6018 | CB   | SER | B | 211 | 38.341 | 10.389 | -1.368 | 1.00 | 0.00 |
| ATOM | 6019 | OG   | SER | B | 211 | 39.302 | 9.418  | -1.060 | 1.00 | 0.00 |
| ATOM | 6020 | H    | SER | B | 211 | 37.862 | 8.879  | -3.362 | 1.00 | 0.00 |
| ATOM | 6021 | HA   | SER | B | 211 | 37.624 | 11.574 | -2.871 | 1.00 | 0.00 |
| ATOM | 6022 | 1HB  | SER | B | 211 | 38.478 | 11.246 | -0.708 | 1.00 | 0.00 |
| ATOM | 6023 | 2HB  | SER | B | 211 | 37.349 | 9.968  | -1.213 | 1.00 | 0.00 |
| ATOM | 6024 | HG   | SER | B | 211 | 39.200 | 9.146  | -0.145 | 1.00 | 0.00 |
| ATOM | 6025 | N    | ILE | B | 212 | 40.854 | 10.949 | -2.722 | 1.00 | 0.00 |
| ATOM | 6026 | CA   | ILE | B | 212 | 42.173 | 11.581 | -2.865 | 1.00 | 0.00 |
| ATOM | 6027 | C    | ILE | B | 212 | 42.367 | 12.321 | -4.187 | 1.00 | 0.00 |
| ATOM | 6028 | O    | ILE | B | 212 | 42.798 | 13.466 | -4.247 | 1.00 | 0.00 |
| ATOM | 6029 | CB   | ILE | B | 212 | 43.299 | 10.539 | -2.726 | 1.00 | 0.00 |
| ATOM | 6030 | CG1  | ILE | B | 212 | 43.359 | 10.007 | -1.292 | 1.00 | 0.00 |
| ATOM | 6031 | CG2  | ILE | B | 212 | 44.635 | 11.142 | -3.130 | 1.00 | 0.00 |
| ATOM | 6032 | CD1  | ILE | B | 212 | 44.248 | 8.796  | -1.126 | 1.00 | 0.00 |
| ATOM | 6033 | H    | ILE | B | 212 | 40.721 | 10.029 | -2.350 | 1.00 | 0.00 |
| ATOM | 6034 | HA   | ILE | B | 212 | 42.305 | 12.367 | -2.122 | 1.00 | 0.00 |
| ATOM | 6035 | HB   | ILE | B | 212 | 43.075 | 9.687  | -3.367 | 1.00 | 0.00 |
| ATOM | 6036 | 1HG1 | ILE | B | 212 | 43.726 | 10.816 | -0.660 | 1.00 | 0.00 |
| ATOM | 6037 | 2HG1 | ILE | B | 212 | 42.340 | 9.752  | -0.997 | 1.00 | 0.00 |
| ATOM | 6038 | 1HG2 | ILE | B | 212 | 45.419 | 10.392 | -3.025 | 1.00 | 0.00 |
| ATOM | 6039 | 2HG2 | ILE | B | 212 | 44.586 | 11.472 | -4.166 | 1.00 | 0.00 |
| ATOM | 6040 | 3HG2 | ILE | B | 212 | 44.859 | 11.994 | -2.488 | 1.00 | 0.00 |
| ATOM | 6041 | 1HD1 | ILE | B | 212 | 44.240 | 8.476  | -0.083 | 1.00 | 0.00 |
| ATOM | 6042 | 2HD1 | ILE | B | 212 | 43.880 | 7.984  | -1.756 | 1.00 | 0.00 |
| ATOM | 6043 | 3HD1 | ILE | B | 212 | 45.266 | 9.048  | -1.418 | 1.00 | 0.00 |



PEDF\_P1\_final\_docking\_model.txt

|      |      |      |     |   |     |        |        |         |      |      |
|------|------|------|-----|---|-----|--------|--------|---------|------|------|
| ATOM | 6044 | N    | GLN | B | 213 | 41.977 | 11.614 | -5.260  | 1.00 | 0.00 |
| ATOM | 6045 | CA   | GLN | B | 213 | 42.072 | 12.227 | -6.584  | 1.00 | 0.00 |
| ATOM | 6046 | C    | GLN | B | 213 | 41.233 | 13.491 | -6.728  | 1.00 | 0.00 |
| ATOM | 6047 | O    | GLN | B | 213 | 41.630 | 14.471 | -7.348  | 1.00 | 0.00 |
| ATOM | 6048 | CB   | GLN | B | 213 | 41.649 | 11.220 | -7.656  | 1.00 | 0.00 |
| ATOM | 6049 | CG   | GLN | B | 213 | 41.772 | 11.737 | -9.080  | 1.00 | 0.00 |
| ATOM | 6050 | CD   | GLN | B | 213 | 41.399 | 10.688 | -10.111 | 1.00 | 0.00 |
| ATOM | 6051 | OE1  | GLN | B | 213 | 40.988 | 9.577  | -9.766  | 1.00 | 0.00 |
| ATOM | 6052 | NE2  | GLN | B | 213 | 41.545 | 11.034 | -11.385 | 1.00 | 0.00 |
| ATOM | 6053 | H    | GLN | B | 213 | 41.513 | 10.741 | -5.123  | 1.00 | 0.00 |
| ATOM | 6054 | HA   | GLN | B | 213 | 43.099 | 12.544 | -6.767  | 1.00 | 0.00 |
| ATOM | 6055 | 1HB  | GLN | B | 213 | 42.280 | 10.339 | -7.529  | 1.00 | 0.00 |
| ATOM | 6056 | 2HB  | GLN | B | 213 | 40.612 | 10.955 | -7.449  | 1.00 | 0.00 |
| ATOM | 6057 | 1HG  | GLN | B | 213 | 41.345 | 12.687 | -9.401  | 1.00 | 0.00 |
| ATOM | 6058 | 2HG  | GLN | B | 213 | 42.859 | 11.819 | -9.048  | 1.00 | 0.00 |
| ATOM | 6059 | 1HE2 | GLN | B | 213 | 41.317 | 10.383 | -12.110 | 1.00 | 0.00 |
| ATOM | 6060 | 2HE2 | GLN | B | 213 | 41.885 | 11.945 | -11.621 | 1.00 | 0.00 |
| ATOM | 6061 | N    | PHE | B | 214 | 40.040 | 13.431 | -6.116  | 1.00 | 0.00 |
| ATOM | 6062 | CA   | PHE | B | 214 | 39.204 | 14.632 | -6.092  | 1.00 | 0.00 |
| ATOM | 6063 | C    | PHE | B | 214 | 39.843 | 15.791 | -5.355  | 1.00 | 0.00 |
| ATOM | 6064 | O    | PHE | B | 214 | 39.881 | 16.913 | -5.842  | 1.00 | 0.00 |
| ATOM | 6065 | CB   | PHE | B | 214 | 37.847 | 14.315 | -5.462  | 1.00 | 0.00 |
| ATOM | 6066 | CG   | PHE | B | 214 | 36.897 | 13.612 | -6.390  | 1.00 | 0.00 |
| ATOM | 6067 | CD1  | PHE | B | 214 | 37.140 | 13.572 | -7.755  | 1.00 | 0.00 |
| ATOM | 6068 | CD2  | PHE | B | 214 | 35.759 | 12.990 | -5.900  | 1.00 | 0.00 |
| ATOM | 6069 | CE1  | PHE | B | 214 | 36.267 | 12.926 | -8.609  | 1.00 | 0.00 |
| ATOM | 6070 | CE2  | PHE | B | 214 | 34.885 | 12.342 | -6.752  | 1.00 | 0.00 |
| ATOM | 6071 | CZ   | PHE | B | 214 | 35.140 | 12.311 | -8.108  | 1.00 | 0.00 |
| ATOM | 6072 | H    | PHE | B | 214 | 39.791 | 12.620 | -5.581  | 1.00 | 0.00 |
| ATOM | 6073 | HA   | PHE | B | 214 | 39.044 | 14.991 | -7.110  | 1.00 | 0.00 |
| ATOM | 6074 | 1HB  | PHE | B | 214 | 37.977 | 13.664 | -4.598  | 1.00 | 0.00 |
| ATOM | 6075 | 2HB  | PHE | B | 214 | 37.354 | 15.235 | -5.151  | 1.00 | 0.00 |
| ATOM | 6076 | HD1  | PHE | B | 214 | 38.032 | 14.058 | -8.151  | 1.00 | 0.00 |
| ATOM | 6077 | HD2  | PHE | B | 214 | 35.557 | 13.015 | -4.829  | 1.00 | 0.00 |
| ATOM | 6078 | HE1  | PHE | B | 214 | 36.470 | 12.903 | -9.680  | 1.00 | 0.00 |
| ATOM | 6079 | HE2  | PHE | B | 214 | 33.994 | 11.856 | -6.354  | 1.00 | 0.00 |
| ATOM | 6080 | HZ   | PHE | B | 214 | 34.451 | 11.802 | -8.781  | 1.00 | 0.00 |
| ATOM | 6081 | N    | ASN | B | 215 | 40.382 | 15.464 | -4.170  | 1.00 | 0.00 |
| ATOM | 6082 | CA   | ASN | B | 215 | 41.040 | 16.500 | -3.371  | 1.00 | 0.00 |
| ATOM | 6083 | C    | ASN | B | 215 | 42.180 | 17.169 | -4.111  | 1.00 | 0.00 |
| ATOM | 6084 | O    | ASN | B | 215 | 42.268 | 18.386 | -4.183  | 1.00 | 0.00 |
| ATOM | 6085 | CB   | ASN | B | 215 | 41.546 | 15.941 | -2.054  | 1.00 | 0.00 |
| ATOM | 6086 | CG   | ASN | B | 215 | 40.455 | 15.645 | -1.062  | 1.00 | 0.00 |
| ATOM | 6087 | OD1  | ASN | B | 215 | 39.333 | 16.153 | -1.173  | 1.00 | 0.00 |
| ATOM | 6088 | ND2  | ASN | B | 215 | 40.800 | 14.891 | -0.050  | 1.00 | 0.00 |
| ATOM | 6089 | H    | ASN | B | 215 | 40.313 | 14.524 | -3.836  | 1.00 | 0.00 |
| ATOM | 6090 | HA   | ASN | B | 215 | 40.330 | 17.296 | -3.140  | 1.00 | 0.00 |
| ATOM | 6091 | 1HB  | ASN | B | 215 | 42.275 | 15.130 | -2.035  | 1.00 | 0.00 |
| ATOM | 6092 | 2HB  | ASN | B | 215 | 42.033 | 16.874 | -1.771  | 1.00 | 0.00 |
| ATOM | 6093 | 1HD2 | ASN | B | 215 | 40.125 | 14.653 | 0.649   | 1.00 | 0.00 |
| ATOM | 6094 | 2HD2 | ASN | B | 215 | 41.738 | 14.554 | 0.024   | 1.00 | 0.00 |
| ATOM | 6095 | N    | LEU | B | 216 | 43.022 | 16.318 | -4.716  | 1.00 | 0.00 |
| ATOM | 6096 | CA   | LEU | B | 216 | 44.134 | 16.848 | -5.508  | 1.00 | 0.00 |
| ATOM | 6097 | C    | LEU | B | 216 | 43.713 | 17.667 | -6.715  | 1.00 | 0.00 |
| ATOM | 6098 | O    | LEU | B | 216 | 44.300 | 18.689 | -7.052  | 1.00 | 0.00 |
| ATOM | 6099 | CB   | LEU | B | 216 | 45.033 | 15.692 | -5.965  | 1.00 | 0.00 |
| ATOM | 6100 | CG   | LEU | B | 216 | 45.687 | 14.887 | -4.836  | 1.00 | 0.00 |
| ATOM | 6101 | CD1  | LEU | B | 216 | 46.402 | 13.671 | -5.408  | 1.00 | 0.00 |
| ATOM | 6102 | CD2  | LEU | B | 216 | 46.661 | 15.776 | -4.076  | 1.00 | 0.00 |
| ATOM | 6103 | H    | LEU | B | 216 | 42.894 | 15.333 | -4.592  | 1.00 | 0.00 |
| ATOM | 6104 | HA   | LEU | B | 216 | 44.718 | 17.539 | -4.900  | 1.00 | 0.00 |
| ATOM | 6105 | 1HB  | LEU | B | 216 | 44.289 | 15.082 | -6.476  | 1.00 | 0.00 |
| ATOM | 6106 | 2HB  | LEU | B | 216 | 45.784 | 16.024 | -6.682  | 1.00 | 0.00 |

PEDF\_P1\_final\_docking\_model.txt

|      |      |      |     |   |     |        |        |         |      |      |
|------|------|------|-----|---|-----|--------|--------|---------|------|------|
| ATOM | 6107 | HG   | LEU | B | 216 | 44.895 | 14.594 | -4.146  | 1.00 | 0.00 |
| ATOM | 6108 | 1HD1 | LEU | B | 216 | 46.863 | 13.105 | -4.598  | 1.00 | 0.00 |
| ATOM | 6109 | 2HD1 | LEU | B | 216 | 45.681 | 13.037 | -5.927  | 1.00 | 0.00 |
| ATOM | 6110 | 3HD1 | LEU | B | 216 | 47.170 | 13.995 | -6.107  | 1.00 | 0.00 |
| ATOM | 6111 | 1HD2 | LEU | B | 216 | 47.125 | 15.203 | -3.273  | 1.00 | 0.00 |
| ATOM | 6112 | 2HD2 | LEU | B | 216 | 47.431 | 16.138 | -4.757  | 1.00 | 0.00 |
| ATOM | 6113 | 3HD2 | LEU | B | 216 | 46.125 | 16.625 | -3.652  | 1.00 | 0.00 |
| ATOM | 6114 | N    | ARG | B | 217 | 42.631 | 17.182 | -7.349  | 1.00 | 0.00 |
| ATOM | 6115 | CA   | ARG | B | 217 | 42.059 | 17.955 | -8.451  | 1.00 | 0.00 |
| ATOM | 6116 | C    | ARG | B | 217 | 41.611 | 19.338 | -8.027  | 1.00 | 0.00 |
| ATOM | 6117 | O    | ARG | B | 217 | 41.837 | 20.339 | -8.696  | 1.00 | 0.00 |
| ATOM | 6118 | CB   | ARG | B | 217 | 40.926 | 17.208 | -9.140  | 1.00 | 0.00 |
| ATOM | 6119 | CG   | ARG | B | 217 | 40.360 | 17.898 | -10.370 | 1.00 | 0.00 |
| ATOM | 6120 | CD   | ARG | B | 217 | 39.237 | 17.173 | -11.017 | 1.00 | 0.00 |
| ATOM | 6121 | NE   | ARG | B | 217 | 39.594 | 15.873 | -11.563 | 1.00 | 0.00 |
| ATOM | 6122 | CZ   | ARG | B | 217 | 38.714 | 14.892 | -11.843 | 1.00 | 0.00 |
| ATOM | 6123 | NH1  | ARG | B | 217 | 37.432 | 15.042 | -11.595 | 1.00 | 0.00 |
| ATOM | 6124 | NH2  | ARG | B | 217 | 39.178 | 13.764 | -12.351 | 1.00 | 0.00 |
| ATOM | 6125 | H    | ARG | B | 217 | 42.216 | 16.324 | -7.043  | 1.00 | 0.00 |
| ATOM | 6126 | HA   | ARG | B | 217 | 42.814 | 18.114 | -9.221  | 1.00 | 0.00 |
| ATOM | 6127 | 1HB  | ARG | B | 217 | 41.316 | 16.231 | -9.423  | 1.00 | 0.00 |
| ATOM | 6128 | 2HB  | ARG | B | 217 | 40.134 | 17.082 | -8.402  | 1.00 | 0.00 |
| ATOM | 6129 | 1HG  | ARG | B | 217 | 39.998 | 18.885 | -10.078 | 1.00 | 0.00 |
| ATOM | 6130 | 2HG  | ARG | B | 217 | 41.158 | 18.007 | -11.105 | 1.00 | 0.00 |
| ATOM | 6131 | 1HD  | ARG | B | 217 | 38.449 | 17.011 | -10.282 | 1.00 | 0.00 |
| ATOM | 6132 | 2HD  | ARG | B | 217 | 38.850 | 17.777 | -11.837 | 1.00 | 0.00 |
| ATOM | 6133 | HE   | ARG | B | 217 | 40.504 | 15.507 | -11.812 | 1.00 | 0.00 |
| ATOM | 6134 | 1HH1 | ARG | B | 217 | 37.096 | 15.904 | -11.189 | 1.00 | 0.00 |
| ATOM | 6135 | 2HH1 | ARG | B | 217 | 36.789 | 14.295 | -11.811 | 1.00 | 0.00 |
| ATOM | 6136 | 1HH2 | ARG | B | 217 | 40.169 | 13.659 | -12.519 | 1.00 | 0.00 |
| ATOM | 6137 | 2HH2 | ARG | B | 217 | 38.540 | 13.013 | -12.569 | 1.00 | 0.00 |
| ATOM | 6138 | N    | ASN | B | 218 | 40.990 | 19.333 | -6.841  | 1.00 | 0.00 |
| ATOM | 6139 | CA   | ASN | B | 218 | 40.566 | 20.608 | -6.281  | 1.00 | 0.00 |
| ATOM | 6140 | C    | ASN | B | 218 | 41.725 | 21.518 | -5.980  | 1.00 | 0.00 |
| ATOM | 6141 | O    | ASN | B | 218 | 41.751 | 22.631 | -6.470  | 1.00 | 0.00 |
| ATOM | 6142 | CB   | ASN | B | 218 | 39.734 | 20.411 | -5.028  | 1.00 | 0.00 |
| ATOM | 6143 | CG   | ASN | B | 218 | 38.336 | 19.929 | -5.299  | 1.00 | 0.00 |
| ATOM | 6144 | OD1  | ASN | B | 218 | 37.528 | 20.625 | -5.925  | 1.00 | 0.00 |
| ATOM | 6145 | ND2  | ASN | B | 218 | 38.021 | 18.778 | -4.762  | 1.00 | 0.00 |
| ATOM | 6146 | H    | ASN | B | 218 | 40.849 | 18.476 | -6.346  | 1.00 | 0.00 |
| ATOM | 6147 | HA   | ASN | B | 218 | 39.950 | 21.143 | -7.005  | 1.00 | 0.00 |
| ATOM | 6148 | 1HB  | ASN | B | 218 | 40.137 | 19.874 | -4.168  | 1.00 | 0.00 |
| ATOM | 6149 | 2HB  | ASN | B | 218 | 39.700 | 21.478 | -4.806  | 1.00 | 0.00 |
| ATOM | 6150 | 1HD2 | ASN | B | 218 | 37.107 | 18.395 | -4.901  | 1.00 | 0.00 |
| ATOM | 6151 | 2HD2 | ASN | B | 218 | 38.693 | 18.282 | -4.213  | 1.00 | 0.00 |
| ATOM | 6152 | N    | LEU | B | 219 | 42.712 | 20.998 | -5.230  | 1.00 | 0.00 |
| ATOM | 6153 | CA   | LEU | B | 219 | 43.920 | 21.786 | -4.952  | 1.00 | 0.00 |
| ATOM | 6154 | C    | LEU | B | 219 | 44.533 | 22.438 | -6.180  | 1.00 | 0.00 |
| ATOM | 6155 | O    | LEU | B | 219 | 44.677 | 23.650 | -6.270  | 1.00 | 0.00 |
| ATOM | 6156 | CB   | LEU | B | 219 | 44.969 | 20.898 | -4.270  | 1.00 | 0.00 |
| ATOM | 6157 | CG   | LEU | B | 219 | 44.659 | 20.522 | -2.816  | 1.00 | 0.00 |
| ATOM | 6158 | CD1  | LEU | B | 219 | 45.646 | 19.470 | -2.327  | 1.00 | 0.00 |
| ATOM | 6159 | CD2  | LEU | B | 219 | 44.722 | 21.767 | -1.944  | 1.00 | 0.00 |
| ATOM | 6160 | H    | LEU | B | 219 | 42.604 | 20.084 | -4.842  | 1.00 | 0.00 |
| ATOM | 6161 | HA   | LEU | B | 219 | 43.670 | 22.617 | -4.292  | 1.00 | 0.00 |
| ATOM | 6162 | 1HB  | LEU | B | 219 | 44.896 | 20.018 | -4.908  | 1.00 | 0.00 |
| ATOM | 6163 | 2HB  | LEU | B | 219 | 45.970 | 21.322 | -4.349  | 1.00 | 0.00 |
| ATOM | 6164 | HG   | LEU | B | 219 | 43.636 | 20.147 | -2.789  | 1.00 | 0.00 |
| ATOM | 6165 | 1HD1 | LEU | B | 219 | 45.419 | 19.209 | -1.294  | 1.00 | 0.00 |
| ATOM | 6166 | 2HD1 | LEU | B | 219 | 45.568 | 18.580 | -2.951  | 1.00 | 0.00 |
| ATOM | 6167 | 3HD1 | LEU | B | 219 | 46.659 | 19.868 | -2.386  | 1.00 | 0.00 |
| ATOM | 6168 | 1HD2 | LEU | B | 219 | 44.501 | 21.498 | -0.910  | 1.00 | 0.00 |
| ATOM | 6169 | 2HD2 | LEU | B | 219 | 45.719 | 22.202 | -2.001  | 1.00 | 0.00 |

PEDF\_P1\_final\_docking\_model.txt

|      |      |      |     |   |     |        |        |         |      |      |
|------|------|------|-----|---|-----|--------|--------|---------|------|------|
| ATOM | 6170 | 3HD2 | LEU | B | 219 | 43.988 | 22.494 | -2.293  | 1.00 | 0.00 |
| ATOM | 6171 | N    | TYR | B | 220 | 44.813 | 21.580 | -7.179  | 1.00 | 0.00 |
| ATOM | 6172 | CA   | TYR | B | 220 | 45.346 | 22.134 | -8.426  | 1.00 | 0.00 |
| ATOM | 6173 | C    | TYR | B | 220 | 44.519 | 23.263 | -9.029  | 1.00 | 0.00 |
| ATOM | 6174 | O    | TYR | B | 220 | 45.047 | 24.219 | -9.582  | 1.00 | 0.00 |
| ATOM | 6175 | CB   | TYR | B | 220 | 45.608 | 21.033 | -9.465  | 1.00 | 0.00 |
| ATOM | 6176 | CG   | TYR | B | 220 | 46.284 | 21.624 | -10.687 | 1.00 | 0.00 |
| ATOM | 6177 | CD1  | TYR | B | 220 | 47.672 | 21.864 | -10.659 | 1.00 | 0.00 |
| ATOM | 6178 | CD2  | TYR | B | 220 | 45.499 | 21.947 | -11.814 | 1.00 | 0.00 |
| ATOM | 6179 | CE1  | TYR | B | 220 | 48.291 | 22.439 | -11.781 | 1.00 | 0.00 |
| ATOM | 6180 | CE2  | TYR | B | 220 | 46.115 | 22.533 | -12.930 | 1.00 | 0.00 |
| ATOM | 6181 | CZ   | TYR | B | 220 | 47.507 | 22.749 | -12.910 | 1.00 | 0.00 |
| ATOM | 6182 | OH   | TYR | B | 220 | 48.116 | 23.264 | -14.041 | 1.00 | 0.00 |
| ATOM | 6183 | H    | TYR | B | 220 | 44.675 | 20.597 | -7.043  | 1.00 | 0.00 |
| ATOM | 6184 | HA   | TYR | B | 220 | 46.323 | 22.582 | -8.244  | 1.00 | 0.00 |
| ATOM | 6185 | 1HB  | TYR | B | 220 | 46.238 | 20.282 | -8.987  | 1.00 | 0.00 |
| ATOM | 6186 | 2HB  | TYR | B | 220 | 44.644 | 20.592 | -9.717  | 1.00 | 0.00 |
| ATOM | 6187 | HD1  | TYR | B | 220 | 48.234 | 21.597 | -9.764  | 1.00 | 0.00 |
| ATOM | 6188 | HD2  | TYR | B | 220 | 44.431 | 21.734 | -11.789 | 1.00 | 0.00 |
| ATOM | 6189 | HE1  | TYR | B | 220 | 49.363 | 22.633 | -11.780 | 1.00 | 0.00 |
| ATOM | 6190 | HE2  | TYR | B | 220 | 45.517 | 22.816 | -13.796 | 1.00 | 0.00 |
| ATOM | 6191 | HH   | TYR | B | 220 | 48.885 | 22.714 | -14.234 | 1.00 | 0.00 |
| ATOM | 6192 | N    | ARG | B | 221 | 43.194 | 23.112 | -8.895  | 1.00 | 0.00 |
| ATOM | 6193 | CA   | ARG | B | 221 | 42.354 | 24.240 | -9.283  | 1.00 | 0.00 |
| ATOM | 6194 | C    | ARG | B | 221 | 42.564 | 25.474 | -8.404  | 1.00 | 0.00 |
| ATOM | 6195 | O    | ARG | B | 221 | 42.808 | 26.578 | -8.882  | 1.00 | 0.00 |
| ATOM | 6196 | CB   | ARG | B | 221 | 40.885 | 23.848 | -9.334  | 1.00 | 0.00 |
| ATOM | 6197 | CG   | ARG | B | 221 | 40.508 | 22.929 | -10.485 | 1.00 | 0.00 |
| ATOM | 6198 | CD   | ARG | B | 221 | 39.075 | 22.537 | -10.511 | 1.00 | 0.00 |
| ATOM | 6199 | NE   | ARG | B | 221 | 38.726 | 21.599 | -11.566 | 1.00 | 0.00 |
| ATOM | 6200 | CZ   | ARG | B | 221 | 38.503 | 21.941 | -12.850 | 1.00 | 0.00 |
| ATOM | 6201 | NH1  | ARG | B | 221 | 38.554 | 23.197 | -13.236 | 1.00 | 0.00 |
| ATOM | 6202 | NH2  | ARG | B | 221 | 38.208 | 20.981 | -13.710 | 1.00 | 0.00 |
| ATOM | 6203 | H    | ARG | B | 221 | 42.816 | 22.322 | -8.408  | 1.00 | 0.00 |
| ATOM | 6204 | HA   | ARG | B | 221 | 42.610 | 24.560 | -10.294 | 1.00 | 0.00 |
| ATOM | 6205 | 1HB  | ARG | B | 221 | 40.654 | 23.357 | -8.391  | 1.00 | 0.00 |
| ATOM | 6206 | 2HB  | ARG | B | 221 | 40.313 | 24.773 | -9.412  | 1.00 | 0.00 |
| ATOM | 6207 | 1HG  | ARG | B | 221 | 40.734 | 23.436 | -11.423 | 1.00 | 0.00 |
| ATOM | 6208 | 2HG  | ARG | B | 221 | 41.105 | 22.019 | -10.411 | 1.00 | 0.00 |
| ATOM | 6209 | 1HD  | ARG | B | 221 | 38.819 | 22.069 | -9.561  | 1.00 | 0.00 |
| ATOM | 6210 | 2HD  | ARG | B | 221 | 38.466 | 23.429 | -10.652 | 1.00 | 0.00 |
| ATOM | 6211 | HE   | ARG | B | 221 | 38.600 | 20.597 | -11.522 | 1.00 | 0.00 |
| ATOM | 6212 | 1HH1 | ARG | B | 221 | 38.763 | 23.921 | -12.563 | 1.00 | 0.00 |
| ATOM | 6213 | 2HH1 | ARG | B | 221 | 38.383 | 23.432 | -14.203 | 1.00 | 0.00 |
| ATOM | 6214 | 1HH2 | ARG | B | 221 | 38.155 | 20.023 | -13.393 | 1.00 | 0.00 |
| ATOM | 6215 | 2HH2 | ARG | B | 221 | 38.035 | 21.210 | -14.677 | 1.00 | 0.00 |
| ATOM | 6216 | N    | LEU | B | 222 | 42.445 | 25.233 | -7.093  | 1.00 | 0.00 |
| ATOM | 6217 | CA   | LEU | B | 222 | 42.431 | 26.308 | -6.104  | 1.00 | 0.00 |
| ATOM | 6218 | C    | LEU | B | 222 | 43.663 | 27.184 | -6.174  | 1.00 | 0.00 |
| ATOM | 6219 | O    | LEU | B | 222 | 43.599 | 28.364 | -6.504  | 1.00 | 0.00 |
| ATOM | 6220 | CB   | LEU | B | 222 | 42.292 | 25.721 | -4.694  | 1.00 | 0.00 |
| ATOM | 6221 | CG   | LEU | B | 222 | 41.001 | 24.932 | -4.440  | 1.00 | 0.00 |
| ATOM | 6222 | CD1  | LEU | B | 222 | 41.160 | 24.053 | -3.207  | 1.00 | 0.00 |
| ATOM | 6223 | CD2  | LEU | B | 222 | 39.839 | 25.899 | -4.266  | 1.00 | 0.00 |
| ATOM | 6224 | H    | LEU | B | 222 | 42.450 | 24.284 | -6.788  | 1.00 | 0.00 |
| ATOM | 6225 | HA   | LEU | B | 222 | 41.589 | 26.971 | -6.298  | 1.00 | 0.00 |
| ATOM | 6226 | 1HB  | LEU | B | 222 | 43.147 | 25.047 | -4.697  | 1.00 | 0.00 |
| ATOM | 6227 | 2HB  | LEU | B | 222 | 42.431 | 26.480 | -3.924  | 1.00 | 0.00 |
| ATOM | 6228 | HG   | LEU | B | 222 | 40.806 | 24.334 | -5.330  | 1.00 | 0.00 |
| ATOM | 6229 | 1HD1 | LEU | B | 222 | 40.239 | 23.496 | -3.035  | 1.00 | 0.00 |
| ATOM | 6230 | 2HD1 | LEU | B | 222 | 41.982 | 23.353 | -3.362  | 1.00 | 0.00 |
| ATOM | 6231 | 3HD1 | LEU | B | 222 | 41.374 | 24.677 | -2.340  | 1.00 | 0.00 |
| ATOM | 6232 | 1HD2 | LEU | B | 222 | 38.922 | 25.336 | -4.087  | 1.00 | 0.00 |

PEDF\_P1\_final\_docking\_model.txt

|      |      |      |     |   |     |        |        |         |      |      |
|------|------|------|-----|---|-----|--------|--------|---------|------|------|
| ATOM | 6233 | 2HD2 | LEU | B | 222 | 40.035 | 26.555 | -3.418  | 1.00 | 0.00 |
| ATOM | 6234 | 3HD2 | LEU | B | 222 | 39.725 | 26.498 | -5.170  | 1.00 | 0.00 |
| ATOM | 6235 | N    | SER | B | 223 | 44.795 | 26.536 | -5.873  | 1.00 | 0.00 |
| ATOM | 6236 | CA   | SER | B | 223 | 46.054 | 27.263 | -5.757  | 1.00 | 0.00 |
| ATOM | 6237 | C    | SER | B | 223 | 46.495 | 27.947 | -7.037  | 1.00 | 0.00 |
| ATOM | 6238 | O    | SER | B | 223 | 47.058 | 29.038 | -7.032  | 1.00 | 0.00 |
| ATOM | 6239 | CB   | SER | B | 223 | 47.141 | 26.315 | -5.288  | 1.00 | 0.00 |
| ATOM | 6240 | OG   | SER | B | 223 | 48.303 | 26.996 | -4.901  | 1.00 | 0.00 |
| ATOM | 6241 | H    | SER | B | 223 | 44.822 | 25.561 | -5.627  | 1.00 | 0.00 |
| ATOM | 6242 | HA   | SER | B | 223 | 46.051 | 28.010 | -4.962  | 1.00 | 0.00 |
| ATOM | 6243 | 1HB  | SER | B | 223 | 46.764 | 25.746 | -4.438  | 1.00 | 0.00 |
| ATOM | 6244 | 2HB  | SER | B | 223 | 47.384 | 25.633 | -6.101  | 1.00 | 0.00 |
| ATOM | 6245 | HG   | SER | B | 223 | 48.188 | 27.345 | -4.014  | 1.00 | 0.00 |
| ATOM | 6246 | N    | LYS | B | 224 | 46.150 | 27.288 | -8.168  | 1.00 | 0.00 |
| ATOM | 6247 | CA   | LYS | B | 224 | 46.515 | 27.844 | -9.476  | 1.00 | 0.00 |
| ATOM | 6248 | C    | LYS | B | 224 | 46.110 | 29.286 | -9.728  | 1.00 | 0.00 |
| ATOM | 6249 | O    | LYS | B | 224 | 46.729 | 30.001 | -10.504 | 1.00 | 0.00 |
| ATOM | 6250 | CB   | LYS | B | 224 | 45.920 | 26.969 | -10.580 | 1.00 | 0.00 |
| ATOM | 6251 | CG   | LYS | B | 224 | 46.270 | 27.416 | -11.994 | 1.00 | 0.00 |
| ATOM | 6252 | CD   | LYS | B | 224 | 45.711 | 26.455 | -13.032 | 1.00 | 0.00 |
| ATOM | 6253 | CE   | LYS | B | 224 | 46.070 | 26.895 | -14.445 | 1.00 | 0.00 |
| ATOM | 6254 | NZ   | LYS | B | 224 | 45.567 | 25.939 | -15.469 | 1.00 | 0.00 |
| ATOM | 6255 | H    | LYS | B | 224 | 45.672 | 26.411 | -8.087  | 1.00 | 0.00 |
| ATOM | 6256 | HA   | LYS | B | 224 | 47.601 | 27.862 | -9.578  | 1.00 | 0.00 |
| ATOM | 6257 | 1HB  | LYS | B | 224 | 46.289 | 25.956 | -10.419 | 1.00 | 0.00 |
| ATOM | 6258 | 2HB  | LYS | B | 224 | 44.838 | 26.985 | -10.453 | 1.00 | 0.00 |
| ATOM | 6259 | 1HG  | LYS | B | 224 | 45.852 | 28.410 | -12.156 | 1.00 | 0.00 |
| ATOM | 6260 | 2HG  | LYS | B | 224 | 47.356 | 27.459 | -12.085 | 1.00 | 0.00 |
| ATOM | 6261 | 1HD  | LYS | B | 224 | 46.124 | 25.463 | -12.844 | 1.00 | 0.00 |
| ATOM | 6262 | 2HD  | LYS | B | 224 | 44.627 | 26.422 | -12.927 | 1.00 | 0.00 |
| ATOM | 6263 | 1HE  | LYS | B | 224 | 45.631 | 27.876 | -14.618 | 1.00 | 0.00 |
| ATOM | 6264 | 2HE  | LYS | B | 224 | 47.155 | 26.964 | -14.515 | 1.00 | 0.00 |
| ATOM | 6265 | 1HZ  | LYS | B | 224 | 45.825 | 26.267 | -16.389 | 1.00 | 0.00 |
| ATOM | 6266 | 2HZ  | LYS | B | 224 | 45.974 | 25.029 | -15.310 | 1.00 | 0.00 |
| ATOM | 6267 | 3HZ  | LYS | B | 224 | 44.561 | 25.875 | -15.404 | 1.00 | 0.00 |
| ATOM | 6268 | N    | ALA | B | 225 | 45.068 | 29.686 | -8.981  | 1.00 | 0.00 |
| ATOM | 6269 | CA   | ALA | B | 225 | 44.694 | 31.093 | -8.835  | 1.00 | 0.00 |
| ATOM | 6270 | C    | ALA | B | 225 | 45.833 | 32.103 | -8.855  | 1.00 | 0.00 |
| ATOM | 6271 | O    | ALA | B | 225 | 45.790 | 33.148 | -9.495  | 1.00 | 0.00 |
| ATOM | 6272 | CB   | ALA | B | 225 | 44.006 | 31.263 | -7.489  | 1.00 | 0.00 |
| ATOM | 6273 | H    | ALA | B | 225 | 44.583 | 28.997 | -8.437  | 1.00 | 0.00 |
| ATOM | 6274 | HA   | ALA | B | 225 | 44.070 | 31.378 | -9.683  | 1.00 | 0.00 |
| ATOM | 6275 | 1HB  | ALA | B | 225 | 43.718 | 32.307 | -7.358  | 1.00 | 0.00 |
| ATOM | 6276 | 2HB  | ALA | B | 225 | 43.117 | 30.634 | -7.452  | 1.00 | 0.00 |
| ATOM | 6277 | 3HB  | ALA | B | 225 | 44.689 | 30.973 | -6.693  | 1.00 | 0.00 |
| ATOM | 6278 | N    | LEU | B | 226 | 46.844 | 31.743 | -8.051  | 1.00 | 0.00 |
| ATOM | 6279 | CA   | LEU | B | 226 | 47.964 | 32.648 | -7.824  | 1.00 | 0.00 |
| ATOM | 6280 | C    | LEU | B | 226 | 49.295 | 31.938 | -7.695  | 1.00 | 0.00 |
| ATOM | 6281 | O    | LEU | B | 226 | 50.314 | 32.389 | -8.196  | 1.00 | 0.00 |
| ATOM | 6282 | CB   | LEU | B | 226 | 47.703 | 33.488 | -6.567  | 1.00 | 0.00 |
| ATOM | 6283 | CG   | LEU | B | 226 | 46.633 | 34.577 | -6.719  | 1.00 | 0.00 |
| ATOM | 6284 | CD1  | LEU | B | 226 | 46.328 | 35.202 | -5.364  | 1.00 | 0.00 |
| ATOM | 6285 | CD2  | LEU | B | 226 | 47.118 | 35.632 | -7.702  | 1.00 | 0.00 |
| ATOM | 6286 | H    | LEU | B | 226 | 46.796 | 30.847 | -7.611  | 1.00 | 0.00 |
| ATOM | 6287 | HA   | LEU | B | 226 | 48.076 | 33.312 | -8.680  | 1.00 | 0.00 |
| ATOM | 6288 | 1HB  | LEU | B | 226 | 47.346 | 32.704 | -5.901  | 1.00 | 0.00 |
| ATOM | 6289 | 2HB  | LEU | B | 226 | 48.624 | 33.913 | -6.167  | 1.00 | 0.00 |
| ATOM | 6290 | HG   | LEU | B | 226 | 45.748 | 34.104 | -7.146  | 1.00 | 0.00 |
| ATOM | 6291 | 1HD1 | LEU | B | 226 | 45.567 | 35.973 | -5.482  | 1.00 | 0.00 |
| ATOM | 6292 | 2HD1 | LEU | B | 226 | 45.961 | 34.433 | -4.684  | 1.00 | 0.00 |
| ATOM | 6293 | 3HD1 | LEU | B | 226 | 47.234 | 35.646 | -4.956  | 1.00 | 0.00 |
| ATOM | 6294 | 1HD2 | LEU | B | 226 | 46.356 | 36.405 | -7.810  | 1.00 | 0.00 |
| ATOM | 6295 | 2HD2 | LEU | B | 226 | 48.040 | 36.079 | -7.332  | 1.00 | 0.00 |

PEDF\_P1\_final\_docking\_model.txt

|      |      |      |     |   |     |        |        |         |      |      |
|------|------|------|-----|---|-----|--------|--------|---------|------|------|
| ATOM | 6296 | 3HD2 | LEU | B | 226 | 47.303 | 35.168 | -8.672  | 1.00 | 0.00 |
| ATOM | 6297 | N    | PHE | B | 227 | 49.234 | 30.788 | -7.012  | 1.00 | 0.00 |
| ATOM | 6298 | CA   | PHE | B | 227 | 50.407 | 29.919 | -6.992  | 1.00 | 0.00 |
| ATOM | 6299 | C    | PHE | B | 227 | 50.088 | 28.602 | -7.676  | 1.00 | 0.00 |
| ATOM | 6300 | O    | PHE | B | 227 | 49.590 | 27.664 | -7.066  | 1.00 | 0.00 |
| ATOM | 6301 | CB   | PHE | B | 227 | 50.880 | 29.673 | -5.558  | 1.00 | 0.00 |
| ATOM | 6302 | CG   | PHE | B | 227 | 51.483 | 30.883 | -4.903  | 1.00 | 0.00 |
| ATOM | 6303 | CD1  | PHE | B | 227 | 50.676 | 31.894 | -4.404  | 1.00 | 0.00 |
| ATOM | 6304 | CD2  | PHE | B | 227 | 52.859 | 31.013 | -4.784  | 1.00 | 0.00 |
| ATOM | 6305 | CE1  | PHE | B | 227 | 51.229 | 33.008 | -3.801  | 1.00 | 0.00 |
| ATOM | 6306 | CE2  | PHE | B | 227 | 53.415 | 32.124 | -4.181  | 1.00 | 0.00 |
| ATOM | 6307 | CZ   | PHE | B | 227 | 52.599 | 33.123 | -3.689  | 1.00 | 0.00 |
| ATOM | 6308 | H    | PHE | B | 227 | 48.382 | 30.443 | -6.618  | 1.00 | 0.00 |
| ATOM | 6309 | HA   | PHE | B | 227 | 51.222 | 30.386 | -7.548  | 1.00 | 0.00 |
| ATOM | 6310 | 1HB  | PHE | B | 227 | 50.043 | 29.366 | -4.934  | 1.00 | 0.00 |
| ATOM | 6311 | 2HB  | PHE | B | 227 | 51.646 | 28.898 | -5.544  | 1.00 | 0.00 |
| ATOM | 6312 | HD1  | PHE | B | 227 | 49.593 | 31.803 | -4.491  | 1.00 | 0.00 |
| ATOM | 6313 | HD2  | PHE | B | 227 | 53.504 | 30.224 | -5.173  | 1.00 | 0.00 |
| ATOM | 6314 | HE1  | PHE | B | 227 | 50.583 | 33.795 | -3.414  | 1.00 | 0.00 |
| ATOM | 6315 | HE2  | PHE | B | 227 | 54.497 | 32.214 | -4.094  | 1.00 | 0.00 |
| ATOM | 6316 | HZ   | PHE | B | 227 | 53.036 | 34.001 | -3.215  | 1.00 | 0.00 |
| ATOM | 6317 | N    | PRO | B | 228 | 50.373 | 28.545 | -8.997  | 1.00 | 0.00 |
| ATOM | 6318 | CA   | PRO | B | 228 | 50.155 | 27.287 | -9.722  | 1.00 | 0.00 |
| ATOM | 6319 | C    | PRO | B | 228 | 50.991 | 26.157 | -9.146  | 1.00 | 0.00 |
| ATOM | 6320 | O    | PRO | B | 228 | 52.212 | 26.235 | -9.165  | 1.00 | 0.00 |
| ATOM | 6321 | CB   | PRO | B | 228 | 50.582 | 27.645 | -11.152 | 1.00 | 0.00 |
| ATOM | 6322 | CG   | PRO | B | 228 | 50.486 | 29.166 | -11.247 | 1.00 | 0.00 |
| ATOM | 6323 | CD   | PRO | B | 228 | 50.890 | 29.608 | -9.849  | 1.00 | 0.00 |
| ATOM | 6324 | HA   | PRO | B | 228 | 49.117 | 26.931 | -9.654  | 1.00 | 0.00 |
| ATOM | 6325 | 1HB  | PRO | B | 228 | 51.609 | 27.310 | -11.362 | 1.00 | 0.00 |
| ATOM | 6326 | 2HB  | PRO | B | 228 | 49.928 | 27.170 | -11.899 | 1.00 | 0.00 |
| ATOM | 6327 | 1HG  | PRO | B | 228 | 51.159 | 29.560 | -12.025 | 1.00 | 0.00 |
| ATOM | 6328 | 2HG  | PRO | B | 228 | 49.468 | 29.485 | -11.512 | 1.00 | 0.00 |
| ATOM | 6329 | 1HD  | PRO | B | 228 | 51.981 | 29.706 | -9.742  | 1.00 | 0.00 |
| ATOM | 6330 | 2HD  | PRO | B | 228 | 50.453 | 30.581 | -9.577  | 1.00 | 0.00 |
| ATOM | 6331 | N    | PRO | B | 229 | 50.296 | 25.105 | -8.637  | 1.00 | 0.00 |
| ATOM | 6332 | CA   | PRO | B | 229 | 50.997 | 24.004 | -7.967  | 1.00 | 0.00 |
| ATOM | 6333 | C    | PRO | B | 229 | 52.205 | 23.504 | -8.730  | 1.00 | 0.00 |
| ATOM | 6334 | O    | PRO | B | 229 | 52.114 | 23.016 | -9.853  | 1.00 | 0.00 |
| ATOM | 6335 | CB   | PRO | B | 229 | 49.928 | 22.914 | -7.838  | 1.00 | 0.00 |
| ATOM | 6336 | CG   | PRO | B | 229 | 48.645 | 23.665 | -7.731  | 1.00 | 0.00 |
| ATOM | 6337 | CD   | PRO | B | 229 | 48.838 | 24.906 | -8.560  | 1.00 | 0.00 |
| ATOM | 6338 | HA   | PRO | B | 229 | 51.411 | 24.295 | -6.990  | 1.00 | 0.00 |
| ATOM | 6339 | 1HB  | PRO | B | 229 | 49.927 | 22.245 | -8.712  | 1.00 | 0.00 |
| ATOM | 6340 | 2HB  | PRO | B | 229 | 50.098 | 22.286 | -6.951  | 1.00 | 0.00 |
| ATOM | 6341 | 1HG  | PRO | B | 229 | 47.801 | 23.066 | -8.106  | 1.00 | 0.00 |
| ATOM | 6342 | 2HG  | PRO | B | 229 | 48.419 | 23.918 | -6.684  | 1.00 | 0.00 |
| ATOM | 6343 | 1HD  | PRO | B | 229 | 48.407 | 24.806 | -9.566  | 1.00 | 0.00 |
| ATOM | 6344 | 2HD  | PRO | B | 229 | 48.373 | 25.791 | -8.099  | 1.00 | 0.00 |
| ATOM | 6345 | N    | GLU | B | 230 | 53.344 | 23.708 | -8.063  | 1.00 | 0.00 |
| ATOM | 6346 | CA   | GLU | B | 230 | 54.648 | 23.631 | -8.712  | 1.00 | 0.00 |
| ATOM | 6347 | C    | GLU | B | 230 | 54.851 | 22.421 | -9.609  | 1.00 | 0.00 |
| ATOM | 6348 | O    | GLU | B | 230 | 54.489 | 21.297 | -9.277  | 1.00 | 0.00 |
| ATOM | 6349 | CB   | GLU | B | 230 | 55.748 | 23.656 | -7.648  | 1.00 | 0.00 |
| ATOM | 6350 | CG   | GLU | B | 230 | 57.163 | 23.600 | -8.206  | 1.00 | 0.00 |
| ATOM | 6351 | CD   | GLU | B | 230 | 58.186 | 23.645 | -7.105  | 1.00 | 0.00 |
| ATOM | 6352 | OE1  | GLU | B | 230 | 57.800 | 23.744 | -5.965  | 1.00 | 0.00 |
| ATOM | 6353 | OE2  | GLU | B | 230 | 59.347 | 23.469 | -7.392  | 1.00 | 0.00 |
| ATOM | 6354 | H    | GLU | B | 230 | 53.286 | 24.106 | -7.144  | 1.00 | 0.00 |
| ATOM | 6355 | HA   | GLU | B | 230 | 54.778 | 24.482 | -9.381  | 1.00 | 0.00 |
| ATOM | 6356 | 1HB  | GLU | B | 230 | 55.618 | 24.575 | -7.078  | 1.00 | 0.00 |
| ATOM | 6357 | 2HB  | GLU | B | 230 | 55.580 | 22.797 | -6.997  | 1.00 | 0.00 |
| ATOM | 6358 | 1HG  | GLU | B | 230 | 57.347 | 22.730 | -8.835  | 1.00 | 0.00 |

PEDF\_P1\_final\_docking\_model.txt

|      |      |      |     |   |     |        |        |         |      |      |
|------|------|------|-----|---|-----|--------|--------|---------|------|------|
| ATOM | 6359 | 2HG  | GLU | B | 230 | 57.237 | 24.505 | -8.807  | 1.00 | 0.00 |
| ATOM | 6360 | N    | PRO | B | 231 | 55.499 | 22.677 | -10.771 | 1.00 | 0.00 |
| ATOM | 6361 | CA   | PRO | B | 231 | 55.824 | 21.606 | -11.727 | 1.00 | 0.00 |
| ATOM | 6362 | C    | PRO | B | 231 | 56.574 | 20.369 | -11.225 | 1.00 | 0.00 |
| ATOM | 6363 | O    | PRO | B | 231 | 56.813 | 19.441 | -11.993 | 1.00 | 0.00 |
| ATOM | 6364 | CB   | PRO | B | 231 | 56.597 | 22.345 | -12.824 | 1.00 | 0.00 |
| ATOM | 6365 | CG   | PRO | B | 231 | 56.089 | 23.782 | -12.763 | 1.00 | 0.00 |
| ATOM | 6366 | CD   | PRO | B | 231 | 55.886 | 23.995 | -11.269 | 1.00 | 0.00 |
| ATOM | 6367 | HA   | PRO | B | 231 | 54.928 | 21.130 | -12.153 | 1.00 | 0.00 |
| ATOM | 6368 | 1HB  | PRO | B | 231 | 57.683 | 22.303 | -12.651 | 1.00 | 0.00 |
| ATOM | 6369 | 2HB  | PRO | B | 231 | 56.411 | 21.904 | -13.815 | 1.00 | 0.00 |
| ATOM | 6370 | 1HG  | PRO | B | 231 | 56.822 | 24.482 | -13.192 | 1.00 | 0.00 |
| ATOM | 6371 | 2HG  | PRO | B | 231 | 55.158 | 23.900 | -13.336 | 1.00 | 0.00 |
| ATOM | 6372 | 1HD  | PRO | B | 231 | 56.801 | 24.347 | -10.771 | 1.00 | 0.00 |
| ATOM | 6373 | 2HD  | PRO | B | 231 | 55.101 | 24.736 | -11.058 | 1.00 | 0.00 |
| ATOM | 6374 | N    | LEU | B | 232 | 56.953 | 20.377 | -9.936  | 1.00 | 0.00 |
| ATOM | 6375 | CA   | LEU | B | 232 | 57.319 | 19.112 | -9.303  | 1.00 | 0.00 |
| ATOM | 6376 | C    | LEU | B | 232 | 56.135 | 18.468 | -8.599  | 1.00 | 0.00 |
| ATOM | 6377 | O    | LEU | B | 232 | 55.761 | 17.338 | -8.885  | 1.00 | 0.00 |
| ATOM | 6378 | CB   | LEU | B | 232 | 58.490 | 19.306 | -8.338  | 1.00 | 0.00 |
| ATOM | 6379 | CG   | LEU | B | 232 | 59.769 | 19.768 | -9.038  | 1.00 | 0.00 |
| ATOM | 6380 | CD1  | LEU | B | 232 | 60.872 | 20.094 | -8.032  | 1.00 | 0.00 |
| ATOM | 6381 | CD2  | LEU | B | 232 | 60.238 | 18.771 | -10.101 | 1.00 | 0.00 |
| ATOM | 6382 | H    | LEU | B | 232 | 56.786 | 21.183 | -9.377  | 1.00 | 0.00 |
| ATOM | 6383 | HA   | LEU | B | 232 | 57.641 | 18.402 | -10.064 | 1.00 | 0.00 |
| ATOM | 6384 | 1HB  | LEU | B | 232 | 58.078 | 20.100 | -7.717  | 1.00 | 0.00 |
| ATOM | 6385 | 2HB  | LEU | B | 232 | 58.660 | 18.419 | -7.727  | 1.00 | 0.00 |
| ATOM | 6386 | HG   | LEU | B | 232 | 59.534 | 20.695 | -9.562  | 1.00 | 0.00 |
| ATOM | 6387 | 1HD1 | LEU | B | 232 | 61.766 | 20.419 | -8.564  | 1.00 | 0.00 |
| ATOM | 6388 | 2HD1 | LEU | B | 232 | 60.536 | 20.892 | -7.369  | 1.00 | 0.00 |
| ATOM | 6389 | 3HD1 | LEU | B | 232 | 61.103 | 19.206 | -7.445  | 1.00 | 0.00 |
| ATOM | 6390 | 1HD2 | LEU | B | 232 | 61.149 | 19.143 | -10.571 | 1.00 | 0.00 |
| ATOM | 6391 | 2HD2 | LEU | B | 232 | 60.439 | 17.807 | -9.633  | 1.00 | 0.00 |
| ATOM | 6392 | 3HD2 | LEU | B | 232 | 59.462 | 18.653 | -10.857 | 1.00 | 0.00 |
| ATOM | 6393 | N    | VAL | B | 233 | 55.526 | 19.271 | -7.704  | 1.00 | 0.00 |
| ATOM | 6394 | CA   | VAL | B | 233 | 54.328 | 18.857 | -6.958  | 1.00 | 0.00 |
| ATOM | 6395 | C    | VAL | B | 233 | 53.286 | 18.141 | -7.812  | 1.00 | 0.00 |
| ATOM | 6396 | O    | VAL | B | 233 | 52.778 | 17.081 | -7.471  | 1.00 | 0.00 |
| ATOM | 6397 | CB   | VAL | B | 233 | 53.652 | 20.068 | -6.288  | 1.00 | 0.00 |
| ATOM | 6398 | CG1  | VAL | B | 233 | 52.323 | 19.661 | -5.669  | 1.00 | 0.00 |
| ATOM | 6399 | CG2  | VAL | B | 233 | 54.565 | 20.674 | -5.233  | 1.00 | 0.00 |
| ATOM | 6400 | H    | VAL | B | 233 | 55.873 | 20.197 | -7.573  | 1.00 | 0.00 |
| ATOM | 6401 | HA   | VAL | B | 233 | 54.572 | 18.120 | -6.192  | 1.00 | 0.00 |
| ATOM | 6402 | HB   | VAL | B | 233 | 53.481 | 20.839 | -7.039  | 1.00 | 0.00 |
| ATOM | 6403 | 1HG1 | VAL | B | 233 | 51.858 | 20.528 | -5.200  | 1.00 | 0.00 |
| ATOM | 6404 | 2HG1 | VAL | B | 233 | 51.664 | 19.272 | -6.445  | 1.00 | 0.00 |
| ATOM | 6405 | 3HG1 | VAL | B | 233 | 52.493 | 18.890 | -4.917  | 1.00 | 0.00 |
| ATOM | 6406 | 1HG2 | VAL | B | 233 | 54.072 | 21.528 | -4.769  | 1.00 | 0.00 |
| ATOM | 6407 | 2HG2 | VAL | B | 233 | 54.786 | 19.925 | -4.471  | 1.00 | 0.00 |
| ATOM | 6408 | 3HG2 | VAL | B | 233 | 55.494 | 21.000 | -5.701  | 1.00 | 0.00 |
| ATOM | 6409 | N    | LEU | B | 234 | 53.039 | 18.740 | -8.987  | 1.00 | 0.00 |
| ATOM | 6410 | CA   | LEU | B | 234 | 52.160 | 18.119 | -9.983  | 1.00 | 0.00 |
| ATOM | 6411 | C    | LEU | B | 234 | 52.319 | 16.619 | -10.212 | 1.00 | 0.00 |
| ATOM | 6412 | O    | LEU | B | 234 | 51.361 | 15.861 | -10.301 | 1.00 | 0.00 |
| ATOM | 6413 | CB   | LEU | B | 234 | 52.314 | 18.869 | -11.301 | 1.00 | 0.00 |
| ATOM | 6414 | CG   | LEU | B | 234 | 51.249 | 19.947 | -11.444 | 1.00 | 0.00 |
| ATOM | 6415 | CD1  | LEU | B | 234 | 51.628 | 21.003 | -12.480 | 1.00 | 0.00 |
| ATOM | 6416 | CD2  | LEU | B | 234 | 49.889 | 19.309 | -11.718 | 1.00 | 0.00 |
| ATOM | 6417 | H    | LEU | B | 234 | 53.419 | 19.655 | -9.127  | 1.00 | 0.00 |
| ATOM | 6418 | HA   | LEU | B | 234 | 51.123 | 18.206 | -9.659  | 1.00 | 0.00 |
| ATOM | 6419 | 1HB  | LEU | B | 234 | 53.301 | 19.301 | -11.145 | 1.00 | 0.00 |
| ATOM | 6420 | 2HB  | LEU | B | 234 | 52.346 | 18.188 | -12.151 | 1.00 | 0.00 |
| ATOM | 6421 | HG   | LEU | B | 234 | 51.182 | 20.466 | -10.488 | 1.00 | 0.00 |

PEDF\_P1\_final\_docking\_model.txt

|      |      |      |     |   |     |        |        |         |      |      |
|------|------|------|-----|---|-----|--------|--------|---------|------|------|
| ATOM | 6422 | 1HD1 | LEU | B | 234 | 50.837 | 21.751 | -12.545 | 1.00 | 0.00 |
| ATOM | 6423 | 2HD1 | LEU | B | 234 | 52.558 | 21.488 | -12.182 | 1.00 | 0.00 |
| ATOM | 6424 | 3HD1 | LEU | B | 234 | 51.760 | 20.530 | -13.451 | 1.00 | 0.00 |
| ATOM | 6425 | 1HD2 | LEU | B | 234 | 49.135 | 20.090 | -11.819 | 1.00 | 0.00 |
| ATOM | 6426 | 2HD2 | LEU | B | 234 | 49.937 | 18.730 | -12.641 | 1.00 | 0.00 |
| ATOM | 6427 | 3HD2 | LEU | B | 234 | 49.621 | 18.651 | -10.891 | 1.00 | 0.00 |
| ATOM | 6428 | N    | ARG | B | 235 | 53.595 | 16.221 | -10.304 | 1.00 | 0.00 |
| ATOM | 6429 | CA   | ARG | B | 235 | 53.880 | 14.804 | -10.531 | 1.00 | 0.00 |
| ATOM | 6430 | C    | ARG | B | 235 | 53.551 | 13.946 | -9.329  | 1.00 | 0.00 |
| ATOM | 6431 | O    | ARG | B | 235 | 52.990 | 12.861 | -9.436  | 1.00 | 0.00 |
| ATOM | 6432 | CB   | ARG | B | 235 | 55.315 | 14.577 | -10.982 | 1.00 | 0.00 |
| ATOM | 6433 | CG   | ARG | B | 235 | 55.624 | 15.049 | -12.395 | 1.00 | 0.00 |
| ATOM | 6434 | CD   | ARG | B | 235 | 57.045 | 14.890 | -12.796 | 1.00 | 0.00 |
| ATOM | 6435 | NE   | ARG | B | 235 | 57.345 | 15.344 | -14.144 | 1.00 | 0.00 |
| ATOM | 6436 | CZ   | ARG | B | 235 | 58.577 | 15.366 | -14.688 | 1.00 | 0.00 |
| ATOM | 6437 | NH1  | ARG | B | 235 | 59.631 | 14.995 | -13.994 | 1.00 | 0.00 |
| ATOM | 6438 | NH2  | ARG | B | 235 | 58.704 | 15.792 | -15.933 | 1.00 | 0.00 |
| ATOM | 6439 | H    | ARG | B | 235 | 54.318 | 16.867 | -10.062 | 1.00 | 0.00 |
| ATOM | 6440 | HA   | ARG | B | 235 | 53.257 | 14.428 | -11.343 | 1.00 | 0.00 |
| ATOM | 6441 | 1HB  | ARG | B | 235 | 55.957 | 15.106 | -10.278 | 1.00 | 0.00 |
| ATOM | 6442 | 2HB  | ARG | B | 235 | 55.505 | 13.507 | -10.912 | 1.00 | 0.00 |
| ATOM | 6443 | 1HG  | ARG | B | 235 | 55.012 | 14.478 | -13.093 | 1.00 | 0.00 |
| ATOM | 6444 | 2HG  | ARG | B | 235 | 55.371 | 16.107 | -12.470 | 1.00 | 0.00 |
| ATOM | 6445 | 1HD  | ARG | B | 235 | 57.673 | 15.459 | -12.112 | 1.00 | 0.00 |
| ATOM | 6446 | 2HD  | ARG | B | 235 | 57.312 | 13.834 | -12.740 | 1.00 | 0.00 |
| ATOM | 6447 | HE   | ARG | B | 235 | 56.723 | 15.700 | -14.858 | 1.00 | 0.00 |
| ATOM | 6448 | 1HH1 | ARG | B | 235 | 59.520 | 14.688 | -13.038 | 1.00 | 0.00 |
| ATOM | 6449 | 2HH1 | ARG | B | 235 | 60.546 | 15.018 | -14.420 | 1.00 | 0.00 |
| ATOM | 6450 | 1HH2 | ARG | B | 235 | 57.886 | 16.090 | -16.446 | 1.00 | 0.00 |
| ATOM | 6451 | 2HH2 | ARG | B | 235 | 59.616 | 15.818 | -16.364 | 1.00 | 0.00 |
| ATOM | 6452 | N    | GLU | B | 236 | 53.895 | 14.509 | -8.166  | 1.00 | 0.00 |
| ATOM | 6453 | CA   | GLU | B | 236 | 53.626 | 13.784 | -6.926  | 1.00 | 0.00 |
| ATOM | 6454 | C    | GLU | B | 236 | 52.146 | 13.550 | -6.687  | 1.00 | 0.00 |
| ATOM | 6455 | O    | GLU | B | 236 | 51.703 | 12.463 | -6.328  | 1.00 | 0.00 |
| ATOM | 6456 | CB   | GLU | B | 236 | 54.224 | 14.538 | -5.736  | 1.00 | 0.00 |
| ATOM | 6457 | CG   | GLU | B | 236 | 55.744 | 14.507 | -5.671  | 1.00 | 0.00 |
| ATOM | 6458 | CD   | GLU | B | 236 | 56.259 | 13.097 | -5.591  | 1.00 | 0.00 |
| ATOM | 6459 | OE1  | GLU | B | 236 | 55.813 | 12.369 | -4.737  | 1.00 | 0.00 |
| ATOM | 6460 | OE2  | GLU | B | 236 | 57.013 | 12.711 | -6.453  | 1.00 | 0.00 |
| ATOM | 6461 | H    | GLU | B | 236 | 54.347 | 15.402 | -8.154  | 1.00 | 0.00 |
| ATOM | 6462 | HA   | GLU | B | 236 | 54.074 | 12.791 | -6.974  | 1.00 | 0.00 |
| ATOM | 6463 | 1HB  | GLU | B | 236 | 53.885 | 15.572 | -5.812  | 1.00 | 0.00 |
| ATOM | 6464 | 2HB  | GLU | B | 236 | 53.813 | 14.086 | -4.833  | 1.00 | 0.00 |
| ATOM | 6465 | 1HG  | GLU | B | 236 | 56.224 | 15.022 | -6.503  | 1.00 | 0.00 |
| ATOM | 6466 | 2HG  | GLU | B | 236 | 55.972 | 15.029 | -4.743  | 1.00 | 0.00 |
| ATOM | 6467 | N    | MET | B | 237 | 51.386 | 14.614 | -6.996  | 1.00 | 0.00 |
| ATOM | 6468 | CA   | MET | B | 237 | 49.931 | 14.490 | -7.066  | 1.00 | 0.00 |
| ATOM | 6469 | C    | MET | B | 237 | 49.481 | 13.399 | -8.023  | 1.00 | 0.00 |
| ATOM | 6470 | O    | MET | B | 237 | 48.723 | 12.502 | -7.678  | 1.00 | 0.00 |
| ATOM | 6471 | CB   | MET | B | 237 | 49.315 | 15.825 | -7.480  | 1.00 | 0.00 |
| ATOM | 6472 | CG   | MET | B | 237 | 49.500 | 16.945 | -6.466  | 1.00 | 0.00 |
| ATOM | 6473 | SD   | MET | B | 237 | 48.384 | 18.333 | -6.752  | 1.00 | 0.00 |
| ATOM | 6474 | CE   | MET | B | 237 | 49.087 | 19.031 | -8.243  | 1.00 | 0.00 |
| ATOM | 6475 | H    | MET | B | 237 | 51.848 | 15.477 | -7.197  | 1.00 | 0.00 |
| ATOM | 6476 | HA   | MET | B | 237 | 49.535 | 14.208 | -6.091  | 1.00 | 0.00 |
| ATOM | 6477 | 1HB  | MET | B | 237 | 49.778 | 16.109 | -8.424  | 1.00 | 0.00 |
| ATOM | 6478 | 2HB  | MET | B | 237 | 48.250 | 15.649 | -7.635  | 1.00 | 0.00 |
| ATOM | 6479 | 1HG  | MET | B | 237 | 49.317 | 16.538 | -5.472  | 1.00 | 0.00 |
| ATOM | 6480 | 2HG  | MET | B | 237 | 50.530 | 17.295 | -6.531  | 1.00 | 0.00 |
| ATOM | 6481 | 1HE  | MET | B | 237 | 48.505 | 19.902 | -8.548  | 1.00 | 0.00 |
| ATOM | 6482 | 2HE  | MET | B | 237 | 50.118 | 19.332 | -8.053  | 1.00 | 0.00 |
| ATOM | 6483 | 3HE  | MET | B | 237 | 49.067 | 18.285 | -9.038  | 1.00 | 0.00 |
| ATOM | 6484 | N    | CYS | B | 238 | 50.018 | 13.499 | -9.252  | 1.00 | 0.00 |

PEDF\_P1\_final\_docking\_model.txt

|      |      |      |     |   |     |        |        |         |      |      |
|------|------|------|-----|---|-----|--------|--------|---------|------|------|
| ATOM | 6485 | CA   | CYS | B | 238 | 49.657 | 12.534 | -10.293 | 1.00 | 0.00 |
| ATOM | 6486 | C    | CYS | B | 238 | 49.773 | 11.074 | -9.879  | 1.00 | 0.00 |
| ATOM | 6487 | O    | CYS | B | 238 | 48.901 | 10.250 | -10.134 | 1.00 | 0.00 |
| ATOM | 6488 | CB   | CYS | B | 238 | 50.445 | 12.818 | -11.574 | 1.00 | 0.00 |
| ATOM | 6489 | SG   | CYS | B | 238 | 49.823 | 11.958 | -13.043 | 1.00 | 0.00 |
| ATOM | 6490 | H    | CYS | B | 238 | 50.618 | 14.273 | -9.459  | 1.00 | 0.00 |
| ATOM | 6491 | HA   | CYS | B | 238 | 48.653 | 12.683 | -10.692 | 1.00 | 0.00 |
| ATOM | 6492 | 1HB  | CYS | B | 238 | 50.412 | 13.882 | -11.810 | 1.00 | 0.00 |
| ATOM | 6493 | 2HB  | CYS | B | 238 | 51.482 | 12.504 | -11.456 | 1.00 | 0.00 |
| ATOM | 6494 | HG   | CYS | B | 238 | 50.730 | 12.447 | -13.884 | 1.00 | 0.00 |
| ATOM | 6495 | N    | LYS | B | 239 | 50.878 | 10.810 | -9.158  | 1.00 | 0.00 |
| ATOM | 6496 | CA   | LYS | B | 239 | 51.114 | 9.468  | -8.622  | 1.00 | 0.00 |
| ATOM | 6497 | C    | LYS | B | 239 | 49.977 | 8.878  | -7.803  | 1.00 | 0.00 |
| ATOM | 6498 | O    | LYS | B | 239 | 49.727 | 7.680  | -7.829  | 1.00 | 0.00 |
| ATOM | 6499 | CB   | LYS | B | 239 | 52.383 | 9.478  | -7.769  | 1.00 | 0.00 |
| ATOM | 6500 | CG   | LYS | B | 239 | 53.674 | 9.635  | -8.563  | 1.00 | 0.00 |
| ATOM | 6501 | CD   | LYS | B | 239 | 54.890 | 9.628  | -7.649  | 1.00 | 0.00 |
| ATOM | 6502 | CE   | LYS | B | 239 | 56.178 | 9.809  | -8.439  | 1.00 | 0.00 |
| ATOM | 6503 | NZ   | LYS | B | 239 | 57.374 | 9.829  | -7.555  | 1.00 | 0.00 |
| ATOM | 6504 | H    | LYS | B | 239 | 51.537 | 11.550 | -9.008  | 1.00 | 0.00 |
| ATOM | 6505 | HA   | LYS | B | 239 | 51.239 | 8.760  | -9.442  | 1.00 | 0.00 |
| ATOM | 6506 | 1HB  | LYS | B | 239 | 52.288 | 10.304 | -7.064  | 1.00 | 0.00 |
| ATOM | 6507 | 2HB  | LYS | B | 239 | 52.408 | 8.535  | -7.222  | 1.00 | 0.00 |
| ATOM | 6508 | 1HG  | LYS | B | 239 | 53.747 | 8.810  | -9.273  | 1.00 | 0.00 |
| ATOM | 6509 | 2HG  | LYS | B | 239 | 53.633 | 10.579 | -9.106  | 1.00 | 0.00 |
| ATOM | 6510 | 1HD  | LYS | B | 239 | 54.787 | 10.441 | -6.928  | 1.00 | 0.00 |
| ATOM | 6511 | 2HD  | LYS | B | 239 | 54.920 | 8.676  | -7.119  | 1.00 | 0.00 |
| ATOM | 6512 | 1HE  | LYS | B | 239 | 56.263 | 8.986  | -9.147  | 1.00 | 0.00 |
| ATOM | 6513 | 2HE  | LYS | B | 239 | 56.115 | 10.751 | -8.984  | 1.00 | 0.00 |
| ATOM | 6514 | 1HZ  | LYS | B | 239 | 58.206 | 9.950  | -8.116  | 1.00 | 0.00 |
| ATOM | 6515 | 2HZ  | LYS | B | 239 | 57.296 | 10.592 | -6.898  | 1.00 | 0.00 |
| ATOM | 6516 | 3HZ  | LYS | B | 239 | 57.435 | 8.956  | -7.049  | 1.00 | 0.00 |
| ATOM | 6517 | N    | GLN | B | 240 | 49.275 | 9.769  | -7.086  | 1.00 | 0.00 |
| ATOM | 6518 | CA   | GLN | B | 240 | 48.170 | 9.286  | -6.257  | 1.00 | 0.00 |
| ATOM | 6519 | C    | GLN | B | 240 | 46.864 | 9.102  | -7.024  | 1.00 | 0.00 |
| ATOM | 6520 | O    | GLN | B | 240 | 45.806 | 9.608  | -6.667  | 1.00 | 0.00 |
| ATOM | 6521 | CB   | GLN | B | 240 | 47.934 | 10.251 | -5.092  | 1.00 | 0.00 |
| ATOM | 6522 | CG   | GLN | B | 240 | 49.108 | 10.373 | -4.136  | 1.00 | 0.00 |
| ATOM | 6523 | CD   | GLN | B | 240 | 49.423 | 9.064  | -3.436  | 1.00 | 0.00 |
| ATOM | 6524 | OE1  | GLN | B | 240 | 48.522 | 8.365  | -2.963  | 1.00 | 0.00 |
| ATOM | 6525 | NE2  | GLN | B | 240 | 50.705 | 8.726  | -3.363  | 1.00 | 0.00 |
| ATOM | 6526 | H    | GLN | B | 240 | 49.450 | 10.749 | -7.190  | 1.00 | 0.00 |
| ATOM | 6527 | HA   | GLN | B | 240 | 48.411 | 8.296  | -5.868  | 1.00 | 0.00 |
| ATOM | 6528 | 1HB  | GLN | B | 240 | 47.712 | 11.224 | -5.530  | 1.00 | 0.00 |
| ATOM | 6529 | 2HB  | GLN | B | 240 | 47.058 | 9.887  | -4.554  | 1.00 | 0.00 |
| ATOM | 6530 | 1HG  | GLN | B | 240 | 50.053 | 10.836 | -4.418  | 1.00 | 0.00 |
| ATOM | 6531 | 2HG  | GLN | B | 240 | 48.582 | 11.021 | -3.435  | 1.00 | 0.00 |
| ATOM | 6532 | 1HE2 | GLN | B | 240 | 50.973 | 7.874  | -2.913  | 1.00 | 0.00 |
| ATOM | 6533 | 2HE2 | GLN | B | 240 | 51.403 | 9.323  | -3.759  | 1.00 | 0.00 |
| ATOM | 6534 | N    | GLY | B | 241 | 46.990 | 8.376  | -8.147  | 1.00 | 0.00 |
| ATOM | 6535 | CA   | GLY | B | 241 | 45.834 | 8.187  | -9.021  | 1.00 | 0.00 |
| ATOM | 6536 | C    | GLY | B | 241 | 45.357 | 9.431  | -9.760  | 1.00 | 0.00 |
| ATOM | 6537 | O    | GLY | B | 241 | 44.353 | 9.418  | -10.468 | 1.00 | 0.00 |
| ATOM | 6538 | H    | GLY | B | 241 | 47.881 | 7.970  | -8.355  | 1.00 | 0.00 |
| ATOM | 6539 | 1HA  | GLY | B | 241 | 46.081 | 7.445  | -9.782  | 1.00 | 0.00 |
| ATOM | 6540 | 2HA  | GLY | B | 241 | 44.993 | 7.831  | -8.428  | 1.00 | 0.00 |
| ATOM | 6541 | N    | TYR | B | 242 | 46.108 | 10.521 | -9.576  | 1.00 | 0.00 |
| ATOM | 6542 | CA   | TYR | B | 242 | 45.644 | 11.785 | -10.125 | 1.00 | 0.00 |
| ATOM | 6543 | C    | TYR | B | 242 | 46.216 | 12.043 | -11.506 | 1.00 | 0.00 |
| ATOM | 6544 | O    | TYR | B | 242 | 46.949 | 12.990 | -11.757 | 1.00 | 0.00 |
| ATOM | 6545 | CB   | TYR | B | 242 | 45.928 | 12.897 | -9.107  | 1.00 | 0.00 |
| ATOM | 6546 | CG   | TYR | B | 242 | 45.460 | 14.260 | -9.566  | 1.00 | 0.00 |
| ATOM | 6547 | CD1  | TYR | B | 242 | 44.140 | 14.429 | -10.025 | 1.00 | 0.00 |



PEDF\_P1\_final\_docking\_model.txt

|      |      |      |     |   |     |        |        |         |      |      |
|------|------|------|-----|---|-----|--------|--------|---------|------|------|
| ATOM | 6548 | CD2  | TYR | B | 242 | 46.378 | 15.328 | -9.518  | 1.00 | 0.00 |
| ATOM | 6549 | CE1  | TYR | B | 242 | 43.737 | 15.695 | -10.466 | 1.00 | 0.00 |
| ATOM | 6550 | CE2  | TYR | B | 242 | 45.971 | 16.600 | -9.952  | 1.00 | 0.00 |
| ATOM | 6551 | CZ   | TYR | B | 242 | 44.655 | 16.763 | -10.428 | 1.00 | 0.00 |
| ATOM | 6552 | OH   | TYR | B | 242 | 44.244 | 18.002 | -10.872 | 1.00 | 0.00 |
| ATOM | 6553 | H    | TYR | B | 242 | 47.016 | 10.449 | -9.160  | 1.00 | 0.00 |
| ATOM | 6554 | HA   | TYR | B | 242 | 44.561 | 11.761 | -10.245 | 1.00 | 0.00 |
| ATOM | 6555 | 1HB  | TYR | B | 242 | 45.419 | 12.625 | -8.182  | 1.00 | 0.00 |
| ATOM | 6556 | 2HB  | TYR | B | 242 | 47.004 | 12.914 | -8.939  | 1.00 | 0.00 |
| ATOM | 6557 | HD1  | TYR | B | 242 | 43.469 | 13.570 | -10.024 | 1.00 | 0.00 |
| ATOM | 6558 | HD2  | TYR | B | 242 | 47.384 | 15.141 | -9.146  | 1.00 | 0.00 |
| ATOM | 6559 | HE1  | TYR | B | 242 | 42.722 | 15.856 | -10.828 | 1.00 | 0.00 |
| ATOM | 6560 | HE2  | TYR | B | 242 | 46.669 | 17.437 | -9.917  | 1.00 | 0.00 |
| ATOM | 6561 | HH   | TYR | B | 242 | 44.801 | 18.669 | -10.489 | 1.00 | 0.00 |
| ATOM | 6562 | N    | ARG | B | 243 | 45.814 | 11.142 | -12.416 | 1.00 | 0.00 |
| ATOM | 6563 | CA   | ARG | B | 243 | 46.341 | 11.183 | -13.787 | 1.00 | 0.00 |
| ATOM | 6564 | C    | ARG | B | 243 | 46.229 | 12.533 | -14.487 | 1.00 | 0.00 |
| ATOM | 6565 | O    | ARG | B | 243 | 47.068 | 12.943 | -15.279 | 1.00 | 0.00 |
| ATOM | 6566 | CB   | ARG | B | 243 | 45.716 | 10.094 | -14.645 | 1.00 | 0.00 |
| ATOM | 6567 | CG   | ARG | B | 243 | 46.148 | 8.678  | -14.297 | 1.00 | 0.00 |
| ATOM | 6568 | CD   | ARG | B | 243 | 45.509 | 7.622  | -15.123 | 1.00 | 0.00 |
| ATOM | 6569 | NE   | ARG | B | 243 | 45.882 | 6.264  | -14.760 | 1.00 | 0.00 |
| ATOM | 6570 | CZ   | ARG | B | 243 | 45.338 | 5.152  | -15.293 | 1.00 | 0.00 |
| ATOM | 6571 | NH1  | ARG | B | 243 | 44.374 | 5.230  | -16.183 | 1.00 | 0.00 |
| ATOM | 6572 | NH2  | ARG | B | 243 | 45.785 | 3.980  | -14.880 | 1.00 | 0.00 |
| ATOM | 6573 | H    | ARG | B | 243 | 45.206 | 10.419 | -12.088 | 1.00 | 0.00 |
| ATOM | 6574 | HA   | ARG | B | 243 | 47.412 | 10.978 | -13.777 | 1.00 | 0.00 |
| ATOM | 6575 | 1HB  | ARG | B | 243 | 44.636 | 10.178 | -14.532 | 1.00 | 0.00 |
| ATOM | 6576 | 2HB  | ARG | B | 243 | 45.990 | 10.308 | -15.679 | 1.00 | 0.00 |
| ATOM | 6577 | 1HG  | ARG | B | 243 | 47.228 | 8.602  | -14.431 | 1.00 | 0.00 |
| ATOM | 6578 | 2HG  | ARG | B | 243 | 45.897 | 8.487  | -13.254 | 1.00 | 0.00 |
| ATOM | 6579 | 1HD  | ARG | B | 243 | 44.427 | 7.701  | -15.022 | 1.00 | 0.00 |
| ATOM | 6580 | 2HD  | ARG | B | 243 | 45.788 | 7.770  | -16.165 | 1.00 | 0.00 |
| ATOM | 6581 | HE   | ARG | B | 243 | 46.568 | 5.942  | -14.090 | 1.00 | 0.00 |
| ATOM | 6582 | 1HH1 | ARG | B | 243 | 44.031 | 6.135  | -16.476 | 1.00 | 0.00 |
| ATOM | 6583 | 2HH1 | ARG | B | 243 | 43.979 | 4.385  | -16.570 | 1.00 | 0.00 |
| ATOM | 6584 | 1HH2 | ARG | B | 243 | 46.515 | 3.938  | -14.182 | 1.00 | 0.00 |
| ATOM | 6585 | 2HH2 | ARG | B | 243 | 45.395 | 3.131  | -15.262 | 1.00 | 0.00 |
| ATOM | 6586 | N    | ASP | B | 244 | 45.149 | 13.233 | -14.113 | 1.00 | 0.00 |
| ATOM | 6587 | CA   | ASP | B | 244 | 44.933 | 14.612 | -14.552 | 1.00 | 0.00 |
| ATOM | 6588 | C    | ASP | B | 244 | 46.146 | 15.523 | -14.456 | 1.00 | 0.00 |
| ATOM | 6589 | O    | ASP | B | 244 | 46.419 | 16.325 | -15.343 | 1.00 | 0.00 |
| ATOM | 6590 | CB   | ASP | B | 244 | 43.785 | 15.230 | -13.751 | 1.00 | 0.00 |
| ATOM | 6591 | CG   | ASP | B | 244 | 42.404 | 14.708 | -14.124 | 1.00 | 0.00 |
| ATOM | 6592 | OD1  | ASP | B | 244 | 42.294 | 14.046 | -15.129 | 1.00 | 0.00 |
| ATOM | 6593 | OD2  | ASP | B | 244 | 41.506 | 14.839 | -13.328 | 1.00 | 0.00 |
| ATOM | 6594 | H    | ASP | B | 244 | 44.427 | 12.794 | -13.579 | 1.00 | 0.00 |
| ATOM | 6595 | HA   | ASP | B | 244 | 44.678 | 14.626 | -15.612 | 1.00 | 0.00 |
| ATOM | 6596 | 1HB  | ASP | B | 244 | 43.921 | 15.157 | -12.672 | 1.00 | 0.00 |
| ATOM | 6597 | 2HB  | ASP | B | 244 | 43.875 | 16.272 | -14.060 | 1.00 | 0.00 |
| ATOM | 6598 | N    | GLY | B | 245 | 46.881 | 15.329 | -13.348 | 1.00 | 0.00 |
| ATOM | 6599 | CA   | GLY | B | 245 | 48.115 | 16.075 | -13.108 | 1.00 | 0.00 |
| ATOM | 6600 | C    | GLY | B | 245 | 49.090 | 16.093 | -14.271 | 1.00 | 0.00 |
| ATOM | 6601 | O    | GLY | B | 245 | 49.712 | 17.103 | -14.568 | 1.00 | 0.00 |
| ATOM | 6602 | H    | GLY | B | 245 | 46.595 | 14.630 | -12.693 | 1.00 | 0.00 |
| ATOM | 6603 | 1HA  | GLY | B | 245 | 47.866 | 17.112 | -12.883 | 1.00 | 0.00 |
| ATOM | 6604 | 2HA  | GLY | B | 245 | 48.637 | 15.636 | -12.259 | 1.00 | 0.00 |
| ATOM | 6605 | N    | LEU | B | 246 | 49.171 | 14.937 | -14.953 | 1.00 | 0.00 |
| ATOM | 6606 | CA   | LEU | B | 246 | 50.042 | 14.889 | -16.125 | 1.00 | 0.00 |
| ATOM | 6607 | C    | LEU | B | 246 | 49.668 | 15.878 | -17.223 | 1.00 | 0.00 |
| ATOM | 6608 | O    | LEU | B | 246 | 50.510 | 16.552 | -17.798 | 1.00 | 0.00 |
| ATOM | 6609 | CB   | LEU | B | 246 | 50.049 | 13.466 | -16.697 | 1.00 | 0.00 |
| ATOM | 6610 | CG   | LEU | B | 246 | 50.936 | 13.263 | -17.933 | 1.00 | 0.00 |

PEDF\_P1\_final\_docking\_model.txt

|      |      |      |     |   |     |        |        |         |      |      |
|------|------|------|-----|---|-----|--------|--------|---------|------|------|
| ATOM | 6611 | CD1  | LEU | B | 246 | 52.389 | 13.560 | -17.588 | 1.00 | 0.00 |
| ATOM | 6612 | CD2  | LEU | B | 246 | 50.782 | 11.836 | -18.440 | 1.00 | 0.00 |
| ATOM | 6613 | H    | LEU | B | 246 | 48.610 | 14.148 | -14.694 | 1.00 | 0.00 |
| ATOM | 6614 | HA   | LEU | B | 246 | 51.056 | 15.167 | -15.838 | 1.00 | 0.00 |
| ATOM | 6615 | 1HB  | LEU | B | 246 | 50.469 | 12.934 | -15.845 | 1.00 | 0.00 |
| ATOM | 6616 | 2HB  | LEU | B | 246 | 49.039 | 13.104 | -16.890 | 1.00 | 0.00 |
| ATOM | 6617 | HG   | LEU | B | 246 | 50.567 | 13.934 | -18.710 | 1.00 | 0.00 |
| ATOM | 6618 | 1HD1 | LEU | B | 246 | 53.010 | 13.413 | -18.471 | 1.00 | 0.00 |
| ATOM | 6619 | 2HD1 | LEU | B | 246 | 52.479 | 14.592 | -17.249 | 1.00 | 0.00 |
| ATOM | 6620 | 3HD1 | LEU | B | 246 | 52.719 | 12.888 | -16.797 | 1.00 | 0.00 |
| ATOM | 6621 | 1HD2 | LEU | B | 246 | 51.411 | 11.694 | -19.319 | 1.00 | 0.00 |
| ATOM | 6622 | 2HD2 | LEU | B | 246 | 51.083 | 11.137 | -17.659 | 1.00 | 0.00 |
| ATOM | 6623 | 3HD2 | LEU | B | 246 | 49.741 | 11.655 | -18.707 | 1.00 | 0.00 |
| ATOM | 6624 | N    | ARG | B | 247 | 48.346 | 15.974 | -17.460 | 1.00 | 0.00 |
| ATOM | 6625 | CA   | ARG | B | 247 | 47.914 | 16.998 | -18.420 | 1.00 | 0.00 |
| ATOM | 6626 | C    | ARG | B | 247 | 48.157 | 18.407 | -17.901 | 1.00 | 0.00 |
| ATOM | 6627 | O    | ARG | B | 247 | 48.502 | 19.343 | -18.607 | 1.00 | 0.00 |
| ATOM | 6628 | CB   | ARG | B | 247 | 46.464 | 16.815 | -18.840 | 1.00 | 0.00 |
| ATOM | 6629 | CG   | ARG | B | 247 | 46.205 | 15.613 | -19.734 | 1.00 | 0.00 |
| ATOM | 6630 | CD   | ARG | B | 247 | 44.775 | 15.401 | -20.076 | 1.00 | 0.00 |
| ATOM | 6631 | NE   | ARG | B | 247 | 44.521 | 14.246 | -20.922 | 1.00 | 0.00 |
| ATOM | 6632 | CZ   | ARG | B | 247 | 43.297 | 13.812 | -21.278 | 1.00 | 0.00 |
| ATOM | 6633 | NH1  | ARG | B | 247 | 42.211 | 14.409 | -20.836 | 1.00 | 0.00 |
| ATOM | 6634 | NH2  | ARG | B | 247 | 43.214 | 12.754 | -22.066 | 1.00 | 0.00 |
| ATOM | 6635 | H    | ARG | B | 247 | 47.711 | 15.475 | -16.871 | 1.00 | 0.00 |
| ATOM | 6636 | HA   | ARG | B | 247 | 48.495 | 16.911 | -19.339 | 1.00 | 0.00 |
| ATOM | 6637 | 1HB  | ARG | B | 247 | 45.879 | 16.717 | -17.927 | 1.00 | 0.00 |
| ATOM | 6638 | 2HB  | ARG | B | 247 | 46.167 | 17.723 | -19.365 | 1.00 | 0.00 |
| ATOM | 6639 | 1HG  | ARG | B | 247 | 46.755 | 15.748 | -20.666 | 1.00 | 0.00 |
| ATOM | 6640 | 2HG  | ARG | B | 247 | 46.565 | 14.719 | -19.226 | 1.00 | 0.00 |
| ATOM | 6641 | 1HD  | ARG | B | 247 | 44.208 | 15.262 | -19.155 | 1.00 | 0.00 |
| ATOM | 6642 | 2HD  | ARG | B | 247 | 44.402 | 16.279 | -20.602 | 1.00 | 0.00 |
| ATOM | 6643 | HE   | ARG | B | 247 | 45.176 | 13.611 | -21.359 | 1.00 | 0.00 |
| ATOM | 6644 | 1HH1 | ARG | B | 247 | 42.292 | 15.206 | -20.220 | 1.00 | 0.00 |
| ATOM | 6645 | 2HH1 | ARG | B | 247 | 41.303 | 14.068 | -21.116 | 1.00 | 0.00 |
| ATOM | 6646 | 1HH2 | ARG | B | 247 | 44.058 | 12.297 | -22.382 | 1.00 | 0.00 |
| ATOM | 6647 | 2HH2 | ARG | B | 247 | 42.309 | 12.408 | -22.347 | 1.00 | 0.00 |
| ATOM | 6648 | N    | PHE | B | 248 | 47.935 | 18.501 | -16.585 | 1.00 | 0.00 |
| ATOM | 6649 | CA   | PHE | B | 248 | 48.068 | 19.793 | -15.927 | 1.00 | 0.00 |
| ATOM | 6650 | C    | PHE | B | 248 | 49.489 | 20.296 | -15.729 | 1.00 | 0.00 |
| ATOM | 6651 | O    | PHE | B | 248 | 49.704 | 21.454 | -15.379 | 1.00 | 0.00 |
| ATOM | 6652 | CB   | PHE | B | 248 | 47.369 | 19.736 | -14.568 | 1.00 | 0.00 |
| ATOM | 6653 | CG   | PHE | B | 248 | 45.876 | 19.598 | -14.660 | 1.00 | 0.00 |
| ATOM | 6654 | CD1  | PHE | B | 248 | 45.215 | 19.839 | -15.856 | 1.00 | 0.00 |
| ATOM | 6655 | CD2  | PHE | B | 248 | 45.129 | 19.228 | -13.552 | 1.00 | 0.00 |
| ATOM | 6656 | CE1  | PHE | B | 248 | 43.842 | 19.713 | -15.942 | 1.00 | 0.00 |
| ATOM | 6657 | CE2  | PHE | B | 248 | 43.756 | 19.100 | -13.635 | 1.00 | 0.00 |
| ATOM | 6658 | CZ   | PHE | B | 248 | 43.112 | 19.343 | -14.832 | 1.00 | 0.00 |
| ATOM | 6659 | H    | PHE | B | 248 | 47.685 | 17.685 | -16.064 | 1.00 | 0.00 |
| ATOM | 6660 | HA   | PHE | B | 248 | 47.606 | 20.569 | -16.539 | 1.00 | 0.00 |
| ATOM | 6661 | 1HB  | PHE | B | 248 | 47.727 | 18.880 | -13.998 | 1.00 | 0.00 |
| ATOM | 6662 | 2HB  | PHE | B | 248 | 47.563 | 20.650 | -14.009 | 1.00 | 0.00 |
| ATOM | 6663 | HD1  | PHE | B | 248 | 45.792 | 20.130 | -16.734 | 1.00 | 0.00 |
| ATOM | 6664 | HD2  | PHE | B | 248 | 45.638 | 19.038 | -12.606 | 1.00 | 0.00 |
| ATOM | 6665 | HE1  | PHE | B | 248 | 43.335 | 19.904 | -16.887 | 1.00 | 0.00 |
| ATOM | 6666 | HE2  | PHE | B | 248 | 43.180 | 18.808 | -12.757 | 1.00 | 0.00 |
| ATOM | 6667 | HZ   | PHE | B | 248 | 42.029 | 19.244 | -14.898 | 1.00 | 0.00 |
| ATOM | 6668 | N    | LEU | B | 249 | 50.442 | 19.384 | -15.979 | 1.00 | 0.00 |
| ATOM | 6669 | CA   | LEU | B | 249 | 51.861 | 19.725 | -15.921 | 1.00 | 0.00 |
| ATOM | 6670 | C    | LEU | B | 249 | 52.275 | 20.828 | -16.884 | 1.00 | 0.00 |
| ATOM | 6671 | O    | LEU | B | 249 | 53.056 | 21.718 | -16.561 | 1.00 | 0.00 |
| ATOM | 6672 | OXT  | LEU | B | 249 | 51.834 | 20.847 | -18.000 | 1.00 | 0.00 |
| ATOM | 6673 | CB   | LEU | B | 249 | 52.700 | 18.468 | -16.190 | 1.00 | 0.00 |

PEDF\_P1\_final\_docking\_model.txt

|      |      |      |     |   |     |        |        |         |      |      |
|------|------|------|-----|---|-----|--------|--------|---------|------|------|
| ATOM | 6674 | CG   | LEU | B | 249 | 54.217 | 18.660 | -16.074 | 1.00 | 0.00 |
| ATOM | 6675 | CD1  | LEU | B | 249 | 54.594 | 18.990 | -14.636 | 1.00 | 0.00 |
| ATOM | 6676 | CD2  | LEU | B | 249 | 54.926 | 17.396 | -16.541 | 1.00 | 0.00 |
| ATOM | 6677 | H    | LEU | B | 249 | 50.172 | 18.436 | -16.153 | 1.00 | 0.00 |
| ATOM | 6678 | HA   | LEU | B | 249 | 52.103 | 20.115 | -14.933 | 1.00 | 0.00 |
| ATOM | 6679 | 1HB  | LEU | B | 249 | 52.339 | 17.839 | -15.378 | 1.00 | 0.00 |
| ATOM | 6680 | 2HB  | LEU | B | 249 | 52.446 | 18.010 | -17.145 | 1.00 | 0.00 |
| ATOM | 6681 | HG   | LEU | B | 249 | 54.495 | 19.468 | -16.753 | 1.00 | 0.00 |
| ATOM | 6682 | 1HD1 | LEU | B | 249 | 55.674 | 19.124 | -14.565 | 1.00 | 0.00 |
| ATOM | 6683 | 2HD1 | LEU | B | 249 | 54.094 | 19.909 | -14.331 | 1.00 | 0.00 |
| ATOM | 6684 | 3HD1 | LEU | B | 249 | 54.287 | 18.173 | -13.983 | 1.00 | 0.00 |
| ATOM | 6685 | 1HD2 | LEU | B | 249 | 56.005 | 17.534 | -16.460 | 1.00 | 0.00 |
| ATOM | 6686 | 2HD2 | LEU | B | 249 | 54.619 | 16.556 | -15.920 | 1.00 | 0.00 |
| ATOM | 6687 | 3HD2 | LEU | B | 249 | 54.664 | 17.195 | -17.580 | 1.00 | 0.00 |
| TER  |      |      |     |   |     |        |        |         |      |      |
